# Supplementary material for: Development and Verification of Ferroptosis-Related Gene Signature for Predicting the Prognosis and Immune Microenvironment in Gastric Cancer
Source: Research Square preprint supplement (doi:10.21203/rs.3.rs-1235765/v1), 2022-02-07
Supplement: Supplementary file 1 [file GSEA.xlsx]

## Sheet: GSEA
Tag	TCGA-CD-8529-01	TCGA-CG-4443-01	TCGA-BR-7197-01	TCGA-D7-A6EV-01	TCGA-ZA-A8F6-01	TCGA-RD-A8N2-01	TCGA-IN-8462-01	TCGA-D7-A4YX-01	TCGA-BR-7716-01	TCGA-BR-8373-01	TCGA-CG-4301-01	TCGA-FP-7916-01	TCGA-RD-A8N5-01	TCGA-CD-8534-01	TCGA-CG-4469-01	TCGA-BR-8295-01	TCGA-VQ-A91V-01	TCGA-BR-7901-01	TCGA-CG-5725-01	TCGA-HU-A4HB-01	TCGA-BR-6456-01	TCGA-R5-A7ZR-01	TCGA-D7-6818-01	TCGA-IN-8663-01	TCGA-CD-8533-01	TCGA-BR-4294-01	TCGA-VQ-A8PK-01	TCGA-RD-A8N6-01	TCGA-BR-7957-01	TCGA-D7-8574-01	TCGA-IN-A6RN-01	TCGA-FP-7998-01	TCGA-HU-A4GH-01	TCGA-VQ-AA6F-01	TCGA-CG-4436-01	TCGA-BR-6457-01	TCGA-CG-4465-01	TCGA-BR-4267-01	TCGA-HU-A4GQ-01	TCGA-HU-A4H3-01	TCGA-HF-7133-01	TCGA-B7-A5TJ-01	TCGA-HU-A4GP-01	TCGA-KB-A93J-01	TCGA-VQ-A927-01	TCGA-BR-6455-01	TCGA-F1-A448-01	TCGA-SW-A7EA-01	TCGA-VQ-AA6J-01
N_GLYCAN_BIOSYNTHESIS	0.499405	0.505901	0.491637	0.496858	0.489477	0.47007	0.468236	0.493853	0.500848	0.505399	0.489294	0.489271	0.485182	0.486769	0.481239	0.479181	0.500508	0.4977	0.501043	0.487033	0.493954	0.500069	0.513181	0.48677	0.501727	0.518917	0.492425	0.496283	0.494869	0.487759	0.478666	0.49855	0.482588	0.4963	0.497353	0.497352	0.50217	0.501721	0.486202	0.468134	0.509637	0.494826	0.496517	0.49243	0.492886	0.496447	0.493276	0.471271	0.491129
OTHER_GLYCAN_DEGRADATION	0.457804	0.447403	0.474121	0.426028	0.445923	0.402616	0.400522	0.434444	0.454785	0.443328	0.435895	0.449675	0.457248	0.409646	0.427247	0.399051	0.464611	0.424681	0.442667	0.447538	0.43431	0.433662	0.437957	0.451926	0.440255	0.431928	0.459324	0.431551	0.43763	0.44386	0.455559	0.459313	0.464776	0.430667	0.428001	0.435333	0.47275	0.454156	0.421947	0.445631	0.433305	0.452775	0.398991	0.454541	0.441106	0.432239	0.459138	0.416617	0.422795
O_GLYCAN_BIOSYNTHESIS	0.389578	0.300963	0.311822	0.334158	0.36907	0.335812	0.373418	0.336813	0.394496	0.355384	0.409374	0.366951	0.396877	0.329023	0.31097	0.3123	0.373033	0.376981	0.315544	0.382651	0.364124	0.357106	0.368005	0.301724	0.319932	0.376622	0.364411	0.335496	0.396534	0.347867	0.381569	0.34837	0.339107	0.365867	0.345498	0.378549	0.371655	0.367439	0.334307	0.317267	0.401252	0.36787	0.363334	0.35115	0.415513	0.344303	0.407471	0.330157	0.339107
GLYCOSAMINOGLYCAN_DEGRADATION	0.437179	0.38077	0.374424	0.405793	0.383738	0.363686	0.421565	0.383405	0.42786	0.384013	0.377701	0.391946	0.418831	0.359254	0.377386	0.358828	0.406066	0.438896	0.406959	0.399503	0.401037	0.415967	0.423641	0.391908	0.36303	0.366271	0.37747	0.338842	0.391591	0.387429	0.39362	0.400439	0.369315	0.387031	0.390435	0.411198	0.400243	0.399686	0.388923	0.414886	0.427742	0.378297	0.398497	0.4094	0.399526	0.372447	0.415769	0.360305	0.377365
GLYCOSAMINOGLYCAN_BIOSYNTHESIS_KERATAN_SULFATE	0.497213	0.417562	0.43908	0.460903	0.464139	0.417646	0.45432	0.41772	0.466398	0.44188	0.430633	0.458624	0.472221	0.403576	0.425397	0.432711	0.430959	0.482697	0.431288	0.443603	0.43694	0.418174	0.455523	0.447122	0.405707	0.410535	0.466374	0.418759	0.471955	0.423795	0.427165	0.448116	0.471641	0.481018	0.391217	0.462217	0.454605	0.461463	0.43052	0.376268	0.471315	0.466901	0.418557	0.448836	0.468271	0.446833	0.49668	0.418862	0.454378
GLYCEROLIPID_METABOLISM	0.381387	0.365422	0.377094	0.377779	0.387403	0.341953	0.358535	0.329895	0.416125	0.392216	0.381581	0.363874	0.371917	0.363743	0.373367	0.378804	0.358465	0.38544	0.347616	0.388538	0.389587	0.393542	0.374898	0.337966	0.351443	0.398212	0.376369	0.37725	0.390664	0.370035	0.402842	0.356883	0.375911	0.385461	0.391379	0.385297	0.398447	0.378295	0.355977	0.344672	0.372369	0.3767	0.387346	0.381151	0.384834	0.378292	0.367062	0.338014	0.385344
GLYCOSYLPHOSPHATIDYLINOSITOL_GPI_ANCHOR_BIOSYNTHESIS	0.441543	0.483035	0.449258	0.455752	0.441943	0.435229	0.437511	0.440017	0.439113	0.444342	0.450833	0.44824	0.42362	0.433986	0.436039	0.441311	0.452307	0.449272	0.467903	0.43223	0.441846	0.456099	0.446685	0.443299	0.466023	0.490871	0.441257	0.446732	0.430904	0.417565	0.442662	0.437328	0.458288	0.457683	0.467009	0.432809	0.456587	0.449794	0.448559	0.437787	0.454638	0.444376	0.449688	0.453267	0.438019	0.459933	0.430895	0.428789	0.4493
GLYCEROPHOSPHOLIPID_METABOLISM	0.399902	0.359231	0.378592	0.390566	0.40797	0.368651	0.382832	0.365786	0.410005	0.400957	0.374792	0.377304	0.388387	0.364488	0.386282	0.344163	0.390376	0.387103	0.374849	0.39976	0.395291	0.385136	0.386778	0.36198	0.370091	0.357968	0.38092	0.387366	0.394029	0.380932	0.38363	0.378229	0.387895	0.38387	0.377791	0.39277	0.391256	0.371912	0.383227	0.368836	0.387263	0.401082	0.38908	0.392741	0.409101	0.387227	0.385014	0.37004	0.384889
ETHER_LIPID_METABOLISM	0.381624	0.318054	0.308102	0.335947	0.381231	0.301642	0.355167	0.320661	0.382478	0.34725	0.325796	0.345696	0.344342	0.318364	0.354807	0.293486	0.34292	0.360736	0.318302	0.372447	0.348223	0.349597	0.330981	0.288789	0.300847	0.29945	0.322478	0.352079	0.355739	0.351194	0.364668	0.340735	0.343279	0.342125	0.333299	0.350076	0.359731	0.311144	0.335873	0.314443	0.360054	0.35658	0.335912	0.34903	0.394614	0.327703	0.352566	0.311573	0.320931
ARACHIDONIC_ACID_METABOLISM	0.3366	0.24324	0.235119	0.294652	0.342591	0.254786	0.325902	0.249797	0.335012	0.307716	0.28211	0.290723	0.296884	0.27203	0.279145	0.203607	0.291015	0.327031	0.260681	0.329896	0.304647	0.30673	0.295668	0.187427	0.260814	0.246055	0.302397	0.293405	0.298333	0.310743	0.307502	0.265006	0.283726	0.292635	0.291173	0.295856	0.294577	0.256752	0.266933	0.270035	0.30561	0.313979	0.281848	0.28595	0.331212	0.270341	0.292269	0.241647	0.266492
LINOLEIC_ACID_METABOLISM	0.24952	0.0992263	0.0989238	0.220585	0.251302	0.124828	0.189388	0.179713	0.242139	0.200184	0.181853	0.175586	0.182658	0.15719	0.237975	0.0591462	0.21149	0.221675	0.133454	0.261265	0.148046	0.212153	0.121239	0.0551632	0.152452	0.152122	0.195789	0.165784	0.166486	0.173344	0.260094	0.148483	0.20751	0.207	0.20295	0.181214	0.20712	0.147064	0.159676	0.18645	0.203965	0.219036	0.209585	0.184913	0.267149	0.146307	0.177695	0.144549	0.142119
ALPHA_LINOLENIC_ACID_METABOLISM	0.298124	0.213723	0.179024	0.23518	0.296007	0.190693	0.250978	0.197056	0.26331	0.243497	0.170598	0.21839	0.223126	0.189218	0.230132	0.172383	0.238676	0.2604	0.235478	0.266127	0.237876	0.23749	0.222029	0.155057	0.183044	0.158324	0.220045	0.25076	0.247201	0.25774	0.273721	0.215029	0.23197	0.22544	0.223639	0.241954	0.241306	0.170986	0.219802	0.205405	0.257456	0.258309	0.226891	0.22975	0.290263	0.208859	0.241392	0.190318	0.182504
SPHINGOLIPID_METABOLISM	0.462598	0.448794	0.446093	0.440094	0.457022	0.389304	0.435873	0.438155	0.464704	0.466943	0.444155	0.450289	0.441316	0.419789	0.430309	0.393983	0.458486	0.445232	0.419823	0.478878	0.445567	0.454303	0.437183	0.40775	0.421949	0.436826	0.440761	0.433186	0.448983	0.432811	0.44319	0.459264	0.466625	0.443559	0.433389	0.442627	0.470614	0.457619	0.447945	0.428126	0.444403	0.451167	0.434534	0.463777	0.464063	0.44389	0.443923	0.430961	0.437979
GLYCOSPHINGOLIPID_BIOSYNTHESIS_LACTO_AND_NEOLACTO_SERIES	0.374987	0.316947	0.347287	0.369463	0.35621	0.320334	0.358486	0.290366	0.379974	0.318008	0.386541	0.363643	0.383043	0.360475	0.294708	0.310102	0.352952	0.366822	0.327282	0.370162	0.367005	0.361023	0.382295	0.312534	0.323866	0.304641	0.368376	0.32852	0.357364	0.335291	0.356502	0.329546	0.359038	0.378658	0.341649	0.361114	0.372458	0.408014	0.313027	0.309646	0.389728	0.36474	0.375565	0.357921	0.370686	0.34512	0.36414	0.329224	0.330121
GLYCOSPHINGOLIPID_BIOSYNTHESIS_GLOBO_SERIES	0.448124	0.353337	0.425945	0.391014	0.408421	0.3905	0.406673	0.371132	0.467515	0.403089	0.473678	0.438073	0.449334	0.394999	0.33348	0.361365	0.36881	0.442767	0.384969	0.425834	0.434782	0.414547	0.449587	0.373133	0.375384	0.388853	0.42579	0.395348	0.418311	0.404205	0.414827	0.43604	0.402064	0.415373	0.38732	0.431658	0.418016	0.432376	0.363323	0.342202	0.446222	0.389466	0.389409	0.402394	0.426502	0.405246	0.398453	0.377156	0.427059
GLYCOSPHINGOLIPID_BIOSYNTHESIS_GANGLIO_SERIES	0.39537	0.361172	0.35608	0.335849	0.377267	0.396463	0.341584	0.347745	0.414905	0.372786	0.386749	0.373419	0.40617	0.338758	0.309255	0.359094	0.347294	0.40407	0.369738	0.371019	0.414255	0.343364	0.394702	0.37264	0.333702	0.396564	0.374912	0.364954	0.397287	0.387277	0.356389	0.400854	0.324822	0.367368	0.328818	0.427211	0.372776	0.37869	0.354909	0.334873	0.401773	0.367177	0.333344	0.367072	0.358302	0.356092	0.381979	0.351375	0.382554
RIBOFLAVIN_METABOLISM	0.366826	0.36704	0.365546	0.370074	0.376301	0.374061	0.363454	0.385409	0.376329	0.385469	0.37954	0.400045	0.375738	0.388669	0.380359	0.373066	0.382233	0.386034	0.366802	0.386255	0.391278	0.383347	0.400652	0.37877	0.437925	0.406004	0.379281	0.363777	0.390995	0.361142	0.360717	0.377652	0.396479	0.371581	0.377645	0.390015	0.379081	0.381664	0.398099	0.351015	0.392871	0.396702	0.378551	0.358424	0.385284	0.38135	0.369649	0.401614	0.395783
NICOTINATE_AND_NICOTINAMIDE_METABOLISM	0.382021	0.350888	0.378791	0.361658	0.401359	0.395629	0.380351	0.356185	0.38627	0.398469	0.387598	0.389504	0.386275	0.380234	0.371108	0.309769	0.366549	0.394421	0.363586	0.413036	0.41005	0.39049	0.411682	0.360458	0.395348	0.419435	0.369084	0.365217	0.409059	0.368775	0.354333	0.394131	0.380456	0.390855	0.383219	0.412572	0.388659	0.36136	0.38675	0.364268	0.398554	0.378966	0.340324	0.371758	0.39116	0.389392	0.377752	0.353741	0.399948
PANTOTHENATE_AND_COA_BIOSYNTHESIS	0.356597	0.335753	0.305484	0.360196	0.38308	0.329946	0.324293	0.360213	0.359387	0.379142	0.362795	0.362734	0.368355	0.353058	0.361641	0.320189	0.363416	0.378841	0.325715	0.400403	0.36624	0.354938	0.412209	0.306587	0.373265	0.33983	0.364969	0.329305	0.378272	0.338847	0.338177	0.371314	0.38579	0.365716	0.362793	0.356325	0.393091	0.352742	0.369887	0.361653	0.373789	0.348516	0.339102	0.345893	0.356437	0.376491	0.354431	0.363005	0.366515
AMINOACYL_TRNA_BIOSYNTHESIS	0.49251	0.521721	0.504152	0.524324	0.489006	0.485751	0.479008	0.531494	0.501635	0.488407	0.504328	0.495769	0.489629	0.495137	0.513292	0.52054	0.513998	0.486605	0.50879	0.494536	0.493264	0.515278	0.496081	0.508451	0.497862	0.510457	0.497412	0.498443	0.507506	0.474702	0.479441	0.496031	0.49109	0.50599	0.526157	0.490572	0.523413	0.51795	0.5134	0.502478	0.51389	0.511368	0.506597	0.501128	0.500666	0.526558	0.49479	0.505444	0.506349
BASAL_TRANSCRIPTION_FACTORS	0.401504	0.423409	0.409583	0.417448	0.401659	0.429092	0.405769	0.424916	0.415481	0.406781	0.4165	0.407282	0.406274	0.403455	0.42972	0.42705	0.418508	0.408714	0.408654	0.402521	0.420487	0.399262	0.393319	0.431257	0.406522	0.407789	0.413015	0.413636	0.416225	0.392524	0.405836	0.399327	0.400891	0.41252	0.442549	0.402451	0.43346	0.415058	0.418658	0.419396	0.408124	0.412215	0.427515	0.416251	0.395207	0.417016	0.406862	0.419644	0.403718
NON_HOMOLOGOUS_END_JOINING	0.414751	0.433571	0.428874	0.44675	0.41298	0.420072	0.40145	0.450151	0.418	0.424412	0.428486	0.4217	0.42065	0.436045	0.459761	0.414041	0.442416	0.416146	0.416202	0.434042	0.431374	0.430452	0.415402	0.468894	0.431544	0.415316	0.421317	0.426441	0.418501	0.410336	0.406932	0.428886	0.439967	0.43559	0.439199	0.398845	0.43638	0.427278	0.428136	0.430648	0.440541	0.435956	0.436287	0.440209	0.429739	0.435269	0.40422	0.426351	0.441074
SNARE_INTERACTIONS_IN_VESICULAR_TRANSPORT	0.470523	0.451139	0.453545	0.462192	0.471584	0.479855	0.465499	0.463486	0.468389	0.456814	0.486237	0.465718	0.475527	0.473441	0.47715	0.43422	0.482468	0.463879	0.457456	0.47789	0.474758	0.436666	0.471993	0.471971	0.46788	0.487508	0.469842	0.467933	0.463812	0.465594	0.459859	0.473859	0.457901	0.477182	0.478627	0.466553	0.474285	0.472495	0.473496	0.466099	0.476251	0.467213	0.462038	0.484249	0.475822	0.459343	0.464706	0.476526	0.469963
LYSOSOME	0.508166	0.490792	0.483525	0.481668	0.504582	0.478457	0.483412	0.492617	0.507642	0.492662	0.502896	0.499983	0.502612	0.48337	0.488995	0.475785	0.493651	0.506802	0.484238	0.501383	0.50703	0.48468	0.507805	0.479772	0.47145	0.493706	0.506302	0.484575	0.489901	0.487715	0.488539	0.503872	0.482529	0.491513	0.48467	0.502266	0.498426	0.500917	0.489824	0.4896	0.508927	0.483663	0.478403	0.514884	0.490242	0.495123	0.491174	0.48346	0.492567
CARDIAC_MUSCLE_CONTRACTION	0.337864	0.309873	0.313668	0.315315	0.351821	0.376718	0.359128	0.29581	0.359414	0.33375	0.340965	0.331273	0.322092	0.331917	0.314167	0.324584	0.312673	0.349601	0.325021	0.326173	0.371076	0.32369	0.373118	0.30468	0.356453	0.342362	0.330309	0.354395	0.350049	0.31446	0.343692	0.327184	0.313369	0.337565	0.305346	0.361392	0.325812	0.323232	0.328788	0.322528	0.342381	0.309418	0.328128	0.309281	0.3199	0.321579	0.326988	0.332272	0.320526
RENIN_ANGIOTENSIN_SYSTEM	0.337173	0.178573	0.2768	0.266718	0.398614	0.328118	0.285227	0.274716	0.344775	0.313045	0.312285	0.303792	0.257337	0.307024	0.257773	0.241939	0.276466	0.316687	0.275621	0.365147	0.385695	0.293205	0.334283	0.204076	0.344936	0.306565	0.27908	0.288361	0.378959	0.308571	0.246633	0.289665	0.268532	0.300333	0.300001	0.35934	0.323306	0.274297	0.331293	0.283674	0.35316	0.279018	0.276058	0.283255	0.301773	0.301219	0.32082	0.242383	0.244443
CIRCADIAN_RHYTHM_MAMMAL	0.492409	0.471438	0.4933	0.468169	0.485192	0.510379	0.496371	0.467277	0.471885	0.50108	0.494471	0.498886	0.481528	0.466379	0.487668	0.441489	0.503955	0.513188	0.472642	0.478824	0.506265	0.457554	0.471986	0.498151	0.449746	0.477772	0.526114	0.519885	0.504886	0.494607	0.504399	0.499769	0.517559	0.46473	0.458564	0.492891	0.463696	0.484303	0.481602	0.491557	0.459473	0.498929	0.507328	0.498528	0.509223	0.481236	0.48347	0.448536	0.492237
TASTE_TRANSDUCTION	0.0399985	0.0636518	0.0510108	0.0222941	0.0451041	0.0448719	0.0306234	0.0149625	0.0825135	0.0430562	0.0472306	0.0743648	0.0382148	0.0431126	0.0454386	-0.006389	0.0516365	0.0282122	0.0236262	0.0426645	-8.12277e-05	0.0289513	0.0225843	0.00976579	0.0952499	-0.0225566	0.0740112	0.0775691	0.0688505	0.0849527	-0.00258462	0.0590716	0.0678664	0.0647468	0.0137806	0.0339046	0.0269226	0.00603258	0.00533524	0.0363963	0.0584264	0.0755245	0.0227421	0.0674265	0.0674763	0.0556924	0.0913943	-0.0284255	0.0619616
PROXIMAL_TUBULE_BICARBONATE_RECLAMATION	0.392807	0.351179	0.348193	0.358794	0.377099	0.350831	0.331216	0.297932	0.395666	0.379302	0.357685	0.337568	0.305695	0.321157	0.323177	0.298483	0.350046	0.38699	0.349893	0.394465	0.395404	0.362765	0.381189	0.276898	0.394267	0.395236	0.362619	0.392991	0.345819	0.315593	0.368514	0.34463	0.295978	0.373276	0.355832	0.390021	0.37181	0.361844	0.355854	0.340555	0.381628	0.330924	0.343333	0.297107	0.370323	0.374628	0.315562	0.290722	0.371786
PATHOGENIC_ESCHERICHIA_COLI_INFECTION	0.475704	0.436938	0.464698	0.469123	0.473861	0.471661	0.469854	0.461551	0.494534	0.47364	0.476925	0.486537	0.482753	0.460019	0.480494	0.468965	0.453543	0.469445	0.481106	0.485493	0.502606	0.471648	0.479938	0.462428	0.472529	0.460803	0.471312	0.469224	0.481375	0.467739	0.459982	0.47455	0.467262	0.476566	0.467951	0.484	0.487408	0.465446	0.476148	0.470678	0.488739	0.477357	0.460285	0.462233	0.473931	0.487805	0.466772	0.465552	0.479893
SYSTEMIC_LUPUS_ERYTHEMATOSUS	0.309546	0.203572	0.281813	0.30652	0.266946	0.218844	0.31682	0.301283	0.353572	0.24131	0.266578	0.314791	0.23604	0.239553	0.275002	0.27533	0.285516	0.279466	0.285608	0.318557	0.298664	0.303645	0.370769	0.250212	0.245393	0.226707	0.245353	0.27974	0.274853	0.25698	0.306451	0.293567	0.275225	0.311339	0.282749	0.30398	0.292304	0.285349	0.287593	0.262741	0.313196	0.288459	0.311931	0.294259	0.244379	0.350153	0.286126	0.319886	0.288825
PRIMARY_IMMUNODEFICIENCY	0.427097	0.21061	0.280852	0.318355	0.328971	0.34069	0.315383	0.390205	0.423165	0.345498	0.352205	0.435316	0.300574	0.346845	0.318688	0.234293	0.290575	0.354541	0.30998	0.473726	0.379803	0.337306	0.33662	0.278135	0.29038	0.251099	0.318261	0.295044	0.332625	0.459976	0.285872	0.450881	0.31228	0.415757	0.361908	0.401242	0.339586	0.35334	0.320714	0.324477	0.401658	0.310868	0.338867	0.378224	0.35714	0.397138	0.38601	0.322221	0.431165
HYPERTROPHIC_CARDIOMYOPATHY_HCM	0.321257	0.276552	0.298431	0.279538	0.350059	0.375048	0.333386	0.259302	0.335659	0.335828	0.333828	0.327997	0.319375	0.299493	0.273495	0.268	0.27791	0.341486	0.28667	0.296923	0.360566	0.27215	0.35655	0.286208	0.301258	0.305292	0.30948	0.325938	0.354422	0.302582	0.296335	0.328728	0.26097	0.313085	0.277147	0.362039	0.303594	0.316405	0.312186	0.29284	0.334894	0.287948	0.293096	0.271495	0.31148	0.300666	0.32044	0.295472	0.300622
ARRHYTHMOGENIC_RIGHT_VENTRICULAR_CARDIOMYOPATHY_ARVC	0.362897	0.333454	0.338518	0.318958	0.384881	0.40781	0.367201	0.307749	0.37048	0.36713	0.368223	0.372142	0.358197	0.337643	0.313633	0.308708	0.312744	0.369598	0.328662	0.333472	0.405614	0.305349	0.39029	0.332868	0.342355	0.355509	0.336271	0.362859	0.391763	0.35079	0.311298	0.372112	0.293521	0.341047	0.316411	0.396627	0.338623	0.340838	0.37035	0.326465	0.357605	0.326276	0.331379	0.30569	0.351421	0.344418	0.350159	0.327982	0.342251
DILATED_CARDIOMYOPATHY	0.324958	0.270999	0.298006	0.276653	0.347481	0.37009	0.33288	0.266293	0.331846	0.330274	0.329614	0.331842	0.311433	0.302451	0.266817	0.256837	0.278275	0.338335	0.280272	0.292406	0.359362	0.264442	0.3588	0.28088	0.301227	0.303949	0.299401	0.32167	0.353156	0.308211	0.286185	0.340493	0.247315	0.314161	0.264068	0.363149	0.296068	0.298063	0.30772	0.286286	0.323261	0.289103	0.290899	0.271412	0.307716	0.3037	0.318452	0.295124	0.300647
GLYCOLYSIS_GLUCONEOGENESIS	0.43282	0.393259	0.385281	0.402693	0.426997	0.390124	0.401848	0.377129	0.42749	0.380927	0.413283	0.412038	0.395647	0.401346	0.412315	0.36027	0.406263	0.40693	0.37624	0.444624	0.403833	0.42636	0.404653	0.338549	0.387392	0.410063	0.419016	0.412107	0.411024	0.400215	0.413074	0.397427	0.404287	0.408345	0.419106	0.421461	0.42574	0.411501	0.385899	0.39837	0.421216	0.413263	0.395179	0.397571	0.442837	0.414844	0.395629	0.373658	0.412295
CITRATE_CYCLE_TCA_CYCLE	0.514879	0.524096	0.498915	0.521214	0.518621	0.498405	0.467816	0.491382	0.516067	0.512573	0.489427	0.470786	0.486403	0.485157	0.501895	0.514056	0.504351	0.500764	0.490804	0.521389	0.494467	0.526109	0.505205	0.466129	0.506809	0.519509	0.508096	0.507991	0.510962	0.47544	0.495703	0.48331	0.495657	0.490186	0.52873	0.503248	0.532929	0.500329	0.49754	0.499213	0.503768	0.506868	0.500815	0.503498	0.512227	0.53254	0.495609	0.47194	0.502309
PENTOSE_PHOSPHATE_PATHWAY	0.449378	0.445422	0.425954	0.461611	0.435779	0.410938	0.429032	0.415461	0.486405	0.445584	0.433195	0.448768	0.44142	0.436405	0.441478	0.441043	0.456431	0.451347	0.43927	0.456196	0.435276	0.463528	0.457178	0.407453	0.44046	0.453748	0.454694	0.454201	0.440451	0.431665	0.441112	0.423193	0.450959	0.44817	0.454811	0.459373	0.458303	0.462641	0.440873	0.461534	0.433313	0.449299	0.454395	0.445319	0.455961	0.438568	0.433896	0.407171	0.462332
PENTOSE_AND_GLUCURONATE_INTERCONVERSIONS	0.133233	0.0270629	0.208185	0.184887	0.162729	0.0342991	0.18786	0.0990281	0.332382	0.148965	0.14601	0.129515	0.164309	0.0874332	0.186921	0.0498527	0.185043	0.236477	0.0205523	0.260947	0.205346	0.268606	0.154284	-0.0572702	0.179344	0.158346	0.170562	0.0809506	0.152408	0.120409	0.153615	0.0573095	0.186712	0.181855	0.207064	0.120994	0.184958	0.147255	0.0262587	0.180954	0.102054	0.221013	0.179767	0.228749	0.221259	0.194142	0.215707	-0.0167862	0.154487
FRUCTOSE_AND_MANNOSE_METABOLISM	0.468747	0.447161	0.424738	0.487678	0.472725	0.411231	0.424903	0.447161	0.473601	0.433078	0.462586	0.451971	0.460814	0.430109	0.470291	0.429442	0.460364	0.46128	0.437688	0.479153	0.456972	0.472514	0.473796	0.420659	0.42256	0.465485	0.465665	0.438427	0.437323	0.42444	0.457814	0.448949	0.447849	0.469446	0.47202	0.4648	0.497622	0.47368	0.444733	0.467906	0.468545	0.471187	0.476012	0.467555	0.481182	0.461186	0.465869	0.427785	0.482714
GALACTOSE_METABOLISM	0.410125	0.385696	0.348599	0.390606	0.394625	0.352189	0.37308	0.401814	0.414842	0.373977	0.383564	0.376859	0.398835	0.355486	0.378151	0.390539	0.379191	0.37827	0.365977	0.415303	0.396274	0.409349	0.414465	0.374897	0.383678	0.372623	0.394972	0.392034	0.379545	0.35721	0.385705	0.374631	0.377439	0.384266	0.390197	0.377378	0.424816	0.403852	0.370005	0.384445	0.411298	0.372945	0.376681	0.399994	0.402627	0.395792	0.395268	0.379614	0.392337
ASCORBATE_AND_ALDARATE_METABOLISM	0.103819	-0.0238496	0.18572	0.152008	0.132396	0.00657143	0.184611	0.0341715	0.319314	0.120219	0.100317	0.0931315	0.159259	0.0362127	0.161439	-0.000484987	0.158853	0.216979	-0.0334628	0.230921	0.175217	0.233384	0.115771	-0.117781	0.145371	0.116469	0.139195	0.0551341	0.129836	0.108229	0.1247	0.0131706	0.168033	0.154432	0.164943	0.0720294	0.145271	0.0875034	-0.012749	0.153815	0.0525876	0.207529	0.138945	0.203844	0.200824	0.15609	0.181772	-0.0522466	0.115554
FATTY_ACID_METABOLISM	0.433079	0.406333	0.411711	0.407996	0.444649	0.425149	0.413894	0.401707	0.42775	0.395623	0.426184	0.437612	0.389498	0.433215	0.415478	0.366235	0.419601	0.423884	0.395339	0.463003	0.410955	0.439252	0.421252	0.344458	0.382065	0.437805	0.442837	0.405186	0.422855	0.437526	0.424384	0.419552	0.421216	0.430395	0.427651	0.42973	0.435196	0.422298	0.391882	0.394141	0.426078	0.421958	0.407712	0.413647	0.465064	0.433688	0.411899	0.390725	0.405857
STEROID_BIOSYNTHESIS	0.477098	0.464863	0.47418	0.463782	0.463853	0.360964	0.452566	0.453997	0.468054	0.49132	0.443975	0.451865	0.426384	0.413567	0.407992	0.502146	0.468923	0.480613	0.488325	0.445902	0.433323	0.483546	0.494218	0.471016	0.531079	0.481326	0.461225	0.503734	0.435354	0.412666	0.448831	0.433559	0.477111	0.487334	0.507212	0.429145	0.48435	0.463182	0.450505	0.442205	0.454304	0.512375	0.425518	0.466823	0.47123	0.472094	0.448411	0.419423	0.444541
PRIMARY_BILE_ACID_BIOSYNTHESIS	0.290036	0.220893	0.256181	0.176272	0.295126	0.26483	0.245942	0.23746	0.307446	0.290193	0.270493	0.243818	0.254185	0.236447	0.247981	0.246171	0.209417	0.310905	0.248938	0.298877	0.262776	0.266222	0.272017	0.178205	0.296219	0.296891	0.260514	0.249939	0.296068	0.269616	0.247903	0.262539	0.219585	0.261375	0.318149	0.305373	0.278262	0.25878	0.225483	0.206894	0.253809	0.299347	0.198297	0.243475	0.252568	0.257837	0.264298	0.184237	0.226615
STEROID_HORMONE_BIOSYNTHESIS	0.127618	0.0392455	0.153494	0.121937	0.18479	0.0457344	0.154759	0.0768638	0.2741	0.150538	0.141208	0.103575	0.13125	0.103018	0.152426	0.0368665	0.153877	0.218425	0.00625409	0.215475	0.140994	0.189318	0.134283	0.00776615	0.152222	0.129168	0.146295	0.0916472	0.139048	0.128521	0.134197	0.0660444	0.1446	0.151457	0.168792	0.147727	0.168405	0.102977	0.0477008	0.147266	0.10416	0.194162	0.124338	0.153363	0.171906	0.139811	0.15231	-0.00306473	0.133128
OXIDATIVE_PHOSPHORYLATION	0.509971	0.520715	0.500714	0.51559	0.513268	0.512486	0.527191	0.506277	0.514497	0.486806	0.519358	0.497394	0.511143	0.506282	0.509074	0.528458	0.509273	0.508979	0.524249	0.514639	0.514312	0.523873	0.515773	0.488722	0.507987	0.525478	0.51143	0.508934	0.506708	0.495506	0.531506	0.486996	0.522403	0.509174	0.516882	0.50934	0.522624	0.517214	0.51133	0.510521	0.517746	0.519939	0.518596	0.515572	0.507976	0.510625	0.513777	0.517879	0.510115
PURINE_METABOLISM	0.394826	0.379688	0.387364	0.389988	0.402915	0.3972	0.387433	0.383161	0.403223	0.385547	0.401925	0.389147	0.390737	0.386544	0.383948	0.385042	0.388363	0.394032	0.394591	0.398002	0.41303	0.389886	0.40708	0.366205	0.394645	0.398034	0.395258	0.38657	0.410796	0.373375	0.376115	0.389165	0.3809	0.398223	0.403498	0.40527	0.410599	0.39348	0.396558	0.37824	0.406515	0.394516	0.393707	0.38156	0.399304	0.393061	0.391559	0.37711	0.397718
PYRIMIDINE_METABOLISM	0.442146	0.456582	0.452215	0.457058	0.440588	0.420761	0.438586	0.466118	0.443608	0.43064	0.446212	0.442619	0.443434	0.437473	0.458972	0.456518	0.449056	0.446064	0.464984	0.446973	0.453231	0.457746	0.455491	0.452147	0.445582	0.439075	0.449797	0.430235	0.452066	0.419839	0.43679	0.441902	0.450964	0.449485	0.46091	0.440352	0.461176	0.456018	0.459094	0.455703	0.461089	0.448337	0.451627	0.447909	0.442266	0.462751	0.441446	0.46019	0.456115
ALANINE_ASPARTATE_AND_GLUTAMATE_METABOLISM	0.40557	0.361049	0.381393	0.409035	0.376739	0.339289	0.362274	0.405329	0.409819	0.388957	0.390735	0.385523	0.357489	0.368218	0.353103	0.347968	0.382194	0.404271	0.382277	0.399422	0.369883	0.398963	0.408695	0.356618	0.415183	0.399748	0.429688	0.383336	0.393716	0.356174	0.383953	0.378975	0.367575	0.36216	0.403138	0.388998	0.4169	0.403067	0.379921	0.376471	0.402096	0.397668	0.369506	0.376244	0.375328	0.386093	0.387709	0.365641	0.399438
GLYCINE_SERINE_AND_THREONINE_METABOLISM	0.31757	0.326852	0.342455	0.313251	0.316152	0.292471	0.30657	0.287118	0.377259	0.334943	0.31042	0.297897	0.303283	0.28979	0.25219	0.366356	0.280784	0.328103	0.340008	0.326468	0.323955	0.305258	0.380193	0.290799	0.326957	0.387704	0.32351	0.325443	0.309906	0.295484	0.302414	0.309338	0.28234	0.28966	0.354038	0.338726	0.320814	0.324973	0.31127	0.301651	0.339518	0.317719	0.28084	0.31073	0.313825	0.327601	0.309308	0.273576	0.320034
CYSTEINE_AND_METHIONINE_METABOLISM	0.395063	0.367389	0.371512	0.392591	0.380186	0.36471	0.366634	0.385385	0.416799	0.385528	0.398423	0.392606	0.381876	0.356282	0.384484	0.410279	0.357117	0.391239	0.389115	0.397052	0.423212	0.372752	0.408081	0.364029	0.374949	0.424725	0.39251	0.395335	0.391147	0.371358	0.392133	0.40096	0.378888	0.377083	0.395259	0.373757	0.407086	0.39487	0.409269	0.392305	0.412835	0.390554	0.366183	0.386921	0.365577	0.421366	0.394786	0.366252	0.418547
VALINE_LEUCINE_AND_ISOLEUCINE_DEGRADATION	0.471396	0.454864	0.467559	0.490101	0.481188	0.471525	0.468093	0.446354	0.478179	0.474535	0.477104	0.465144	0.458522	0.462728	0.472619	0.501345	0.465774	0.474619	0.453514	0.485437	0.461289	0.491064	0.479545	0.419076	0.459136	0.498202	0.456219	0.477936	0.477618	0.461899	0.457565	0.463388	0.46051	0.469691	0.484587	0.467625	0.509394	0.473724	0.463131	0.480635	0.467458	0.478744	0.467755	0.483289	0.480578	0.491733	0.4898	0.453124	0.474423
VALINE_LEUCINE_AND_ISOLEUCINE_BIOSYNTHESIS	0.44736	0.461229	0.438536	0.456799	0.452123	0.439628	0.412203	0.462699	0.434176	0.439454	0.449548	0.426429	0.454672	0.4332	0.448898	0.502348	0.454348	0.44558	0.436098	0.433046	0.432511	0.467548	0.46432	0.414346	0.428072	0.471635	0.448502	0.431883	0.461027	0.409507	0.416587	0.454462	0.423315	0.44327	0.475695	0.442501	0.483973	0.455725	0.469839	0.453315	0.446544	0.440423	0.440545	0.454074	0.451529	0.479414	0.452097	0.439674	0.451584
LYSINE_DEGRADATION	0.455399	0.469048	0.465529	0.481146	0.467743	0.473235	0.448674	0.456779	0.483175	0.484839	0.456705	0.451432	0.449865	0.461207	0.468716	0.481003	0.459737	0.460873	0.477077	0.462484	0.473514	0.472915	0.473365	0.451755	0.476436	0.460056	0.470852	0.461842	0.470423	0.457283	0.447744	0.460127	0.465	0.460256	0.482541	0.460349	0.477839	0.463102	0.461867	0.45996	0.465616	0.473525	0.45829	0.480973	0.468778	0.486009	0.444476	0.441814	0.47256
ARGININE_AND_PROLINE_METABOLISM	0.44217	0.396085	0.42577	0.436796	0.454126	0.390072	0.421963	0.414526	0.459243	0.430486	0.422792	0.419405	0.422052	0.429788	0.419801	0.431585	0.420156	0.418937	0.40733	0.449227	0.44166	0.456838	0.466529	0.399092	0.425793	0.460513	0.431228	0.418883	0.452828	0.421385	0.43187	0.39029	0.42506	0.421199	0.438083	0.45115	0.45642	0.433313	0.426051	0.422155	0.442323	0.438745	0.421961	0.408933	0.439443	0.434625	0.430844	0.403166	0.429149
HISTIDINE_METABOLISM	0.395371	0.340336	0.357609	0.357967	0.399038	0.358097	0.377223	0.356496	0.413406	0.38727	0.374792	0.369354	0.368174	0.393502	0.369847	0.332386	0.377485	0.370489	0.366043	0.406425	0.356172	0.388465	0.348861	0.333025	0.380123	0.374269	0.402824	0.384979	0.399305	0.371401	0.376552	0.361164	0.348281	0.3817	0.393875	0.390461	0.386793	0.371395	0.363022	0.351972	0.381519	0.39088	0.356674	0.366344	0.389998	0.392453	0.348321	0.355065	0.389084
TYROSINE_METABOLISM	0.343626	0.278904	0.314485	0.291677	0.340042	0.320237	0.336041	0.296959	0.348636	0.306991	0.336406	0.345926	0.28165	0.332683	0.307127	0.218699	0.314697	0.337858	0.299946	0.35554	0.322832	0.321403	0.329978	0.270043	0.325645	0.332694	0.323945	0.321779	0.345702	0.335211	0.328717	0.328295	0.299509	0.335583	0.304378	0.365125	0.297421	0.297981	0.306318	0.266426	0.318056	0.323712	0.296321	0.296328	0.342619	0.344766	0.309482	0.259067	0.317794
PHENYLALANINE_METABOLISM	0.412864	0.35501	0.409642	0.364345	0.408588	0.371766	0.43381	0.384722	0.440148	0.408404	0.393183	0.395403	0.384645	0.3921	0.3864	0.358842	0.38049	0.441266	0.379438	0.424562	0.392074	0.418367	0.404132	0.374069	0.387038	0.412304	0.425355	0.420361	0.419333	0.379987	0.421619	0.416194	0.36857	0.429324	0.38939	0.440961	0.356765	0.382654	0.376616	0.352039	0.390296	0.402612	0.380433	0.395558	0.39585	0.423069	0.391193	0.363718	0.421959
TRYPTOPHAN_METABOLISM	0.389979	0.302123	0.321913	0.358669	0.371736	0.351521	0.341054	0.339709	0.410069	0.365993	0.360702	0.362387	0.348426	0.348147	0.327311	0.33839	0.343382	0.372445	0.326117	0.398225	0.372845	0.382525	0.391933	0.303866	0.342441	0.371623	0.357546	0.356815	0.36897	0.376659	0.339104	0.365643	0.330416	0.373797	0.379763	0.396904	0.385313	0.352623	0.365262	0.330793	0.3747	0.367387	0.33	0.364054	0.356337	0.40881	0.363536	0.32759	0.370164
BETA_ALANINE_METABOLISM	0.381213	0.35671	0.368803	0.370018	0.392291	0.373039	0.374308	0.370693	0.372541	0.385487	0.394358	0.399542	0.360291	0.368566	0.367475	0.39322	0.355177	0.392095	0.373184	0.390281	0.367437	0.378073	0.395076	0.343313	0.371919	0.395234	0.369326	0.393408	0.416979	0.37186	0.377288	0.392598	0.366684	0.3698	0.381739	0.391113	0.408511	0.380624	0.386015	0.387016	0.370752	0.370686	0.357835	0.394234	0.37272	0.386248	0.374538	0.368809	0.391014
TAURINE_AND_HYPOTAURINE_METABOLISM	0.358292	0.275378	0.326823	0.307111	0.338317	0.303268	0.344139	0.227298	0.320872	0.325721	0.369154	0.334444	0.316935	0.260602	0.267118	0.273165	0.29997	0.446993	0.259853	0.345209	0.309335	0.304785	0.328359	0.244833	0.352475	0.296246	0.360101	0.337767	0.303287	0.321469	0.328922	0.307853	0.337347	0.312378	0.331511	0.327732	0.281772	0.306939	0.289953	0.256718	0.266175	0.328978	0.240778	0.279685	0.250854	0.273364	0.334726	0.232694	0.327225
SELENOAMINO_ACID_METABOLISM	0.451975	0.439213	0.439215	0.458295	0.441668	0.40775	0.411981	0.432151	0.464437	0.433332	0.431986	0.436575	0.434659	0.431408	0.430672	0.448359	0.446587	0.452428	0.441669	0.46431	0.472314	0.455054	0.444168	0.402651	0.437364	0.460221	0.459143	0.433174	0.432624	0.43136	0.436456	0.429861	0.445417	0.435735	0.465297	0.43435	0.45495	0.436939	0.459734	0.447744	0.460134	0.439763	0.436169	0.437037	0.441145	0.452055	0.43096	0.407939	0.466109
GLUTATHIONE_METABOLISM	0.445922	0.43284	0.433751	0.451409	0.475563	0.428836	0.45715	0.421655	0.471326	0.462988	0.445618	0.441091	0.447171	0.428517	0.456216	0.442571	0.43615	0.458727	0.438512	0.477615	0.440401	0.475744	0.444198	0.388791	0.434725	0.448516	0.448939	0.472492	0.450502	0.434458	0.467776	0.425566	0.461833	0.459963	0.441811	0.464852	0.441491	0.454469	0.435623	0.428436	0.465137	0.446564	0.438989	0.477415	0.465593	0.461506	0.436961	0.409814	0.470976
STARCH_AND_SUCROSE_METABOLISM	0.191969	0.106699	0.175608	0.185324	0.223517	0.124228	0.193902	0.132582	0.287732	0.178124	0.174056	0.174988	0.198844	0.132003	0.187931	0.0782379	0.190742	0.234435	0.0869356	0.272464	0.215077	0.251298	0.209278	0.0453684	0.194683	0.182143	0.165363	0.144147	0.19072	0.165159	0.174458	0.128655	0.20541	0.195029	0.184685	0.160119	0.220941	0.174615	0.111264	0.18872	0.15929	0.223578	0.174264	0.210852	0.246358	0.217026	0.211469	0.0844814	0.184689
AMINO_SUGAR_AND_NUCLEOTIDE_SUGAR_METABOLISM	0.462805	0.454896	0.443641	0.455513	0.458666	0.412846	0.447263	0.448369	0.474459	0.426775	0.472749	0.44024	0.466608	0.417453	0.438287	0.447842	0.450153	0.465706	0.44742	0.453919	0.464869	0.454455	0.465793	0.433587	0.435672	0.463254	0.46025	0.44008	0.437033	0.419876	0.455878	0.446324	0.441125	0.446726	0.465605	0.446656	0.478562	0.467594	0.440369	0.442461	0.464411	0.464954	0.436313	0.472362	0.439072	0.457153	0.453596	0.451515	0.469224
GLYCOSAMINOGLYCAN_BIOSYNTHESIS_CHONDROITIN_SULFATE	0.427977	0.386519	0.410274	0.387687	0.388674	0.430313	0.381721	0.372713	0.447608	0.435816	0.416543	0.408242	0.428903	0.373972	0.356081	0.393976	0.371104	0.41991	0.414517	0.381512	0.443832	0.377327	0.426221	0.406051	0.385324	0.394461	0.426697	0.413911	0.442039	0.427155	0.392767	0.43322	0.351359	0.40348	0.366219	0.447339	0.403218	0.374295	0.394771	0.383215	0.446418	0.384361	0.370397	0.425092	0.386773	0.405508	0.402327	0.377061	0.406766
GLYCOSAMINOGLYCAN_BIOSYNTHESIS_HEPARAN_SULFATE	0.313923	0.283421	0.274997	0.303139	0.306566	0.327073	0.310631	0.305905	0.340594	0.344644	0.358373	0.300673	0.328359	0.247128	0.27025	0.237979	0.281318	0.343179	0.314452	0.288708	0.35252	0.253939	0.349063	0.288807	0.289461	0.307862	0.324386	0.300685	0.333504	0.293022	0.293341	0.313665	0.269282	0.309532	0.275936	0.347908	0.2981	0.313967	0.309753	0.289197	0.355755	0.294738	0.287302	0.31989	0.289256	0.317991	0.302794	0.265205	0.29305
INOSITOL_PHOSPHATE_METABOLISM	0.449714	0.417043	0.437615	0.459287	0.452543	0.458544	0.44357	0.454203	0.451256	0.461272	0.456509	0.461757	0.437841	0.452139	0.452084	0.415208	0.449339	0.451134	0.417392	0.462429	0.450394	0.439958	0.440486	0.437941	0.442473	0.432018	0.45672	0.428955	0.465123	0.448486	0.426639	0.463589	0.453149	0.449895	0.43983	0.437147	0.445424	0.449008	0.435917	0.441164	0.449883	0.448548	0.454258	0.464077	0.465585	0.452904	0.433596	0.42811	0.450356
PYRUVATE_METABOLISM	0.441208	0.438302	0.409301	0.441539	0.442207	0.417233	0.413249	0.389614	0.438943	0.422284	0.417942	0.398399	0.417394	0.408404	0.422126	0.44559	0.426284	0.427374	0.413386	0.446103	0.427855	0.437074	0.420065	0.390442	0.403623	0.437756	0.422418	0.439905	0.421778	0.401483	0.425083	0.412011	0.434838	0.410121	0.452014	0.421781	0.467096	0.423813	0.426037	0.434316	0.433191	0.444355	0.42901	0.433201	0.446591	0.444785	0.421873	0.392701	0.425626
GLYOXYLATE_AND_DICARBOXYLATE_METABOLISM	0.424103	0.474729	0.450104	0.454385	0.420596	0.400984	0.392348	0.441486	0.464415	0.422047	0.419382	0.41391	0.419586	0.412601	0.430098	0.473089	0.430064	0.420946	0.438995	0.423406	0.416988	0.432539	0.431352	0.428517	0.424189	0.485729	0.417991	0.424648	0.421261	0.393366	0.421519	0.416421	0.430614	0.434632	0.466013	0.429107	0.441485	0.441293	0.445298	0.441873	0.448883	0.436054	0.437277	0.425117	0.41809	0.463227	0.432177	0.431878	0.434487
PROPANOATE_METABOLISM	0.440575	0.449815	0.428496	0.45768	0.450481	0.451896	0.428082	0.413343	0.438761	0.45208	0.45525	0.42548	0.43114	0.440001	0.435437	0.464816	0.433239	0.439127	0.428017	0.451315	0.42753	0.45323	0.436155	0.390946	0.410988	0.474885	0.428125	0.44331	0.443221	0.433257	0.432335	0.431382	0.44948	0.442807	0.455995	0.431105	0.473981	0.458345	0.436236	0.436002	0.443034	0.461138	0.431845	0.457481	0.455464	0.453301	0.44818	0.408057	0.448854
BUTANOATE_METABOLISM	0.381741	0.360184	0.367884	0.39977	0.391828	0.348162	0.372725	0.351647	0.38759	0.376151	0.402817	0.384338	0.351238	0.363447	0.389284	0.404224	0.364459	0.387387	0.340651	0.393686	0.359636	0.413237	0.379116	0.310188	0.354826	0.404812	0.374787	0.383524	0.375965	0.348474	0.381462	0.381916	0.364272	0.379991	0.400193	0.376671	0.415725	0.388978	0.368478	0.377213	0.374749	0.390794	0.381771	0.403719	0.392521	0.404358	0.379327	0.348836	0.395762
ONE_CARBON_POOL_BY_FOLATE	0.403493	0.412909	0.421025	0.456614	0.387787	0.388751	0.389688	0.453728	0.419175	0.405709	0.424789	0.39975	0.411367	0.417326	0.404145	0.465212	0.402249	0.392168	0.440848	0.407695	0.403741	0.4279	0.400069	0.433186	0.470599	0.403081	0.411644	0.406289	0.421829	0.372204	0.429933	0.412804	0.433122	0.383316	0.432992	0.399035	0.431715	0.398101	0.428985	0.413632	0.439862	0.413551	0.405876	0.414507	0.399305	0.438655	0.395333	0.416909	0.43762
FOLATE_BIOSYNTHESIS	0.447869	0.35305	0.367175	0.391207	0.388519	0.291382	0.37372	0.379087	0.479927	0.492523	0.377816	0.397174	0.407972	0.382492	0.392183	0.39401	0.474242	0.436101	0.391933	0.393159	0.400732	0.440017	0.419831	0.376371	0.4059	0.335973	0.459958	0.390114	0.483999	0.340494	0.488839	0.3412	0.439018	0.320968	0.428975	0.422189	0.430152	0.344846	0.351713	0.451215	0.477814	0.438538	0.472881	0.389972	0.449551	0.333685	0.405976	0.416764	0.409283
RETINOL_METABOLISM	0.158896	0.0210503	0.120333	0.159001	0.167256	0.0776317	0.16444	0.0961506	0.258655	0.130059	0.13458	0.130666	0.124491	0.100794	0.192988	-5.13662e-05	0.172418	0.200743	0.01946	0.235593	0.13788	0.203605	0.11493	-0.0348864	0.138921	0.136391	0.184095	0.0999876	0.120553	0.113976	0.152835	0.0679363	0.148464	0.170941	0.161297	0.142185	0.146695	0.114338	0.0476819	0.125062	0.122836	0.171921	0.145079	0.180643	0.218993	0.166257	0.145482	0.0466804	0.12936
PORPHYRIN_AND_CHLOROPHYLL_METABOLISM	0.24412	0.172532	0.274931	0.262346	0.265739	0.185153	0.272452	0.220385	0.367841	0.246689	0.248845	0.239589	0.267716	0.208742	0.270869	0.209184	0.265785	0.299279	0.17031	0.317953	0.282886	0.319805	0.265642	0.109186	0.263495	0.269627	0.249497	0.198903	0.256908	0.231933	0.241708	0.196109	0.277724	0.274404	0.288646	0.221688	0.279247	0.259775	0.181616	0.266399	0.225085	0.286912	0.258669	0.299464	0.284856	0.281803	0.291062	0.164118	0.248332
TERPENOID_BACKBONE_BIOSYNTHESIS	0.437845	0.440994	0.482494	0.488032	0.442788	0.406921	0.466119	0.421459	0.475207	0.442472	0.454286	0.457507	0.438841	0.434135	0.457227	0.511012	0.493703	0.472132	0.433963	0.457086	0.443107	0.48503	0.471033	0.432313	0.461002	0.469721	0.458474	0.460027	0.449126	0.410313	0.450271	0.421681	0.49255	0.469266	0.493909	0.433872	0.498638	0.444002	0.447454	0.477526	0.45193	0.488613	0.460835	0.462854	0.48096	0.47072	0.475492	0.433724	0.459144
LIMONENE_AND_PINENE_DEGRADATION	0.507781	0.527345	0.519267	0.531981	0.518625	0.516437	0.53715	0.494922	0.51525	0.503816	0.524284	0.515373	0.497128	0.521713	0.513677	0.542856	0.508737	0.51018	0.507783	0.51838	0.500542	0.542651	0.487838	0.477278	0.478519	0.532982	0.522435	0.518793	0.517304	0.504227	0.54718	0.518659	0.510876	0.536066	0.524878	0.5067	0.54408	0.546071	0.530419	0.538072	0.520992	0.528171	0.539396	0.522906	0.534961	0.525893	0.536955	0.528545	0.513898
NITROGEN_METABOLISM	0.298803	0.296216	0.238205	0.345905	0.305374	0.248363	0.258826	0.296364	0.331667	0.315577	0.295652	0.272943	0.275202	0.290055	0.272215	0.242374	0.365458	0.299581	0.327097	0.329502	0.311405	0.31142	0.320558	0.269665	0.256065	0.269354	0.287569	0.268092	0.301583	0.233883	0.367485	0.254839	0.32236	0.309899	0.334538	0.308785	0.319419	0.332141	0.29	0.278715	0.325557	0.294002	0.309335	0.275683	0.326852	0.274925	0.300435	0.229967	0.324823
SULFUR_METABOLISM	0.336877	0.348645	0.299414	0.330081	0.355858	0.234219	0.311336	0.342294	0.439239	0.34694	0.332248	0.326782	0.27544	0.299154	0.35264	0.333817	0.298402	0.324418	0.301264	0.3803	0.275662	0.359036	0.334352	0.264878	0.337715	0.208077	0.354864	0.313336	0.324874	0.350715	0.324098	0.303296	0.273983	0.296395	0.293937	0.331207	0.37637	0.29963	0.313862	0.374057	0.338784	0.350908	0.332016	0.333476	0.352168	0.280356	0.323068	0.300401	0.344208
METABOLISM_OF_XENOBIOTICS_BY_CYTOCHROME_P450	0.216323	0.103679	0.22759	0.228415	0.265437	0.163079	0.253402	0.169881	0.322616	0.22239	0.22707	0.219272	0.203061	0.200253	0.261649	0.0938923	0.240437	0.272799	0.0999767	0.327509	0.203689	0.298577	0.183187	0.0469577	0.214864	0.234376	0.250081	0.184424	0.216469	0.201495	0.253077	0.150677	0.222642	0.270481	0.246787	0.245728	0.216569	0.214224	0.126457	0.209148	0.214226	0.257417	0.215956	0.269536	0.293951	0.235641	0.218266	0.102701	0.226757
DRUG_METABOLISM_CYTOCHROME_P450	0.215477	0.0876474	0.200755	0.213918	0.26267	0.167207	0.245281	0.163919	0.322542	0.220671	0.210383	0.216469	0.203599	0.190543	0.256106	0.0791866	0.217572	0.256074	0.0982943	0.302511	0.191823	0.280729	0.173077	0.0325051	0.201694	0.227318	0.226552	0.200362	0.211696	0.200203	0.238082	0.155352	0.207403	0.249382	0.208679	0.229472	0.206358	0.205288	0.119678	0.187481	0.194536	0.233836	0.196615	0.259912	0.282576	0.2428	0.203736	0.099976	0.204064
DRUG_METABOLISM_OTHER_ENZYMES	0.216652	0.109689	0.238199	0.228062	0.259518	0.132682	0.214022	0.182428	0.331274	0.230685	0.193279	0.20886	0.221899	0.183138	0.268868	0.142686	0.233498	0.279242	0.115929	0.286551	0.238834	0.271788	0.209748	0.0963078	0.222868	0.203323	0.225394	0.196348	0.233161	0.195948	0.198748	0.152093	0.25151	0.225201	0.242478	0.197189	0.240871	0.19368	0.165675	0.239435	0.160127	0.26572	0.227912	0.261814	0.263452	0.240018	0.245256	0.133872	0.209812
BIOSYNTHESIS_OF_UNSATURATED_FATTY_ACIDS	0.445682	0.455603	0.417611	0.421361	0.45482	0.452805	0.438205	0.436821	0.459035	0.435218	0.453332	0.427833	0.429851	0.407351	0.432746	0.483464	0.403194	0.47684	0.4496	0.460382	0.434745	0.449282	0.455591	0.42388	0.428704	0.467992	0.472636	0.445759	0.439955	0.397601	0.410125	0.440686	0.418166	0.463384	0.460111	0.453793	0.448453	0.456636	0.444376	0.423909	0.458145	0.419043	0.41031	0.431179	0.414688	0.437141	0.45406	0.429698	0.457545
ABC_TRANSPORTERS	0.312469	0.263171	0.270212	0.251989	0.329789	0.301349	0.25498	0.267122	0.332454	0.314358	0.311718	0.304609	0.298215	0.286163	0.257473	0.195906	0.30739	0.289583	0.264418	0.325268	0.310774	0.259341	0.307732	0.264602	0.267109	0.303781	0.282678	0.265324	0.334114	0.304418	0.247436	0.30689	0.267451	0.328295	0.291553	0.316571	0.296165	0.286467	0.250377	0.216289	0.311828	0.287279	0.270287	0.284885	0.311044	0.282806	0.2616	0.23997	0.302302
RIBOSOME	0.588371	0.592514	0.590464	0.588793	0.595892	0.588328	0.591518	0.601651	0.588028	0.57412	0.586955	0.589898	0.59272	0.596664	0.599831	0.592842	0.588985	0.590895	0.598545	0.597872	0.585803	0.588982	0.586498	0.585206	0.590924	0.602868	0.583466	0.589401	0.58696	0.592833	0.593479	0.58749	0.584191	0.596	0.593375	0.593294	0.589468	0.595907	0.602813	0.594003	0.585344	0.598227	0.588619	0.584758	0.590082	0.597901	0.59561	0.592329	0.594654
RNA_DEGRADATION	0.457178	0.484024	0.464617	0.485154	0.457322	0.468631	0.454418	0.48619	0.467069	0.450525	0.47768	0.467453	0.461254	0.469105	0.490433	0.480061	0.473727	0.451211	0.479355	0.470996	0.455786	0.480395	0.45488	0.474987	0.474671	0.473342	0.471736	0.4698	0.471232	0.457303	0.466139	0.464414	0.47159	0.4648	0.49836	0.442813	0.488416	0.470145	0.48179	0.48273	0.468965	0.466856	0.478296	0.462025	0.46061	0.478123	0.462962	0.484529	0.476423
RNA_POLYMERASE	0.446702	0.480598	0.459047	0.479868	0.452029	0.449315	0.452108	0.486503	0.446443	0.432703	0.457409	0.447395	0.450778	0.443931	0.46957	0.475952	0.45237	0.439145	0.483219	0.44117	0.448304	0.461661	0.446272	0.466735	0.460757	0.460968	0.447508	0.443614	0.463757	0.441772	0.45362	0.446158	0.445849	0.45875	0.480965	0.446032	0.469763	0.462534	0.466673	0.467883	0.460029	0.461523	0.461691	0.438962	0.441439	0.471207	0.454771	0.465729	0.459618
DNA_REPLICATION	0.474619	0.471215	0.497948	0.517121	0.458481	0.426543	0.452047	0.515616	0.488	0.454106	0.463913	0.483803	0.468093	0.492447	0.503857	0.518306	0.483382	0.472385	0.516851	0.486364	0.49937	0.515128	0.495255	0.505539	0.530465	0.443489	0.495034	0.479195	0.483422	0.450066	0.436258	0.494363	0.491857	0.495457	0.518549	0.45542	0.505761	0.490319	0.498824	0.49816	0.509841	0.48907	0.501162	0.49836	0.467364	0.52652	0.47416	0.492631	0.514242
SPLICEOSOME	0.523726	0.535927	0.531138	0.542537	0.524418	0.529206	0.529122	0.545521	0.526545	0.514477	0.533605	0.531003	0.526839	0.533936	0.544752	0.547648	0.534635	0.522303	0.533443	0.533337	0.522115	0.538838	0.518474	0.536292	0.533177	0.527415	0.539043	0.538444	0.532827	0.520789	0.534281	0.525524	0.539641	0.529427	0.543212	0.514521	0.542174	0.532632	0.542253	0.544467	0.533378	0.532717	0.539859	0.529991	0.522988	0.540766	0.528197	0.541804	0.537658
PROTEASOME	0.49808	0.483875	0.487805	0.498959	0.493264	0.491484	0.505959	0.517277	0.50939	0.471175	0.509838	0.507141	0.491175	0.498188	0.505135	0.5092	0.506682	0.496342	0.486451	0.509139	0.493627	0.515283	0.484029	0.503869	0.480483	0.486004	0.517026	0.492409	0.479678	0.485242	0.479025	0.498524	0.502873	0.510934	0.530453	0.495987	0.516595	0.504649	0.525102	0.513528	0.503925	0.490108	0.503946	0.51782	0.496821	0.505109	0.501719	0.520389	0.515722
PROTEIN_EXPORT	0.529638	0.553783	0.535301	0.535739	0.524159	0.532169	0.529803	0.533698	0.526893	0.512192	0.548661	0.536185	0.54123	0.531219	0.535533	0.543416	0.549793	0.533588	0.546033	0.535124	0.517134	0.547382	0.539098	0.535168	0.531431	0.562111	0.541646	0.543473	0.528767	0.521111	0.54017	0.523356	0.548181	0.530273	0.552011	0.526196	0.547361	0.545145	0.544647	0.546811	0.539084	0.53334	0.534603	0.531842	0.533332	0.537135	0.545836	0.540726	0.535352
PPAR_SIGNALING_PATHWAY	0.370656	0.300032	0.312698	0.322124	0.374598	0.308028	0.336018	0.271046	0.383103	0.368314	0.329254	0.319513	0.333583	0.322898	0.32736	0.340912	0.330523	0.37355	0.299124	0.383121	0.356303	0.357102	0.364886	0.266531	0.327598	0.350908	0.327219	0.37355	0.352909	0.318195	0.344964	0.297706	0.319744	0.305742	0.351221	0.380371	0.376163	0.321761	0.318922	0.330562	0.359206	0.363467	0.338655	0.320987	0.371242	0.332667	0.332189	0.266829	0.329419
BASE_EXCISION_REPAIR	0.464723	0.478963	0.477097	0.500345	0.450826	0.432652	0.445889	0.4843	0.475239	0.437887	0.459242	0.459077	0.456439	0.471084	0.487799	0.485725	0.472317	0.463619	0.497242	0.466794	0.466963	0.489622	0.47172	0.469146	0.480914	0.453992	0.479499	0.456632	0.462826	0.447238	0.447714	0.460946	0.477852	0.475671	0.483939	0.4521	0.484786	0.482703	0.475159	0.484203	0.486132	0.478918	0.48275	0.475203	0.464115	0.494231	0.461076	0.486453	0.481961
NUCLEOTIDE_EXCISION_REPAIR	0.449468	0.473191	0.467529	0.481665	0.448652	0.447144	0.450507	0.488757	0.464625	0.437796	0.4612	0.46651	0.460866	0.456703	0.479163	0.468263	0.468615	0.449458	0.474569	0.45959	0.461169	0.477874	0.457352	0.489373	0.468386	0.464178	0.462181	0.45873	0.466617	0.440866	0.444571	0.467768	0.472257	0.469144	0.491314	0.437293	0.48125	0.475782	0.475718	0.479964	0.471235	0.465222	0.471083	0.475136	0.454707	0.487727	0.456715	0.466141	0.468755
MISMATCH_REPAIR	0.459965	0.463654	0.479069	0.489095	0.449887	0.421616	0.436629	0.504278	0.473416	0.43465	0.4631	0.47171	0.460936	0.478804	0.491731	0.489135	0.473004	0.455724	0.502123	0.473389	0.47747	0.491683	0.474408	0.484813	0.514691	0.457244	0.476341	0.461279	0.468274	0.436683	0.432493	0.477558	0.480205	0.483946	0.504173	0.435163	0.488872	0.485496	0.481079	0.471266	0.487896	0.461953	0.485132	0.484813	0.462593	0.504808	0.452112	0.457893	0.492622
HOMOLOGOUS_RECOMBINATION	0.388392	0.390475	0.413565	0.442952	0.378218	0.344882	0.36341	0.440937	0.412572	0.374914	0.385878	0.39352	0.392059	0.40974	0.428524	0.414767	0.417154	0.39265	0.434826	0.39928	0.413366	0.430773	0.396815	0.431146	0.429534	0.345327	0.412717	0.394457	0.401	0.369608	0.35697	0.405016	0.419338	0.409013	0.441165	0.363485	0.431454	0.39832	0.411106	0.417839	0.427364	0.406846	0.42723	0.418977	0.393377	0.438893	0.388283	0.407457	0.431411
MAPK_SIGNALING_PATHWAY	0.384327	0.357667	0.36097	0.362337	0.388363	0.392956	0.37937	0.360989	0.391687	0.389312	0.37971	0.380719	0.379614	0.35861	0.353751	0.341662	0.354593	0.386513	0.370651	0.369674	0.405687	0.348624	0.389362	0.349993	0.356529	0.374579	0.376526	0.378218	0.395558	0.376841	0.372898	0.38241	0.346643	0.376123	0.353808	0.399445	0.370568	0.367126	0.369812	0.369995	0.391161	0.361085	0.365346	0.353611	0.367174	0.371196	0.376228	0.360838	0.367282
ERBB_SIGNALING_PATHWAY	0.428674	0.404922	0.405004	0.417211	0.442265	0.450924	0.427911	0.413983	0.439082	0.438316	0.444986	0.432031	0.436005	0.42161	0.418418	0.388731	0.419285	0.43764	0.41554	0.427472	0.454825	0.417003	0.431312	0.431945	0.412302	0.436083	0.437749	0.427759	0.443717	0.432314	0.418138	0.434945	0.413632	0.430025	0.421846	0.442243	0.431908	0.421998	0.425377	0.414168	0.444529	0.42373	0.431131	0.428587	0.437375	0.425459	0.433511	0.415255	0.421581
CALCIUM_SIGNALING_PATHWAY	0.292617	0.221592	0.265605	0.219106	0.30414	0.321218	0.276883	0.230722	0.296798	0.28285	0.280203	0.27852	0.265556	0.260509	0.231809	0.206854	0.231008	0.289589	0.245903	0.256567	0.314225	0.237714	0.306971	0.2365	0.256738	0.274346	0.263168	0.289465	0.311688	0.271817	0.246944	0.287396	0.219978	0.255951	0.234102	0.329952	0.243051	0.234984	0.269236	0.230204	0.288874	0.260385	0.234127	0.252126	0.267037	0.274879	0.257069	0.229855	0.256825
CYTOKINE_CYTOKINE_RECEPTOR_INTERACTION	0.321597	0.180932	0.205913	0.258116	0.275965	0.256898	0.266563	0.28327	0.32422	0.284628	0.30286	0.323073	0.28881	0.236847	0.275698	0.165105	0.225526	0.317068	0.236868	0.303548	0.318509	0.267637	0.293727	0.222129	0.197235	0.214951	0.271392	0.239257	0.288814	0.285152	0.244941	0.322004	0.249332	0.29591	0.286575	0.306951	0.301521	0.285601	0.260944	0.265413	0.330041	0.234798	0.254104	0.270505	0.269081	0.298495	0.320565	0.257207	0.300371
CHEMOKINE_SIGNALING_PATHWAY	0.433451	0.319082	0.34503	0.373231	0.400863	0.394168	0.372005	0.394868	0.424767	0.399966	0.408683	0.424136	0.409719	0.37497	0.397057	0.311909	0.358677	0.414547	0.35539	0.420325	0.416401	0.374444	0.418295	0.337438	0.34509	0.345754	0.37296	0.37203	0.408417	0.41869	0.353106	0.432675	0.359834	0.403171	0.397166	0.420309	0.408798	0.3866	0.370681	0.376023	0.424589	0.363617	0.374008	0.397952	0.388672	0.407121	0.42054	0.36953	0.412882
PHOSPHATIDYLINOSITOL_SIGNALING_SYSTEM	0.415411	0.398401	0.401626	0.415074	0.426248	0.440145	0.416447	0.427568	0.414994	0.422546	0.432085	0.429982	0.414964	0.420272	0.417008	0.365796	0.418386	0.410271	0.386217	0.42776	0.423575	0.399563	0.410434	0.418084	0.409218	0.387978	0.412795	0.407422	0.439152	0.427951	0.398955	0.437665	0.408254	0.419527	0.412313	0.41958	0.410354	0.414673	0.414569	0.397556	0.421712	0.415937	0.42252	0.434798	0.428555	0.420373	0.403614	0.396609	0.421026
NEUROACTIVE_LIGAND_RECEPTOR_INTERACTION	0.121864	0.0155956	0.0812859	0.0397009	0.105083	0.127368	0.0814991	0.033832	0.141539	0.112653	0.106245	0.0968113	0.0875337	0.0567501	0.0355585	0.0159908	0.043972	0.123616	0.0953968	0.0802328	0.156658	0.0702342	0.166159	0.0303714	0.0939265	0.124907	0.0860732	0.117194	0.126905	0.0791831	0.0779082	0.101228	0.0433592	0.0829477	0.0601631	0.164862	0.0574146	0.0568065	0.0582882	0.0253243	0.140089	0.0768884	0.0507905	0.0644049	0.0789825	0.0867548	0.0788512	0.0275296	0.0721045
CELL_CYCLE	0.47593	0.471189	0.487768	0.496377	0.458185	0.4305	0.455825	0.496317	0.483931	0.482488	0.470474	0.480856	0.461401	0.463933	0.489877	0.500874	0.477377	0.47656	0.499559	0.473454	0.492125	0.474167	0.485552	0.500139	0.49875	0.426198	0.493228	0.485267	0.484171	0.448161	0.453108	0.482999	0.485022	0.480732	0.500533	0.454013	0.498051	0.470969	0.498318	0.494308	0.497469	0.480051	0.489038	0.475206	0.463702	0.499421	0.474564	0.491233	0.491187
OOCYTE_MEIOSIS	0.412751	0.400851	0.405963	0.409687	0.408483	0.398351	0.402105	0.404823	0.410234	0.402026	0.404411	0.407976	0.385511	0.40686	0.406549	0.399708	0.40112	0.413936	0.412752	0.406149	0.424259	0.394789	0.424268	0.413002	0.411205	0.378292	0.418207	0.412235	0.427077	0.39334	0.394941	0.413128	0.402884	0.400649	0.405773	0.407877	0.415784	0.393454	0.428671	0.414305	0.420368	0.403855	0.406661	0.400446	0.405777	0.410006	0.394688	0.404738	0.408677
P53_SIGNALING_PATHWAY	0.468322	0.456074	0.466258	0.467712	0.465731	0.424846	0.461587	0.478968	0.476846	0.472949	0.477652	0.477807	0.457089	0.453839	0.458722	0.443278	0.45442	0.467485	0.466094	0.467295	0.485912	0.457017	0.472261	0.485862	0.478033	0.420097	0.471856	0.466404	0.48699	0.455467	0.463159	0.480166	0.453874	0.472326	0.459432	0.448048	0.48128	0.467526	0.482934	0.471682	0.472871	0.461558	0.459965	0.451285	0.460801	0.478857	0.465387	0.479946	0.472208
UBIQUITIN_MEDIATED_PROTEOLYSIS	0.480901	0.484214	0.483377	0.485977	0.48679	0.497533	0.476011	0.48826	0.492417	0.496841	0.491952	0.490832	0.484448	0.482305	0.486046	0.480096	0.487899	0.488403	0.488495	0.483321	0.495535	0.482314	0.474677	0.490651	0.484252	0.48055	0.486563	0.491833	0.490033	0.482653	0.480293	0.493428	0.484751	0.485977	0.496319	0.477169	0.495842	0.486567	0.489458	0.480879	0.484748	0.478695	0.487939	0.492715	0.484918	0.487851	0.47988	0.486502	0.48544
REGULATION_OF_AUTOPHAGY	0.163226	0.147907	0.13556	0.13973	0.155256	0.173817	0.146881	0.138413	0.174413	0.154684	0.176031	0.172262	0.147433	0.152554	0.145371	0.169687	0.162716	0.169786	0.153818	0.157676	0.163718	0.13475	0.146956	0.186287	0.141776	0.172155	0.167212	0.164495	0.152283	0.144502	0.160202	0.16529	0.176902	0.164055	0.149896	0.153544	0.160144	0.179246	0.155906	0.170483	0.174828	0.137128	0.147147	0.165602	0.15974	0.14621	0.14307	0.152255	0.157774
ENDOCYTOSIS	0.468644	0.449711	0.453334	0.454593	0.471474	0.465985	0.460924	0.458222	0.475204	0.477312	0.47487	0.468853	0.460831	0.449913	0.452663	0.423107	0.456965	0.468887	0.446619	0.460641	0.479643	0.448661	0.471155	0.461528	0.4477	0.457738	0.468143	0.455768	0.471707	0.463092	0.458968	0.468786	0.456125	0.460307	0.450494	0.474835	0.460106	0.461988	0.454876	0.449107	0.475263	0.459995	0.452038	0.460998	0.467181	0.460731	0.465228	0.4456	0.46143
PEROXISOME	0.438953	0.439339	0.434205	0.437509	0.45195	0.424668	0.417352	0.440593	0.465481	0.444242	0.424496	0.422769	0.41723	0.433848	0.445392	0.426007	0.429347	0.442519	0.425399	0.457416	0.435401	0.447729	0.436813	0.404297	0.437066	0.467631	0.438729	0.44433	0.425086	0.42362	0.414068	0.426423	0.440405	0.439232	0.474594	0.432762	0.459186	0.430521	0.432266	0.420423	0.425173	0.450277	0.431482	0.449862	0.448554	0.440974	0.433073	0.418866	0.44168
MTOR_SIGNALING_PATHWAY	0.437186	0.430249	0.425642	0.410043	0.442113	0.461564	0.422734	0.416615	0.436094	0.447239	0.442378	0.43978	0.428719	0.416242	0.410382	0.413188	0.420739	0.437076	0.433152	0.420337	0.454007	0.395737	0.437965	0.413579	0.402161	0.429556	0.432304	0.421316	0.456938	0.443972	0.409172	0.456144	0.414514	0.433538	0.424326	0.453004	0.422987	0.441386	0.421908	0.423301	0.43532	0.414376	0.417511	0.422471	0.432846	0.432925	0.419477	0.411322	0.424462
APOPTOSIS	0.459145	0.419037	0.418165	0.445426	0.454453	0.438109	0.439277	0.449307	0.453954	0.451527	0.448128	0.465189	0.44731	0.439405	0.447896	0.393849	0.435755	0.450101	0.417922	0.457417	0.458629	0.431914	0.434933	0.4281	0.395012	0.419818	0.434814	0.414192	0.451231	0.459875	0.427217	0.4674	0.434806	0.448938	0.443961	0.442857	0.461561	0.453276	0.438312	0.443153	0.453812	0.424124	0.443326	0.442784	0.446905	0.452476	0.460232	0.437897	0.449719
VASCULAR_SMOOTH_MUSCLE_CONTRACTION	0.37579	0.324288	0.34855	0.3245	0.38985	0.391994	0.367572	0.324395	0.365754	0.3663	0.348507	0.365586	0.360916	0.357236	0.31719	0.320563	0.333312	0.373301	0.339179	0.345755	0.377784	0.319771	0.374639	0.332291	0.345128	0.339215	0.342711	0.374782	0.394617	0.368291	0.341865	0.378415	0.314186	0.353593	0.324362	0.395227	0.333527	0.317117	0.364068	0.312796	0.363089	0.354882	0.33504	0.342068	0.36676	0.346266	0.349622	0.32086	0.336862
WNT_SIGNALING_PATHWAY	0.414831	0.397289	0.406257	0.373911	0.403885	0.422462	0.399799	0.365545	0.413541	0.421882	0.398489	0.408924	0.391941	0.388303	0.361934	0.381649	0.384015	0.41146	0.421188	0.395201	0.42319	0.36065	0.406635	0.390171	0.403848	0.371773	0.39644	0.421656	0.42255	0.405551	0.384267	0.401811	0.365749	0.388759	0.383321	0.42828	0.385668	0.387802	0.399881	0.38067	0.405741	0.402547	0.380623	0.379486	0.396554	0.405127	0.39219	0.371577	0.393901
DORSO_VENTRAL_AXIS_FORMATION	0.449665	0.386048	0.412542	0.398128	0.429448	0.434172	0.435021	0.399984	0.441113	0.427618	0.431792	0.428494	0.404358	0.428129	0.439142	0.387497	0.428722	0.439712	0.375759	0.406105	0.449118	0.397212	0.406713	0.426838	0.397512	0.388718	0.415038	0.445521	0.450557	0.425561	0.387887	0.433643	0.407773	0.410242	0.402672	0.442469	0.421185	0.432983	0.414441	0.42543	0.443192	0.430801	0.443723	0.398733	0.427666	0.402496	0.394404	0.422264	0.419866
NOTCH_SIGNALING_PATHWAY	0.483704	0.474282	0.480876	0.465458	0.477244	0.466244	0.470499	0.480298	0.483335	0.487142	0.471187	0.490689	0.470743	0.468127	0.45446	0.469198	0.457257	0.482126	0.475193	0.468037	0.494814	0.46337	0.49616	0.477121	0.478694	0.46688	0.476163	0.47821	0.488414	0.482781	0.45931	0.488855	0.457849	0.47932	0.453466	0.484264	0.454374	0.467776	0.457097	0.481225	0.485451	0.494521	0.460174	0.483295	0.474232	0.470311	0.475446	0.458251	0.474045
HEDGEHOG_SIGNALING_PATHWAY	0.313893	0.238273	0.298653	0.241256	0.291048	0.2812	0.298968	0.216517	0.330561	0.352592	0.289588	0.299191	0.296657	0.249937	0.243448	0.226979	0.272226	0.304004	0.331557	0.296249	0.347287	0.247526	0.312111	0.281647	0.300792	0.236834	0.262056	0.302036	0.351716	0.298502	0.247351	0.285735	0.245225	0.269309	0.259734	0.346728	0.268728	0.259796	0.276478	0.277333	0.322945	0.312352	0.261361	0.241862	0.305991	0.309217	0.316612	0.245828	0.261739
TGF_BETA_SIGNALING_PATHWAY	0.429081	0.403944	0.409357	0.381175	0.416063	0.421452	0.418559	0.378042	0.425587	0.443029	0.422368	0.421951	0.405921	0.393575	0.38233	0.415908	0.378951	0.427773	0.41533	0.395192	0.443362	0.366424	0.414878	0.410371	0.417072	0.400899	0.396203	0.418105	0.442273	0.410445	0.378434	0.416811	0.378627	0.393338	0.37866	0.442877	0.40441	0.397269	0.410275	0.410871	0.42931	0.405876	0.388904	0.380576	0.390074	0.411327	0.423635	0.403882	0.389559
AXON_GUIDANCE	0.416882	0.380096	0.402386	0.379463	0.419157	0.415498	0.396275	0.365706	0.425635	0.427271	0.410545	0.410819	0.402327	0.383179	0.365406	0.353594	0.382674	0.417301	0.379743	0.38771	0.4415	0.367311	0.418892	0.389569	0.408523	0.400572	0.40984	0.414719	0.438758	0.413618	0.384377	0.412293	0.375995	0.39054	0.37545	0.43453	0.388353	0.385815	0.389781	0.375412	0.415648	0.398142	0.379209	0.378825	0.398477	0.396335	0.395866	0.378127	0.38426
VEGF_SIGNALING_PATHWAY	0.434073	0.384344	0.388291	0.395661	0.42112	0.398608	0.397468	0.388914	0.42042	0.412304	0.390935	0.412569	0.401691	0.390125	0.403906	0.391399	0.397744	0.415071	0.383967	0.419278	0.419832	0.386399	0.416592	0.372568	0.37514	0.374094	0.398448	0.406843	0.420491	0.425917	0.398369	0.41767	0.395015	0.402115	0.397415	0.420521	0.402654	0.396422	0.394233	0.400797	0.411337	0.402018	0.401748	0.4014	0.41831	0.410163	0.415959	0.386943	0.401822
FOCAL_ADHESION	0.453259	0.421122	0.42706	0.414645	0.456052	0.459771	0.433093	0.414931	0.451192	0.453674	0.455339	0.453101	0.446791	0.424291	0.409826	0.4059	0.406716	0.457289	0.418201	0.427191	0.472286	0.407824	0.457516	0.441137	0.424895	0.418831	0.43565	0.44398	0.467503	0.448705	0.418608	0.45895	0.394768	0.427129	0.408559	0.470155	0.440072	0.43353	0.431247	0.416043	0.452843	0.42709	0.423047	0.418746	0.440175	0.435143	0.441643	0.41442	0.428586
ECM_RECEPTOR_INTERACTION	0.447271	0.397675	0.395584	0.390484	0.434713	0.430655	0.403502	0.38614	0.432358	0.444319	0.441758	0.431443	0.427877	0.377622	0.372707	0.361265	0.368526	0.443149	0.401854	0.400126	0.459124	0.372727	0.449934	0.408049	0.397405	0.389119	0.415491	0.426289	0.458001	0.415267	0.389949	0.44162	0.358795	0.389972	0.364804	0.458858	0.416458	0.412598	0.409402	0.385486	0.442532	0.397645	0.388295	0.384188	0.413592	0.413625	0.427817	0.386574	0.405737
CELL_ADHESION_MOLECULES_CAMS	0.436679	0.328937	0.34132	0.338495	0.410973	0.406278	0.388997	0.375925	0.442421	0.403853	0.409665	0.431387	0.381457	0.373356	0.343824	0.297519	0.340124	0.420801	0.355487	0.420839	0.430826	0.348499	0.423296	0.345463	0.33395	0.375505	0.374401	0.379929	0.421542	0.42497	0.350584	0.437154	0.328935	0.397062	0.367037	0.451627	0.400261	0.371666	0.388299	0.345962	0.414179	0.360951	0.366073	0.380025	0.371368	0.414284	0.400094	0.342201	0.397603
ADHERENS_JUNCTION	0.49281	0.492285	0.488772	0.479054	0.501975	0.506784	0.493074	0.479096	0.493671	0.515642	0.500017	0.502748	0.497076	0.49351	0.478364	0.47019	0.479166	0.499085	0.484734	0.480068	0.509504	0.470203	0.48871	0.491574	0.481579	0.484897	0.491609	0.511794	0.506868	0.492482	0.482057	0.504159	0.471489	0.486257	0.481598	0.510597	0.489698	0.490227	0.503235	0.475636	0.491964	0.489617	0.484529	0.479563	0.492934	0.484391	0.487282	0.47769	0.490789
TIGHT_JUNCTION	0.395657	0.378145	0.386208	0.379745	0.402686	0.395307	0.410452	0.379895	0.407875	0.404582	0.398696	0.40681	0.388186	0.392021	0.370172	0.3976	0.385808	0.400763	0.365267	0.393746	0.409656	0.385564	0.40168	0.381541	0.387066	0.385692	0.399916	0.418949	0.409217	0.388635	0.390887	0.404717	0.371507	0.399545	0.38012	0.423368	0.395667	0.391909	0.392757	0.370844	0.392202	0.395751	0.390185	0.372762	0.397598	0.396955	0.378604	0.386457	0.381715
GAP_JUNCTION	0.373637	0.330307	0.356158	0.347833	0.388141	0.401648	0.378475	0.348059	0.390547	0.377438	0.378956	0.376128	0.3851	0.359732	0.356823	0.35229	0.349863	0.384223	0.36518	0.363964	0.420172	0.349378	0.396455	0.354016	0.376902	0.361458	0.377555	0.389937	0.401073	0.369439	0.349977	0.369878	0.3522	0.379336	0.34289	0.400181	0.37546	0.35448	0.363997	0.345318	0.385745	0.364079	0.356329	0.351706	0.374817	0.372545	0.358627	0.347891	0.363487
COMPLEMENT_AND_COAGULATION_CASCADES	0.349129	0.240759	0.298803	0.279628	0.343387	0.317071	0.318851	0.279772	0.393382	0.356282	0.357052	0.320229	0.33847	0.290302	0.303382	0.297886	0.298419	0.356705	0.250054	0.361023	0.336018	0.350341	0.391781	0.296251	0.346757	0.394243	0.362815	0.356951	0.32726	0.320873	0.315943	0.333823	0.330574	0.343708	0.311638	0.32984	0.343526	0.321307	0.305455	0.271831	0.35996	0.310152	0.28835	0.310486	0.323147	0.312067	0.322128	0.261628	0.324852
ANTIGEN_PROCESSING_AND_PRESENTATION	0.371181	0.292397	0.289431	0.313579	0.335911	0.334177	0.316814	0.384721	0.375056	0.314832	0.347954	0.379643	0.323965	0.333134	0.351162	0.267958	0.325069	0.348947	0.308883	0.370555	0.361778	0.315671	0.347046	0.324336	0.286783	0.314176	0.365034	0.310121	0.328593	0.353032	0.326538	0.398424	0.331759	0.355819	0.35042	0.355685	0.361032	0.333642	0.349871	0.350413	0.366381	0.303921	0.314436	0.384686	0.335652	0.372673	0.347707	0.350848	0.360535
TOLL_LIKE_RECEPTOR_SIGNALING_PATHWAY	0.37337	0.307968	0.315731	0.332071	0.354469	0.346191	0.33283	0.370882	0.377452	0.353822	0.372757	0.383278	0.361575	0.335907	0.35881	0.268281	0.324015	0.370544	0.332439	0.370519	0.375028	0.332076	0.365334	0.336606	0.303728	0.327165	0.356263	0.32873	0.357729	0.367675	0.319328	0.39176	0.336974	0.359785	0.359777	0.355554	0.378957	0.371764	0.350261	0.352693	0.381065	0.324957	0.331941	0.367482	0.342255	0.362144	0.364417	0.349615	0.361792
NOD_LIKE_RECEPTOR_SIGNALING_PATHWAY	0.443701	0.355626	0.360146	0.436557	0.432269	0.401463	0.411611	0.433043	0.439219	0.423146	0.439134	0.435749	0.460794	0.392882	0.443644	0.326005	0.39471	0.442785	0.395374	0.430221	0.440152	0.3947	0.434339	0.383043	0.335639	0.37277	0.423239	0.387242	0.420551	0.411548	0.409463	0.447246	0.392166	0.428425	0.450687	0.412654	0.451942	0.431203	0.426463	0.425629	0.462449	0.376101	0.406737	0.431077	0.420462	0.434615	0.445052	0.421328	0.422797
RIG_I_LIKE_RECEPTOR_SIGNALING_PATHWAY	0.320212	0.281918	0.288545	0.29948	0.309248	0.297504	0.314051	0.323173	0.318387	0.304506	0.308392	0.341448	0.305397	0.298854	0.306034	0.260944	0.314882	0.315352	0.29117	0.327041	0.313621	0.294664	0.311684	0.324906	0.28267	0.274237	0.323043	0.301065	0.303949	0.324333	0.298781	0.332479	0.31921	0.327134	0.299301	0.305124	0.322558	0.32086	0.323479	0.318264	0.31841	0.293911	0.299933	0.317329	0.313303	0.318349	0.308697	0.318725	0.325796
CYTOSOLIC_DNA_SENSING_PATHWAY	0.309522	0.244754	0.255101	0.297468	0.289836	0.273958	0.293239	0.316837	0.309609	0.280549	0.31112	0.321298	0.303304	0.285999	0.318388	0.239125	0.291843	0.310666	0.27373	0.310664	0.31218	0.296388	0.297521	0.307708	0.25384	0.253662	0.312674	0.267249	0.293126	0.304395	0.285659	0.314976	0.296828	0.311981	0.318218	0.298282	0.324905	0.307305	0.314001	0.323447	0.320913	0.275422	0.29474	0.304504	0.29115	0.312205	0.311006	0.316805	0.304507
JAK_STAT_SIGNALING_PATHWAY	0.300924	0.217248	0.226489	0.265665	0.274274	0.272719	0.279126	0.288419	0.313305	0.292551	0.299503	0.309569	0.28064	0.247682	0.273558	0.217273	0.256016	0.307477	0.254582	0.296109	0.308924	0.261142	0.280384	0.266935	0.238381	0.255326	0.294874	0.258226	0.289396	0.290945	0.24544	0.312701	0.264496	0.287019	0.292689	0.288178	0.297574	0.281837	0.281215	0.268582	0.312157	0.248903	0.274822	0.271858	0.282183	0.294781	0.308655	0.257492	0.298253
HEMATOPOIETIC_CELL_LINEAGE	0.3844	0.215994	0.249615	0.299249	0.326324	0.343132	0.306138	0.317143	0.367113	0.321802	0.34584	0.367136	0.340418	0.28376	0.31328	0.201662	0.269717	0.358501	0.270679	0.389569	0.365683	0.290436	0.351206	0.250314	0.218639	0.27275	0.286648	0.260751	0.334178	0.37252	0.266718	0.378542	0.286376	0.347214	0.321838	0.367934	0.341888	0.338058	0.282633	0.289433	0.388826	0.267981	0.316054	0.324022	0.312246	0.352056	0.39363	0.281898	0.370129
NATURAL_KILLER_CELL_MEDIATED_CYTOTOXICITY	0.346217	0.260167	0.269508	0.292799	0.315288	0.303714	0.305669	0.345222	0.347813	0.302585	0.332569	0.359549	0.317396	0.302301	0.323112	0.25092	0.298167	0.329596	0.280212	0.351089	0.347909	0.292123	0.316495	0.308165	0.250203	0.27507	0.342616	0.286523	0.313647	0.34155	0.290972	0.374707	0.310778	0.334367	0.324871	0.33596	0.341725	0.309604	0.313859	0.344922	0.350152	0.290021	0.288662	0.349096	0.316803	0.338372	0.335382	0.33411	0.342264
T_CELL_RECEPTOR_SIGNALING_PATHWAY	0.438402	0.365696	0.363312	0.399367	0.41404	0.414438	0.390931	0.425774	0.444745	0.415276	0.426874	0.447008	0.383821	0.397907	0.403375	0.343265	0.38289	0.415581	0.381968	0.448431	0.443048	0.396042	0.408043	0.382768	0.357066	0.383864	0.415854	0.385882	0.407757	0.455101	0.370858	0.458506	0.380286	0.422048	0.414951	0.418666	0.421712	0.412824	0.39652	0.408468	0.436179	0.383885	0.392589	0.429787	0.402942	0.43117	0.417182	0.394538	0.438838
B_CELL_RECEPTOR_SIGNALING_PATHWAY	0.489714	0.403338	0.422454	0.434043	0.459386	0.449532	0.432964	0.442925	0.469406	0.450013	0.4603	0.482276	0.436859	0.444081	0.440238	0.403665	0.43564	0.455264	0.403293	0.502717	0.472457	0.429274	0.46244	0.419236	0.410937	0.410241	0.440042	0.420116	0.452867	0.509926	0.413513	0.48749	0.434266	0.470181	0.445014	0.467482	0.458034	0.455215	0.427527	0.437593	0.46441	0.432172	0.450155	0.455605	0.448454	0.459368	0.471639	0.424145	0.478064
FC_EPSILON_RI_SIGNALING_PATHWAY	0.394129	0.337156	0.331477	0.361508	0.38751	0.362943	0.358116	0.358177	0.381454	0.378592	0.369832	0.379769	0.366083	0.347162	0.360344	0.308408	0.350379	0.374508	0.341445	0.39377	0.390308	0.349494	0.374494	0.335092	0.326903	0.333405	0.352733	0.347446	0.376346	0.402231	0.342591	0.385964	0.346201	0.367566	0.365814	0.377123	0.372992	0.353082	0.346548	0.350395	0.386202	0.361159	0.355439	0.371645	0.377646	0.378033	0.37775	0.335562	0.364816
FC_GAMMA_R_MEDIATED_PHAGOCYTOSIS	0.474884	0.437726	0.434248	0.444586	0.468818	0.454364	0.443483	0.454233	0.473901	0.464234	0.469575	0.474738	0.476225	0.445804	0.457281	0.401823	0.440058	0.457728	0.429736	0.47708	0.472088	0.438197	0.472307	0.436981	0.431775	0.423038	0.445732	0.438678	0.467177	0.489402	0.420424	0.484859	0.435048	0.460309	0.453198	0.468266	0.458359	0.44984	0.445227	0.440175	0.472817	0.447868	0.44541	0.462982	0.455243	0.464403	0.462387	0.437062	0.472403
LEUKOCYTE_TRANSENDOTHELIAL_MIGRATION	0.435191	0.387317	0.391345	0.384125	0.42727	0.412223	0.418531	0.409904	0.438989	0.422681	0.424714	0.439588	0.422048	0.408922	0.392685	0.384928	0.391825	0.429012	0.376528	0.433792	0.432348	0.397493	0.429911	0.388468	0.379771	0.38781	0.406407	0.415513	0.432621	0.438049	0.391543	0.445883	0.390945	0.42251	0.407229	0.444334	0.418938	0.413051	0.394138	0.391619	0.42135	0.409291	0.403831	0.405888	0.411439	0.425765	0.414501	0.391581	0.415708
INTESTINAL_IMMUNE_NETWORK_FOR_IGA_PRODUCTION	0.434538	0.263548	0.24722	0.316456	0.354302	0.345946	0.314759	0.375207	0.410449	0.323392	0.370997	0.411189	0.326299	0.332113	0.337885	0.200843	0.270246	0.367537	0.281769	0.443676	0.392145	0.338318	0.375638	0.257561	0.233992	0.283095	0.340732	0.299765	0.356432	0.428144	0.292664	0.420765	0.322455	0.389439	0.357716	0.392293	0.384078	0.350005	0.338123	0.309258	0.399369	0.296136	0.339033	0.367402	0.352881	0.386978	0.385521	0.2848	0.412726
LONG_TERM_POTENTIATION	0.374362	0.347032	0.36161	0.347006	0.389204	0.399217	0.37448	0.352045	0.368773	0.366847	0.36801	0.368986	0.365413	0.371609	0.345289	0.340481	0.363937	0.364491	0.350959	0.365685	0.386576	0.339222	0.394858	0.352556	0.370983	0.365239	0.36305	0.391059	0.388924	0.381762	0.367881	0.373384	0.335931	0.36113	0.349212	0.39136	0.357063	0.347157	0.381489	0.355473	0.372622	0.363747	0.358712	0.368521	0.375078	0.362342	0.362743	0.349577	0.362879
NEUROTROPHIN_SIGNALING_PATHWAY	0.454101	0.432305	0.436058	0.430499	0.45537	0.457156	0.444591	0.434259	0.452919	0.450435	0.456274	0.452031	0.44732	0.432336	0.426041	0.410354	0.43234	0.446591	0.449819	0.446824	0.470073	0.411465	0.448206	0.448393	0.427542	0.43104	0.440179	0.445148	0.466466	0.461148	0.426419	0.458574	0.417364	0.443968	0.425663	0.462908	0.443433	0.438844	0.443352	0.430524	0.452332	0.442139	0.431083	0.440606	0.443705	0.441885	0.442852	0.429366	0.442453
LONG_TERM_DEPRESSION	0.340091	0.287549	0.29782	0.306147	0.352808	0.352579	0.332679	0.304078	0.338557	0.326788	0.306819	0.325654	0.332091	0.313596	0.304524	0.280829	0.31195	0.338305	0.311519	0.324622	0.343857	0.296699	0.352529	0.273871	0.31704	0.312118	0.313982	0.334152	0.352679	0.343002	0.315669	0.328134	0.30889	0.319462	0.303532	0.351752	0.320753	0.29358	0.328615	0.296734	0.340606	0.313662	0.313171	0.316619	0.339502	0.319309	0.316638	0.286058	0.30359
OLFACTORY_TRANSDUCTION	-0.35445	-0.341205	-0.376896	-0.376165	-0.371875	-0.344467	-0.306122	-0.358084	-0.334365	-0.365209	-0.36418	-0.350521	-0.352259	-0.328599	-0.349466	-0.250421	-0.369717	-0.356371	-0.357482	-0.349956	-0.350941	-0.363609	-0.354055	-0.363231	-0.330025	-0.369932	-0.354006	-0.303251	-0.351946	-0.352235	-0.361728	-0.359866	-0.295302	-0.363743	-0.383745	-0.375206	-0.37805	-0.33706	-0.361807	-0.381911	-0.360391	-0.366604	-0.288169	-0.360421	-0.353898	-0.369955	-0.354961	-0.364612	-0.354685
REGULATION_OF_ACTIN_CYTOSKELETON	0.41194	0.388741	0.387772	0.384229	0.413329	0.419871	0.395381	0.38425	0.417825	0.414647	0.41075	0.410298	0.403463	0.391889	0.376897	0.374936	0.379559	0.411347	0.396979	0.39803	0.424051	0.382693	0.412891	0.395879	0.387991	0.394276	0.401475	0.402837	0.420321	0.402977	0.384594	0.420225	0.372338	0.395986	0.38076	0.427845	0.400413	0.397708	0.396308	0.384146	0.41115	0.394626	0.386843	0.39246	0.398137	0.397928	0.397943	0.382224	0.399884
INSULIN_SIGNALING_PATHWAY	0.432332	0.416154	0.413644	0.410456	0.43398	0.440671	0.43179	0.405423	0.428407	0.431892	0.426462	0.420836	0.425862	0.415011	0.408606	0.407431	0.423855	0.430218	0.417662	0.425639	0.436607	0.398553	0.429038	0.415403	0.417111	0.426797	0.419991	0.438597	0.440065	0.42061	0.410254	0.431322	0.404851	0.415577	0.406169	0.438901	0.421687	0.421898	0.424877	0.409679	0.429947	0.420821	0.414927	0.419639	0.42773	0.416685	0.41893	0.396577	0.417683
GNRH_SIGNALING_PATHWAY	0.381841	0.350897	0.349244	0.357071	0.389997	0.369861	0.379466	0.352485	0.372636	0.378255	0.359067	0.366447	0.366641	0.365622	0.346279	0.325016	0.375798	0.37176	0.358158	0.373531	0.380593	0.34305	0.383011	0.355312	0.362583	0.349879	0.361887	0.380696	0.389955	0.380571	0.376822	0.375599	0.351942	0.368446	0.344461	0.379971	0.363003	0.342893	0.371247	0.350014	0.378519	0.375407	0.361272	0.366527	0.390027	0.356225	0.366413	0.344163	0.35277
PROGESTERONE_MEDIATED_OOCYTE_MATURATION	0.404102	0.384079	0.397789	0.395354	0.404203	0.399005	0.381712	0.398076	0.410789	0.40155	0.403578	0.404429	0.386607	0.385595	0.391027	0.384973	0.390026	0.404451	0.401397	0.387511	0.422159	0.375901	0.423019	0.38925	0.385725	0.391094	0.408621	0.39398	0.429934	0.39405	0.36809	0.419597	0.376894	0.397076	0.391675	0.413532	0.409898	0.388399	0.40478	0.3939	0.412966	0.386915	0.398898	0.379795	0.393331	0.403772	0.392447	0.384077	0.397851
MELANOGENESIS	0.370339	0.320036	0.349282	0.32119	0.354864	0.370277	0.369489	0.314084	0.372296	0.374328	0.349638	0.358863	0.351868	0.333879	0.317292	0.324295	0.343315	0.368154	0.362184	0.353875	0.388376	0.316207	0.37318	0.349974	0.374599	0.323557	0.343324	0.38402	0.39205	0.359441	0.343386	0.359965	0.321146	0.348705	0.316113	0.397257	0.329325	0.322776	0.352081	0.331842	0.365507	0.354332	0.33949	0.332825	0.356355	0.348439	0.351346	0.323679	0.342684
ADIPOCYTOKINE_SIGNALING_PATHWAY	0.406349	0.373919	0.383419	0.371361	0.418947	0.418012	0.371455	0.360538	0.400563	0.396905	0.392605	0.388921	0.382143	0.369499	0.357432	0.352175	0.381218	0.410916	0.368736	0.395548	0.418637	0.356117	0.409077	0.359811	0.361542	0.383081	0.379952	0.415766	0.407758	0.382548	0.372467	0.395871	0.375934	0.38407	0.377038	0.423586	0.394866	0.39609	0.386585	0.370703	0.419746	0.3936	0.372803	0.371431	0.391225	0.383658	0.37982	0.354877	0.372253
TYPE_II_DIABETES_MELLITUS	0.339493	0.273491	0.299644	0.306548	0.32693	0.322449	0.284912	0.310771	0.345626	0.354855	0.31809	0.332431	0.309613	0.290973	0.288727	0.302953	0.308893	0.335689	0.300061	0.334578	0.361882	0.284277	0.37558	0.278166	0.341833	0.315892	0.320954	0.350114	0.330261	0.306584	0.305979	0.337393	0.30153	0.324597	0.309744	0.355025	0.322574	0.300451	0.305936	0.306835	0.345548	0.314127	0.292043	0.310469	0.328696	0.314171	0.313331	0.296514	0.328934
TYPE_I_DIABETES_MELLITUS	0.427798	0.29886	0.294062	0.337037	0.368294	0.354985	0.361324	0.414654	0.429646	0.351529	0.431364	0.435802	0.379014	0.340627	0.393321	0.201139	0.313585	0.419643	0.33653	0.427254	0.418207	0.357431	0.408964	0.318624	0.298447	0.364618	0.393621	0.326815	0.350837	0.404923	0.347022	0.447431	0.348905	0.406599	0.416321	0.392909	0.428141	0.385753	0.390229	0.360765	0.419175	0.322082	0.33961	0.401506	0.361574	0.394876	0.406917	0.364774	0.436002
MATURITY_ONSET_DIABETES_OF_THE_YOUNG	0.245751	0.118641	0.150832	0.267584	0.192438	0.053537	0.179996	0.138602	0.266149	0.175182	0.201385	0.241781	0.157893	0.238937	0.214538	0.229143	0.288928	0.234653	0.109623	0.282554	0.213676	0.298961	0.316969	0.0273682	0.375775	0.26473	0.204957	0.29901	0.192999	0.217126	0.226226	0.178155	0.221971	0.236246	0.180686	0.233542	0.176307	0.159292	0.130955	0.219189	0.249022	0.267022	0.240015	0.187116	0.278097	0.149637	0.213733	0.163872	0.187511
ALDOSTERONE_REGULATED_SODIUM_REABSORPTION	0.372794	0.335738	0.322512	0.312165	0.346561	0.364285	0.352419	0.317015	0.351019	0.347308	0.374977	0.361399	0.352269	0.347536	0.30925	0.309471	0.347424	0.359718	0.32452	0.368183	0.379917	0.312205	0.38102	0.289344	0.32855	0.323147	0.325126	0.364089	0.369662	0.357937	0.340413	0.38013	0.295318	0.360505	0.318491	0.38529	0.326786	0.357156	0.324683	0.313027	0.37779	0.32666	0.331723	0.345711	0.350049	0.334118	0.341619	0.301615	0.350457
VASOPRESSIN_REGULATED_WATER_REABSORPTION	0.475838	0.437379	0.43596	0.445345	0.460705	0.465749	0.453811	0.435336	0.465744	0.462781	0.480633	0.453763	0.441191	0.449769	0.454151	0.441458	0.458527	0.456009	0.451525	0.454982	0.457749	0.437838	0.450275	0.421839	0.456322	0.472098	0.464177	0.462494	0.469892	0.446145	0.464827	0.459028	0.454013	0.455733	0.432355	0.470852	0.447706	0.458695	0.429981	0.43626	0.471022	0.449967	0.463398	0.443979	0.466518	0.450351	0.454428	0.433413	0.43872
ALZHEIMERS_DISEASE	0.482932	0.479153	0.477992	0.478706	0.488844	0.483343	0.487657	0.472305	0.481422	0.464382	0.478729	0.477257	0.481362	0.477646	0.472838	0.477888	0.477321	0.481507	0.48177	0.480701	0.483929	0.482669	0.486257	0.458037	0.479962	0.48171	0.472161	0.482796	0.485843	0.469771	0.486858	0.466338	0.488032	0.477865	0.483808	0.483524	0.485717	0.482017	0.486845	0.4758	0.48326	0.47822	0.485135	0.485932	0.480671	0.482133	0.485724	0.475776	0.473089
PARKINSONS_DISEASE	0.512357	0.509965	0.500383	0.510266	0.515072	0.518886	0.515629	0.501	0.515352	0.486076	0.512043	0.50279	0.512922	0.503894	0.503159	0.522145	0.506177	0.515751	0.523144	0.513468	0.509556	0.513241	0.517423	0.476855	0.51119	0.52203	0.503181	0.518799	0.516336	0.497201	0.520908	0.491429	0.523605	0.501752	0.517267	0.517635	0.515757	0.511034	0.515816	0.507794	0.511128	0.510285	0.512673	0.509689	0.50591	0.51466	0.515399	0.508395	0.498182
AMYOTROPHIC_LATERAL_SCLEROSIS_ALS	0.39898	0.362255	0.382539	0.361691	0.396843	0.397664	0.367265	0.35946	0.401201	0.382562	0.375578	0.382384	0.366019	0.362012	0.359433	0.384331	0.359492	0.384973	0.375618	0.384145	0.410426	0.362914	0.405303	0.32847	0.337928	0.405297	0.373112	0.376546	0.401588	0.382847	0.371659	0.3769	0.37354	0.371873	0.380078	0.420815	0.381176	0.376347	0.402676	0.378449	0.402129	0.368405	0.368279	0.373049	0.372805	0.395341	0.376565	0.373209	0.370516
HUNTINGTONS_DISEASE	0.480404	0.481248	0.476814	0.485137	0.48425	0.482342	0.487328	0.481497	0.482615	0.467942	0.483186	0.474543	0.479722	0.475839	0.478041	0.494792	0.476592	0.483135	0.48794	0.478696	0.484371	0.48695	0.482917	0.459316	0.475656	0.486312	0.482669	0.487738	0.485825	0.468335	0.490717	0.462907	0.493749	0.479092	0.488499	0.479317	0.48546	0.4831	0.478564	0.47852	0.482609	0.481331	0.487844	0.482785	0.484609	0.484052	0.479434	0.479195	0.476364
PRION_DISEASES	0.431545	0.369822	0.404136	0.398816	0.424119	0.43055	0.426642	0.413606	0.435938	0.414301	0.44486	0.436449	0.423347	0.4058	0.415532	0.37004	0.394635	0.44833	0.389267	0.429128	0.452385	0.409005	0.478021	0.393267	0.372429	0.435261	0.432397	0.386437	0.440241	0.409518	0.409742	0.443038	0.387653	0.423863	0.416365	0.438473	0.431007	0.419363	0.431643	0.404769	0.44926	0.394564	0.403609	0.388469	0.426417	0.459229	0.430961	0.400844	0.397504
VIBRIO_CHOLERAE_INFECTION	0.481042	0.474359	0.45899	0.459858	0.482835	0.464321	0.457754	0.458908	0.473265	0.468641	0.468519	0.474242	0.482436	0.477914	0.470957	0.444478	0.47238	0.46618	0.453796	0.481478	0.471412	0.460562	0.487517	0.431544	0.463137	0.446619	0.468183	0.460736	0.479411	0.473539	0.463966	0.472815	0.457228	0.47947	0.472885	0.476654	0.475451	0.463167	0.450804	0.448248	0.487367	0.481439	0.478026	0.463653	0.4738	0.459451	0.477397	0.457894	0.484118
EPITHELIAL_CELL_SIGNALING_IN_HELICOBACTER_PYLORI_INFECTION	0.456697	0.457712	0.43603	0.443304	0.463438	0.443036	0.450653	0.44698	0.46078	0.458892	0.469369	0.451083	0.468062	0.428855	0.45223	0.413648	0.451128	0.458682	0.448737	0.452093	0.462054	0.432732	0.464524	0.441518	0.425961	0.439818	0.457374	0.429122	0.462763	0.437686	0.442092	0.450727	0.44056	0.448781	0.458481	0.457117	0.461271	0.460566	0.44887	0.438537	0.473386	0.446651	0.452292	0.45297	0.460532	0.445402	0.456137	0.443779	0.454114
LEISHMANIA_INFECTION	0.490482	0.399193	0.384736	0.434524	0.464328	0.447524	0.424737	0.471748	0.482974	0.445083	0.476944	0.481463	0.481224	0.425575	0.471382	0.345197	0.400615	0.469903	0.4078	0.479185	0.479898	0.42621	0.482771	0.400973	0.362004	0.415088	0.446443	0.414537	0.45237	0.487057	0.398985	0.503547	0.42528	0.460317	0.474549	0.463115	0.489058	0.470994	0.456399	0.432404	0.48884	0.408384	0.425444	0.467546	0.43178	0.470257	0.48427	0.438722	0.474376
PATHWAYS_IN_CANCER	0.425118	0.403722	0.41045	0.403543	0.421492	0.424511	0.414259	0.403166	0.436419	0.439942	0.424858	0.428421	0.424247	0.399864	0.396201	0.379536	0.40246	0.431115	0.42427	0.41318	0.446778	0.389141	0.42475	0.409428	0.405277	0.388877	0.410764	0.423668	0.448421	0.421325	0.402987	0.432687	0.389945	0.412552	0.401588	0.441643	0.414309	0.406787	0.412759	0.408821	0.439125	0.41067	0.408315	0.399282	0.417079	0.422975	0.422449	0.399867	0.411493
COLORECTAL_CANCER	0.475718	0.471559	0.465132	0.459159	0.474071	0.487201	0.450484	0.475974	0.483073	0.490253	0.476925	0.489151	0.470738	0.463927	0.460035	0.470964	0.461383	0.472898	0.481025	0.469343	0.489614	0.441847	0.470786	0.46229	0.460286	0.454981	0.458971	0.461078	0.491037	0.486645	0.445778	0.491858	0.446695	0.471256	0.465109	0.481599	0.476712	0.473202	0.464754	0.464355	0.48072	0.462251	0.466634	0.466932	0.471763	0.479886	0.474192	0.4577	0.469353
RENAL_CELL_CARCINOMA	0.480694	0.467898	0.467772	0.467094	0.48241	0.496251	0.473874	0.465574	0.487555	0.486445	0.492441	0.486399	0.480393	0.466493	0.467233	0.465036	0.467694	0.487523	0.468986	0.470214	0.49684	0.465376	0.485517	0.476566	0.461095	0.478404	0.477675	0.474597	0.495938	0.486177	0.460242	0.49202	0.4535	0.477442	0.464887	0.488258	0.481793	0.469808	0.468364	0.473191	0.484818	0.467092	0.475403	0.482707	0.477098	0.476612	0.4763	0.462298	0.473751
PANCREATIC_CANCER	0.47211	0.459722	0.464196	0.466983	0.471901	0.466326	0.463567	0.469861	0.486214	0.489651	0.48717	0.482598	0.470757	0.456125	0.464006	0.455115	0.46959	0.485754	0.466132	0.465544	0.496996	0.449139	0.471845	0.48399	0.453976	0.448769	0.476679	0.469662	0.484983	0.472251	0.455462	0.48712	0.461677	0.473651	0.464267	0.473638	0.483282	0.471128	0.46783	0.464404	0.485264	0.464785	0.463229	0.470171	0.469686	0.474044	0.470334	0.465895	0.477661
ENDOMETRIAL_CANCER	0.465744	0.461152	0.454579	0.445589	0.477058	0.48637	0.445236	0.466857	0.47351	0.478936	0.462556	0.475471	0.458316	0.459784	0.454804	0.438254	0.456445	0.463611	0.45482	0.457635	0.492024	0.430889	0.455696	0.455997	0.449359	0.45603	0.45551	0.460917	0.484775	0.474718	0.427072	0.482501	0.442353	0.46315	0.460328	0.476781	0.473688	0.467157	0.46015	0.451954	0.465714	0.455194	0.454797	0.455478	0.468359	0.462317	0.457009	0.44364	0.458361
GLIOMA	0.437019	0.419856	0.417477	0.410105	0.436733	0.442512	0.435863	0.433988	0.43389	0.439384	0.437486	0.437534	0.443674	0.430506	0.41552	0.407635	0.423689	0.43408	0.421183	0.426134	0.453014	0.394257	0.435758	0.451486	0.430126	0.413894	0.426839	0.446074	0.457466	0.452516	0.418074	0.447097	0.4001	0.431163	0.410534	0.444142	0.436531	0.422426	0.437931	0.410519	0.443602	0.428921	0.418927	0.422135	0.433932	0.422329	0.429606	0.420533	0.431727
PROSTATE_CANCER	0.463458	0.442754	0.440806	0.438723	0.457058	0.456015	0.439065	0.450143	0.463549	0.472986	0.462566	0.46093	0.45127	0.443196	0.444042	0.429884	0.441637	0.471846	0.450662	0.449867	0.476021	0.425155	0.450567	0.449889	0.438746	0.43176	0.456265	0.453346	0.471879	0.459562	0.433863	0.466929	0.440496	0.449332	0.436041	0.463759	0.463233	0.44637	0.438565	0.443774	0.468461	0.440985	0.450898	0.436932	0.454825	0.443729	0.452429	0.436099	0.443073
THYROID_CANCER	0.49537	0.465894	0.500447	0.487437	0.494842	0.487896	0.486751	0.476003	0.505141	0.505931	0.479914	0.485767	0.469532	0.490946	0.468326	0.465504	0.48261	0.480771	0.499843	0.489703	0.515696	0.478525	0.485323	0.48744	0.512618	0.460906	0.479004	0.492822	0.510243	0.490658	0.475994	0.488339	0.463164	0.493039	0.475666	0.497655	0.48968	0.482198	0.487619	0.478338	0.496554	0.489733	0.485655	0.465725	0.491267	0.485311	0.493365	0.465603	0.47897
BASAL_CELL_CARCINOMA	0.34874	0.302299	0.347522	0.28222	0.317932	0.329666	0.328632	0.254754	0.368588	0.381907	0.313443	0.339741	0.328297	0.280267	0.276227	0.280996	0.312794	0.347799	0.383217	0.317747	0.380561	0.275079	0.344456	0.324386	0.340668	0.267377	0.322258	0.35282	0.384377	0.341457	0.297614	0.321289	0.285816	0.307168	0.296205	0.387635	0.299062	0.292077	0.309901	0.32112	0.34976	0.344298	0.298819	0.287876	0.332414	0.341771	0.336153	0.290432	0.309347
MELANOMA	0.340577	0.354285	0.327801	0.321282	0.344176	0.363017	0.336514	0.342476	0.359729	0.3708	0.353081	0.343583	0.354628	0.324557	0.296634	0.300411	0.3191	0.355537	0.379434	0.323297	0.372711	0.305654	0.346709	0.338636	0.329688	0.341367	0.327024	0.357443	0.386255	0.338726	0.332875	0.357938	0.292867	0.334969	0.322794	0.375932	0.344774	0.334696	0.338656	0.321291	0.364117	0.330952	0.336863	0.303182	0.334376	0.344204	0.336732	0.327309	0.326457
BLADDER_CANCER	0.501689	0.465984	0.480081	0.501553	0.499543	0.45245	0.498267	0.487653	0.509298	0.504987	0.50309	0.495032	0.492293	0.4672	0.484197	0.467199	0.494095	0.515061	0.477323	0.489508	0.525211	0.486383	0.498825	0.499482	0.470465	0.462819	0.517386	0.492166	0.495258	0.473964	0.497871	0.499423	0.49054	0.502758	0.482309	0.485541	0.509487	0.499575	0.494416	0.501662	0.509281	0.489329	0.495842	0.485633	0.491967	0.496945	0.499399	0.49155	0.497171
CHRONIC_MYELOID_LEUKEMIA	0.500638	0.476682	0.486184	0.492402	0.491534	0.496669	0.481151	0.498	0.497277	0.513126	0.505344	0.504287	0.498903	0.485766	0.486661	0.482066	0.485585	0.497334	0.483181	0.486253	0.506147	0.462901	0.494084	0.507331	0.488599	0.4767	0.489891	0.493941	0.514858	0.503128	0.473739	0.512131	0.473564	0.492139	0.485975	0.498152	0.498863	0.493884	0.493074	0.485094	0.50193	0.491915	0.492001	0.490949	0.490606	0.499474	0.496742	0.483616	0.494454
ACUTE_MYELOID_LEUKEMIA	0.484965	0.445376	0.453822	0.456698	0.480025	0.49255	0.460811	0.469052	0.487248	0.49068	0.474988	0.490942	0.475749	0.464252	0.461372	0.438937	0.46248	0.481636	0.456689	0.484292	0.495567	0.438775	0.478134	0.453919	0.452766	0.452774	0.461358	0.461815	0.497717	0.496786	0.447418	0.500643	0.437758	0.468927	0.459189	0.495779	0.471307	0.466096	0.464998	0.455361	0.484015	0.457854	0.465979	0.473252	0.472475	0.480192	0.473055	0.450175	0.478896
SMALL_CELL_LUNG_CANCER	0.462106	0.43998	0.443349	0.460195	0.464759	0.451881	0.445483	0.469102	0.471709	0.480361	0.46804	0.469271	0.461028	0.443358	0.455543	0.438579	0.455482	0.466428	0.458887	0.462931	0.481488	0.43407	0.45467	0.450559	0.439799	0.421335	0.452711	0.458345	0.475655	0.455481	0.437883	0.48219	0.443535	0.457053	0.456405	0.459521	0.465887	0.461389	0.454477	0.450074	0.483658	0.450127	0.456279	0.438286	0.462699	0.457331	0.466136	0.445846	0.456827
NON_SMALL_CELL_LUNG_CANCER	0.460669	0.436566	0.440803	0.449402	0.459761	0.455139	0.44812	0.467686	0.469087	0.470023	0.463552	0.47194	0.449451	0.451449	0.448062	0.447729	0.452503	0.459643	0.441431	0.461059	0.476919	0.43346	0.455584	0.456952	0.448311	0.428496	0.453625	0.462064	0.46502	0.473109	0.433105	0.481426	0.442939	0.464465	0.449041	0.462203	0.459118	0.4614	0.440644	0.438962	0.474335	0.447054	0.450016	0.454614	0.457317	0.461372	0.45137	0.436643	0.466907
ASTHMA	0.348145	0.214598	0.20527	0.291036	0.331507	0.323864	0.297059	0.332051	0.326676	0.281845	0.353667	0.359554	0.311258	0.305183	0.307632	0.136188	0.230552	0.319283	0.229037	0.367477	0.358536	0.278286	0.339656	0.2037	0.200624	0.294715	0.296062	0.260253	0.31666	0.367164	0.266379	0.367442	0.251639	0.31976	0.321872	0.344595	0.335376	0.304498	0.300831	0.246646	0.373934	0.249502	0.29856	0.335739	0.289048	0.35136	0.330359	0.252287	0.328074
AUTOIMMUNE_THYROID_DISEASE	0.252632	0.158017	0.125466	0.172079	0.215952	0.218877	0.177473	0.249836	0.245078	0.180361	0.232717	0.26681	0.198429	0.19378	0.210926	0.0588383	0.161109	0.210365	0.147297	0.256147	0.243751	0.172467	0.222187	0.180217	0.133167	0.188353	0.213484	0.182977	0.204306	0.247522	0.178576	0.274261	0.179915	0.214067	0.203351	0.227192	0.235166	0.199707	0.21589	0.181309	0.25722	0.160403	0.178483	0.239823	0.198532	0.235938	0.237665	0.164318	0.239272
ALLOGRAFT_REJECTION	0.436552	0.304891	0.281984	0.345821	0.392749	0.381749	0.353212	0.449723	0.449188	0.347231	0.431683	0.454118	0.365203	0.367191	0.39715	0.202435	0.308434	0.403773	0.324643	0.454634	0.426062	0.366568	0.390834	0.324587	0.268078	0.343954	0.409103	0.331338	0.358423	0.43055	0.33029	0.478083	0.3426	0.424126	0.413681	0.402249	0.434226	0.389734	0.392587	0.359076	0.444228	0.313605	0.340692	0.430813	0.360108	0.426989	0.399618	0.345013	0.452227
GRAFT_VERSUS_HOST_DISEASE	0.407324	0.269351	0.245464	0.319709	0.357751	0.330579	0.338917	0.428162	0.428859	0.32581	0.404969	0.440323	0.358357	0.318024	0.400835	0.188122	0.295321	0.395826	0.304733	0.41753	0.410675	0.335511	0.368762	0.301603	0.226292	0.338954	0.407198	0.285948	0.329399	0.395319	0.319992	0.452473	0.315354	0.405467	0.416564	0.387457	0.428774	0.37659	0.379121	0.370183	0.413969	0.290957	0.318415	0.428439	0.344881	0.424273	0.401884	0.357041	0.41408
VIRAL_MYOCARDITIS	0.443961	0.393287	0.38527	0.39173	0.431853	0.429292	0.410244	0.427265	0.449361	0.42645	0.438509	0.451748	0.427319	0.410573	0.410159	0.354737	0.37601	0.433299	0.389472	0.446769	0.447736	0.397963	0.433237	0.384337	0.36808	0.381437	0.426983	0.420522	0.430142	0.451012	0.383644	0.469495	0.390541	0.425893	0.422624	0.448103	0.440538	0.419616	0.428002	0.388949	0.433302	0.396485	0.399607	0.424364	0.418588	0.432576	0.428194	0.390945	0.444453
[truncated: 358 more columns]

## Sheet: Sheet3
cluster	N_GLYCAN_BIOSYNTHESIS	OTHER_GLYCAN_DEGRADATION	O_GLYCAN_BIOSYNTHESIS	GLYCOSAMINOGLYCAN_DEGRADATION	GLYCOSAMINOGLYCAN_BIOSYNTHESIS_KERATAN_SULFATE	GLYCEROLIPID_METABOLISM	GLYCOSYLPHOSPHATIDYLINOSITOL_GPI_ANCHOR_BIOSYNTHESIS	GLYCEROPHOSPHOLIPID_METABOLISM	ETHER_LIPID_METABOLISM	ARACHIDONIC_ACID_METABOLISM	LINOLEIC_ACID_METABOLISM	ALPHA_LINOLENIC_ACID_METABOLISM	SPHINGOLIPID_METABOLISM	GLYCOSPHINGOLIPID_BIOSYNTHESIS_LACTO_AND_NEOLACTO_SERIES	GLYCOSPHINGOLIPID_BIOSYNTHESIS_GLOBO_SERIES	GLYCOSPHINGOLIPID_BIOSYNTHESIS_GANGLIO_SERIES	RIBOFLAVIN_METABOLISM	NICOTINATE_AND_NICOTINAMIDE_METABOLISM	PANTOTHENATE_AND_COA_BIOSYNTHESIS	AMINOACYL_TRNA_BIOSYNTHESIS	BASAL_TRANSCRIPTION_FACTORS	NON_HOMOLOGOUS_END_JOINING	SNARE_INTERACTIONS_IN_VESICULAR_TRANSPORT	LYSOSOME	CARDIAC_MUSCLE_CONTRACTION	RENIN_ANGIOTENSIN_SYSTEM	CIRCADIAN_RHYTHM_MAMMAL	TASTE_TRANSDUCTION	PROXIMAL_TUBULE_BICARBONATE_RECLAMATION	PATHOGENIC_ESCHERICHIA_COLI_INFECTION	SYSTEMIC_LUPUS_ERYTHEMATOSUS	PRIMARY_IMMUNODEFICIENCY	HYPERTROPHIC_CARDIOMYOPATHY_HCM	ARRHYTHMOGENIC_RIGHT_VENTRICULAR_CARDIOMYOPATHY_ARVC	DILATED_CARDIOMYOPATHY	GLYCOLYSIS_GLUCONEOGENESIS	CITRATE_CYCLE_TCA_CYCLE	PENTOSE_PHOSPHATE_PATHWAY	PENTOSE_AND_GLUCURONATE_INTERCONVERSIONS	FRUCTOSE_AND_MANNOSE_METABOLISM	GALACTOSE_METABOLISM	ASCORBATE_AND_ALDARATE_METABOLISM	FATTY_ACID_METABOLISM	STEROID_BIOSYNTHESIS	PRIMARY_BILE_ACID_BIOSYNTHESIS	STEROID_HORMONE_BIOSYNTHESIS	OXIDATIVE_PHOSPHORYLATION	PURINE_METABOLISM	PYRIMIDINE_METABOLISM
C1	0.499405	0.457804	0.389578	0.437179	0.497213	0.381387	0.441543	0.399902	0.381624	0.3366	0.24952	0.298124	0.462598	0.374987	0.448124	0.39537	0.366826	0.382021	0.356597	0.49251	0.401504	0.414751	0.470523	0.508166	0.337864	0.337173	0.492409	0.0399985	0.392807	0.475704	0.309546	0.427097	0.321257	0.362897	0.324958	0.43282	0.514879	0.449378	0.133233	0.468747	0.410125	0.103819	0.433079	0.477098	0.290036	0.127618	0.509971	0.394826	0.442146
C2	0.505901	0.447403	0.300963	0.38077	0.417562	0.365422	0.483035	0.359231	0.318054	0.24324	0.0992263	0.213723	0.448794	0.316947	0.353337	0.361172	0.36704	0.350888	0.335753	0.521721	0.423409	0.433571	0.451139	0.490792	0.309873	0.178573	0.471438	0.0636518	0.351179	0.436938	0.203572	0.21061	0.276552	0.333454	0.270999	0.393259	0.524096	0.445422	0.0270629	0.447161	0.385696	-0.0238496	0.406333	0.464863	0.220893	0.0392455	0.520715	0.379688	0.456582
C2	0.491637	0.474121	0.311822	0.374424	0.43908	0.377094	0.449258	0.378592	0.308102	0.235119	0.0989238	0.179024	0.446093	0.347287	0.425945	0.35608	0.365546	0.378791	0.305484	0.504152	0.409583	0.428874	0.453545	0.483525	0.313668	0.2768	0.4933	0.0510108	0.348193	0.464698	0.281813	0.280852	0.298431	0.338518	0.298006	0.385281	0.498915	0.425954	0.208185	0.424738	0.348599	0.18572	0.411711	0.47418	0.256181	0.153494	0.500714	0.387364	0.452215
C1	0.496858	0.426028	0.334158	0.405793	0.460903	0.377779	0.455752	0.390566	0.335947	0.294652	0.220585	0.23518	0.440094	0.369463	0.391014	0.335849	0.370074	0.361658	0.360196	0.524324	0.417448	0.44675	0.462192	0.481668	0.315315	0.266718	0.468169	0.0222941	0.358794	0.469123	0.30652	0.318355	0.279538	0.318958	0.276653	0.402693	0.521214	0.461611	0.184887	0.487678	0.390606	0.152008	0.407996	0.463782	0.176272	0.121937	0.51559	0.389988	0.457058
C1	0.489477	0.445923	0.36907	0.383738	0.464139	0.387403	0.441943	0.40797	0.381231	0.342591	0.251302	0.296007	0.457022	0.35621	0.408421	0.377267	0.376301	0.401359	0.38308	0.489006	0.401659	0.41298	0.471584	0.504582	0.351821	0.398614	0.485192	0.0451041	0.377099	0.473861	0.266946	0.328971	0.350059	0.384881	0.347481	0.426997	0.518621	0.435779	0.162729	0.472725	0.394625	0.132396	0.444649	0.463853	0.295126	0.18479	0.513268	0.402915	0.440588
C1	0.47007	0.402616	0.335812	0.363686	0.417646	0.341953	0.435229	0.368651	0.301642	0.254786	0.124828	0.190693	0.389304	0.320334	0.3905	0.396463	0.374061	0.395629	0.329946	0.485751	0.429092	0.420072	0.479855	0.478457	0.376718	0.328118	0.510379	0.0448719	0.350831	0.471661	0.218844	0.34069	0.375048	0.40781	0.37009	0.390124	0.498405	0.410938	0.0342991	0.411231	0.352189	0.00657143	0.425149	0.360964	0.26483	0.0457344	0.512486	0.3972	0.420761
C1	0.468236	0.400522	0.373418	0.421565	0.45432	0.358535	0.437511	0.382832	0.355167	0.325902	0.189388	0.250978	0.435873	0.358486	0.406673	0.341584	0.363454	0.380351	0.324293	0.479008	0.405769	0.40145	0.465499	0.483412	0.359128	0.285227	0.496371	0.0306234	0.331216	0.469854	0.31682	0.315383	0.333386	0.367201	0.33288	0.401848	0.467816	0.429032	0.18786	0.424903	0.37308	0.184611	0.413894	0.452566	0.245942	0.154759	0.527191	0.387433	0.438586
C2	0.493853	0.434444	0.336813	0.383405	0.41772	0.329895	0.440017	0.365786	0.320661	0.249797	0.179713	0.197056	0.438155	0.290366	0.371132	0.347745	0.385409	0.356185	0.360213	0.531494	0.424916	0.450151	0.463486	0.492617	0.29581	0.274716	0.467277	0.0149625	0.297932	0.461551	0.301283	0.390205	0.259302	0.307749	0.266293	0.377129	0.491382	0.415461	0.0990281	0.447161	0.401814	0.0341715	0.401707	0.453997	0.23746	0.0768638	0.506277	0.383161	0.466118
C2	0.500848	0.454785	0.394496	0.42786	0.466398	0.416125	0.439113	0.410005	0.382478	0.335012	0.242139	0.26331	0.464704	0.379974	0.467515	0.414905	0.376329	0.38627	0.359387	0.501635	0.415481	0.418	0.468389	0.507642	0.359414	0.344775	0.471885	0.0825135	0.395666	0.494534	0.353572	0.423165	0.335659	0.37048	0.331846	0.42749	0.516067	0.486405	0.332382	0.473601	0.414842	0.319314	0.42775	0.468054	0.307446	0.2741	0.514497	0.403223	0.443608
C2	0.505399	0.443328	0.355384	0.384013	0.44188	0.392216	0.444342	0.400957	0.34725	0.307716	0.200184	0.243497	0.466943	0.318008	0.403089	0.372786	0.385469	0.398469	0.379142	0.488407	0.406781	0.424412	0.456814	0.492662	0.33375	0.313045	0.50108	0.0430562	0.379302	0.47364	0.24131	0.345498	0.335828	0.36713	0.330274	0.380927	0.512573	0.445584	0.148965	0.433078	0.373977	0.120219	0.395623	0.49132	0.290193	0.150538	0.486806	0.385547	0.43064
C1	0.489294	0.435895	0.409374	0.377701	0.430633	0.381581	0.450833	0.374792	0.325796	0.28211	0.181853	0.170598	0.444155	0.386541	0.473678	0.386749	0.37954	0.387598	0.362795	0.504328	0.4165	0.428486	0.486237	0.502896	0.340965	0.312285	0.494471	0.0472306	0.357685	0.476925	0.266578	0.352205	0.333828	0.368223	0.329614	0.413283	0.489427	0.433195	0.14601	0.462586	0.383564	0.100317	0.426184	0.443975	0.270493	0.141208	0.519358	0.401925	0.446212
C2	0.489271	0.449675	0.366951	0.391946	0.458624	0.363874	0.44824	0.377304	0.345696	0.290723	0.175586	0.21839	0.450289	0.363643	0.438073	0.373419	0.400045	0.389504	0.362734	0.495769	0.407282	0.4217	0.465718	0.499983	0.331273	0.303792	0.498886	0.0743648	0.337568	0.486537	0.314791	0.435316	0.327997	0.372142	0.331842	0.412038	0.470786	0.448768	0.129515	0.451971	0.376859	0.0931315	0.437612	0.451865	0.243818	0.103575	0.497394	0.389147	0.442619
C1	0.485182	0.457248	0.396877	0.418831	0.472221	0.371917	0.42362	0.388387	0.344342	0.296884	0.182658	0.223126	0.441316	0.383043	0.449334	0.40617	0.375738	0.386275	0.368355	0.489629	0.406274	0.42065	0.475527	0.502612	0.322092	0.257337	0.481528	0.0382148	0.305695	0.482753	0.23604	0.300574	0.319375	0.358197	0.311433	0.395647	0.486403	0.44142	0.164309	0.460814	0.398835	0.159259	0.389498	0.426384	0.254185	0.13125	0.511143	0.390737	0.443434
C2	0.486769	0.409646	0.329023	0.359254	0.403576	0.363743	0.433986	0.364488	0.318364	0.27203	0.15719	0.189218	0.419789	0.360475	0.394999	0.338758	0.388669	0.380234	0.353058	0.495137	0.403455	0.436045	0.473441	0.48337	0.331917	0.307024	0.466379	0.0431126	0.321157	0.460019	0.239553	0.346845	0.299493	0.337643	0.302451	0.401346	0.485157	0.436405	0.0874332	0.430109	0.355486	0.0362127	0.433215	0.413567	0.236447	0.103018	0.506282	0.386544	0.437473
C2	0.481239	0.427247	0.31097	0.377386	0.425397	0.373367	0.436039	0.386282	0.354807	0.279145	0.237975	0.230132	0.430309	0.294708	0.33348	0.309255	0.380359	0.371108	0.361641	0.513292	0.42972	0.459761	0.47715	0.488995	0.314167	0.257773	0.487668	0.0454386	0.323177	0.480494	0.275002	0.318688	0.273495	0.313633	0.266817	0.412315	0.501895	0.441478	0.186921	0.470291	0.378151	0.161439	0.415478	0.407992	0.247981	0.152426	0.509074	0.383948	0.458972
C1	0.479181	0.399051	0.3123	0.358828	0.432711	0.378804	0.441311	0.344163	0.293486	0.203607	0.0591462	0.172383	0.393983	0.310102	0.361365	0.359094	0.373066	0.309769	0.320189	0.52054	0.42705	0.414041	0.43422	0.475785	0.324584	0.241939	0.441489	-0.006389	0.298483	0.468965	0.27533	0.234293	0.268	0.308708	0.256837	0.36027	0.514056	0.441043	0.0498527	0.429442	0.390539	-0.000484987	0.366235	0.502146	0.246171	0.0368665	0.528458	0.385042	0.456518
C2	0.500508	0.464611	0.373033	0.406066	0.430959	0.358465	0.452307	0.390376	0.34292	0.291015	0.21149	0.238676	0.458486	0.352952	0.36881	0.347294	0.382233	0.366549	0.363416	0.513998	0.418508	0.442416	0.482468	0.493651	0.312673	0.276466	0.503955	0.0516365	0.350046	0.453543	0.285516	0.290575	0.27791	0.312744	0.278275	0.406263	0.504351	0.456431	0.185043	0.460364	0.379191	0.158853	0.419601	0.468923	0.209417	0.153877	0.509273	0.388363	0.449056
C1	0.4977	0.424681	0.376981	0.438896	0.482697	0.38544	0.449272	0.387103	0.360736	0.327031	0.221675	0.2604	0.445232	0.366822	0.442767	0.40407	0.386034	0.394421	0.378841	0.486605	0.408714	0.416146	0.463879	0.506802	0.349601	0.316687	0.513188	0.0282122	0.38699	0.469445	0.279466	0.354541	0.341486	0.369598	0.338335	0.40693	0.500764	0.451347	0.236477	0.46128	0.37827	0.216979	0.423884	0.480613	0.310905	0.218425	0.508979	0.394032	0.446064
C2	0.501043	0.442667	0.315544	0.406959	0.431288	0.347616	0.467903	0.374849	0.318302	0.260681	0.133454	0.235478	0.419823	0.327282	0.384969	0.369738	0.366802	0.363586	0.325715	0.50879	0.408654	0.416202	0.457456	0.484238	0.325021	0.275621	0.472642	0.0236262	0.349893	0.481106	0.285608	0.30998	0.28667	0.328662	0.280272	0.37624	0.490804	0.43927	0.0205523	0.437688	0.365977	-0.0334628	0.395339	0.488325	0.248938	0.00625409	0.524249	0.394591	0.464984
C2	0.487033	0.447538	0.382651	0.399503	0.443603	0.388538	0.43223	0.39976	0.372447	0.329896	0.261265	0.266127	0.478878	0.370162	0.425834	0.371019	0.386255	0.413036	0.400403	0.494536	0.402521	0.434042	0.47789	0.501383	0.326173	0.365147	0.478824	0.0426645	0.394465	0.485493	0.318557	0.473726	0.296923	0.333472	0.292406	0.444624	0.521389	0.456196	0.260947	0.479153	0.415303	0.230921	0.463003	0.445902	0.298877	0.215475	0.514639	0.398002	0.446973
C1	0.493954	0.43431	0.364124	0.401037	0.43694	0.389587	0.441846	0.395291	0.348223	0.304647	0.148046	0.237876	0.445567	0.367005	0.434782	0.414255	0.391278	0.41005	0.36624	0.493264	0.420487	0.431374	0.474758	0.50703	0.371076	0.385695	0.506265	-8.12277e-05	0.395404	0.502606	0.298664	0.379803	0.360566	0.405614	0.359362	0.403833	0.494467	0.435276	0.205346	0.456972	0.396274	0.175217	0.410955	0.433323	0.262776	0.140994	0.514312	0.41303	0.453231
C2	0.500069	0.433662	0.357106	0.415967	0.418174	0.393542	0.456099	0.385136	0.349597	0.30673	0.212153	0.23749	0.454303	0.361023	0.414547	0.343364	0.383347	0.39049	0.354938	0.515278	0.399262	0.430452	0.436666	0.48468	0.32369	0.293205	0.457554	0.0289513	0.362765	0.471648	0.303645	0.337306	0.27215	0.305349	0.264442	0.42636	0.526109	0.463528	0.268606	0.472514	0.409349	0.233384	0.439252	0.483546	0.266222	0.189318	0.523873	0.389886	0.457746
C2	0.513181	0.437957	0.368005	0.423641	0.455523	0.374898	0.446685	0.386778	0.330981	0.295668	0.121239	0.222029	0.437183	0.382295	0.449587	0.394702	0.400652	0.411682	0.412209	0.496081	0.393319	0.415402	0.471993	0.507805	0.373118	0.334283	0.471986	0.0225843	0.381189	0.479938	0.370769	0.33662	0.35655	0.39029	0.3588	0.404653	0.505205	0.457178	0.154284	0.473796	0.414465	0.115771	0.421252	0.494218	0.272017	0.134283	0.515773	0.40708	0.455491
C2	0.48677	0.451926	0.301724	0.391908	0.447122	0.337966	0.443299	0.36198	0.288789	0.187427	0.0551632	0.155057	0.40775	0.312534	0.373133	0.37264	0.37877	0.360458	0.306587	0.508451	0.431257	0.468894	0.471971	0.479772	0.30468	0.204076	0.498151	0.00976579	0.276898	0.462428	0.250212	0.278135	0.286208	0.332868	0.28088	0.338549	0.466129	0.407453	-0.0572702	0.420659	0.374897	-0.117781	0.344458	0.471016	0.178205	0.00776615	0.488722	0.366205	0.452147
C2	0.501727	0.440255	0.319932	0.36303	0.405707	0.351443	0.466023	0.370091	0.300847	0.260814	0.152452	0.183044	0.421949	0.323866	0.375384	0.333702	0.437925	0.395348	0.373265	0.497862	0.406522	0.431544	0.46788	0.47145	0.356453	0.344936	0.449746	0.0952499	0.394267	0.472529	0.245393	0.29038	0.301258	0.342355	0.301227	0.387392	0.506809	0.44046	0.179344	0.42256	0.383678	0.145371	0.382065	0.531079	0.296219	0.152222	0.507987	0.394645	0.445582
C2	0.518917	0.431928	0.376622	0.366271	0.410535	0.398212	0.490871	0.357968	0.29945	0.246055	0.152122	0.158324	0.436826	0.304641	0.388853	0.396564	0.406004	0.419435	0.33983	0.510457	0.407789	0.415316	0.487508	0.493706	0.342362	0.306565	0.477772	-0.0225566	0.395236	0.460803	0.226707	0.251099	0.305292	0.355509	0.303949	0.410063	0.519509	0.453748	0.158346	0.465485	0.372623	0.116469	0.437805	0.481326	0.296891	0.129168	0.525478	0.398034	0.439075
C1	0.492425	0.459324	0.364411	0.37747	0.466374	0.376369	0.441257	0.38092	0.322478	0.302397	0.195789	0.220045	0.440761	0.368376	0.42579	0.374912	0.379281	0.369084	0.364969	0.497412	0.413015	0.421317	0.469842	0.506302	0.330309	0.27908	0.526114	0.0740112	0.362619	0.471312	0.245353	0.318261	0.30948	0.336271	0.299401	0.419016	0.508096	0.454694	0.170562	0.465665	0.394972	0.139195	0.442837	0.461225	0.260514	0.146295	0.51143	0.395258	0.449797
C2	0.496283	0.431551	0.335496	0.338842	0.418759	0.37725	0.446732	0.387366	0.352079	0.293405	0.165784	0.25076	0.433186	0.32852	0.395348	0.364954	0.363777	0.365217	0.329305	0.498443	0.413636	0.426441	0.467933	0.484575	0.354395	0.288361	0.519885	0.0775691	0.392991	0.469224	0.27974	0.295044	0.325938	0.362859	0.32167	0.412107	0.507991	0.454201	0.0809506	0.438427	0.392034	0.0551341	0.405186	0.503734	0.249939	0.0916472	0.508934	0.38657	0.430235
C1	0.494869	0.43763	0.396534	0.391591	0.471955	0.390664	0.430904	0.394029	0.355739	0.298333	0.166486	0.247201	0.448983	0.357364	0.418311	0.397287	0.390995	0.409059	0.378272	0.507506	0.416225	0.418501	0.463812	0.489901	0.350049	0.378959	0.504886	0.0688505	0.345819	0.481375	0.274853	0.332625	0.354422	0.391763	0.353156	0.411024	0.510962	0.440451	0.152408	0.437323	0.379545	0.129836	0.422855	0.435354	0.296068	0.139048	0.506708	0.410796	0.452066
C2	0.487759	0.44386	0.347867	0.387429	0.423795	0.370035	0.417565	0.380932	0.351194	0.310743	0.173344	0.25774	0.432811	0.335291	0.404205	0.387277	0.361142	0.368775	0.338847	0.474702	0.392524	0.410336	0.465594	0.487715	0.31446	0.308571	0.494607	0.0849527	0.315593	0.467739	0.25698	0.459976	0.302582	0.35079	0.308211	0.400215	0.47544	0.431665	0.120409	0.42444	0.35721	0.108229	0.437526	0.412666	0.269616	0.128521	0.495506	0.373375	0.419839
C1	0.478666	0.455559	0.381569	0.39362	0.427165	0.402842	0.442662	0.38363	0.364668	0.307502	0.260094	0.273721	0.44319	0.356502	0.414827	0.356389	0.360717	0.354333	0.338177	0.479441	0.405836	0.406932	0.459859	0.488539	0.343692	0.246633	0.504399	-0.00258462	0.368514	0.459982	0.306451	0.285872	0.296335	0.311298	0.286185	0.413074	0.495703	0.441112	0.153615	0.457814	0.385705	0.1247	0.424384	0.448831	0.247903	0.134197	0.531506	0.376115	0.43679
C2	0.49855	0.459313	0.34837	0.400439	0.448116	0.356883	0.437328	0.378229	0.340735	0.265006	0.148483	0.215029	0.459264	0.329546	0.43604	0.400854	0.377652	0.394131	0.371314	0.496031	0.399327	0.428886	0.473859	0.503872	0.327184	0.289665	0.499769	0.0590716	0.34463	0.47455	0.293567	0.450881	0.328728	0.372112	0.340493	0.397427	0.48331	0.423193	0.0573095	0.448949	0.374631	0.0131706	0.419552	0.433559	0.262539	0.0660444	0.486996	0.389165	0.441902
C2	0.482588	0.464776	0.339107	0.369315	0.471641	0.375911	0.458288	0.387895	0.343279	0.283726	0.20751	0.23197	0.466625	0.359038	0.402064	0.324822	0.396479	0.380456	0.38579	0.49109	0.400891	0.439967	0.457901	0.482529	0.313369	0.268532	0.517559	0.0678664	0.295978	0.467262	0.275225	0.31228	0.26097	0.293521	0.247315	0.404287	0.495657	0.450959	0.186712	0.447849	0.377439	0.168033	0.421216	0.477111	0.219585	0.1446	0.522403	0.3809	0.450964
C1	0.4963	0.430667	0.365867	0.387031	0.481018	0.385461	0.457683	0.38387	0.342125	0.292635	0.207	0.22544	0.443559	0.378658	0.415373	0.367368	0.371581	0.390855	0.365716	0.50599	0.41252	0.43559	0.477182	0.491513	0.337565	0.300333	0.46473	0.0647468	0.373276	0.476566	0.311339	0.415757	0.313085	0.341047	0.314161	0.408345	0.490186	0.44817	0.181855	0.469446	0.384266	0.154432	0.430395	0.487334	0.261375	0.151457	0.509174	0.398223	0.449485
C2	0.497353	0.428001	0.345498	0.390435	0.391217	0.391379	0.467009	0.377791	0.333299	0.291173	0.20295	0.223639	0.433389	0.341649	0.38732	0.328818	0.377645	0.383219	0.362793	0.526157	0.442549	0.439199	0.478627	0.48467	0.305346	0.300001	0.458564	0.0137806	0.355832	0.467951	0.282749	0.361908	0.277147	0.316411	0.264068	0.419106	0.52873	0.454811	0.207064	0.47202	0.390197	0.164943	0.427651	0.507212	0.318149	0.168792	0.516882	0.403498	0.46091
C1	0.497352	0.435333	0.378549	0.411198	0.462217	0.385297	0.432809	0.39277	0.350076	0.295856	0.181214	0.241954	0.442627	0.361114	0.431658	0.427211	0.390015	0.412572	0.356325	0.490572	0.402451	0.398845	0.466553	0.502266	0.361392	0.35934	0.492891	0.0339046	0.390021	0.484	0.30398	0.401242	0.362039	0.396627	0.363149	0.421461	0.503248	0.459373	0.120994	0.4648	0.377378	0.0720294	0.42973	0.429145	0.305373	0.147727	0.50934	0.40527	0.440352
C2	0.50217	0.47275	0.371655	0.400243	0.454605	0.398447	0.456587	0.391256	0.359731	0.294577	0.20712	0.241306	0.470614	0.372458	0.418016	0.372776	0.379081	0.388659	0.393091	0.523413	0.43346	0.43638	0.474285	0.498426	0.325812	0.323306	0.463696	0.0269226	0.37181	0.487408	0.292304	0.339586	0.303594	0.338623	0.296068	0.42574	0.532929	0.458303	0.184958	0.497622	0.424816	0.145271	0.435196	0.48435	0.278262	0.168405	0.522624	0.410599	0.461176
C1	0.501721	0.454156	0.367439	0.399686	0.461463	0.378295	0.449794	0.371912	0.311144	0.256752	0.147064	0.170986	0.457619	0.408014	0.432376	0.37869	0.381664	0.36136	0.352742	0.51795	0.415058	0.427278	0.472495	0.500917	0.323232	0.274297	0.484303	0.00603258	0.361844	0.465446	0.285349	0.35334	0.316405	0.340838	0.298063	0.411501	0.500329	0.462641	0.147255	0.47368	0.403852	0.0875034	0.422298	0.463182	0.25878	0.102977	0.517214	0.39348	0.456018
C1	0.486202	0.421947	0.334307	0.388923	0.43052	0.355977	0.448559	0.383227	0.335873	0.266933	0.159676	0.219802	0.447945	0.313027	0.363323	0.354909	0.398099	0.38675	0.369887	0.5134	0.418658	0.428136	0.473496	0.489824	0.328788	0.331293	0.481602	0.00533524	0.355854	0.476148	0.287593	0.320714	0.312186	0.37035	0.30772	0.385899	0.49754	0.440873	0.0262587	0.444733	0.370005	-0.012749	0.391882	0.450505	0.225483	0.0477008	0.51133	0.396558	0.459094
C1	0.468134	0.445631	0.317267	0.414886	0.376268	0.344672	0.437787	0.368836	0.314443	0.270035	0.18645	0.205405	0.428126	0.309646	0.342202	0.334873	0.351015	0.364268	0.361653	0.502478	0.419396	0.430648	0.466099	0.4896	0.322528	0.283674	0.491557	0.0363963	0.340555	0.470678	0.262741	0.324477	0.29284	0.326465	0.286286	0.39837	0.499213	0.461534	0.180954	0.467906	0.384445	0.153815	0.394141	0.442205	0.206894	0.147266	0.510521	0.37824	0.455703
C1	0.509637	0.433305	0.401252	0.427742	0.471315	0.372369	0.454638	0.387263	0.360054	0.30561	0.203965	0.257456	0.444403	0.389728	0.446222	0.401773	0.392871	0.398554	0.373789	0.51389	0.408124	0.440541	0.476251	0.508927	0.342381	0.35316	0.459473	0.0584264	0.381628	0.488739	0.313196	0.401658	0.334894	0.357605	0.323261	0.421216	0.503768	0.433313	0.102054	0.468545	0.411298	0.0525876	0.426078	0.454304	0.253809	0.10416	0.517746	0.406515	0.461089
C2	0.494826	0.452775	0.36787	0.378297	0.466901	0.3767	0.444376	0.401082	0.35658	0.313979	0.219036	0.258309	0.451167	0.36474	0.389466	0.367177	0.396702	0.378966	0.348516	0.511368	0.412215	0.435956	0.467213	0.483663	0.309418	0.279018	0.498929	0.0755245	0.330924	0.477357	0.288459	0.310868	0.287948	0.326276	0.289103	0.413263	0.506868	0.449299	0.221013	0.471187	0.372945	0.207529	0.421958	0.512375	0.299347	0.194162	0.519939	0.394516	0.448337
C1	0.496517	0.398991	0.363334	0.398497	0.418557	0.387346	0.449688	0.38908	0.335912	0.281848	0.209585	0.226891	0.434534	0.375565	0.389409	0.333344	0.378551	0.340324	0.339102	0.506597	0.427515	0.436287	0.462038	0.478403	0.328128	0.276058	0.507328	0.0227421	0.343333	0.460285	0.311931	0.338867	0.293096	0.331379	0.290899	0.395179	0.500815	0.454395	0.179767	0.476012	0.376681	0.138945	0.407712	0.425518	0.198297	0.124338	0.518596	0.393707	0.451627
C2	0.49243	0.454541	0.35115	0.4094	0.448836	0.381151	0.453267	0.392741	0.34903	0.28595	0.184913	0.22975	0.463777	0.357921	0.402394	0.367072	0.358424	0.371758	0.345893	0.501128	0.416251	0.440209	0.484249	0.514884	0.309281	0.283255	0.498528	0.0674265	0.297107	0.462233	0.294259	0.378224	0.271495	0.30569	0.271412	0.397571	0.503498	0.445319	0.228749	0.467555	0.399994	0.203844	0.413647	0.466823	0.243475	0.153363	0.515572	0.38156	0.447909
C2	0.492886	0.441106	0.415513	0.399526	0.468271	0.384834	0.438019	0.409101	0.394614	0.331212	0.267149	0.290263	0.464063	0.370686	0.426502	0.358302	0.385284	0.39116	0.356437	0.500666	0.395207	0.429739	0.475822	0.490242	0.3199	0.301773	0.509223	0.0674763	0.370323	0.473931	0.244379	0.35714	0.31148	0.351421	0.307716	0.442837	0.512227	0.455961	0.221259	0.481182	0.402627	0.200824	0.465064	0.47123	0.252568	0.171906	0.507976	0.399304	0.442266
C1	0.496447	0.432239	0.344303	0.372447	0.446833	0.378292	0.459933	0.387227	0.327703	0.270341	0.146307	0.208859	0.44389	0.34512	0.405246	0.356092	0.38135	0.389392	0.376491	0.526558	0.417016	0.435269	0.459343	0.495123	0.321579	0.301219	0.481236	0.0556924	0.374628	0.487805	0.350153	0.397138	0.300666	0.344418	0.3037	0.414844	0.53254	0.438568	0.194142	0.461186	0.395792	0.15609	0.433688	0.472094	0.257837	0.139811	0.510625	0.393061	0.462751
C1	0.493276	0.459138	0.407471	0.415769	0.49668	0.367062	0.430895	0.385014	0.352566	0.292269	0.177695	0.241392	0.443923	0.36414	0.398453	0.381979	0.369649	0.377752	0.354431	0.49479	0.406862	0.40422	0.464706	0.491174	0.326988	0.32082	0.48347	0.0913943	0.315562	0.466772	0.286126	0.38601	0.32044	0.350159	0.318452	0.395629	0.495609	0.433896	0.215707	0.465869	0.395268	0.181772	0.411899	0.448411	0.264298	0.15231	0.513777	0.391559	0.441446
C1	0.471271	0.416617	0.330157	0.360305	0.418862	0.338014	0.428789	0.37004	0.311573	0.241647	0.144549	0.190318	0.430961	0.329224	0.377156	0.351375	0.401614	0.353741	0.363005	0.505444	0.419644	0.426351	0.476526	0.48346	0.332272	0.242383	0.448536	-0.0284255	0.290722	0.465552	0.319886	0.322221	0.295472	0.327982	0.295124	0.373658	0.47194	0.407171	-0.0167862	0.427785	0.379614	-0.0522466	0.390725	0.419423	0.184237	-0.00306473	0.517879	0.37711	0.46019
C2	0.491129	0.422795	0.339107	0.377365	0.454378	0.385344	0.4493	0.384889	0.320931	0.266492	0.142119	0.182504	0.437979	0.330121	0.427059	0.382554	0.395783	0.399948	0.366515	0.506349	0.403718	0.441074	0.469963	0.492567	0.320526	0.244443	0.492237	0.0619616	0.371786	0.479893	0.288825	0.431165	0.300622	0.342251	0.300647	0.412295	0.502309	0.462332	0.154487	0.482714	0.392337	0.115554	0.405857	0.444541	0.226615	0.133128	0.510115	0.397718	0.456115
C1	0.498806	0.433348	0.371137	0.423044	0.464999	0.364436	0.438325	0.385039	0.339426	0.274719	0.153701	0.224095	0.437739	0.328089	0.408863	0.402881	0.394326	0.399673	0.363467	0.49786	0.399636	0.417921	0.47247	0.498376	0.347124	0.33486	0.505833	0.0347124	0.375077	0.462367	0.259067	0.401841	0.353555	0.388314	0.357047	0.405057	0.490026	0.447565	0.144087	0.453865	0.383487	0.107181	0.429119	0.428622	0.308666	0.125667	0.503417	0.404876	0.455429
C1	0.491333	0.43571	0.355846	0.409236	0.465108	0.386743	0.442131	0.39784	0.354075	0.321234	0.211274	0.259933	0.434012	0.371136	0.416391	0.393978	0.375554	0.389653	0.355434	0.511449	0.412725	0.434302	0.462122	0.492966	0.352118	0.35458	0.474924	0.00982541	0.3812	0.476725	0.303579	0.357183	0.328941	0.361445	0.321162	0.413702	0.500687	0.469814	0.227903	0.473726	0.386671	0.213782	0.419799	0.473204	0.263967	0.185828	0.521984	0.401137	0.45818
C2	0.480997	0.432626	0.389574	0.427348	0.45303	0.348091	0.420613	0.375203	0.329468	0.298072	0.159561	0.215765	0.428318	0.345634	0.419249	0.399091	0.394347	0.370004	0.339442	0.483102	0.404793	0.414753	0.475099	0.487934	0.341991	0.360754	0.487046	0.05899	0.30792	0.469025	0.236335	0.336459	0.345586	0.378477	0.340673	0.390708	0.484014	0.422506	0.0659432	0.443268	0.364788	0.0494094	0.410135	0.423648	0.248498	0.0849048	0.512032	0.389309	0.430038
C1	0.482442	0.416955	0.344424	0.39413	0.435362	0.352791	0.419714	0.376556	0.315316	0.254476	0.0898594	0.203985	0.413685	0.31825	0.409931	0.412762	0.380487	0.385919	0.338045	0.472625	0.399223	0.412038	0.468448	0.488394	0.346159	0.372372	0.519925	0.0682684	0.328925	0.480966	0.253567	0.441689	0.368618	0.413579	0.366226	0.368632	0.475094	0.419922	0.0746575	0.407913	0.363726	0.0462438	0.406759	0.367322	0.240308	0.0540994	0.487539	0.388485	0.415071
C1	0.47751	0.420393	0.332822	0.38431	0.424311	0.341787	0.423639	0.36495	0.330104	0.284467	0.12901	0.200347	0.412482	0.308128	0.402119	0.363839	0.381259	0.366167	0.34947	0.494174	0.411412	0.411652	0.465699	0.493665	0.328547	0.257718	0.482144	-0.0140989	0.310896	0.467205	0.283153	0.411776	0.287654	0.317345	0.281079	0.371394	0.479182	0.420951	0.148116	0.424134	0.37869	0.102113	0.370701	0.453359	0.237229	0.111	0.517573	0.384493	0.441515
C1	0.481435	0.408685	0.365427	0.400716	0.424129	0.362504	0.436042	0.379513	0.332401	0.272133	0.167742	0.222364	0.421958	0.320025	0.374741	0.386105	0.381318	0.404256	0.332056	0.491905	0.433114	0.416326	0.473478	0.488772	0.361136	0.313157	0.51518	0.0444939	0.35029	0.471665	0.312719	0.364206	0.353139	0.403515	0.35344	0.390358	0.504278	0.440404	0.0952914	0.440848	0.363789	0.043509	0.420378	0.416252	0.243308	0.0825674	0.51692	0.403077	0.442523
C2	0.490666	0.426666	0.372511	0.389262	0.447739	0.348918	0.446333	0.377706	0.346631	0.273997	0.168185	0.239928	0.418465	0.349677	0.413854	0.374571	0.40087	0.35828	0.365582	0.509547	0.418513	0.433753	0.466112	0.482215	0.333763	0.278247	0.459798	0.0365075	0.336733	0.470222	0.290233	0.359119	0.29901	0.3361	0.295507	0.404978	0.488742	0.458075	0.184156	0.465117	0.378384	0.16471	0.421595	0.478368	0.2428	0.129468	0.522302	0.385243	0.451766
C2	0.502532	0.422007	0.291139	0.388756	0.427827	0.356422	0.459975	0.371995	0.319312	0.251771	0.150394	0.191852	0.452505	0.320442	0.363338	0.337179	0.398474	0.365172	0.384589	0.532247	0.435355	0.441937	0.473255	0.487393	0.290277	0.263783	0.451347	0.00272646	0.323659	0.468629	0.316888	0.385005	0.259093	0.305389	0.250721	0.403756	0.524756	0.460555	0.115504	0.470835	0.407222	0.0823476	0.422689	0.495402	0.260556	0.107704	0.520959	0.399266	0.470163
C1	0.492854	0.443872	0.360262	0.406392	0.425618	0.376476	0.451425	0.369253	0.331913	0.271947	0.173468	0.195817	0.439092	0.367609	0.444578	0.364268	0.368103	0.355169	0.354606	0.502579	0.406959	0.409145	0.474467	0.508794	0.308365	0.286912	0.469652	-0.0175646	0.336245	0.46755	0.242258	0.397715	0.301322	0.3354	0.293931	0.41371	0.50083	0.437889	0.165406	0.462102	0.407552	0.120063	0.421846	0.445232	0.26218	0.126766	0.520235	0.383525	0.440251
C2	0.488179	0.436576	0.353864	0.38473	0.450551	0.362576	0.439324	0.363044	0.316106	0.249521	0.15852	0.182757	0.427004	0.357181	0.405595	0.337572	0.369717	0.364406	0.326402	0.508383	0.389403	0.418841	0.458713	0.486117	0.328957	0.214413	0.469396	0.0207025	0.311374	0.471553	0.327732	0.368067	0.286619	0.326449	0.291773	0.395239	0.500623	0.453662	0.0644968	0.468275	0.391815	0.00996618	0.404647	0.426308	0.191784	0.0535149	0.515476	0.382253	0.45619
C2	0.48823	0.420431	0.372366	0.389242	0.424499	0.35815	0.426775	0.373108	0.349958	0.30451	0.193281	0.223819	0.436784	0.374831	0.451311	0.375876	0.377179	0.383271	0.344602	0.487173	0.395975	0.415365	0.47241	0.48806	0.319996	0.291078	0.494999	0.0471933	0.349038	0.471602	0.250481	0.462037	0.312835	0.354318	0.311096	0.415802	0.481805	0.435888	0.0909949	0.449682	0.364067	0.0621213	0.445339	0.41253	0.24955	0.0799843	0.517738	0.387976	0.428776
C1	0.494428	0.437464	0.315907	0.388599	0.429129	0.372071	0.436792	0.359255	0.325778	0.250479	0.11458	0.186898	0.450529	0.356824	0.407162	0.339707	0.382899	0.358763	0.368891	0.518611	0.4237	0.432107	0.459492	0.48631	0.287703	0.215725	0.469317	-0.0320174	0.340731	0.466184	0.319618	0.410253	0.239509	0.299955	0.240053	0.415404	0.498787	0.433967	0.130316	0.434968	0.384992	0.0825714	0.43677	0.450309	0.260968	0.0914923	0.510386	0.374734	0.451905
C1	0.496578	0.440478	0.382162	0.419967	0.444119	0.403569	0.431985	0.381129	0.346068	0.30634	0.165128	0.212662	0.457273	0.393317	0.468027	0.390819	0.381483	0.384215	0.363052	0.499884	0.407272	0.422606	0.469666	0.503215	0.328033	0.291685	0.491919	0.00644194	0.338309	0.472718	0.312959	0.438237	0.325147	0.365766	0.328612	0.425169	0.489597	0.456646	0.142166	0.465233	0.393462	0.110835	0.441302	0.439167	0.286767	0.128679	0.513791	0.401784	0.448192
C1	0.496368	0.445781	0.359281	0.392356	0.430665	0.364921	0.439476	0.380873	0.329174	0.282789	0.132248	0.209285	0.429512	0.317053	0.409433	0.379338	0.354098	0.366633	0.340097	0.498223	0.423201	0.420245	0.45803	0.485019	0.368389	0.313866	0.50163	0.042964	0.385868	0.49056	0.283314	0.317063	0.350512	0.387375	0.3447	0.389053	0.502645	0.456371	0.0336483	0.43965	0.36991	-0.0241344	0.391272	0.456854	0.233283	0.0549269	0.498043	0.390942	0.43714
C2	0.480351	0.464404	0.288905	0.359587	0.411993	0.333437	0.45158	0.375535	0.332989	0.236172	0.114945	0.244054	0.438501	0.333158	0.405645	0.328496	0.413513	0.333941	0.324443	0.521245	0.426074	0.443219	0.456504	0.483415	0.291323	0.243831	0.518169	0.0448917	0.305105	0.470123	0.290915	0.344029	0.257397	0.309184	0.248634	0.36502	0.50488	0.403261	0.00842895	0.420522	0.372979	-0.0519842	0.375813	0.472209	0.197619	0.0109863	0.498734	0.368905	0.461035
C1	0.497594	0.423069	0.369443	0.419178	0.489231	0.375808	0.442769	0.385716	0.357405	0.34385	0.233109	0.25074	0.459136	0.372392	0.429996	0.366181	0.37055	0.377743	0.378298	0.497655	0.400355	0.420908	0.467984	0.503888	0.33526	0.319155	0.50107	0.00701682	0.35	0.473121	0.320684	0.429905	0.319618	0.350475	0.319361	0.421459	0.502513	0.449318	0.214303	0.462168	0.380094	0.184662	0.451287	0.446829	0.31263	0.173122	0.511016	0.389136	0.441624
C2	0.486159	0.43066	0.358505	0.404465	0.423721	0.35964	0.446886	0.382683	0.346021	0.284151	0.201587	0.216115	0.442183	0.329551	0.409098	0.379505	0.38189	0.406518	0.380889	0.49519	0.42021	0.420674	0.481991	0.506978	0.338424	0.349157	0.506401	0.0446157	0.329709	0.485073	0.22058	0.375641	0.357909	0.38166	0.353578	0.420109	0.489462	0.433903	0.0712735	0.459527	0.378314	0.0215727	0.445969	0.420294	0.253078	0.114922	0.495512	0.403463	0.447661
C2	0.495854	0.421316	0.262692	0.362828	0.420643	0.357025	0.449717	0.367862	0.305614	0.197862	0.0448607	0.179258	0.410423	0.314207	0.354528	0.324212	0.40015	0.353793	0.338855	0.516753	0.437768	0.446416	0.454523	0.470062	0.322504	0.213806	0.479669	0.0565984	0.30881	0.47555	0.278924	0.326167	0.307027	0.332462	0.305211	0.359707	0.503439	0.426099	-0.0180657	0.422421	0.354397	-0.0583136	0.364627	0.475457	0.193275	0.034455	0.505459	0.384176	0.465402
C1	0.497878	0.439601	0.372748	0.390761	0.466477	0.343637	0.460608	0.369541	0.329347	0.271893	0.140746	0.205135	0.423316	0.371235	0.417157	0.370005	0.367401	0.360652	0.296149	0.493154	0.408248	0.421785	0.470378	0.490781	0.335888	0.249491	0.479922	0.0454236	0.323741	0.461166	0.239313	0.344089	0.301976	0.344004	0.293739	0.38419	0.4711	0.433046	0.0404267	0.431892	0.35935	-0.00328116	0.40074	0.445465	0.273028	0.0653719	0.517187	0.386387	0.436831
C1	0.503898	0.462012	0.387793	0.406322	0.481476	0.402514	0.445735	0.408127	0.402337	0.366179	0.282868	0.32115	0.472663	0.380054	0.400202	0.366268	0.381099	0.413187	0.39426	0.517944	0.39612	0.429795	0.467953	0.500723	0.326659	0.375786	0.469048	0.042814	0.373418	0.473768	0.309534	0.400632	0.307531	0.336037	0.302537	0.443412	0.522656	0.447382	0.250351	0.488416	0.415264	0.239304	0.479003	0.483765	0.318382	0.216772	0.515449	0.406335	0.456018
C2	0.488005	0.429222	0.356625	0.343488	0.434567	0.382751	0.449203	0.395645	0.36325	0.301184	0.208122	0.255154	0.428106	0.347992	0.425272	0.336969	0.384747	0.383145	0.376143	0.514038	0.421203	0.440304	0.479164	0.482106	0.317228	0.286721	0.481289	0.0118536	0.359088	0.47572	0.286436	0.364315	0.300208	0.336891	0.294602	0.40032	0.505536	0.469723	0.171538	0.469322	0.387972	0.131745	0.375451	0.496254	0.222633	0.141232	0.5022	0.393757	0.445231
C1	0.499836	0.473764	0.336449	0.416577	0.470988	0.361161	0.459338	0.383828	0.323164	0.264947	0.0917357	0.185227	0.442921	0.352521	0.434987	0.39532	0.387908	0.386696	0.353535	0.510647	0.409764	0.439352	0.463541	0.506891	0.335727	0.32802	0.474704	-0.00825241	0.320669	0.469427	0.336327	0.333453	0.325529	0.351434	0.322432	0.362796	0.480965	0.444303	0.112352	0.438503	0.388521	0.0630204	0.364912	0.448839	0.28342	0.0935296	0.50522	0.385711	0.462071
C1	0.476434	0.424289	0.345695	0.402071	0.422219	0.343766	0.43638	0.382386	0.321335	0.243856	0.102744	0.230875	0.40445	0.301813	0.386992	0.405362	0.380172	0.411624	0.324269	0.484912	0.41715	0.417457	0.480317	0.483285	0.382243	0.300953	0.519834	0.0818084	0.364327	0.458825	0.255692	0.369625	0.367412	0.40061	0.361733	0.387658	0.502798	0.411528	0.0529358	0.410725	0.359571	0.0263678	0.428046	0.402545	0.259848	0.0494926	0.519969	0.399101	0.434474
C1	0.487869	0.424973	0.344561	0.383699	0.428316	0.3565	0.443101	0.3775	0.340578	0.279077	0.190153	0.209999	0.441925	0.344755	0.398075	0.344226	0.383516	0.355649	0.35521	0.498275	0.405078	0.431919	0.472934	0.491444	0.318804	0.249967	0.498924	0.0579676	0.325111	0.477945	0.283346	0.439667	0.301228	0.346075	0.307211	0.404025	0.460268	0.436895	0.225971	0.453468	0.38849	0.19815	0.432368	0.421581	0.241594	0.159711	0.497699	0.377459	0.44022
C1	0.48671	0.429476	0.392317	0.382152	0.472103	0.351073	0.446848	0.365258	0.309192	0.273332	0.139644	0.15739	0.44818	0.369421	0.397813	0.323904	0.365101	0.366518	0.366029	0.485844	0.400349	0.418543	0.468191	0.501435	0.32115	0.226248	0.514323	0.0343247	0.301957	0.470921	0.237118	0.360235	0.323121	0.342334	0.311554	0.38281	0.474082	0.429223	0.147159	0.440868	0.386527	0.107105	0.37984	0.450171	0.209816	0.0921983	0.489226	0.366737	0.421935
C1	0.485959	0.419281	0.346281	0.381219	0.42807	0.347065	0.441779	0.373046	0.310201	0.271522	0.157606	0.177451	0.43326	0.332349	0.390046	0.357957	0.38816	0.399907	0.339592	0.500294	0.418109	0.431074	0.474112	0.483373	0.327544	0.276808	0.472172	-0.00497717	0.301017	0.47602	0.32546	0.324391	0.299865	0.335384	0.29107	0.403708	0.492201	0.445986	0.172786	0.454362	0.375218	0.151161	0.416136	0.459639	0.234187	0.153661	0.513727	0.388584	0.453635
C2	0.492762	0.436826	0.355732	0.403038	0.413934	0.379793	0.453294	0.393553	0.369569	0.306752	0.228011	0.259451	0.439501	0.327397	0.385938	0.364561	0.369125	0.377645	0.365953	0.516015	0.417699	0.430091	0.481059	0.503364	0.3198	0.329828	0.477737	0.0176952	0.345622	0.478094	0.232114	0.390666	0.310491	0.339425	0.305336	0.432722	0.503777	0.460228	0.225502	0.47641	0.390283	0.191539	0.437519	0.451739	0.247912	0.175387	0.514981	0.391071	0.446724
C1	0.495454	0.433298	0.364939	0.397025	0.466723	0.39211	0.437429	0.398843	0.378796	0.354085	0.260824	0.296923	0.460684	0.371864	0.416869	0.383757	0.379501	0.402322	0.370009	0.517157	0.418133	0.428324	0.4703	0.49279	0.337905	0.320961	0.47049	0.0469399	0.381939	0.479722	0.309273	0.400835	0.315461	0.345749	0.310507	0.42914	0.52098	0.458444	0.233199	0.476051	0.409847	0.209126	0.433535	0.477255	0.341255	0.239348	0.518536	0.403352	0.450105
C1	0.493751	0.423374	0.389019	0.399658	0.477148	0.342884	0.424106	0.36471	0.325418	0.269108	0.111905	0.19295	0.420742	0.350994	0.428032	0.40961	0.369834	0.404377	0.373732	0.487001	0.400197	0.406365	0.471141	0.496703	0.353967	0.36295	0.467933	0.0149568	0.350181	0.466721	0.334609	0.427047	0.338343	0.363414	0.342933	0.399501	0.486816	0.430961	0.0882363	0.439233	0.39989	0.0410911	0.41108	0.443971	0.296418	0.0991987	0.508853	0.40035	0.441431
C1	0.486718	0.408382	0.336922	0.379864	0.441571	0.372851	0.422782	0.382461	0.33542	0.290137	0.174176	0.231385	0.422901	0.31465	0.409149	0.384171	0.383621	0.404226	0.380275	0.492426	0.403125	0.427243	0.464704	0.484628	0.338689	0.329572	0.486924	0.0740971	0.337238	0.480195	0.287065	0.393005	0.332525	0.365047	0.336043	0.388186	0.483971	0.41374	0.00729402	0.430432	0.359512	-0.0412146	0.424865	0.422479	0.294755	0.0727103	0.501281	0.39774	0.45954
C2	0.499503	0.432262	0.358267	0.3562	0.443943	0.401156	0.440109	0.399582	0.364807	0.327675	0.215003	0.272501	0.433024	0.327147	0.412244	0.350982	0.36896	0.370011	0.352355	0.526785	0.417153	0.436405	0.450197	0.480367	0.336191	0.327676	0.461069	0.0626765	0.383429	0.485647	0.273193	0.409413	0.302997	0.331616	0.298048	0.414989	0.519886	0.480923	0.149641	0.460913	0.394906	0.10998	0.418042	0.488729	0.22763	0.120024	0.515776	0.405776	0.454364
C2	0.493573	0.424782	0.361842	0.390584	0.448371	0.363297	0.439384	0.392022	0.356737	0.297578	0.187522	0.250808	0.441543	0.341803	0.402423	0.380392	0.375863	0.381999	0.392651	0.512641	0.40782	0.426308	0.466997	0.495413	0.331379	0.284947	0.488096	0.0307379	0.339745	0.477417	0.273586	0.443191	0.318986	0.358227	0.320342	0.414323	0.48728	0.454108	0.064651	0.479653	0.403147	0.0141533	0.424589	0.460374	0.244079	0.0930183	0.509908	0.398861	0.460119
C1	0.500251	0.440144	0.386879	0.426156	0.494322	0.38233	0.434524	0.398006	0.36017	0.317587	0.200033	0.247383	0.453708	0.361544	0.433392	0.418981	0.382644	0.401571	0.375224	0.503364	0.405906	0.418853	0.469637	0.501184	0.343372	0.329522	0.477358	0.0419949	0.350618	0.476293	0.293372	0.356876	0.351821	0.381317	0.351117	0.417921	0.491257	0.457413	0.13785	0.469226	0.403492	0.107307	0.429799	0.428815	0.302425	0.118375	0.507893	0.401762	0.446452
C1	0.491983	0.446263	0.31817	0.37748	0.46461	0.355873	0.432979	0.378659	0.327391	0.288376	0.156208	0.201365	0.417874	0.330921	0.402332	0.384582	0.348853	0.384531	0.367698	0.497386	0.411687	0.411394	0.46708	0.498152	0.352082	0.268131	0.495673	0.0257477	0.384788	0.473976	0.309433	0.406754	0.327087	0.360642	0.321119	0.394899	0.503574	0.447435	0.159659	0.454069	0.390161	0.134913	0.40043	0.471826	0.24626	0.136189	0.518388	0.392533	0.448066
C2	0.498358	0.450116	0.324055	0.371257	0.406289	0.367123	0.455427	0.363722	0.303463	0.260317	0.143867	0.182173	0.447185	0.343596	0.352676	0.319031	0.354917	0.316365	0.33454	0.532164	0.429669	0.436243	0.457183	0.47952	0.311775	0.253929	0.431893	0.0228271	0.363033	0.464951	0.234644	0.315189	0.26571	0.308549	0.256622	0.43615	0.522979	0.464401	0.261764	0.464998	0.390099	0.247978	0.44884	0.443894	0.258148	0.192913	0.530374	0.394746	0.451363
C2	0.489602	0.433987	0.368107	0.375553	0.444799	0.389227	0.444725	0.390642	0.341281	0.276796	0.191494	0.226466	0.440571	0.348589	0.410823	0.333295	0.380551	0.357094	0.362538	0.502385	0.402774	0.435097	0.462031	0.479121	0.306708	0.251444	0.488272	0.0613929	0.332939	0.477789	0.285256	0.426726	0.277739	0.322828	0.275812	0.40852	0.493186	0.456407	0.257016	0.475558	0.38426	0.234151	0.416558	0.454193	0.179791	0.177539	0.504435	0.3874	0.449835
C2	0.490998	0.422082	0.28892	0.372399	0.41104	0.394147	0.437338	0.396983	0.377667	0.315856	0.194004	0.30252	0.439418	0.35071	0.413026	0.372334	0.387492	0.395476	0.361283	0.490565	0.423247	0.416448	0.483139	0.491556	0.331465	0.282661	0.486231	0.0282868	0.348494	0.469366	0.304951	0.440449	0.291963	0.329208	0.296213	0.38245	0.486632	0.425201	0.134327	0.442529	0.357881	0.0853367	0.418492	0.480191	0.271072	0.124843	0.515204	0.387271	0.456693
C2	0.476177	0.42099	0.300429	0.412129	0.390352	0.359829	0.461236	0.367864	0.307375	0.211348	0.11781	0.194095	0.412109	0.287874	0.310967	0.321656	0.37957	0.349714	0.340783	0.531122	0.434292	0.432323	0.469979	0.483407	0.300504	0.18865	0.488046	-0.0209151	0.290261	0.448846	0.2307	0.296697	0.268558	0.312275	0.265401	0.375464	0.501598	0.439738	0.159346	0.459279	0.396097	0.13667	0.389875	0.496496	0.172309	0.10366	0.507219	0.391816	0.456716
C1	0.486098	0.427063	0.372688	0.397938	0.433295	0.3645	0.422202	0.382852	0.342659	0.287606	0.190568	0.227917	0.439171	0.343412	0.405354	0.373491	0.37214	0.376563	0.34845	0.488216	0.391475	0.428362	0.464027	0.498515	0.318075	0.317098	0.506506	0.0834309	0.328683	0.481122	0.24119	0.482952	0.303938	0.349279	0.305697	0.389884	0.465607	0.434994	0.186909	0.442512	0.358253	0.166578	0.430183	0.410447	0.238974	0.15918	0.490241	0.389145	0.423923
C2	0.471045	0.397386	0.337412	0.370736	0.421859	0.337308	0.42376	0.375761	0.33011	0.274397	0.135207	0.24073	0.393565	0.339376	0.398831	0.397447	0.36204	0.388702	0.319518	0.479912	0.421327	0.423165	0.479107	0.466034	0.355566	0.291268	0.497593	0.0675997	0.325444	0.468649	0.226281	0.36556	0.355767	0.398903	0.349248	0.375358	0.479719	0.417904	-0.00509	0.404681	0.354833	-0.0380532	0.405197	0.365437	0.252671	0.0429102	0.509363	0.394266	0.42575
C1	0.499935	0.43918	0.369091	0.390915	0.450549	0.349576	0.460426	0.389883	0.337005	0.254526	0.154809	0.224758	0.430162	0.354872	0.406589	0.37315	0.380082	0.385122	0.353877	0.524588	0.430037	0.438829	0.471702	0.480682	0.323749	0.252963	0.473753	0.0608395	0.303518	0.463467	0.234683	0.280877	0.295138	0.335354	0.286831	0.39047	0.505856	0.441853	0.091511	0.455443	0.37386	0.0475463	0.400845	0.474338	0.242474	0.0776661	0.514904	0.414104	0.471651
C2	0.494504	0.43411	0.359123	0.350351	0.451357	0.367318	0.46191	0.369959	0.317082	0.257044	0.164127	0.183659	0.441633	0.34777	0.352822	0.299147	0.387768	0.368609	0.347214	0.513074	0.430815	0.445979	0.470227	0.480874	0.298861	0.278056	0.457757	0.0211295	0.329708	0.454856	0.220662	0.338948	0.263724	0.313823	0.255274	0.389784	0.515039	0.45376	0.151612	0.475978	0.378926	0.131001	0.382961	0.440417	0.259655	0.138116	0.511708	0.382548	0.450503
C1	0.477464	0.419461	0.362841	0.393641	0.434488	0.367045	0.425885	0.385461	0.332161	0.271224	0.143478	0.227279	0.41184	0.34449	0.422614	0.406807	0.391998	0.405479	0.350466	0.48187	0.405988	0.425891	0.472188	0.489746	0.360594	0.377907	0.517311	0.0822411	0.372888	0.485801	0.22843	0.365677	0.379443	0.419228	0.378262	0.397064	0.483611	0.407665	0.0419289	0.431082	0.369851	0.0207106	0.439553	0.376216	0.278249	0.0495741	0.492317	0.395714	0.430052
C1	0.482768	0.426331	0.359792	0.387365	0.421824	0.364572	0.438544	0.389982	0.355843	0.283375	0.234872	0.260788	0.439638	0.368174	0.39712	0.317751	0.388985	0.35589	0.34244	0.515812	0.400152	0.439725	0.464896	0.488052	0.309199	0.233678	0.49122	0.0590893	0.317396	0.470492	0.296145	0.40574	0.280979	0.31417	0.274755	0.429501	0.504873	0.452669	0.145437	0.487236	0.393865	0.111779	0.447422	0.471964	0.191016	0.108632	0.506365	0.392164	0.454684
C2	0.50237	0.44805	0.357756	0.381881	0.449854	0.397597	0.44993	0.413256	0.373733	0.336859	0.245354	0.3026	0.453998	0.360664	0.427732	0.372159	0.373821	0.398486	0.386969	0.51787	0.413159	0.427533	0.471713	0.494138	0.328281	0.309148	0.481312	-0.00449445	0.364028	0.471126	0.355493	0.297202	0.29687	0.332436	0.294854	0.412458	0.514747	0.446401	0.161687	0.487024	0.398388	0.109818	0.434267	0.480588	0.291969	0.152495	0.521978	0.400195	0.466664
C1	0.48127	0.416306	0.317972	0.366918	0.432917	0.344639	0.446964	0.359488	0.290121	0.271208	0.106543	0.154946	0.422131	0.35878	0.410544	0.377694	0.377787	0.342985	0.372105	0.510908	0.417977	0.439208	0.466625	0.482463	0.330526	0.357832	0.440886	-0.0335072	0.305307	0.456349	0.305375	0.279006	0.304971	0.351328	0.305918	0.386857	0.48161	0.414611	0.124249	0.415772	0.36293	0.0839674	0.42095	0.444043	0.224366	0.0947271	0.516863	0.397258	0.450419
C2	0.505368	0.431707	0.389764	0.394355	0.460531	0.37653	0.452733	0.390617	0.332617	0.254099	0.175788	0.225262	0.443019	0.365157	0.386286	0.356846	0.365827	0.362299	0.353908	0.510492	0.400723	0.436928	0.464916	0.488333	0.317493	0.22275	0.488993	0.0710364	0.345873	0.463781	0.250581	0.263565	0.293277	0.337988	0.292383	0.417546	0.500826	0.440917	0.0603678	0.475143	0.38852	0.0038514	0.407734	0.465285	0.210165	0.0360212	0.503181	0.386855	0.446473
C1	0.487193	0.440571	0.350709	0.404103	0.441154	0.358417	0.441458	0.383499	0.349811	0.294397	0.211276	0.25828	0.462381	0.353559	0.372697	0.335028	0.384602	0.344155	0.370629	0.525352	0.414278	0.443232	0.47185	0.4884	0.327617	0.206642	0.480551	0.0388048	0.33251	0.465153	0.286738	0.327735	0.282263	0.320799	0.275711	0.422227	0.513112	0.443174	0.109587	0.485172	0.379948	0.0835001	0.433171	0.450885	0.272287	0.103013	0.523814	0.388569	0.459015
C2	0.488885	0.439566	0.37604	0.373951	0.437926	0.389279	0.445754	0.393207	0.348252	0.320248	0.232113	0.222378	0.46087	0.358691	0.407408	0.355905	0.391059	0.420475	0.381122	0.491866	0.403314	0.430166	0.462215	0.488468	0.316888	0.34983	0.468407	0.0606939	0.338838	0.465214	0.293935	0.320833	0.289416	0.31921	0.285667	0.434345	0.490262	0.459258	0.325965	0.468485	0.386255	0.322614	0.453437	0.46265	0.250934	0.243525	0.521333	0.391319	0.455338
C1	0.49662	0.434046	0.371543	0.374621	0.482632	0.359304	0.441252	0.393535	0.351373	0.302649	0.219636	0.263512	0.435771	0.357465	0.427231	0.368254	0.400029	0.413504	0.371581	0.500149	0.395856	0.436688	0.470259	0.491721	0.317687	0.308677	0.515638	0.108245	0.325306	0.478289	0.244533	0.359492	0.30572	0.344682	0.299439	0.407639	0.48393	0.435058	0.0935747	0.456847	0.373504	0.0613446	0.410307	0.479725	0.276086	0.100241	0.506613	0.395326	0.450899
C2	0.490135	0.417763	0.357652	0.393345	0.427504	0.348573	0.445048	0.389201	0.378006	0.310064	0.229007	0.298998	0.449292	0.36758	0.414485	0.351115	0.373265	0.380426	0.37938	0.507891	0.420846	0.437868	0.470561	0.492459	0.343952	0.311931	0.462763	-0.00876859	0.348669	0.463799	0.299772	0.372414	0.327485	0.365751	0.32699	0.40306	0.488938	0.440555	0.00599629	0.466505	0.37934	-0.0181029	0.413035	0.425482	0.231243	0.0596595	0.513579	0.394673	0.461947
C2	0.489761	0.425384	0.32948	0.395416	0.416244	0.342355	0.43794	0.369725	0.327396	0.276587	0.166102	0.225799	0.427306	0.331726	0.437347	0.336548	0.368061	0.338136	0.334809	0.508046	0.416826	0.424771	0.467478	0.489879	0.334983	0.269647	0.468164	0.0289347	0.289428	0.456538	0.295409	0.332461	0.288243	0.332622	0.28537	0.37058	0.482952	0.455209	0.0914561	0.45168	0.378777	0.0377783	0.380312	0.487442	0.204177	0.0756496	0.513273	0.379424	0.448764
C1	0.496256	0.433335	0.308948	0.403874	0.487685	0.324653	0.441246	0.360744	0.31405	0.221645	0.0450415	0.189633	0.415958	0.268798	0.359845	0.421928	0.37552	0.402633	0.375409	0.507715	0.400018	0.420189	0.466907	0.499488	0.320676	0.280504	0.492599	0.0373386	0.295949	0.469521	0.342817	0.443912	0.316336	0.35992	0.3181	0.343094	0.474782	0.414657	-0.0265465	0.41659	0.391665	-0.0849922	0.377114	0.427414	0.222451	-0.00650676	0.498842	0.395783	0.459952
C1	0.488625	0.441506	0.378582	0.38124	0.484846	0.388465	0.447076	0.387914	0.329249	0.285286	0.141418	0.197981	0.448733	0.3732	0.468763	0.378998	0.386179	0.390404	0.356279	0.503821	0.411648	0.428546	0.466192	0.483759	0.328645	0.328192	0.48368	0.0267998	0.359107	0.480484	0.262863	0.285888	0.321183	0.35898	0.320295	0.404545	0.51683	0.467706	0.16925	0.476326	0.380206	0.136435	0.396362	0.47651	0.281787	0.159393	0.509348	0.400954	0.454029
C2	0.483695	0.437776	0.315245	0.402311	0.433371	0.363674	0.440854	0.375615	0.308518	0.254577	0.0986352	0.186826	0.435967	0.343992	0.393986	0.363749	0.376724	0.354504	0.344122	0.511125	0.417315	0.443194	0.477516	0.495281	0.334386	0.302599	0.483568	0.0330639	0.288237	0.47074	0.321394	0.351165	0.296731	0.328603	0.291024	0.387443	0.490713	0.460282	0.115434	0.452667	0.387785	0.0699798	0.379138	0.442257	0.21256	0.0959484	0.522325	0.388441	0.464135
C2	0.497761	0.436769	0.359845	0.412916	0.451428	0.382295	0.436803	0.38291	0.333977	0.296065	0.201528	0.204216	0.444794	0.3595	0.402402	0.365941	0.37495	0.389752	0.36256	0.494439	0.400792	0.433615	0.46175	0.501435	0.316461	0.294311	0.477923	0.0581859	0.318937	0.477256	0.29059	0.437333	0.292247	0.322391	0.290158	0.39066	0.485577	0.426851	0.151104	0.461476	0.389109	0.111272	0.413784	0.451994	0.250758	0.143911	0.509895	0.38962	0.449946
C1	0.490027	0.446749	0.34253	0.394863	0.46348	0.364214	0.453503	0.402118	0.377081	0.303781	0.231519	0.299985	0.450906	0.350354	0.376852	0.359574	0.361923	0.375032	0.349404	0.528078	0.424299	0.433301	0.472478	0.484315	0.314532	0.292407	0.479356	0.0716048	0.336493	0.476023	0.308978	0.430046	0.280654	0.320717	0.277317	0.409325	0.517097	0.458616	0.113572	0.485261	0.38314	0.0959695	0.413298	0.454924	0.215454	0.0954985	0.512587	0.399375	0.461346
C1	0.488421	0.431746	0.284948	0.342736	0.395762	0.363929	0.443093	0.361312	0.317683	0.264878	0.167058	0.202917	0.438156	0.327465	0.339939	0.27379	0.341871	0.326084	0.25825	0.519636	0.426676	0.458515	0.450229	0.462803	0.299268	0.223453	0.450047	0.0229577	0.346777	0.458585	0.232254	0.277591	0.232025	0.284364	0.22291	0.392475	0.524497	0.422967	0.165755	0.450581	0.348022	0.154631	0.400584	0.481421	0.268026	0.12393	0.520341	0.362086	0.443559
C1	0.487708	0.430884	0.371075	0.399798	0.442663	0.400817	0.426232	0.394006	0.359006	0.309067	0.228853	0.28227	0.442048	0.375921	0.439686	0.415212	0.355511	0.398277	0.337262	0.483997	0.405031	0.402437	0.479079	0.488622	0.365032	0.340028	0.500283	0.0342169	0.388041	0.481604	0.289237	0.374561	0.364343	0.404971	0.367614	0.411023	0.494129	0.437546	0.0985495	0.448998	0.394985	0.0459579	0.425437	0.429054	0.272321	0.124988	0.508891	0.404246	0.442385
C2	0.492334	0.452909	0.310229	0.3888	0.466746	0.359893	0.446651	0.38669	0.357478	0.319679	0.20405	0.273968	0.440025	0.336693	0.386536	0.369897	0.383332	0.346431	0.332611	0.505202	0.410471	0.41668	0.451745	0.500424	0.345747	0.197436	0.496931	0.00792	0.361601	0.474973	0.335078	0.336977	0.29504	0.318266	0.289181	0.384817	0.504374	0.428315	0.0350211	0.447552	0.393154	-0.0173251	0.391497	0.461909	0.233905	0.0630436	0.525151	0.37904	0.440835
C2	0.499413	0.452809	0.374991	0.417088	0.469357	0.375957	0.44881	0.384276	0.327725	0.291776	0.187298	0.197404	0.465545	0.358264	0.429554	0.366235	0.3906	0.3569	0.355773	0.513928	0.412671	0.450298	0.465032	0.507439	0.311602	0.299238	0.478534	0.0356757	0.360612	0.471298	0.320714	0.331774	0.295556	0.339141	0.300214	0.427262	0.519904	0.455182	0.226593	0.480531	0.395473	0.206052	0.444029	0.456799	0.279467	0.184788	0.509073	0.393695	0.450322
C1	0.501503	0.439756	0.349361	0.412612	0.477076	0.3669	0.451563	0.390183	0.33593	0.280461	0.167674	0.240798	0.439491	0.357058	0.423548	0.389827	0.370843	0.379831	0.334308	0.501005	0.412461	0.414363	0.475715	0.493817	0.345735	0.252442	0.50273	0.0685745	0.338169	0.470037	0.326776	0.326851	0.331111	0.360366	0.328837	0.402207	0.510226	0.421988	0.113323	0.439011	0.365839	0.0789941	0.420736	0.464533	0.246102	0.0872509	0.516151	0.388994	0.448481
C2	0.490865	0.435449	0.39543	0.379331	0.463163	0.381335	0.438169	0.403132	0.381768	0.336361	0.27017	0.299768	0.451617	0.356084	0.382353	0.342218	0.374245	0.387648	0.341417	0.498173	0.409314	0.413465	0.457822	0.482846	0.347108	0.242868	0.497935	0.0890483	0.363411	0.46718	0.268046	0.328416	0.316159	0.338807	0.316486	0.421914	0.500647	0.47167	0.111344	0.472323	0.390153	0.0713235	0.425385	0.467721	0.207533	0.095653	0.508105	0.399854	0.446591
C1	0.492749	0.438386	0.391929	0.404271	0.478392	0.36678	0.437624	0.377581	0.327902	0.254681	0.124331	0.202866	0.425005	0.351294	0.421442	0.391886	0.387874	0.396872	0.365036	0.499228	0.405461	0.42639	0.475017	0.493591	0.325738	0.282774	0.474565	0.075423	0.270351	0.46896	0.262942	0.311425	0.316053	0.355649	0.314113	0.370765	0.475129	0.438754	0.066641	0.453808	0.39779	0.0189716	0.38413	0.457466	0.274432	0.0768949	0.508143	0.396342	0.45188
C2	0.483946	0.425185	0.339445	0.378553	0.431801	0.347585	0.466051	0.36755	0.308152	0.287358	0.182765	0.188648	0.445352	0.365632	0.365419	0.325641	0.368464	0.364984	0.331721	0.506358	0.418359	0.433508	0.463849	0.491429	0.336024	0.280601	0.478926	0.0346141	0.344524	0.458921	0.306467	0.352927	0.31851	0.352484	0.315541	0.401137	0.489693	0.430612	0.265305	0.444369	0.368496	0.251835	0.40337	0.477631	0.258761	0.225114	0.508304	0.377726	0.451375
C2	0.495203	0.436599	0.358703	0.397917	0.442838	0.371131	0.461206	0.394136	0.360079	0.31316	0.230629	0.257467	0.455595	0.3576	0.38185	0.318174	0.397789	0.368726	0.334805	0.51248	0.407428	0.435367	0.464785	0.488995	0.322441	0.285511	0.476413	0.0469411	0.324041	0.458941	0.262718	0.3161	0.288218	0.32778	0.276922	0.429213	0.520843	0.468154	0.202257	0.475584	0.386053	0.1685	0.456194	0.471743	0.240279	0.162122	0.515705	0.391328	0.458815
C2	0.501317	0.456674	0.335123	0.412814	0.462086	0.370806	0.453944	0.375265	0.330422	0.25657	0.0934523	0.202662	0.454973	0.331789	0.457892	0.392549	0.382879	0.353203	0.356798	0.503173	0.395967	0.415656	0.467599	0.515308	0.301387	0.258771	0.467961	0.0504686	0.302759	0.467991	0.333733	0.430194	0.287825	0.325068	0.288482	0.393808	0.481554	0.446576	0.153785	0.459027	0.391052	0.100125	0.406684	0.459199	0.240528	0.0673001	0.5055	0.383186	0.442538
C1	0.495102	0.4172	0.313795	0.376546	0.428232	0.350693	0.449188	0.374728	0.32806	0.298213	0.192313	0.217263	0.432266	0.345714	0.391378	0.324947	0.380439	0.381667	0.340799	0.51672	0.426675	0.45143	0.475599	0.485996	0.32882	0.255862	0.457575	0.0457944	0.365916	0.473696	0.264927	0.374526	0.288962	0.334442	0.286799	0.396202	0.514071	0.453783	0.133966	0.451495	0.389999	0.114348	0.424108	0.443789	0.216084	0.0997597	0.503921	0.391003	0.447387
C1	0.495332	0.438175	0.394849	0.41088	0.418252	0.370965	0.449175	0.37691	0.334112	0.274328	0.188124	0.199633	0.440822	0.361809	0.426878	0.380002	0.394329	0.387019	0.321207	0.513506	0.424495	0.426179	0.476197	0.496238	0.340321	0.261885	0.479186	0.085577	0.365983	0.488649	0.234143	0.34296	0.324141	0.35205	0.310984	0.411854	0.52599	0.462557	0.176627	0.471933	0.391602	0.13698	0.434071	0.474852	0.218054	0.138341	0.513124	0.401493	0.450702
C1	0.487814	0.433759	0.374554	0.396114	0.463453	0.378795	0.421219	0.391568	0.370804	0.334785	0.223274	0.259914	0.440265	0.361437	0.416072	0.392215	0.369837	0.39586	0.381285	0.498508	0.398599	0.422028	0.468844	0.49883	0.338434	0.368706	0.474231	-0.0136808	0.390109	0.474282	0.314953	0.459732	0.303873	0.337133	0.301532	0.444046	0.506334	0.476794	0.211404	0.478072	0.39358	0.190574	0.454161	0.4541	0.292958	0.192805	0.520911	0.401512	0.44597
C2	0.488962	0.444473	0.338748	0.393848	0.450123	0.349187	0.461735	0.368726	0.319851	0.243795	0.122464	0.188439	0.434719	0.342144	0.379179	0.335544	0.398521	0.359615	0.353622	0.518188	0.420948	0.432472	0.460595	0.485243	0.300768	0.220363	0.477903	0.0202001	0.333244	0.467204	0.292468	0.37416	0.259042	0.307589	0.254066	0.402278	0.511813	0.451268	0.198466	0.469523	0.368047	0.166017	0.409275	0.446136	0.240741	0.134471	0.516626	0.391952	0.458576
C1	0.494597	0.434409	0.389568	0.415586	0.465439	0.387114	0.436657	0.394162	0.354577	0.326596	0.22639	0.247477	0.447535	0.37965	0.443038	0.383907	0.377059	0.397129	0.363444	0.498235	0.408225	0.434745	0.469547	0.501305	0.348278	0.348985	0.489585	0.0291814	0.367553	0.484708	0.242032	0.389973	0.334996	0.377326	0.331345	0.428394	0.502768	0.470537	0.187532	0.470053	0.389721	0.16438	0.442789	0.44433	0.291838	0.159428	0.519132	0.402585	0.443679
C2	0.493554	0.402233	0.380565	0.384874	0.468991	0.369306	0.450976	0.379285	0.344154	0.271697	0.21085	0.236804	0.435881	0.350446	0.410415	0.338955	0.386806	0.353679	0.370611	0.515105	0.423873	0.43949	0.467623	0.485715	0.310295	0.304781	0.470554	0.0228894	0.328185	0.455371	0.290111	0.354624	0.273746	0.314999	0.268845	0.418827	0.494344	0.435869	0.125827	0.453778	0.397414	0.0752855	0.436783	0.452202	0.226621	0.0741096	0.516656	0.391673	0.459154
C2	0.488697	0.43062	0.32504	0.364791	0.417619	0.368959	0.44189	0.385776	0.357919	0.316204	0.215679	0.252783	0.44617	0.32028	0.385818	0.340558	0.407621	0.394618	0.373632	0.520887	0.423872	0.458602	0.472242	0.490062	0.293392	0.314336	0.489321	0.00993644	0.365635	0.477857	0.274926	0.368869	0.258981	0.302096	0.252307	0.397923	0.537725	0.45041	0.0832668	0.45795	0.394417	0.0409602	0.409848	0.464378	0.231956	0.0883858	0.510047	0.387076	0.448702
C1	0.498121	0.400692	0.367823	0.380891	0.426925	0.356211	0.436323	0.394416	0.368691	0.28947	0.191931	0.276903	0.430601	0.339253	0.382565	0.367495	0.376916	0.390649	0.368363	0.516129	0.422266	0.418842	0.474635	0.484918	0.334067	0.296744	0.483942	0.0459602	0.3384	0.474688	0.293741	0.394134	0.329226	0.366813	0.325969	0.389227	0.496931	0.404652	0.0363959	0.442467	0.379925	0.0132666	0.419078	0.420023	0.243534	0.0696942	0.505727	0.405044	0.456186
C1	0.474133	0.418487	0.391388	0.398216	0.44999	0.351774	0.437697	0.39805	0.354853	0.313627	0.234372	0.271341	0.440575	0.382421	0.408346	0.317874	0.344593	0.371053	0.365865	0.490099	0.400844	0.418439	0.462843	0.488521	0.325385	0.256018	0.515378	0.0637402	0.341906	0.463532	0.23675	0.325205	0.298573	0.33931	0.299456	0.415057	0.484345	0.432925	0.138654	0.449783	0.374051	0.124562	0.43242	0.464735	0.243308	0.144042	0.517155	0.380049	0.44028
C1	0.485589	0.437961	0.37799	0.358179	0.444928	0.390983	0.431094	0.387113	0.363545	0.333896	0.248651	0.254482	0.467011	0.366207	0.418098	0.368025	0.3868	0.366729	0.355759	0.495553	0.405512	0.415483	0.455	0.483991	0.347233	0.32902	0.464749	0.0656859	0.409332	0.487883	0.314622	0.383587	0.302377	0.328609	0.291803	0.436467	0.512106	0.453795	0.219331	0.451601	0.417871	0.18411	0.444456	0.499346	0.296962	0.191303	0.52479	0.393163	0.44117
C2	0.498637	0.463105	0.306868	0.38113	0.437165	0.373814	0.45039	0.366143	0.311119	0.253985	0.0956213	0.201736	0.431827	0.288899	0.367699	0.353274	0.390595	0.356604	0.333321	0.507789	0.420316	0.414559	0.457938	0.477584	0.355567	0.269393	0.472824	0.0613037	0.389932	0.470276	0.293788	0.337104	0.32273	0.362344	0.315343	0.380377	0.496761	0.458019	0.126672	0.434132	0.380424	0.0783948	0.370569	0.485189	0.259305	0.0665709	0.506917	0.395366	0.447072
C1	0.492369	0.407466	0.337937	0.364649	0.433855	0.372617	0.446706	0.380384	0.37225	0.332194	0.202685	0.280727	0.433312	0.31904	0.40318	0.352862	0.358385	0.375995	0.342965	0.496864	0.404799	0.44143	0.469105	0.479804	0.326249	0.306634	0.454175	0.0100032	0.363127	0.466974	0.285897	0.398418	0.284208	0.315011	0.274849	0.39309	0.506677	0.43276	0.0925639	0.435707	0.371958	0.0500583	0.394229	0.522282	0.324592	0.118312	0.51749	0.386773	0.44223
C2	0.492294	0.442407	0.378871	0.385434	0.476066	0.375178	0.443079	0.38817	0.372718	0.315753	0.241242	0.270547	0.472944	0.376975	0.422251	0.349534	0.379817	0.378028	0.375791	0.489408	0.406802	0.430631	0.461879	0.490417	0.319212	0.356437	0.483872	0.051343	0.340666	0.461125	0.308332	0.370826	0.296845	0.33119	0.292604	0.427101	0.495757	0.46	0.187477	0.476656	0.393604	0.145796	0.43028	0.471536	0.245215	0.164084	0.516749	0.391409	0.449882
C1	0.500071	0.437877	0.354335	0.40514	0.457226	0.355268	0.444501	0.383343	0.337681	0.257739	0.140355	0.223576	0.435692	0.335833	0.377349	0.3842	0.398326	0.388325	0.362062	0.515152	0.413718	0.427494	0.471326	0.504973	0.32992	0.287318	0.506137	0.038496	0.345989	0.480887	0.349223	0.390596	0.329848	0.36119	0.325079	0.395335	0.498167	0.44036	0.0288747	0.458953	0.388692	-0.0424966	0.404368	0.460956	0.228346	0.0544649	0.494351	0.392164	0.454164
C1	0.498259	0.430758	0.394431	0.412097	0.463795	0.403625	0.44279	0.399382	0.380749	0.338489	0.226156	0.28401	0.449648	0.383854	0.44634	0.382327	0.379388	0.403946	0.383744	0.507707	0.401618	0.419491	0.465668	0.490443	0.347482	0.376248	0.477756	0.0445289	0.368852	0.482557	0.302129	0.388702	0.335155	0.368515	0.332714	0.415617	0.503771	0.445209	0.0966543	0.470256	0.390295	0.0619912	0.44646	0.465957	0.267627	0.110951	0.52723	0.403206	0.453467
C2	0.508756	0.435494	0.345254	0.391389	0.43447	0.353072	0.447683	0.374114	0.349545	0.251868	0.161782	0.247908	0.426449	0.298989	0.389954	0.377218	0.391276	0.372314	0.376803	0.519326	0.421858	0.444205	0.46113	0.497376	0.298408	0.242347	0.469173	0.0516741	0.296322	0.476188	0.302551	0.448948	0.288097	0.311607	0.286007	0.382682	0.488346	0.415983	0.0169629	0.452138	0.400625	-0.0381832	0.413001	0.422554	0.237447	0.000985916	0.492845	0.390855	0.456458
C2	0.480826	0.439268	0.340024	0.403435	0.482143	0.341194	0.44108	0.370965	0.325707	0.276918	0.150858	0.208182	0.438053	0.298915	0.406764	0.371325	0.391979	0.389538	0.341037	0.502521	0.411414	0.440897	0.45671	0.495548	0.31464	0.238429	0.495673	0.036027	0.30931	0.477404	0.288696	0.318307	0.293071	0.337146	0.296614	0.392587	0.49996	0.433044	0.0690058	0.446119	0.384924	0.0213395	0.365795	0.456919	0.22498	0.086288	0.492698	0.372675	0.446823
C1	0.49902	0.443852	0.385555	0.404317	0.459159	0.395413	0.435571	0.40216	0.377692	0.340078	0.249244	0.298492	0.463797	0.376593	0.443683	0.373744	0.393892	0.387164	0.381273	0.505441	0.420132	0.415505	0.467457	0.492242	0.319945	0.317705	0.481094	0.0726898	0.397697	0.475618	0.299585	0.381827	0.315424	0.346021	0.30955	0.415251	0.524829	0.460793	0.168134	0.481142	0.404517	0.147432	0.430662	0.480974	0.289013	0.168031	0.514632	0.400427	0.447983
C2	0.484356	0.405995	0.338146	0.396977	0.44066	0.342213	0.434464	0.391508	0.388536	0.307995	0.220227	0.301561	0.433921	0.321951	0.413732	0.381408	0.389881	0.380486	0.386769	0.492576	0.42586	0.419716	0.474304	0.499466	0.346214	0.32728	0.467957	-0.000574287	0.316213	0.488402	0.320827	0.410861	0.331193	0.375546	0.329796	0.38554	0.482198	0.408572	0.0792736	0.433778	0.378311	0.0346911	0.386836	0.433877	0.273943	0.0976826	0.510247	0.3969	0.449881
C2	0.491833	0.426557	0.314353	0.401449	0.434618	0.357302	0.429098	0.387481	0.3645	0.280771	0.175592	0.272023	0.442891	0.309866	0.380167	0.371561	0.377464	0.358611	0.358816	0.508671	0.412702	0.421002	0.465233	0.493642	0.32597	0.271741	0.482446	0.017443	0.339381	0.477457	0.33759	0.428882	0.299702	0.336815	0.301047	0.39999	0.492759	0.439442	0.0204326	0.463142	0.395724	-0.0445153	0.397495	0.453429	0.238971	0.0387504	0.511092	0.390702	0.450498
C1	0.498358	0.430868	0.379868	0.407683	0.472592	0.388339	0.439539	0.37206	0.32602	0.262463	0.0699969	0.198863	0.452465	0.339545	0.406788	0.369062	0.385383	0.366395	0.347896	0.510849	0.416342	0.440924	0.443494	0.498698	0.33097	0.337787	0.466966	-0.0164437	0.34905	0.50066	0.286651	0.383784	0.321165	0.358604	0.317642	0.386156	0.512201	0.453553	0.0605988	0.458851	0.404715	0.00424061	0.380396	0.488039	0.246167	0.0191383	0.498364	0.403051	0.441551
C2	0.496473	0.425956	0.365072	0.385653	0.429816	0.354004	0.445774	0.384874	0.347448	0.31641	0.184283	0.244013	0.43186	0.319304	0.404868	0.340994	0.378863	0.38096	0.344429	0.503686	0.421629	0.449046	0.459929	0.48806	0.320741	0.325315	0.457045	0.0138949	0.332507	0.46703	0.299597	0.312998	0.295424	0.324427	0.288408	0.407584	0.513089	0.441559	0.144502	0.450037	0.39152	0.0899353	0.403076	0.471742	0.28031	0.131674	0.51272	0.386849	0.447474
C1	0.488808	0.421327	0.360103	0.414591	0.477705	0.379451	0.422331	0.38208	0.329792	0.258331	0.134151	0.213333	0.417521	0.330198	0.422356	0.40908	0.374165	0.399434	0.366965	0.494491	0.40316	0.405635	0.46462	0.495532	0.358842	0.394396	0.500463	0.0499626	0.368112	0.48471	0.32396	0.362285	0.360338	0.391464	0.36607	0.404697	0.504116	0.452611	0.0638179	0.453263	0.379035	0.0040039	0.422287	0.420652	0.254382	0.0747663	0.502556	0.397472	0.445527
C2	0.495949	0.449315	0.263425	0.373424	0.448256	0.30971	0.435159	0.324889	0.24676	0.200446	0.0362823	0.134068	0.397236	0.219741	0.368668	0.387398	0.350384	0.359979	0.35941	0.512568	0.419069	0.459027	0.485314	0.477563	0.298868	0.28673	0.428066	0.148317	0.285178	0.447639	0.351932	0.426364	0.253413	0.288258	0.256638	0.349168	0.48397	0.431842	-0.0207443	0.420422	0.40453	-0.0719185	0.358398	0.45632	0.165739	-0.000494606	0.514691	0.377353	0.458157
C2	0.491302	0.434983	0.324522	0.37575	0.466045	0.383551	0.457674	0.386738	0.34642	0.306627	0.214929	0.240271	0.448245	0.373966	0.42786	0.337009	0.363032	0.393201	0.348713	0.509807	0.419365	0.424248	0.463725	0.475969	0.313175	0.298972	0.472673	0.0339852	0.364494	0.473985	0.280602	0.341582	0.279365	0.315745	0.270591	0.419026	0.518936	0.438265	0.136735	0.455838	0.383405	0.118654	0.431563	0.47842	0.290179	0.123538	0.509868	0.391511	0.453624
C1	0.487556	0.437178	0.349566	0.396055	0.397502	0.366396	0.444431	0.384947	0.356634	0.275092	0.19982	0.239196	0.432587	0.313925	0.379635	0.351392	0.409528	0.371561	0.364973	0.521222	0.431448	0.438699	0.479296	0.494064	0.32715	0.305154	0.501599	0.0566894	0.330585	0.476244	0.295279	0.365044	0.314072	0.344885	0.305276	0.408609	0.51257	0.440312	0.127603	0.467545	0.381541	0.0953161	0.419672	0.425273	0.251583	0.131611	0.513046	0.398668	0.455771
C2	0.493001	0.45763	0.363224	0.376212	0.458427	0.364498	0.440862	0.376709	0.311742	0.275686	0.130492	0.177326	0.451605	0.390559	0.424075	0.385436	0.376811	0.373958	0.336124	0.499891	0.411968	0.449026	0.468267	0.496792	0.330302	0.285356	0.446067	-0.00584023	0.338232	0.481191	0.285862	0.290036	0.300666	0.3343	0.293626	0.390024	0.486064	0.449752	0.033531	0.435213	0.374909	-0.0173278	0.405703	0.457385	0.21467	0.0659813	0.519621	0.386557	0.450213
C2	0.492263	0.407211	0.296533	0.366561	0.438685	0.374756	0.446809	0.375173	0.331341	0.26477	0.161487	0.243254	0.446847	0.32705	0.374405	0.330419	0.395905	0.377916	0.347711	0.52123	0.410099	0.440073	0.468898	0.473164	0.307235	0.221923	0.46244	-0.00229718	0.311866	0.467172	0.278539	0.30698	0.264891	0.309335	0.258031	0.371531	0.491379	0.442345	0.0908474	0.446499	0.36983	0.0582532	0.370996	0.479232	0.256107	0.0939294	0.511837	0.382468	0.459532
C2	0.495506	0.458118	0.358318	0.40319	0.427081	0.370132	0.451199	0.368356	0.317039	0.264871	0.158706	0.196579	0.452274	0.3422	0.394196	0.380261	0.38558	0.379427	0.346087	0.506719	0.424921	0.435059	0.465723	0.503491	0.340653	0.301805	0.484063	0.0353945	0.327255	0.479236	0.261985	0.325284	0.3256	0.365735	0.326901	0.400106	0.505246	0.438633	0.12994	0.443172	0.392023	0.0675914	0.427968	0.454591	0.251436	0.108721	0.515427	0.39462	0.457284
C2	0.485778	0.435182	0.370571	0.409605	0.42552	0.370698	0.437572	0.400852	0.377854	0.318941	0.239059	0.297043	0.451799	0.340239	0.397317	0.366275	0.407914	0.387695	0.375913	0.50947	0.408623	0.424283	0.463753	0.491054	0.33705	0.367132	0.461172	0.054848	0.352833	0.476773	0.27384	0.359496	0.326527	0.362882	0.327627	0.420964	0.506351	0.476514	0.183882	0.472597	0.396966	0.159416	0.45094	0.46253	0.287434	0.182221	0.513161	0.406913	0.460549
C2	0.493268	0.41859	0.314212	0.36884	0.45743	0.346482	0.439568	0.368897	0.329793	0.262029	0.170043	0.21474	0.427695	0.342389	0.438126	0.361812	0.392942	0.33178	0.354641	0.518494	0.414013	0.423264	0.463361	0.490565	0.320277	0.292541	0.462342	0.026972	0.321053	0.460657	0.333813	0.413727	0.271644	0.30039	0.274188	0.401165	0.487432	0.434881	0.14955	0.453918	0.391412	0.104222	0.409664	0.441975	0.209546	0.0960288	0.524107	0.381573	0.453536
C1	0.466607	0.431678	0.27044	0.383044	0.453409	0.307051	0.443761	0.362473	0.311189	0.227425	0.0923893	0.183662	0.418957	0.319774	0.36598	0.348591	0.363481	0.337898	0.291736	0.505852	0.431985	0.421123	0.456702	0.487234	0.327908	0.218857	0.471957	-0.0125568	0.30013	0.483995	0.279809	0.277629	0.291719	0.322693	0.277907	0.340511	0.470176	0.415285	0.0020975	0.409448	0.364225	-0.0698273	0.345316	0.454603	0.185237	0.00797842	0.515911	0.372395	0.447802
C2	0.470087	0.454189	0.313053	0.382731	0.418962	0.334176	0.438807	0.381154	0.34469	0.298606	0.196839	0.249446	0.413735	0.336857	0.372616	0.366303	0.357244	0.370689	0.362849	0.496737	0.40088	0.433906	0.467729	0.484271	0.312316	0.279047	0.449261	0.0189773	0.289425	0.468612	0.286913	0.286625	0.283772	0.317511	0.27414	0.392635	0.472008	0.446383	0.223281	0.450598	0.371334	0.207974	0.392341	0.436092	0.30707	0.169427	0.513095	0.369242	0.450404
C1	0.492315	0.444375	0.336584	0.418039	0.455116	0.386054	0.446404	0.389301	0.344139	0.313697	0.218668	0.235917	0.456687	0.375548	0.41893	0.383726	0.393235	0.369849	0.348897	0.485156	0.414967	0.414818	0.475024	0.497167	0.334101	0.280611	0.505888	0.0314813	0.324854	0.475429	0.291729	0.332599	0.322465	0.354027	0.322353	0.39852	0.48223	0.470339	0.213095	0.457379	0.378393	0.197396	0.402316	0.446193	0.276299	0.181062	0.512436	0.385948	0.441078
C2	0.502526	0.422744	0.411747	0.398129	0.446007	0.374197	0.448641	0.394057	0.370643	0.298103	0.204049	0.260974	0.43805	0.348693	0.384107	0.359016	0.392587	0.39106	0.360765	0.51332	0.428162	0.436118	0.48861	0.489686	0.336399	0.299924	0.486427	0.0818695	0.332662	0.480876	0.253843	0.381695	0.322554	0.351188	0.32179	0.421613	0.529737	0.446726	0.146764	0.470299	0.405093	0.109064	0.417754	0.47572	0.299871	0.133793	0.503917	0.405789	0.448007
C2	0.48447	0.446071	0.355282	0.390789	0.442187	0.360335	0.440571	0.377384	0.332082	0.284232	0.186483	0.209571	0.453436	0.358069	0.418041	0.332195	0.354098	0.384083	0.365978	0.496692	0.40121	0.440345	0.463538	0.496854	0.322931	0.254408	0.483786	0.0738474	0.30993	0.470456	0.274248	0.40714	0.312917	0.331211	0.306191	0.423599	0.473888	0.425394	0.13904	0.457195	0.385773	0.116108	0.443515	0.441124	0.235895	0.135133	0.509697	0.387131	0.455714
C2	0.495726	0.431753	0.334939	0.380038	0.435976	0.385746	0.443425	0.382491	0.338375	0.293653	0.174637	0.227799	0.447412	0.332853	0.404911	0.345154	0.374988	0.383089	0.344391	0.519374	0.415895	0.441165	0.456585	0.481588	0.323991	0.290086	0.464763	0.0467482	0.385689	0.479919	0.267343	0.408184	0.304192	0.330145	0.29524	0.406668	0.516484	0.448589	0.153423	0.464808	0.422067	0.122005	0.391337	0.499349	0.291774	0.1292	0.50414	0.394313	0.452248
C1	0.499616	0.466646	0.384955	0.396919	0.485988	0.375579	0.434465	0.404563	0.373165	0.309083	0.234073	0.278163	0.461621	0.365538	0.409895	0.354144	0.381412	0.387839	0.349395	0.508295	0.414514	0.452623	0.473504	0.489877	0.316707	0.270816	0.520527	0.0421921	0.339549	0.474455	0.283274	0.301276	0.295237	0.331639	0.291552	0.414687	0.516994	0.461392	0.183001	0.484593	0.392397	0.163	0.413814	0.467979	0.246338	0.144684	0.504157	0.391868	0.447578
C2	0.489148	0.426943	0.335513	0.366968	0.40671	0.356061	0.450924	0.39324	0.352136	0.289154	0.223287	0.258554	0.444246	0.329414	0.358011	0.315155	0.377959	0.350332	0.337797	0.505979	0.4157	0.429754	0.459944	0.489287	0.320182	0.242755	0.471209	0.0438807	0.35499	0.474394	0.312425	0.349431	0.276742	0.318925	0.276787	0.399775	0.500496	0.457618	0.182248	0.452093	0.377648	0.147458	0.400534	0.455668	0.213368	0.137985	0.527172	0.382048	0.453431
C2	0.477495	0.419543	0.261045	0.36011	0.40189	0.31216	0.456719	0.360824	0.32444	0.224611	0.114954	0.203233	0.419072	0.322519	0.348975	0.335611	0.392842	0.359865	0.341938	0.504235	0.423807	0.433131	0.474044	0.466831	0.352861	0.264221	0.478509	0.0855206	0.352168	0.460055	0.260755	0.312272	0.326409	0.374368	0.323587	0.350675	0.49453	0.412342	-0.0663098	0.418662	0.352236	-0.117568	0.382711	0.422719	0.248023	0.0172245	0.507559	0.39684	0.453295
C1	0.47922	0.413534	0.305489	0.390887	0.388254	0.360097	0.440014	0.378687	0.321486	0.232817	0.118399	0.19215	0.417977	0.302551	0.383672	0.361142	0.364671	0.363779	0.342382	0.515621	0.432219	0.44616	0.475612	0.492916	0.335511	0.314999	0.475635	0.0477047	0.34003	0.470357	0.241778	0.382371	0.340983	0.375111	0.337417	0.38512	0.493334	0.468669	0.00394532	0.437755	0.380886	-0.05198	0.406473	0.440922	0.222796	0.0243195	0.499778	0.395188	0.451175
C2	0.495221	0.429754	0.364968	0.415343	0.451045	0.352027	0.453437	0.38309	0.345961	0.278157	0.175363	0.232172	0.451515	0.331924	0.366025	0.362159	0.368939	0.368024	0.377553	0.517106	0.426512	0.431386	0.467675	0.498097	0.334159	0.290765	0.470824	0.0239233	0.364219	0.469745	0.3	0.379132	0.321663	0.349279	0.318476	0.40613	0.498816	0.450808	0.13309	0.480764	0.396413	0.115031	0.418444	0.456079	0.268782	0.111493	0.505446	0.398629	0.454326
C1	0.499541	0.438044	0.371128	0.410098	0.450984	0.378431	0.42935	0.387998	0.352986	0.296871	0.231978	0.243766	0.458914	0.357605	0.426054	0.360635	0.36489	0.350684	0.374525	0.511781	0.391869	0.43182	0.4701	0.495292	0.299954	0.257396	0.518714	0.0564728	0.376937	0.471017	0.324994	0.339644	0.283488	0.320847	0.274227	0.404013	0.520799	0.458048	0.206926	0.488201	0.405829	0.173473	0.411475	0.43568	0.256258	0.136264	0.502333	0.377549	0.434791
C2	0.498672	0.410431	0.374618	0.368224	0.429047	0.359782	0.457212	0.373253	0.346803	0.283593	0.218373	0.229757	0.440302	0.331158	0.39321	0.352878	0.368421	0.355219	0.369287	0.511103	0.408867	0.432195	0.473505	0.489918	0.325607	0.267366	0.45659	0.055131	0.350499	0.461823	0.319559	0.416345	0.29462	0.32532	0.293566	0.415	0.503869	0.43653	0.139471	0.463838	0.376507	0.123411	0.428876	0.427729	0.222426	0.12478	0.523298	0.388642	0.454193
C1	0.501478	0.442586	0.366428	0.398803	0.446355	0.383247	0.454446	0.402014	0.371488	0.324818	0.243698	0.309113	0.446942	0.350813	0.428452	0.353717	0.353404	0.358781	0.34459	0.519735	0.42619	0.431979	0.464834	0.485625	0.337599	0.266721	0.467186	0.0568571	0.358472	0.476732	0.331572	0.32259	0.302505	0.331241	0.302107	0.418846	0.502346	0.499188	0.225564	0.472159	0.389497	0.198061	0.401847	0.493034	0.254197	0.199284	0.513402	0.397661	0.451846
C1	0.488462	0.414686	0.384984	0.394517	0.4591	0.39016	0.424676	0.397578	0.351472	0.308908	0.175476	0.243279	0.426005	0.379992	0.437898	0.409898	0.389544	0.401013	0.348207	0.495532	0.40681	0.429692	0.475025	0.496905	0.374091	0.376298	0.486046	0.0500101	0.396729	0.475076	0.321288	0.398602	0.370299	0.408755	0.3681	0.426177	0.505751	0.463457	0.17744	0.463519	0.379843	0.151218	0.44162	0.415402	0.314085	0.1493	0.524751	0.403879	0.443435
C2	0.483899	0.42058	0.346178	0.386118	0.425016	0.331081	0.438713	0.35835	0.304795	0.221713	0.101596	0.191554	0.400459	0.291545	0.385847	0.374597	0.38377	0.36781	0.3832	0.520281	0.436008	0.456564	0.46993	0.491055	0.317123	0.201674	0.480643	0.0201247	0.298743	0.458523	0.311524	0.390209	0.29238	0.325295	0.293592	0.371223	0.492594	0.432806	-0.0212855	0.46267	0.386973	-0.0796422	0.383828	0.426621	0.191147	-0.0448285	0.500299	0.395617	0.462747
C1	0.504836	0.443852	0.370428	0.394583	0.447635	0.411072	0.45586	0.389464	0.338612	0.335865	0.260022	0.209836	0.455948	0.35731	0.416073	0.350806	0.401042	0.385151	0.394197	0.513643	0.413334	0.413657	0.473355	0.495809	0.325294	0.276682	0.495828	0.0107874	0.413684	0.457846	0.199734	0.308208	0.297764	0.329821	0.290417	0.417175	0.537636	0.417973	0.200596	0.463617	0.410068	0.172182	0.459194	0.514688	0.292772	0.1866	0.515348	0.395358	0.445965
C2	0.458582	0.406547	0.275846	0.347046	0.385389	0.333761	0.406218	0.35087	0.322713	0.269228	0.126893	0.217953	0.383887	0.299456	0.363482	0.341866	0.352384	0.341517	0.323281	0.495837	0.419396	0.423094	0.465269	0.468015	0.317185	0.212819	0.448032	-0.0075341	0.289118	0.460887	0.280502	0.390721	0.273758	0.316515	0.262451	0.359053	0.469086	0.411221	0.0387231	0.393515	0.348597	-0.0139631	0.352782	0.464095	0.225908	0.0288966	0.511961	0.362106	0.427478
C2	0.492745	0.427162	0.349779	0.391031	0.421782	0.335028	0.461544	0.372752	0.340109	0.273803	0.190407	0.235473	0.4403	0.348506	0.415651	0.386235	0.401099	0.361093	0.35731	0.50129	0.398717	0.41856	0.480781	0.491037	0.316066	0.235212	0.464879	-0.0506083	0.344954	0.458172	0.326785	0.412036	0.285329	0.334357	0.290347	0.390508	0.468652	0.449596	0.0676142	0.458697	0.389371	-0.00481946	0.402988	0.446604	0.25842	0.0709949	0.514204	0.380933	0.451827
C1	0.510059	0.442783	0.338799	0.382443	0.465692	0.36753	0.444061	0.401111	0.374384	0.270177	0.154261	0.299063	0.430743	0.329025	0.384128	0.394715	0.373303	0.350874	0.361755	0.513208	0.420561	0.449904	0.456698	0.495273	0.342778	0.30644	0.477108	0.0646985	0.366058	0.484521	0.305509	0.396125	0.324296	0.343229	0.3286	0.382451	0.494328	0.43147	0.0136381	0.439334	0.377001	-0.0472348	0.394143	0.500546	0.242991	0.0292724	0.496346	0.404277	0.455024
C2	0.50368	0.445432	0.359067	0.421176	0.452362	0.386488	0.447963	0.408423	0.37653	0.316808	0.212072	0.289942	0.450471	0.3732	0.461877	0.40108	0.37768	0.375598	0.360932	0.504393	0.401829	0.407113	0.472166	0.508854	0.347134	0.311181	0.473949	0.0520436	0.387037	0.480449	0.329657	0.384887	0.308561	0.339011	0.308202	0.403325	0.498367	0.457804	0.151569	0.460458	0.36637	0.111536	0.435485	0.484341	0.298571	0.139337	0.513163	0.398949	0.45118
C2	0.494667	0.440611	0.358025	0.38874	0.468307	0.356829	0.444378	0.404849	0.375195	0.30938	0.229462	0.277385	0.444594	0.3607	0.388607	0.356879	0.381741	0.345874	0.358782	0.505621	0.404387	0.425243	0.470825	0.509252	0.333011	0.302797	0.496834	0.0474121	0.343632	0.482537	0.292489	0.355968	0.324556	0.35905	0.323577	0.413734	0.490987	0.449104	0.135294	0.484548	0.384283	0.109973	0.415979	0.448678	0.284773	0.138197	0.503547	0.389938	0.444513
C1	0.497177	0.421459	0.362946	0.400604	0.4828	0.359248	0.450622	0.377974	0.311872	0.248645	0.130834	0.179866	0.442132	0.367627	0.427151	0.410568	0.377619	0.3893	0.348251	0.507898	0.41498	0.431859	0.465854	0.495159	0.352041	0.278557	0.484332	-0.0314998	0.36782	0.470896	0.245752	0.307188	0.350092	0.391222	0.34267	0.390766	0.489957	0.43386	-0.00405176	0.460963	0.37232	-0.0862411	0.398537	0.442552	0.256859	0.0407041	0.51717	0.405024	0.459563
C2	0.482727	0.435751	0.315552	0.404064	0.430192	0.345604	0.432661	0.364938	0.351254	0.293015	0.176188	0.245139	0.446681	0.329345	0.40218	0.370402	0.403384	0.36132	0.351903	0.516839	0.420598	0.432617	0.461279	0.493409	0.313933	0.249389	0.489246	0.0252422	0.324273	0.475197	0.275024	0.439466	0.28459	0.33008	0.287152	0.388947	0.484665	0.441049	0.150458	0.432107	0.375198	0.121024	0.396381	0.433839	0.22292	0.10427	0.512907	0.376649	0.443167
C2	0.490215	0.46529	0.357155	0.395994	0.462434	0.386987	0.449675	0.395292	0.34573	0.318794	0.22557	0.255792	0.452161	0.369711	0.428978	0.350273	0.382565	0.347858	0.351097	0.512462	0.426643	0.448095	0.461125	0.495728	0.346236	0.316225	0.47961	0.0275262	0.366324	0.472045	0.279554	0.307954	0.300407	0.322197	0.290165	0.405376	0.511745	0.4599	0.173508	0.459182	0.38638	0.154737	0.40649	0.479208	0.255238	0.161705	0.526606	0.391899	0.450035
C1	0.474403	0.425461	0.370898	0.391593	0.468054	0.353223	0.428708	0.378443	0.328973	0.309099	0.186667	0.197993	0.432767	0.347714	0.427466	0.338769	0.367212	0.336607	0.344223	0.486878	0.400491	0.413461	0.470068	0.492841	0.332758	0.26595	0.501642	0.0213652	0.311475	0.46884	0.266746	0.342347	0.305564	0.340239	0.311041	0.403864	0.461415	0.431007	0.207475	0.448659	0.384814	0.175778	0.429521	0.402573	0.26014	0.123752	0.509013	0.375706	0.430822
C1	0.496218	0.448156	0.390323	0.436382	0.478844	0.392316	0.437618	0.401497	0.374924	0.316434	0.212337	0.26743	0.461348	0.386404	0.454235	0.37388	0.377907	0.403721	0.360672	0.49701	0.391227	0.42625	0.464866	0.510407	0.334863	0.310906	0.485597	0.0704055	0.3494	0.48508	0.286092	0.36538	0.335794	0.367	0.327878	0.413652	0.490812	0.451427	0.15999	0.466514	0.409499	0.132971	0.43325	0.487356	0.257943	0.133991	0.52249	0.39024	0.447025
C1	0.483845	0.431283	0.352261	0.405902	0.468409	0.352979	0.417557	0.372518	0.351538	0.270296	0.155129	0.229326	0.441274	0.348665	0.420151	0.372192	0.375207	0.369621	0.349618	0.493832	0.41287	0.416931	0.470871	0.497728	0.307465	0.273881	0.482104	-0.00788806	0.27024	0.468952	0.292249	0.435202	0.303908	0.34986	0.301393	0.373557	0.470598	0.420607	0.0429087	0.43172	0.374116	-0.00466229	0.375753	0.434972	0.236843	0.0466816	0.502923	0.382186	0.439035
C2	0.495056	0.442283	0.3108	0.404992	0.431932	0.3578	0.441013	0.379545	0.347267	0.286212	0.156614	0.229007	0.444715	0.349715	0.407613	0.39292	0.363848	0.361189	0.377973	0.504116	0.409093	0.425244	0.474664	0.502354	0.337513	0.280032	0.464714	-0.015335	0.314004	0.487453	0.322072	0.444411	0.307709	0.335066	0.306663	0.382087	0.486933	0.47174	0.0609951	0.453366	0.393875	0.0258855	0.407535	0.452995	0.264057	0.0880026	0.513362	0.39367	0.456223
C1	0.486595	0.431006	0.373269	0.423914	0.424592	0.425573	0.445934	0.393073	0.377629	0.307783	0.200033	0.270743	0.437316	0.350787	0.42424	0.38931	0.39995	0.411441	0.390159	0.510551	0.429471	0.42743	0.480076	0.504706	0.340233	0.338224	0.479984	0.0103395	0.364887	0.48668	0.266867	0.361547	0.342796	0.363547	0.331805	0.405451	0.496066	0.455365	0.0795266	0.453199	0.393366	0.0292262	0.423583	0.489498	0.261474	0.0903493	0.51533	0.406845	0.461432
C1	0.489355	0.450425	0.40044	0.40108	0.454733	0.384229	0.442674	0.394308	0.374407	0.324219	0.266748	0.276612	0.454795	0.367133	0.393239	0.333811	0.383208	0.375532	0.359802	0.509265	0.396343	0.428138	0.466292	0.490325	0.322216	0.338824	0.492795	0.0742778	0.343688	0.464621	0.272868	0.305273	0.296584	0.326963	0.295277	0.436639	0.506488	0.46747	0.178796	0.488571	0.402211	0.149452	0.4564	0.455766	0.25987	0.161791	0.520623	0.404269	0.454258
C1	0.500733	0.441595	0.379295	0.398283	0.44627	0.392496	0.448363	0.40574	0.375265	0.323718	0.25108	0.284671	0.452272	0.364431	0.422845	0.346756	0.379517	0.376416	0.355538	0.510333	0.4054	0.42665	0.465685	0.493479	0.310968	0.295269	0.491102	0.0834715	0.369036	0.475856	0.295063	0.365904	0.283576	0.320836	0.28361	0.440179	0.527283	0.467213	0.234485	0.494723	0.402296	0.195044	0.453476	0.488902	0.26101	0.196672	0.525753	0.384001	0.451575
C2	0.48029	0.419665	0.311851	0.357232	0.40397	0.357305	0.418093	0.385744	0.357543	0.273326	0.154735	0.249029	0.417995	0.330686	0.358937	0.328949	0.366538	0.351909	0.318746	0.508166	0.413822	0.448902	0.468056	0.474927	0.339934	0.255203	0.468011	0.0825453	0.357232	0.468912	0.245136	0.274037	0.312124	0.345942	0.311706	0.393498	0.477525	0.42531	0.0569809	0.440016	0.359246	0.0199214	0.410853	0.42368	0.245719	0.0545933	0.508175	0.393004	0.4446
C2	0.497407	0.439826	0.331788	0.391649	0.440686	0.370731	0.441569	0.381806	0.326848	0.282749	0.16874	0.215133	0.444357	0.361254	0.39949	0.383729	0.401703	0.377551	0.339636	0.504419	0.421149	0.430953	0.47716	0.487016	0.347804	0.346879	0.485055	0.0468743	0.325687	0.464744	0.295117	0.289465	0.326737	0.363508	0.318214	0.4017	0.503242	0.428884	0.129688	0.444675	0.375703	0.0970419	0.398159	0.49084	0.308097	0.152959	0.516231	0.38811	0.449926
C2	0.480065	0.416092	0.377644	0.372891	0.467321	0.373638	0.427687	0.389704	0.356256	0.307937	0.173949	0.243091	0.43094	0.350136	0.411864	0.371261	0.377207	0.405931	0.369878	0.500976	0.412346	0.413743	0.466663	0.476773	0.328351	0.285608	0.483487	0.0516038	0.38004	0.476821	0.252219	0.38665	0.306148	0.354728	0.309052	0.396267	0.506557	0.435545	0.106161	0.455369	0.37443	0.0822543	0.433407	0.41589	0.293288	0.130759	0.519885	0.398571	0.439338
C2	0.496363	0.454421	0.362902	0.401529	0.453048	0.379225	0.455692	0.39047	0.322715	0.294418	0.143985	0.194713	0.448931	0.320892	0.391376	0.381969	0.380527	0.402482	0.359575	0.500569	0.417191	0.41841	0.473388	0.509364	0.362006	0.325667	0.489898	-0.00532804	0.364103	0.475253	0.343418	0.340967	0.335361	0.368016	0.335251	0.418186	0.493443	0.444263	0.233797	0.444841	0.390361	0.210375	0.44261	0.461406	0.297469	0.205325	0.514596	0.397236	0.452205
C1	0.503801	0.443596	0.362954	0.391171	0.434017	0.392412	0.457225	0.383427	0.319784	0.269634	0.187531	0.187365	0.443926	0.352053	0.401513	0.340172	0.369294	0.355082	0.332742	0.500169	0.411744	0.42583	0.458867	0.492988	0.329578	0.237644	0.512792	0.0621158	0.301354	0.472159	0.325071	0.294899	0.29784	0.331232	0.294942	0.397683	0.493821	0.454972	0.223164	0.469851	0.400738	0.193135	0.404569	0.481647	0.214719	0.17516	0.511716	0.374133	0.436175
C1	0.502616	0.440397	0.385541	0.396358	0.458245	0.384247	0.465176	0.394043	0.35883	0.301527	0.224038	0.253415	0.45248	0.368217	0.390804	0.364833	0.389586	0.393634	0.364876	0.518961	0.423489	0.438808	0.461905	0.491895	0.326609	0.311362	0.481422	0.0774786	0.3637	0.463673	0.275888	0.356435	0.306961	0.347357	0.300598	0.410541	0.512779	0.458011	0.135515	0.493019	0.393186	0.102574	0.411111	0.41446	0.29175	0.118356	0.511701	0.397086	0.451082
C1	0.463326	0.413251	0.343449	0.386449	0.436061	0.348317	0.420838	0.366636	0.339991	0.291083	0.158235	0.219299	0.424244	0.349378	0.41684	0.319458	0.367284	0.354633	0.355022	0.474803	0.386119	0.396602	0.449231	0.477284	0.31371	0.249096	0.486566	0.00751728	0.281794	0.453289	0.255527	0.359262	0.290625	0.323977	0.285604	0.407852	0.486705	0.457847	0.139095	0.435486	0.377173	0.0925982	0.401695	0.465589	0.190444	0.121511	0.521975	0.375722	0.439618
C2	0.501917	0.449049	0.396417	0.414568	0.481821	0.370996	0.43875	0.385198	0.344226	0.305351	0.16907	0.206223	0.447796	0.366816	0.446763	0.405851	0.382036	0.401694	0.384315	0.495445	0.408175	0.412	0.482663	0.510435	0.328848	0.339722	0.486262	0.063191	0.347096	0.489692	0.237905	0.356509	0.326582	0.358032	0.32078	0.422091	0.476665	0.453763	0.140109	0.471432	0.400788	0.112489	0.44524	0.399484	0.312821	0.135145	0.502021	0.398127	0.438331
C1	0.498147	0.44704	0.344456	0.397801	0.431591	0.362678	0.429291	0.385538	0.359019	0.320715	0.203474	0.261704	0.459939	0.344767	0.39414	0.377379	0.372274	0.378487	0.386301	0.510571	0.413523	0.426536	0.465548	0.502239	0.3331	0.352421	0.480383	0.00261613	0.373445	0.47569	0.285202	0.435661	0.310265	0.342453	0.308084	0.416356	0.512666	0.47397	0.0687182	0.476038	0.395346	0.0295965	0.423579	0.436244	0.25705	0.0973919	0.517623	0.401522	0.459781
C2	0.499277	0.438425	0.272821	0.348195	0.452351	0.358841	0.464397	0.367721	0.323854	0.245567	0.107436	0.203455	0.440212	0.354123	0.411465	0.328137	0.376428	0.352024	0.297583	0.503482	0.411285	0.427362	0.451181	0.476657	0.303244	0.280659	0.472154	0.0644986	0.316429	0.45542	0.259693	0.342282	0.264171	0.305818	0.258452	0.380401	0.50192	0.432663	0.0721028	0.41436	0.338253	0.0406725	0.408676	0.424337	0.2601	0.0686797	0.512828	0.36923	0.453146
C2	0.509169	0.434337	0.404561	0.390115	0.462529	0.382978	0.438569	0.399875	0.370294	0.315899	0.240307	0.264707	0.457857	0.397921	0.448552	0.383473	0.372411	0.378887	0.351422	0.516792	0.40612	0.434281	0.473528	0.494425	0.334632	0.290902	0.474394	0.0781732	0.372033	0.484609	0.328676	0.421707	0.313358	0.352411	0.312851	0.419539	0.504235	0.462507	0.15347	0.479892	0.405014	0.114768	0.443099	0.457109	0.211048	0.143988	0.520504	0.399301	0.455308
C2	0.506015	0.440653	0.356253	0.410238	0.486998	0.40396	0.453844	0.397543	0.362557	0.314951	0.222751	0.277215	0.462439	0.377348	0.429983	0.376698	0.364609	0.390882	0.379684	0.512307	0.402372	0.419903	0.4596	0.499303	0.329754	0.304593	0.482552	0.0233716	0.376094	0.476	0.288694	0.347506	0.301128	0.333694	0.299322	0.43676	0.51608	0.459891	0.211342	0.473588	0.41716	0.174845	0.441146	0.491395	0.292026	0.162107	0.514351	0.402522	0.457646
C1	0.471784	0.402961	0.313369	0.408408	0.415102	0.352454	0.427695	0.381393	0.338487	0.269157	0.135572	0.237413	0.395873	0.301898	0.393981	0.393372	0.376899	0.394316	0.345947	0.474403	0.407094	0.405906	0.475974	0.48816	0.355337	0.303533	0.503071	0.0461256	0.322207	0.470167	0.289387	0.38233	0.350416	0.396511	0.347385	0.367236	0.479233	0.411656	0.0177319	0.391965	0.357722	-0.0334936	0.390186	0.39907	0.247836	0.052501	0.515406	0.385387	0.422404
C2	0.487212	0.431187	0.297533	0.37051	0.451059	0.367049	0.450299	0.3632	0.301782	0.223557	0.12418	0.168854	0.430514	0.319863	0.385156	0.306476	0.386204	0.306871	0.320656	0.526461	0.424353	0.445206	0.44596	0.482148	0.281039	0.229577	0.478221	-0.00911004	0.276384	0.458515	0.280427	0.342021	0.242126	0.308014	0.240185	0.402904	0.505238	0.450094	0.154566	0.464231	0.380399	0.107344	0.393586	0.458585	0.228034	0.0782021	0.50527	0.367766	0.45157
C2	0.502776	0.416811	0.272911	0.348847	0.455098	0.337531	0.45561	0.353355	0.264487	0.1952	0.0283225	0.110027	0.429431	0.371623	0.435738	0.340175	0.417493	0.369307	0.318949	0.515656	0.428895	0.440896	0.469467	0.475423	0.323827	0.180766	0.476126	-0.0162432	0.322803	0.48205	0.280659	0.255478	0.278307	0.332898	0.272764	0.361564	0.505835	0.416358	0.0216815	0.418786	0.35343	-0.0277097	0.36763	0.478596	0.200959	0.0387486	0.511658	0.381771	0.463707
C2	0.501419	0.441946	0.385854	0.399515	0.463995	0.395497	0.445931	0.40175	0.367653	0.329629	0.251156	0.283345	0.457267	0.351403	0.411133	0.35547	0.391016	0.407459	0.382167	0.510986	0.41088	0.425079	0.457626	0.490855	0.323969	0.294437	0.486201	0.0214888	0.410773	0.46576	0.312325	0.353806	0.301528	0.339605	0.297758	0.434194	0.526416	0.468707	0.220825	0.493638	0.410433	0.19735	0.436891	0.513729	0.285699	0.192338	0.506907	0.398857	0.45262
C1	0.491192	0.451487	0.417249	0.422529	0.485629	0.373316	0.431455	0.371291	0.30231	0.264663	0.10868	0.174606	0.43499	0.368923	0.445205	0.400688	0.388892	0.375895	0.36382	0.487234	0.406405	0.405549	0.471943	0.49494	0.313186	0.285003	0.510366	0.0944894	0.303316	0.466546	0.22091	0.309382	0.333114	0.371241	0.331223	0.370325	0.471971	0.416672	0.104142	0.458639	0.388246	0.0669587	0.384603	0.414464	0.242247	0.0894843	0.493641	0.389313	0.431213
C1	0.490122	0.412483	0.320214	0.364706	0.391822	0.344015	0.442076	0.374861	0.342552	0.305545	0.212611	0.230265	0.418191	0.347716	0.383342	0.34876	0.367991	0.36007	0.346322	0.504602	0.432476	0.437537	0.465371	0.474884	0.329367	0.279232	0.475155	-0.000801916	0.321194	0.456426	0.298661	0.277978	0.302472	0.337308	0.293866	0.389409	0.487826	0.433693	0.120995	0.430532	0.360799	0.0771189	0.40643	0.477465	0.308802	0.133066	0.510671	0.389079	0.451458
C2	0.484909	0.45033	0.300057	0.356898	0.424843	0.358708	0.448127	0.375633	0.308409	0.261594	0.145225	0.184411	0.422297	0.329863	0.381098	0.315404	0.393942	0.35465	0.344636	0.520235	0.422934	0.439002	0.46596	0.471209	0.303492	0.234068	0.485553	0.0257069	0.354236	0.451917	0.277656	0.305001	0.24894	0.282129	0.240707	0.396005	0.498468	0.436938	0.182637	0.449664	0.39233	0.157849	0.410824	0.445265	0.215143	0.120899	0.513262	0.38542	0.460254
C1	0.491654	0.447308	0.351041	0.400969	0.426595	0.365309	0.434691	0.392045	0.360233	0.30634	0.193523	0.245458	0.446124	0.32381	0.377267	0.396905	0.377653	0.416627	0.385723	0.508919	0.419002	0.417964	0.477155	0.505031	0.347171	0.349347	0.478517	0.0230876	0.350449	0.48186	0.294976	0.393074	0.353862	0.378258	0.351271	0.409481	0.506623	0.446714	0.062961	0.45776	0.409357	0.0212595	0.428044	0.441892	0.265551	0.0733295	0.50754	0.410562	0.463168
C1	0.49039	0.452498	0.341113	0.414864	0.437086	0.356228	0.440057	0.378888	0.351788	0.29682	0.216928	0.257861	0.441875	0.323138	0.405404	0.363232	0.360584	0.38044	0.340708	0.49251	0.414557	0.428949	0.468005	0.490403	0.336879	0.345774	0.496451	0.00878257	0.367052	0.465981	0.285907	0.424031	0.32273	0.364453	0.32968	0.390053	0.468636	0.429357	0.146788	0.437038	0.348526	0.121482	0.445961	0.412851	0.302301	0.118359	0.507107	0.384293	0.443114
C1	0.487593	0.412367	0.362782	0.401544	0.433455	0.375858	0.427219	0.38065	0.314616	0.280574	0.146861	0.180734	0.42504	0.351839	0.430148	0.40337	0.37308	0.410736	0.3371	0.475327	0.411808	0.404022	0.476624	0.490899	0.367585	0.317138	0.515602	0.0741933	0.37725	0.480612	0.268628	0.385022	0.374385	0.421424	0.371658	0.404472	0.493027	0.421354	0.0519766	0.424403	0.365839	0.0207377	0.450705	0.391066	0.270032	0.0773097	0.514304	0.403187	0.436891
C1	0.489291	0.411488	0.324796	0.390739	0.419023	0.376494	0.443258	0.380808	0.365576	0.29889	0.231368	0.264731	0.437198	0.339889	0.396491	0.331063	0.365906	0.381572	0.354728	0.501046	0.425677	0.439451	0.473176	0.484402	0.302231	0.32209	0.503856	0.00822711	0.3602	0.471548	0.270692	0.406197	0.289702	0.334732	0.28287	0.422518	0.500115	0.429273	0.120857	0.454245	0.382094	0.0724418	0.435699	0.448003	0.257441	0.128473	0.511791	0.392072	0.455228
C1	0.496307	0.429699	0.320439	0.35702	0.423611	0.344136	0.460644	0.375701	0.330733	0.262602	0.169418	0.218853	0.448706	0.321538	0.390262	0.342813	0.400008	0.361134	0.345308	0.525151	0.422718	0.442103	0.463185	0.485	0.294587	0.262339	0.489099	0.040384	0.323347	0.463145	0.311529	0.404635	0.263118	0.305067	0.264765	0.379497	0.483962	0.436101	0.168194	0.444944	0.369824	0.111136	0.412406	0.43923	0.232931	0.0722648	0.503645	0.385213	0.46205
C1	0.491868	0.43258	0.40562	0.401448	0.467302	0.376722	0.429123	0.389593	0.345407	0.321221	0.18732	0.238241	0.441552	0.383727	0.446712	0.408984	0.382577	0.407179	0.348676	0.479086	0.406943	0.412894	0.469132	0.503634	0.363033	0.362498	0.505406	0.0680599	0.351271	0.480372	0.287433	0.383535	0.374824	0.412607	0.373218	0.400756	0.484094	0.425389	0.150719	0.433247	0.367115	0.113129	0.432897	0.408402	0.287077	0.124357	0.509274	0.400129	0.427462
C1	0.487956	0.427862	0.373907	0.414697	0.451725	0.361934	0.427981	0.386997	0.375307	0.324258	0.202472	0.276214	0.446789	0.375101	0.428675	0.392064	0.367635	0.379671	0.370313	0.511713	0.419609	0.432415	0.470291	0.491288	0.350635	0.321297	0.474317	0.0024242	0.357249	0.464732	0.350458	0.439108	0.325018	0.361684	0.325641	0.397333	0.486675	0.458551	0.225494	0.460249	0.379313	0.201538	0.430071	0.464665	0.260462	0.1754	0.517386	0.392038	0.45986
C1	0.491773	0.467166	0.352288	0.37054	0.463332	0.373056	0.450726	0.400351	0.360207	0.277254	0.208385	0.284705	0.453358	0.357328	0.363935	0.333938	0.380291	0.392671	0.350976	0.525901	0.411088	0.444263	0.463384	0.478403	0.304622	0.251177	0.482151	0.0123163	0.339939	0.473443	0.306203	0.335069	0.265959	0.301997	0.259369	0.387465	0.512162	0.456093	0.0799291	0.482457	0.408281	0.0414115	0.401497	0.490772	0.276216	0.0863418	0.509635	0.385789	0.457324
C2	0.504102	0.434209	0.349619	0.397767	0.459232	0.405971	0.446394	0.397297	0.339871	0.272691	0.196601	0.229036	0.456552	0.374026	0.417612	0.368749	0.364827	0.36555	0.376082	0.513983	0.421618	0.437045	0.475974	0.501692	0.336111	0.255863	0.487595	0.0435561	0.374764	0.460359	0.287105	0.321164	0.299554	0.327625	0.295486	0.390321	0.52476	0.447101	0.238846	0.468943	0.386987	0.221973	0.414095	0.486163	0.254476	0.192402	0.520986	0.390194	0.455754
C2	0.478773	0.423769	0.318606	0.374718	0.402046	0.365115	0.445708	0.378571	0.316818	0.267904	0.167692	0.202891	0.42371	0.361297	0.415193	0.312401	0.374126	0.377003	0.31435	0.488022	0.428193	0.450128	0.459604	0.476919	0.326114	0.242239	0.466974	-0.0457289	0.322616	0.457627	0.281401	0.283864	0.298693	0.335975	0.2949	0.383494	0.481443	0.424801	0.187587	0.437871	0.346542	0.159895	0.393435	0.500361	0.265674	0.153561	0.505399	0.385604	0.45235
C2	0.494135	0.428483	0.372055	0.396736	0.424511	0.361316	0.449597	0.370238	0.341306	0.268969	0.182369	0.224595	0.427903	0.327409	0.411414	0.362175	0.384952	0.38489	0.370184	0.506885	0.425195	0.434131	0.476213	0.498377	0.33152	0.279385	0.483514	0.0564948	0.331365	0.46212	0.261321	0.383743	0.318848	0.352526	0.31774	0.395036	0.506257	0.417444	0.181222	0.440738	0.387677	0.15822	0.424493	0.427154	0.200399	0.122518	0.514634	0.393618	0.449767
C2	0.499784	0.442128	0.335498	0.409896	0.430289	0.385248	0.455424	0.392204	0.33217	0.270322	0.158248	0.212048	0.443048	0.32397	0.408341	0.371185	0.385697	0.392764	0.385295	0.531931	0.43208	0.452211	0.466558	0.491584	0.306472	0.31972	0.465531	0.0447829	0.334408	0.479264	0.292793	0.30223	0.280602	0.314916	0.271278	0.402013	0.529578	0.480593	0.276237	0.487372	0.399649	0.246314	0.4137	0.466608	0.249278	0.185719	0.511474	0.406025	0.472274
C1	0.491808	0.427691	0.372002	0.398284	0.46234	0.362937	0.425635	0.384573	0.348314	0.29966	0.160028	0.232034	0.43495	0.345371	0.411355	0.404425	0.372856	0.395924	0.360598	0.502954	0.408711	0.436149	0.471214	0.504379	0.356052	0.31882	0.488702	0.0382541	0.375244	0.472232	0.318223	0.447164	0.349507	0.3898	0.352226	0.407302	0.494936	0.45459	0.0561414	0.453723	0.38209	0.00202117	0.411173	0.415793	0.286061	0.0667444	0.509704	0.399528	0.448055
C2	0.486859	0.426943	0.352023	0.370232	0.435791	0.360191	0.434505	0.383251	0.355811	0.291609	0.202887	0.256788	0.441319	0.373309	0.444555	0.359596	0.378497	0.362667	0.347796	0.494352	0.411562	0.434779	0.463028	0.478486	0.324967	0.228073	0.464493	0.0148424	0.335116	0.471856	0.306327	0.39394	0.29301	0.31875	0.288089	0.418254	0.481676	0.43758	0.0888894	0.452103	0.371297	0.0459199	0.426995	0.449369	0.21958	0.0730934	0.51948	0.385645	0.449446
C1	0.464687	0.408793	0.341854	0.39698	0.398415	0.354747	0.439335	0.386937	0.352266	0.332757	0.241507	0.272399	0.432551	0.357569	0.377282	0.308706	0.326776	0.356126	0.327603	0.506147	0.399534	0.42024	0.466324	0.47549	0.323706	0.233494	0.484433	0.013102	0.330275	0.461476	0.250654	0.33476	0.276686	0.308232	0.272189	0.407224	0.497588	0.431213	0.130232	0.444023	0.37895	0.107656	0.429022	0.477377	0.257977	0.129705	0.523838	0.372343	0.443578
C1	0.482555	0.421133	0.315003	0.385236	0.408637	0.333827	0.436551	0.365988	0.329616	0.252218	0.186345	0.221356	0.431477	0.327595	0.38998	0.331433	0.384263	0.367915	0.357219	0.516183	0.419674	0.448432	0.457342	0.47946	0.3057	0.23372	0.485822	0.0601728	0.329389	0.45424	0.277979	0.409187	0.269229	0.310202	0.265392	0.392404	0.515937	0.447683	-0.010224	0.467282	0.384162	-0.0642017	0.406868	0.429976	0.224491	0.044806	0.516751	0.389118	0.460177
C1	0.481369	0.434106	0.377831	0.409789	0.456632	0.347405	0.443412	0.399954	0.375999	0.349303	0.238558	0.277136	0.450693	0.386079	0.405271	0.379951	0.366837	0.399385	0.365612	0.503058	0.403921	0.40943	0.472485	0.493919	0.342557	0.337064	0.514472	0.0560147	0.368149	0.481124	0.300626	0.397473	0.328794	0.35152	0.325454	0.422479	0.49468	0.458241	0.129356	0.462008	0.38765	0.0916677	0.454817	0.459582	0.273472	0.124446	0.511767	0.390977	0.448473
C1	0.492796	0.446648	0.389233	0.399209	0.468726	0.35736	0.434571	0.377152	0.312272	0.271288	0.164434	0.193382	0.449471	0.372778	0.411238	0.380207	0.374186	0.364467	0.315812	0.492879	0.387396	0.421966	0.458174	0.488933	0.341201	0.285307	0.495933	0.116484	0.357818	0.468041	0.268428	0.284153	0.32418	0.356966	0.317313	0.382834	0.494528	0.431916	0.0986773	0.458967	0.375132	0.0691612	0.388252	0.462869	0.230983	0.107579	0.496908	0.383745	0.436105
C1	0.477254	0.41012	0.353254	0.366647	0.430418	0.35524	0.430454	0.383661	0.331076	0.260702	0.130334	0.22437	0.407425	0.308663	0.384561	0.414654	0.369925	0.408452	0.365866	0.493057	0.42598	0.414779	0.484188	0.485379	0.377146	0.338053	0.510464	0.0617555	0.381487	0.476096	0.257295	0.364394	0.378725	0.409523	0.374281	0.393085	0.513194	0.416577	0.0178023	0.422387	0.36086	-0.0188381	0.432769	0.398444	0.286468	0.0502288	0.510087	0.407155	0.433891
C2	0.494131	0.424588	0.332683	0.391215	0.43476	0.380024	0.449849	0.394317	0.362513	0.318694	0.216172	0.293197	0.438922	0.357944	0.425381	0.375064	0.383206	0.379189	0.345092	0.515489	0.414377	0.445262	0.477816	0.492003	0.342372	0.324028	0.470851	0.015999	0.377564	0.480452	0.324087	0.408569	0.326044	0.363586	0.32494	0.407373	0.509937	0.449409	0.0505234	0.465225	0.390933	-0.00375536	0.404254	0.500496	0.27942	0.0702946	0.504874	0.399586	0.450054
C2	0.508829	0.446512	0.274561	0.368534	0.415656	0.352186	0.461101	0.364219	0.288886	0.228406	0.089554	0.15547	0.437353	0.335407	0.419796	0.330379	0.358879	0.367753	0.289759	0.506219	0.425922	0.445496	0.453777	0.476172	0.321745	0.161023	0.477998	0.0576849	0.312888	0.466086	0.25014	0.251986	0.271944	0.307436	0.26913	0.385586	0.51043	0.462947	0.0138005	0.44149	0.380763	-0.0544443	0.382708	0.458955	0.222741	0.0525843	0.502024	0.382208	0.4529
C1	0.500181	0.449475	0.377507	0.404634	0.487391	0.359687	0.449402	0.383997	0.334219	0.290189	0.161472	0.207764	0.459724	0.354551	0.433162	0.40038	0.374414	0.40505	0.379193	0.495514	0.399165	0.418382	0.467166	0.496239	0.341934	0.296885	0.487773	0.0371944	0.387903	0.473343	0.328457	0.434191	0.319344	0.344655	0.317359	0.426624	0.492353	0.448076	0.116478	0.46881	0.391001	0.0834128	0.434363	0.469547	0.266916	0.113454	0.505704	0.395129	0.45131
C2	0.496408	0.417338	0.321304	0.374118	0.443132	0.376216	0.462805	0.393669	0.370527	0.304115	0.229735	0.293957	0.444056	0.343443	0.362659	0.345972	0.364824	0.36708	0.370784	0.52027	0.425931	0.428338	0.464414	0.482026	0.304827	0.227239	0.455801	0.010679	0.357659	0.474468	0.293658	0.372553	0.269804	0.314883	0.260078	0.416636	0.497831	0.461361	0.256647	0.474206	0.404225	0.23219	0.409593	0.452064	0.249832	0.194063	0.522559	0.396833	0.459292
C2	0.496165	0.441189	0.386444	0.413529	0.479936	0.387026	0.44461	0.407262	0.379345	0.338444	0.264253	0.303776	0.440008	0.384477	0.463008	0.404918	0.372476	0.379534	0.372829	0.501248	0.396304	0.406374	0.482239	0.50326	0.351896	0.311358	0.468716	0.0299425	0.376325	0.469709	0.350568	0.359148	0.334887	0.366624	0.331319	0.415748	0.496437	0.462674	0.217333	0.479511	0.400602	0.184795	0.420639	0.477625	0.31139	0.185246	0.519625	0.399693	0.452564
C2	0.495801	0.440907	0.311885	0.377273	0.437844	0.369064	0.459205	0.378686	0.334157	0.300595	0.190258	0.250324	0.420427	0.31288	0.369697	0.31476	0.38437	0.358231	0.34542	0.511316	0.422449	0.440364	0.463078	0.483678	0.341189	0.298683	0.436279	0.0319881	0.378748	0.478728	0.301516	0.354766	0.31292	0.346175	0.300185	0.411086	0.513029	0.465075	0.1841	0.460973	0.379609	0.161589	0.406117	0.511146	0.313298	0.14741	0.505135	0.394393	0.442421
C2	0.490683	0.426585	0.34122	0.404559	0.44121	0.361855	0.452847	0.362546	0.331171	0.250675	0.133743	0.203162	0.439871	0.327497	0.386458	0.336622	0.382777	0.348512	0.347922	0.504086	0.418153	0.445853	0.439624	0.487106	0.303519	0.27842	0.468417	0.00295016	0.309791	0.464515	0.329434	0.329613	0.268784	0.311811	0.269089	0.379986	0.479286	0.442932	0.144408	0.439738	0.370372	0.101283	0.399875	0.462534	0.224666	0.0836264	0.510564	0.383985	0.455419
C2	0.477152	0.426917	0.345312	0.393965	0.445535	0.365169	0.43006	0.381586	0.329588	0.279973	0.154276	0.208425	0.425915	0.343422	0.406777	0.366292	0.386594	0.378158	0.350409	0.493029	0.409507	0.424392	0.470796	0.49683	0.354657	0.304556	0.4929	0.00112258	0.335085	0.469496	0.307608	0.34706	0.318408	0.344861	0.309599	0.389363	0.47419	0.419608	0.044723	0.431043	0.368316	0.0192628	0.390041	0.447023	0.225387	0.0753106	0.522142	0.375473	0.448384
C1	0.51081	0.444748	0.363587	0.406725	0.469303	0.381596	0.470062	0.396135	0.347187	0.31826	0.196621	0.22308	0.450011	0.371664	0.427542	0.382819	0.383067	0.393508	0.368829	0.513914	0.40534	0.42975	0.470269	0.494402	0.355584	0.332157	0.489595	0.0305378	0.352342	0.464696	0.296994	0.355713	0.335612	0.356049	0.335524	0.427792	0.522466	0.449785	0.225679	0.467069	0.380697	0.201024	0.449052	0.459811	0.290612	0.178437	0.520889	0.404474	0.454314
C1	0.493942	0.436483	0.37333	0.400191	0.453288	0.380867	0.437024	0.387183	0.323765	0.280602	0.15492	0.188686	0.457141	0.356845	0.405807	0.364757	0.378905	0.402469	0.349398	0.49713	0.412411	0.436539	0.468383	0.487939	0.324141	0.350156	0.48884	0.0664874	0.369132	0.47798	0.234177	0.35124	0.333172	0.375984	0.33106	0.399527	0.499704	0.440781	0.123842	0.452606	0.369681	0.0799393	0.391689	0.432607	0.212355	0.1129	0.486669	0.392603	0.435847
C2	0.493182	0.463018	0.282556	0.381634	0.440661	0.383428	0.462471	0.386202	0.302122	0.205663	0.0542961	0.142813	0.44681	0.345494	0.379887	0.337341	0.409857	0.377009	0.329799	0.505994	0.424584	0.444111	0.462552	0.476119	0.310269	0.261438	0.483506	0.0763457	0.34796	0.476262	0.220504	0.276017	0.295736	0.330679	0.280327	0.379225	0.523891	0.436342	0.0402098	0.443419	0.387072	-0.00676595	0.387976	0.476017	0.244396	0.078915	0.508439	0.390981	0.469105
C2	0.483951	0.451993	0.270708	0.376904	0.402879	0.33905	0.439826	0.359288	0.325187	0.253345	0.126485	0.217712	0.427472	0.284147	0.339739	0.312754	0.376954	0.345529	0.322457	0.502416	0.408948	0.407875	0.449229	0.482786	0.308103	0.18393	0.480725	-0.00110774	0.327758	0.454932	0.266773	0.271225	0.251771	0.3131	0.24496	0.36744	0.491044	0.426405	0.0545677	0.414461	0.371885	-0.0206471	0.368076	0.4332	0.205486	0.0359957	0.514512	0.364737	0.435872
C1	0.4907	0.408741	0.359525	0.401583	0.452625	0.365123	0.429101	0.368087	0.331853	0.259051	0.122871	0.207134	0.422151	0.342281	0.434991	0.3879	0.391141	0.377482	0.337013	0.489017	0.404903	0.423732	0.459916	0.489927	0.329206	0.284338	0.470038	0.00309721	0.338121	0.470361	0.287347	0.343052	0.335953	0.363561	0.332103	0.381742	0.491531	0.439606	0.0873685	0.438589	0.365628	0.0308623	0.396782	0.418715	0.236451	0.0612878	0.512769	0.393296	0.438399
C1	0.490275	0.447879	0.375551	0.406286	0.474489	0.374567	0.452393	0.404225	0.370276	0.31787	0.220024	0.284723	0.46042	0.369027	0.446186	0.379061	0.367756	0.399483	0.34001	0.503866	0.413857	0.448936	0.4553	0.491207	0.335212	0.305783	0.494748	0.0226653	0.383674	0.469086	0.290501	0.376948	0.330038	0.363909	0.32297	0.416007	0.517658	0.476066	0.112291	0.458886	0.409329	0.0766734	0.418689	0.459773	0.217255	0.102572	0.494844	0.397508	0.449187
C2	0.48283	0.409341	0.34452	0.400209	0.404496	0.36139	0.457992	0.374339	0.325022	0.261517	0.168632	0.210997	0.430689	0.336987	0.360475	0.343981	0.370182	0.348599	0.370981	0.520667	0.439195	0.446929	0.462368	0.484825	0.319733	0.272092	0.479841	0.109228	0.310231	0.46773	0.284259	0.334679	0.297244	0.330742	0.288607	0.39735	0.50714	0.455934	0.120494	0.468818	0.393061	0.0823491	0.417699	0.434642	0.287349	0.0876364	0.517309	0.395817	0.454737
C2	0.512135	0.404173	0.321327	0.345996	0.377467	0.371559	0.4524	0.359382	0.28311	0.20853	0.071181	0.157427	0.424563	0.356864	0.370685	0.391302	0.435465	0.382405	0.332388	0.520624	0.434221	0.441058	0.469154	0.465113	0.334749	0.219728	0.450664	0.157315	0.382854	0.4618	0.257255	0.280969	0.276933	0.324098	0.285496	0.364119	0.515692	0.410338	0.0961472	0.448039	0.391215	0.0537549	0.376885	0.503039	0.214356	0.0418486	0.514527	0.400908	0.450927
C1	0.493901	0.459234	0.395971	0.417637	0.469286	0.39255	0.439884	0.385696	0.335133	0.324224	0.212096	0.220902	0.478554	0.355947	0.444794	0.385019	0.401425	0.387284	0.385511	0.481122	0.394442	0.411265	0.462505	0.502308	0.342265	0.356229	0.510932	0.0171393	0.373416	0.489153	0.247579	0.351712	0.34137	0.37438	0.337615	0.437295	0.505874	0.456841	0.297473	0.465472	0.412869	0.276744	0.439533	0.463682	0.29447	0.215667	0.510134	0.39598	0.430104
C2	0.503035	0.47569	0.318394	0.389436	0.421904	0.350042	0.457906	0.372361	0.323469	0.242406	0.131589	0.194912	0.453249	0.376652	0.449094	0.365684	0.440887	0.377928	0.38709	0.512833	0.42651	0.419124	0.453024	0.495507	0.322204	0.26778	0.465689	0.0513102	0.317275	0.472136	0.332866	0.321921	0.305317	0.334075	0.306234	0.382208	0.4843	0.429485	0.104435	0.447231	0.378392	0.0587392	0.400892	0.50796	0.285423	0.0971662	0.509175	0.393176	0.461038
C1	0.496173	0.407731	0.372521	0.398149	0.443838	0.342083	0.446461	0.364831	0.301548	0.250569	0.0864908	0.151715	0.425535	0.374949	0.427792	0.39546	0.370685	0.37499	0.362055	0.510659	0.420157	0.424385	0.46907	0.49701	0.343361	0.315147	0.470294	-0.026996	0.345205	0.489736	0.330419	0.395843	0.313203	0.33672	0.30543	0.388593	0.491776	0.454935	-0.00114214	0.44671	0.388072	-0.0399188	0.396635	0.444052	0.268936	0.0312083	0.519928	0.395813	0.456795
C2	0.485547	0.430943	0.33103	0.375377	0.418333	0.334663	0.44905	0.351025	0.291141	0.207664	0.0755958	0.154504	0.426657	0.288874	0.363066	0.33901	0.370719	0.370346	0.352249	0.522162	0.412955	0.453471	0.465201	0.484727	0.311975	0.204444	0.453348	0.0344876	0.339989	0.45868	0.297771	0.382337	0.274482	0.315165	0.28308	0.365247	0.513497	0.453617	0.0355402	0.438165	0.375952	-0.0010456	0.368217	0.415269	0.163347	0.0152848	0.506928	0.391342	0.458455
C1	0.500485	0.411419	0.361663	0.398412	0.44225	0.376484	0.438381	0.408826	0.392466	0.336385	0.270047	0.311454	0.445685	0.343627	0.424358	0.371138	0.386373	0.370781	0.341205	0.498767	0.414628	0.426128	0.461116	0.495581	0.339286	0.289845	0.481081	-0.0125168	0.374058	0.467365	0.325314	0.385806	0.316381	0.348966	0.309255	0.400138	0.493684	0.44036	0.119151	0.451884	0.364271	0.0748475	0.402325	0.44116	0.251845	0.122071	0.520612	0.391271	0.450532
C1	0.485041	0.444572	0.388634	0.414371	0.490325	0.348764	0.43708	0.392361	0.364679	0.328863	0.210197	0.239534	0.448795	0.365375	0.428417	0.404094	0.37162	0.402641	0.386164	0.482677	0.405492	0.400038	0.464615	0.514464	0.341846	0.358988	0.482419	-0.0507614	0.378393	0.475616	0.305302	0.359968	0.32147	0.34909	0.312131	0.415362	0.494389	0.434422	0.153886	0.452852	0.397357	0.120082	0.441778	0.410019	0.316392	0.155878	0.520712	0.39046	0.434762
C2	0.502936	0.433672	0.359866	0.417107	0.443777	0.365667	0.457137	0.377803	0.336432	0.298961	0.184147	0.186213	0.446305	0.362365	0.421976	0.367267	0.37813	0.393047	0.370842	0.510259	0.422266	0.432319	0.469007	0.505568	0.318586	0.287471	0.470712	0.00764216	0.342273	0.492123	0.278676	0.37738	0.318107	0.355272	0.316035	0.403757	0.491143	0.452099	0.182054	0.464525	0.384616	0.15009	0.412007	0.435118	0.301377	0.156694	0.504099	0.406267	0.457407
C1	0.494291	0.420046	0.346956	0.347065	0.445212	0.384338	0.44702	0.3915	0.342344	0.286748	0.232265	0.225588	0.433983	0.384778	0.396847	0.292341	0.384513	0.368561	0.350366	0.517818	0.412011	0.450931	0.46835	0.482383	0.303552	0.22398	0.473095	0.0375137	0.362486	0.464662	0.242555	0.371051	0.257225	0.290789	0.259394	0.416879	0.520849	0.458886	0.134856	0.480634	0.387947	0.104353	0.419465	0.432995	0.221185	0.110357	0.510083	0.383945	0.448948
C2	0.471794	0.433481	0.306095	0.380443	0.374501	0.355632	0.461342	0.350788	0.275154	0.189978	0.0802043	0.112112	0.402108	0.321626	0.376677	0.333747	0.37715	0.342214	0.353366	0.519941	0.408945	0.433592	0.463945	0.471285	0.315176	0.245389	0.41227	-0.0106124	0.313326	0.441496	0.29258	0.345293	0.257746	0.296644	0.260996	0.367421	0.505496	0.397257	0.236378	0.416565	0.407036	0.206202	0.428722	0.486265	0.171437	0.123566	0.521566	0.380357	0.454565
C1	0.499408	0.441528	0.385259	0.424748	0.503074	0.383364	0.442391	0.398485	0.348651	0.317628	0.194699	0.249201	0.452205	0.380723	0.451985	0.420344	0.36628	0.404323	0.364597	0.498364	0.403635	0.429914	0.469113	0.512168	0.369872	0.333595	0.487336	0.0456507	0.386283	0.466059	0.326961	0.362996	0.358759	0.386317	0.359655	0.411819	0.494201	0.444407	0.143881	0.471509	0.387768	0.0959019	0.426685	0.470781	0.302702	0.133377	0.519597	0.405475	0.451399
C2	0.496582	0.435707	0.310677	0.398379	0.453107	0.323619	0.451773	0.378959	0.338922	0.296135	0.17524	0.239619	0.437412	0.356681	0.37939	0.383215	0.36343	0.332821	0.377711	0.505854	0.409932	0.421323	0.471227	0.496123	0.334847	0.282568	0.475797	-0.0412179	0.347546	0.445511	0.346181	0.389384	0.281627	0.320943	0.280012	0.393634	0.474604	0.427924	0.18878	0.462798	0.392681	0.119439	0.412243	0.458975	0.250582	0.135662	0.515098	0.376557	0.452298
C1	0.490612	0.43655	0.347163	0.378904	0.424331	0.361131	0.424567	0.376813	0.347157	0.301836	0.120814	0.245973	0.436055	0.336944	0.416868	0.37647	0.390663	0.39842	0.390904	0.508007	0.423974	0.425625	0.462128	0.484684	0.316012	0.280543	0.477612	0.00872942	0.321912	0.467917	0.312475	0.417762	0.29548	0.339863	0.292982	0.402671	0.490048	0.414494	0.0299225	0.436826	0.400124	-0.021132	0.392983	0.43981	0.289941	0.00782974	0.506439	0.391029	0.453004
C2	0.48738	0.462708	0.341227	0.363352	0.440683	0.37881	0.449034	0.406451	0.367123	0.327332	0.266362	0.281068	0.454978	0.349785	0.389711	0.340889	0.375031	0.370341	0.358612	0.51009	0.425153	0.431112	0.468974	0.479222	0.319064	0.248859	0.511334	0.0903628	0.382657	0.458347	0.297764	0.317927	0.297501	0.344443	0.296045	0.437637	0.508019	0.46332	0.209577	0.466227	0.366038	0.184656	0.44879	0.448729	0.289066	0.192557	0.507796	0.398777	0.455896
C2	0.485155	0.441071	0.338075	0.377661	0.389331	0.361856	0.460218	0.380464	0.333012	0.257137	0.203835	0.232335	0.436622	0.352699	0.362593	0.298172	0.356597	0.328524	0.325064	0.518779	0.422044	0.43718	0.447308	0.483294	0.311729	0.246632	0.461114	0.029837	0.338996	0.442667	0.240911	0.273279	0.247234	0.283512	0.245737	0.423355	0.514907	0.460505	0.152008	0.477708	0.387224	0.105318	0.450098	0.433562	0.187636	0.0801313	0.517266	0.389936	0.46401
C1	0.492771	0.418112	0.388903	0.396181	0.494509	0.372508	0.439829	0.386777	0.325657	0.289683	0.171254	0.193924	0.437856	0.38172	0.456392	0.422606	0.350117	0.367221	0.349462	0.491331	0.400891	0.405985	0.476218	0.499881	0.364621	0.330683	0.488253	-0.0087304	0.342345	0.482172	0.322886	0.339555	0.359363	0.395652	0.356645	0.398741	0.4859	0.448094	0.07714	0.455539	0.387865	0.0321471	0.420589	0.461527	0.278203	0.107001	0.521141	0.402156	0.44932
C2	0.485133	0.409983	0.316348	0.405264	0.44126	0.343631	0.431055	0.371797	0.316554	0.257792	0.147127	0.214621	0.439522	0.266261	0.335682	0.325126	0.382125	0.345081	0.375074	0.499496	0.417151	0.419919	0.465135	0.482372	0.30094	0.251346	0.484215	-0.0201214	0.342988	0.474482	0.240304	0.374675	0.271424	0.317167	0.267863	0.386495	0.499906	0.439667	0.0966767	0.456997	0.377514	0.0594627	0.374109	0.422859	0.175052	0.0743695	0.508176	0.369451	0.448022
C2	0.478414	0.410907	0.312772	0.363753	0.410028	0.324892	0.439322	0.351083	0.308755	0.204174	0.119319	0.176294	0.413357	0.281642	0.353755	0.362112	0.360583	0.338994	0.335323	0.505697	0.41512	0.41307	0.460466	0.481166	0.302222	0.300419	0.408549	0.000956845	0.308867	0.458946	0.357259	0.425393	0.233978	0.255429	0.221657	0.377277	0.492369	0.416035	-0.0400902	0.422075	0.402913	-0.098494	0.404699	0.432459	0.159225	-0.011451	0.531257	0.373128	0.453822
C2	0.48091	0.438894	0.318558	0.387857	0.408014	0.349506	0.410375	0.370018	0.341747	0.285968	0.135537	0.219424	0.417389	0.336261	0.416971	0.381417	0.376837	0.38222	0.358388	0.488872	0.411028	0.435693	0.467633	0.497135	0.323223	0.291806	0.474375	0.052558	0.313169	0.478005	0.245802	0.465238	0.301716	0.341109	0.305031	0.384415	0.474644	0.433759	0.00656586	0.423877	0.366431	-0.0529027	0.406592	0.393469	0.295926	0.0340024	0.504046	0.382441	0.434849
C2	0.495341	0.429537	0.366478	0.398283	0.436412	0.36367	0.434234	0.38263	0.357757	0.32015	0.212993	0.250399	0.457801	0.319813	0.404321	0.370908	0.374887	0.371278	0.366967	0.514469	0.410132	0.426956	0.468151	0.503216	0.330843	0.302375	0.477122	-0.0190696	0.336453	0.485748	0.344485	0.403819	0.305668	0.343066	0.308239	0.413274	0.487347	0.467355	0.143163	0.470744	0.402481	0.0788267	0.433443	0.421006	0.254257	0.113298	0.517355	0.394452	0.46057
C1	0.48876	0.45486	0.336553	0.377691	0.442994	0.375757	0.445174	0.394118	0.362819	0.327478	0.217367	0.293546	0.440482	0.360587	0.410292	0.382026	0.355964	0.352108	0.326799	0.501433	0.424127	0.421154	0.458321	0.492686	0.374354	0.264722	0.457366	0.0154131	0.404005	0.479552	0.322726	0.376671	0.32166	0.341272	0.316569	0.418017	0.509658	0.455024	0.0846352	0.450114	0.38342	0.038739	0.41092	0.499113	0.304938	0.115766	0.528094	0.392079	0.455569
C2	0.484684	0.417464	0.325113	0.392207	0.405263	0.354408	0.44235	0.372287	0.341777	0.27772	0.17224	0.252944	0.432333	0.333656	0.360289	0.331069	0.381858	0.337039	0.375238	0.51083	0.424121	0.410779	0.471494	0.491219	0.299239	0.218606	0.467537	0.0334507	0.256523	0.458154	0.264425	0.333538	0.254043	0.28792	0.254206	0.399271	0.48256	0.465632	0.110237	0.464003	0.387961	0.0703105	0.420618	0.473192	0.237775	0.105947	0.514694	0.376502	0.451932
C2	0.498696	0.44446	0.340652	0.387788	0.460062	0.375404	0.456072	0.385289	0.336098	0.30022	0.175448	0.22241	0.438074	0.349903	0.406148	0.375156	0.370943	0.385811	0.350752	0.508081	0.412306	0.420084	0.45711	0.490127	0.33788	0.348111	0.464842	-0.00292109	0.390329	0.467451	0.29798	0.323765	0.296995	0.326951	0.289767	0.403101	0.522949	0.440024	0.241891	0.45971	0.381921	0.230851	0.400654	0.504811	0.310799	0.201631	0.527171	0.397536	0.455705
C2	0.487845	0.449133	0.340105	0.395176	0.417613	0.405225	0.439967	0.395631	0.369793	0.318629	0.257368	0.268742	0.460368	0.338099	0.369786	0.343832	0.378698	0.388655	0.36659	0.499418	0.415336	0.415845	0.47901	0.49524	0.313449	0.29155	0.51196	0.0590055	0.364661	0.470814	0.220873	0.386547	0.298284	0.333771	0.29072	0.430244	0.500456	0.451582	0.224174	0.474851	0.383055	0.188876	0.440776	0.464583	0.276851	0.189833	0.503069	0.385204	0.433097
C1	0.499483	0.454494	0.396647	0.397924	0.449957	0.377681	0.438969	0.389926	0.370155	0.319587	0.207741	0.245552	0.458709	0.36565	0.437888	0.364494	0.401401	0.379667	0.36796	0.496393	0.39735	0.441259	0.46614	0.500766	0.317271	0.303063	0.491294	0.0897349	0.349951	0.48282	0.268241	0.391024	0.308007	0.350099	0.306754	0.427091	0.490536	0.443822	0.240315	0.471331	0.402255	0.220588	0.432973	0.456008	0.283056	0.174397	0.503567	0.399752	0.442768
C2	0.499591	0.42972	0.344644	0.371522	0.447407	0.368229	0.451677	0.380899	0.325004	0.264421	0.182362	0.200409	0.435841	0.347275	0.391374	0.358273	0.396037	0.38016	0.361679	0.515269	0.424792	0.441687	0.465588	0.488215	0.313454	0.277496	0.48123	0.0449903	0.339841	0.466356	0.262008	0.260238	0.30494	0.348979	0.303674	0.38863	0.498349	0.437771	0.176009	0.459178	0.377037	0.147228	0.392326	0.436224	0.250666	0.131499	0.504405	0.395269	0.454233
C2	0.498889	0.433038	0.316649	0.40002	0.430279	0.352564	0.44755	0.387564	0.360312	0.27248	0.181405	0.265448	0.449293	0.304181	0.385152	0.372221	0.407683	0.370795	0.365514	0.511813	0.420461	0.447597	0.479139	0.498727	0.324225	0.279225	0.471996	0.0197652	0.301702	0.467749	0.348761	0.399118	0.288023	0.322482	0.286726	0.391123	0.477727	0.459455	0.0773568	0.46428	0.401309	0.00440762	0.425877	0.468892	0.25792	0.0603468	0.510744	0.383676	0.460948
C2	0.501114	0.455051	0.385371	0.396536	0.455487	0.400203	0.450591	0.387823	0.358207	0.294011	0.176901	0.213847	0.456909	0.369972	0.401945	0.37878	0.379849	0.399585	0.357888	0.507561	0.405757	0.426642	0.463874	0.49399	0.33164	0.33194	0.498502	0.0531864	0.36424	0.481258	0.267055	0.328479	0.332567	0.377044	0.335127	0.427465	0.503161	0.439027	0.163988	0.449535	0.359866	0.147035	0.467318	0.454455	0.294029	0.136944	0.502491	0.410178	0.44052
C2	0.494228	0.444209	0.376372	0.392134	0.465682	0.39669	0.451916	0.401026	0.372107	0.302509	0.211666	0.274274	0.437678	0.360805	0.418508	0.344154	0.370252	0.396101	0.364167	0.487114	0.396144	0.423816	0.468422	0.491785	0.318406	0.284628	0.50654	0.115933	0.331518	0.466933	0.284048	0.383633	0.28697	0.323221	0.287011	0.399297	0.481145	0.461463	0.163436	0.473436	0.378223	0.136325	0.399079	0.482986	0.251676	0.129214	0.513356	0.383388	0.444023
C2	0.491187	0.418817	0.379223	0.402368	0.463425	0.374904	0.42365	0.397618	0.357705	0.313759	0.208356	0.249691	0.438376	0.352319	0.404664	0.377864	0.376984	0.372519	0.345744	0.500029	0.401453	0.425579	0.46728	0.495484	0.32313	0.296046	0.497887	0.0823525	0.3304	0.48152	0.23853	0.437983	0.323057	0.361232	0.323043	0.41464	0.479555	0.45156	0.188072	0.470078	0.379137	0.163307	0.433625	0.439819	0.25347	0.148918	0.500053	0.391418	0.433757
C1	0.500545	0.445867	0.408096	0.438229	0.469967	0.388119	0.435215	0.410896	0.415989	0.370052	0.302946	0.338975	0.462352	0.390199	0.451954	0.395533	0.369944	0.406299	0.387195	0.490253	0.380578	0.408049	0.471737	0.505763	0.333952	0.345937	0.498819	-0.0519687	0.403512	0.475106	0.346419	0.432985	0.306569	0.343542	0.303913	0.443138	0.509123	0.466819	0.204401	0.484333	0.415766	0.17208	0.45407	0.4654	0.2969	0.19622	0.53237	0.402939	0.450973
C2	0.478439	0.430868	0.308199	0.381263	0.410776	0.332809	0.454705	0.360879	0.314482	0.235832	0.130145	0.197847	0.41876	0.310954	0.344183	0.276218	0.368999	0.338782	0.351291	0.512096	0.419419	0.446366	0.456918	0.475749	0.286909	0.241295	0.455534	0.0221525	0.296505	0.451338	0.276885	0.375191	0.232281	0.285928	0.235071	0.348951	0.492014	0.424399	0.0381612	0.422759	0.375236	-0.00938256	0.351536	0.425681	0.168824	0.0137494	0.510991	0.379099	0.452542
C1	0.494878	0.415441	0.351543	0.389075	0.456928	0.372327	0.445289	0.393316	0.361626	0.284594	0.180043	0.264841	0.447339	0.372383	0.410613	0.37921	0.383758	0.392191	0.372153	0.526116	0.413212	0.425576	0.47458	0.48762	0.342448	0.286933	0.463286	0.00745345	0.350836	0.471728	0.274389	0.358028	0.307758	0.332756	0.30357	0.395182	0.500064	0.463944	-0.0103428	0.469528	0.407208	-0.0551314	0.406967	0.438922	0.246691	0.04187	0.525978	0.407244	0.472162
C2	0.482352	0.414524	0.314789	0.351055	0.409782	0.367887	0.4393	0.381098	0.339351	0.307613	0.203669	0.241534	0.404271	0.310155	0.37119	0.313826	0.38012	0.370596	0.323746	0.512235	0.413446	0.441103	0.448089	0.4672	0.321433	0.25963	0.44814	0.0263813	0.381817	0.455239	0.262461	0.394312	0.26938	0.304002	0.260271	0.391613	0.500982	0.423971	0.112048	0.437439	0.373232	0.0725403	0.402909	0.487105	0.240411	0.0890009	0.513169	0.38915	0.453327
C2	0.497017	0.432935	0.300882	0.391899	0.440186	0.399235	0.461371	0.396248	0.355089	0.297691	0.237857	0.269883	0.460762	0.342645	0.379642	0.342728	0.355747	0.335774	0.366193	0.514735	0.424234	0.436155	0.460869	0.496525	0.319853	0.269885	0.483439	-0.00965465	0.344802	0.467138	0.292561	0.284905	0.251644	0.281357	0.247958	0.404363	0.526111	0.471121	0.244689	0.467429	0.395692	0.20737	0.416462	0.450375	0.281447	0.210237	0.533536	0.385664	0.461876
C1	0.487465	0.432422	0.349127	0.40399	0.465694	0.372147	0.440602	0.365218	0.313098	0.265807	0.127649	0.172664	0.424576	0.322899	0.41366	0.386484	0.357466	0.390019	0.335756	0.496563	0.420706	0.41055	0.468788	0.483733	0.317643	0.293997	0.467527	-0.0219654	0.343077	0.462982	0.309617	0.371788	0.300162	0.331401	0.296067	0.379414	0.489426	0.426978	0.126341	0.45069	0.378305	0.0868305	0.382269	0.431107	0.244987	0.0948416	0.511566	0.392632	0.449216
C1	0.494094	0.458039	0.380966	0.418971	0.469547	0.39371	0.420279	0.39726	0.383652	0.364878	0.238668	0.291257	0.455237	0.36339	0.441476	0.422534	0.361313	0.411931	0.407195	0.494083	0.398787	0.416549	0.469219	0.508645	0.35215	0.378846	0.467427	-0.0060601	0.366545	0.486263	0.31639	0.46351	0.340026	0.36869	0.338331	0.413876	0.496637	0.453855	0.209191	0.473123	0.4011	0.182217	0.433345	0.459563	0.328123	0.174345	0.515987	0.402448	0.448896
C2	0.497072	0.450169	0.409465	0.41232	0.461464	0.387448	0.435522	0.404186	0.389517	0.326013	0.253541	0.293806	0.467172	0.398402	0.445082	0.378929	0.413803	0.390252	0.383351	0.506098	0.41336	0.426476	0.473601	0.503269	0.33453	0.305003	0.483594	0.0876997	0.372194	0.483048	0.257611	0.420477	0.322708	0.356997	0.324413	0.43125	0.514972	0.472232	0.142686	0.486584	0.384378	0.130185	0.450403	0.438748	0.281829	0.144477	0.515634	0.40868	0.455407
C2	0.508294	0.412559	0.368335	0.375008	0.451487	0.377009	0.463926	0.395387	0.369087	0.287176	0.229585	0.268209	0.44789	0.371504	0.40233	0.359689	0.368389	0.371171	0.3716	0.517471	0.408088	0.438798	0.473202	0.480282	0.318093	0.246609	0.48654	0.0293877	0.393904	0.471198	0.264181	0.344214	0.281198	0.321323	0.279657	0.416848	0.533649	0.445717	0.123852	0.470799	0.385498	0.0869821	0.433049	0.452921	0.249079	0.126122	0.509839	0.395155	0.459739
C2	0.482492	0.422043	0.321923	0.358846	0.389993	0.351504	0.428344	0.387182	0.346122	0.291333	0.193236	0.245943	0.421951	0.327601	0.36032	0.327507	0.382201	0.37227	0.363223	0.503029	0.414557	0.424257	0.454367	0.487771	0.322503	0.271728	0.499618	0.0653139	0.336968	0.474183	0.246392	0.352853	0.301254	0.33859	0.302097	0.416137	0.509527	0.457085	0.196184	0.451944	0.37809	0.158015	0.426567	0.421002	0.226312	0.153676	0.499968	0.387608	0.440451
C1	0.493685	0.41695	0.369417	0.407978	0.478048	0.365532	0.441104	0.394861	0.359123	0.306679	0.230196	0.261757	0.439703	0.382229	0.424158	0.379883	0.378683	0.379227	0.380816	0.507815	0.416769	0.418733	0.47209	0.498352	0.34112	0.301135	0.485272	0.0248489	0.350112	0.478562	0.340802	0.40846	0.328701	0.356981	0.329628	0.399425	0.486139	0.436468	0.0295414	0.468952	0.395025	-0.0265766	0.420873	0.417601	0.258759	0.0626137	0.518244	0.392688	0.459414
C2	0.480433	0.409531	0.292877	0.36159	0.395621	0.359104	0.428646	0.370223	0.316025	0.268836	0.0841548	0.206356	0.409473	0.312807	0.384379	0.372238	0.36336	0.38879	0.304919	0.474694	0.404273	0.403955	0.471101	0.473079	0.349658	0.297964	0.504665	0.03648	0.321256	0.468462	0.24836	0.395054	0.341641	0.390796	0.337546	0.391678	0.498251	0.423992	0.121474	0.405485	0.350212	0.0999797	0.408854	0.428865	0.272988	0.110448	0.512784	0.390264	0.421984
C1	0.4892	0.424983	0.363694	0.39773	0.454569	0.350386	0.421698	0.377446	0.334597	0.293085	0.147336	0.194935	0.434315	0.349808	0.437936	0.404224	0.379437	0.388927	0.360851	0.483046	0.396364	0.414029	0.467796	0.497617	0.350124	0.363159	0.487541	0.0763033	0.336382	0.484988	0.270621	0.442294	0.357953	0.397043	0.362258	0.411931	0.480757	0.431647	0.0894225	0.434454	0.363173	0.0601327	0.440714	0.383157	0.304468	0.101791	0.504659	0.39725	0.434767
C1	0.498256	0.427218	0.381894	0.417933	0.439576	0.388991	0.428252	0.403899	0.387052	0.341426	0.233065	0.282877	0.440681	0.360352	0.422686	0.398277	0.392554	0.395217	0.35989	0.497993	0.401945	0.440033	0.470103	0.496128	0.333296	0.337694	0.499442	0.0471639	0.335992	0.477319	0.239838	0.397716	0.329505	0.364935	0.329732	0.421961	0.491148	0.445807	0.204445	0.467598	0.38276	0.19527	0.447811	0.441677	0.273597	0.167018	0.519916	0.393281	0.431858
C1	0.496176	0.422515	0.333555	0.373469	0.474934	0.360175	0.448787	0.383701	0.358264	0.298829	0.205927	0.260139	0.427092	0.304643	0.380099	0.350977	0.384049	0.355237	0.346583	0.509724	0.426884	0.43176	0.452137	0.498207	0.34248	0.292291	0.449402	0.029282	0.353826	0.484445	0.358123	0.381618	0.283635	0.315919	0.277019	0.417612	0.520235	0.446979	0.0465909	0.452458	0.432415	-0.0042032	0.412126	0.487448	0.199983	0.0413128	0.526437	0.385616	0.45368
C1	0.486338	0.436142	0.391119	0.383588	0.437285	0.383422	0.436022	0.397357	0.353187	0.31212	0.195424	0.26791	0.434659	0.337477	0.396927	0.399522	0.403059	0.41253	0.358292	0.498369	0.420274	0.430686	0.472821	0.485631	0.363266	0.359693	0.515028	0.0820802	0.37063	0.486077	0.27251	0.35258	0.366756	0.416126	0.366352	0.41811	0.521089	0.433409	0.101705	0.45283	0.390769	0.0753527	0.451817	0.406751	0.286231	0.135225	0.506556	0.410099	0.441365
C2	0.495165	0.419345	0.353614	0.387137	0.453759	0.371522	0.44247	0.385568	0.341693	0.291023	0.190167	0.228116	0.449343	0.358378	0.387731	0.367596	0.400141	0.386598	0.367589	0.516948	0.421897	0.429526	0.460401	0.493262	0.318725	0.320473	0.473107	0.0274877	0.359503	0.486261	0.29348	0.376534	0.315261	0.356816	0.315681	0.419061	0.514027	0.464782	0.120119	0.490325	0.383669	0.0773165	0.43952	0.462231	0.268925	0.113937	0.504243	0.39943	0.454057
C2	0.499912	0.438542	0.406622	0.388301	0.448252	0.406273	0.441082	0.39067	0.355088	0.311778	0.204388	0.254547	0.448072	0.37185	0.425751	0.376223	0.394112	0.390231	0.359119	0.510322	0.412941	0.428172	0.462684	0.49058	0.340728	0.313939	0.479376	0.0444937	0.393494	0.487214	0.289454	0.395886	0.327801	0.359162	0.325851	0.412083	0.517151	0.449534	0.151785	0.466871	0.393049	0.125452	0.427475	0.508746	0.311368	0.157496	0.514003	0.404055	0.448002
C2	0.491732	0.406778	0.358463	0.344634	0.433718	0.357653	0.47517	0.366508	0.310848	0.234841	0.120022	0.176947	0.414254	0.352861	0.372176	0.293654	0.376871	0.37401	0.352989	0.515276	0.415652	0.41093	0.458776	0.456022	0.300035	0.232386	0.477076	0.0431901	0.310177	0.460511	0.243022	0.271443	0.253432	0.294938	0.248092	0.398009	0.507295	0.442546	0.245703	0.46585	0.377917	0.220443	0.396359	0.488639	0.284262	0.173211	0.508919	0.392438	0.461041
C1	0.481507	0.414962	0.380213	0.395767	0.450956	0.392591	0.425516	0.402697	0.363207	0.324894	0.219151	0.277825	0.431813	0.350411	0.40603	0.398411	0.373315	0.406998	0.358442	0.488595	0.4156	0.422108	0.472192	0.484209	0.363354	0.378781	0.511407	0.0590716	0.397344	0.486561	0.237493	0.384308	0.367793	0.418615	0.365843	0.415184	0.509183	0.431487	0.113958	0.460747	0.397469	0.0976083	0.455308	0.410513	0.280335	0.145388	0.505054	0.407686	0.429726
C1	0.496634	0.44918	0.343608	0.396838	0.443739	0.400985	0.433248	0.385671	0.345139	0.297513	0.183558	0.231968	0.44342	0.362115	0.436511	0.365581	0.346084	0.393185	0.365493	0.502969	0.385162	0.402995	0.457383	0.494663	0.325281	0.303774	0.495707	0.0405889	0.372196	0.481393	0.350089	0.38159	0.309053	0.327053	0.299585	0.412651	0.50493	0.453331	0.207459	0.465783	0.378967	0.175636	0.442971	0.463508	0.29626	0.168214	0.510028	0.39498	0.461114
C2	0.493289	0.438198	0.352685	0.374087	0.411749	0.389121	0.460833	0.401951	0.386018	0.308614	0.24591	0.30165	0.447379	0.365761	0.365057	0.329553	0.394563	0.375196	0.375199	0.529307	0.423826	0.439834	0.474315	0.480478	0.316327	0.258506	0.456856	0.0200875	0.387026	0.479889	0.266601	0.381598	0.280813	0.325561	0.280133	0.402796	0.536846	0.453307	0.0859147	0.475586	0.389586	0.0456124	0.426914	0.488046	0.262199	0.074379	0.516006	0.399614	0.454747
C2	0.501954	0.431877	0.359885	0.414087	0.423355	0.367841	0.442948	0.373528	0.343	0.282495	0.167785	0.226141	0.454599	0.323151	0.410075	0.357578	0.392139	0.370412	0.356815	0.50863	0.401945	0.431256	0.465172	0.505461	0.309698	0.314816	0.486109	0.0742042	0.333092	0.474274	0.277427	0.437561	0.298903	0.33314	0.300875	0.404052	0.484668	0.436704	0.189561	0.458376	0.397437	0.153036	0.435434	0.421565	0.238964	0.114505	0.502637	0.384169	0.447063
C2	0.489412	0.431545	0.341234	0.389128	0.398553	0.348295	0.43994	0.374319	0.363825	0.281051	0.206336	0.254395	0.43502	0.30141	0.376973	0.345223	0.39739	0.38042	0.397998	0.521456	0.439247	0.440969	0.478031	0.502612	0.306922	0.273602	0.471996	-0.0144781	0.312963	0.478514	0.309372	0.430445	0.284875	0.316225	0.276667	0.397703	0.504535	0.451438	0.161474	0.466716	0.386701	0.118316	0.410792	0.425251	0.197936	0.102125	0.511478	0.393541	0.464069
C1	0.495535	0.435277	0.292346	0.344556	0.392934	0.356816	0.441404	0.352969	0.287704	0.277135	0.161535	0.173769	0.427693	0.312818	0.385516	0.309156	0.388107	0.368406	0.366462	0.482687	0.409998	0.43319	0.457023	0.466685	0.32473	0.238185	0.472749	0.0410874	0.368231	0.468787	0.253188	0.338522	0.264839	0.316063	0.263307	0.393245	0.514598	0.471604	0.174059	0.442787	0.36621	0.137157	0.413304	0.527544	0.29366	0.145241	0.510623	0.375294	0.43546
C2	0.483054	0.439541	0.270908	0.369389	0.400542	0.360194	0.459191	0.372855	0.318777	0.242945	0.142754	0.213247	0.426719	0.336544	0.382716	0.306783	0.344918	0.367619	0.309001	0.525363	0.427648	0.428841	0.456941	0.472049	0.331767	0.249073	0.454146	0.027921	0.300762	0.464654	0.233714	0.288025	0.279255	0.305693	0.260702	0.376394	0.495709	0.431015	0.127964	0.426376	0.38531	0.069811	0.38653	0.462531	0.193396	0.0629266	0.527352	0.386048	0.462108
C1	0.487151	0.415507	0.35511	0.378257	0.429747	0.34332	0.417953	0.367326	0.335662	0.281921	0.168417	0.208824	0.426717	0.342361	0.426386	0.389454	0.361743	0.372829	0.367683	0.495288	0.406445	0.446182	0.472848	0.485265	0.312769	0.283539	0.473151	0.0711868	0.341048	0.471555	0.298664	0.505764	0.286841	0.331471	0.287918	0.405346	0.47065	0.44203	0.101879	0.447662	0.359445	0.0749018	0.440202	0.408726	0.225162	0.0909356	0.51341	0.388808	0.441183
C1	0.489133	0.406464	0.339269	0.363056	0.453346	0.367191	0.444598	0.376549	0.320391	0.213786	0.0942645	0.195604	0.432031	0.336009	0.371211	0.335989	0.383587	0.362268	0.314519	0.496201	0.409414	0.422873	0.464486	0.47968	0.324582	0.264484	0.501808	0.033428	0.359944	0.466422	0.255566	0.303996	0.319718	0.367853	0.31692	0.382378	0.486001	0.428764	0.0638179	0.444385	0.355492	0.00598957	0.401059	0.438276	0.1825	0.0372426	0.497833	0.388369	0.437529
C2	0.494925	0.454243	0.343029	0.39205	0.471619	0.376928	0.45891	0.391556	0.363508	0.331036	0.236948	0.28844	0.472498	0.364695	0.40487	0.346783	0.345578	0.369963	0.306115	0.507997	0.42096	0.425752	0.465876	0.481938	0.315885	0.277497	0.465832	0.026999	0.346256	0.478545	0.272364	0.257261	0.275378	0.305138	0.267274	0.400606	0.493569	0.43331	0.0975662	0.465691	0.382458	0.0599934	0.405247	0.498838	0.265105	0.127463	0.523936	0.386816	0.456519
C2	0.495571	0.426794	0.340751	0.379751	0.426302	0.343051	0.449045	0.38508	0.348693	0.283894	0.197121	0.253016	0.444001	0.347227	0.379541	0.354564	0.376983	0.397685	0.365529	0.51548	0.418827	0.433639	0.466231	0.489291	0.317961	0.223489	0.453986	0.0360159	0.299653	0.474317	0.297447	0.42154	0.277178	0.307546	0.277654	0.37669	0.484578	0.454151	0.0738895	0.461594	0.385471	0.024581	0.40071	0.429922	0.241292	0.0662456	0.518189	0.390864	0.465716
C2	0.487894	0.408743	0.319755	0.378256	0.41206	0.326431	0.43713	0.370185	0.336907	0.270239	0.13546	0.204404	0.421061	0.282625	0.359855	0.363823	0.363965	0.376621	0.366664	0.505422	0.422817	0.457907	0.470723	0.486347	0.330898	0.264582	0.451255	0.0574381	0.337971	0.48846	0.304635	0.455307	0.319516	0.361656	0.322606	0.380696	0.485806	0.438574	0.129001	0.436291	0.36981	0.0936874	0.389124	0.403562	0.26722	0.1048	0.497691	0.393861	0.456538
C1	0.498562	0.441401	0.36689	0.397971	0.438268	0.379211	0.462027	0.394073	0.339841	0.298807	0.197704	0.22851	0.446339	0.34239	0.367289	0.339956	0.366828	0.365337	0.362241	0.530413	0.425326	0.438291	0.463849	0.48796	0.304008	0.299948	0.480097	0.0182612	0.340465	0.463239	0.279291	0.336217	0.280728	0.306212	0.276563	0.430334	0.520553	0.465533	0.222413	0.484628	0.384802	0.176018	0.449213	0.446509	0.232002	0.145997	0.517085	0.408038	0.473551
C1	0.503317	0.434685	0.384609	0.414468	0.444318	0.363474	0.440689	0.384548	0.354025	0.310312	0.174704	0.238327	0.452456	0.369919	0.460892	0.390241	0.381966	0.407692	0.378741	0.48667	0.399867	0.406671	0.468231	0.510026	0.335438	0.360318	0.51465	0.0459829	0.347542	0.481078	0.27234	0.377243	0.335101	0.37151	0.333206	0.423253	0.499843	0.450402	0.132508	0.454061	0.386402	0.0926861	0.439878	0.410574	0.319139	0.121312	0.506947	0.395953	0.440895
C1	0.497287	0.434126	0.352996	0.404555	0.450883	0.369126	0.444758	0.373766	0.325737	0.260203	0.116281	0.18131	0.443131	0.375088	0.429497	0.366341	0.376014	0.372749	0.35224	0.507368	0.415745	0.432208	0.454781	0.500007	0.314278	0.293685	0.47873	0.0164022	0.328692	0.467986	0.327798	0.408763	0.301997	0.351554	0.304918	0.402077	0.489762	0.438484	0.157429	0.450639	0.380191	0.110257	0.435113	0.410099	0.258174	0.0949434	0.512457	0.394791	0.448069
C2	0.494672	0.434583	0.380892	0.399348	0.450256	0.396029	0.43704	0.390193	0.354981	0.32622	0.207201	0.224129	0.455112	0.362896	0.433293	0.398138	0.39101	0.39997	0.396085	0.503845	0.403124	0.413435	0.46699	0.494613	0.337012	0.302521	0.499239	0.065455	0.397569	0.471298	0.327759	0.427118	0.320298	0.349942	0.313068	0.45628	0.528248	0.449024	0.354994	0.471026	0.385485	0.359174	0.487954	0.450907	0.319423	0.264592	0.518331	0.399134	0.442619
C2	0.492115	0.42231	0.322308	0.388764	0.405777	0.362537	0.462045	0.383022	0.330297	0.283905	0.213951	0.228946	0.444545	0.348189	0.374417	0.303614	0.367851	0.346463	0.335779	0.511649	0.427901	0.428623	0.456495	0.469988	0.312533	0.197084	0.494635	0.0605828	0.304537	0.467656	0.303445	0.312561	0.256327	0.302134	0.257051	0.39497	0.490047	0.462057	0.183687	0.457633	0.385871	0.148983	0.400541	0.462816	0.231296	0.14178	0.509038	0.380229	0.461208
C1	0.476247	0.439876	0.356063	0.390031	0.442453	0.35066	0.426111	0.382774	0.360451	0.288318	0.184409	0.270857	0.446883	0.339477	0.353562	0.357895	0.352343	0.360328	0.329846	0.508726	0.418353	0.43467	0.459701	0.488929	0.353593	0.285758	0.467365	0.0290072	0.354801	0.467299	0.286527	0.324528	0.307283	0.343818	0.301007	0.394249	0.505082	0.431617	0.0351866	0.433833	0.385294	-0.0199384	0.401796	0.467971	0.236874	0.0392967	0.529904	0.394265	0.454815
C2	0.495742	0.447531	0.36318	0.405419	0.470881	0.364031	0.462044	0.391847	0.349598	0.276725	0.173174	0.261861	0.448244	0.340858	0.409994	0.368924	0.392613	0.36217	0.360227	0.53362	0.429397	0.429421	0.458041	0.487482	0.299704	0.312403	0.484509	-0.016865	0.343091	0.475642	0.312525	0.287639	0.271367	0.321557	0.271993	0.379525	0.518409	0.470288	0.139974	0.477778	0.395583	0.103473	0.374149	0.474949	0.235432	0.112642	0.50094	0.402617	0.468912
C2	0.472917	0.429252	0.298664	0.356147	0.408196	0.363855	0.432555	0.377864	0.325594	0.311006	0.205196	0.221299	0.430936	0.332671	0.380039	0.366054	0.376337	0.356032	0.34531	0.493706	0.412532	0.437249	0.480106	0.484925	0.351717	0.263752	0.449327	-0.0244383	0.332949	0.461554	0.302058	0.313764	0.301399	0.335926	0.300375	0.383156	0.483365	0.447471	0.08026	0.422869	0.377139	0.0378846	0.400664	0.476269	0.230768	0.116452	0.520295	0.379619	0.44604
C2	0.506464	0.442204	0.315252	0.367898	0.414664	0.368858	0.470396	0.377435	0.316141	0.250874	0.115128	0.208329	0.466779	0.343383	0.375915	0.332674	0.373859	0.360357	0.35132	0.515216	0.421654	0.446119	0.456758	0.483205	0.30942	0.242219	0.510664	0.0181459	0.285606	0.468963	0.28376	0.306778	0.264132	0.310317	0.258517	0.395536	0.506163	0.445626	0.147964	0.46218	0.387534	0.124427	0.394081	0.506864	0.234639	0.110691	0.508622	0.386676	0.453627
C1	0.480876	0.424665	0.350664	0.378433	0.404181	0.307854	0.417785	0.358093	0.323277	0.239894	0.0903338	0.191405	0.403223	0.365781	0.402988	0.384573	0.373774	0.362967	0.301232	0.481863	0.395346	0.416651	0.465862	0.468954	0.316157	0.170525	0.466687	0.0706876	0.276365	0.472235	0.270553	0.503946	0.256657	0.295599	0.254529	0.33204	0.447591	0.414447	0.0236862	0.395464	0.33826	-0.0137842	0.350798	0.422652	0.225878	0.0323192	0.500368	0.380595	0.437158
C2	0.503497	0.442798	0.373387	0.41388	0.42967	0.368811	0.454558	0.390017	0.348159	0.30804	0.216634	0.253093	0.448936	0.358961	0.40707	0.382805	0.375288	0.373532	0.358238	0.520321	0.415029	0.417453	0.463436	0.498869	0.317213	0.296758	0.4775	0.0418705	0.323768	0.481366	0.300746	0.385264	0.309171	0.336828	0.304883	0.42508	0.506612	0.465509	0.239645	0.479214	0.39002	0.210069	0.449619	0.448243	0.265094	0.165426	0.50965	0.393993	0.458201
C1	0.490019	0.438782	0.357552	0.395445	0.469977	0.382914	0.429611	0.387605	0.362399	0.316444	0.213451	0.273869	0.450044	0.351075	0.427928	0.382907	0.383552	0.383496	0.378111	0.513346	0.403688	0.404756	0.461887	0.493181	0.338969	0.321426	0.459316	-0.0633636	0.3447	0.467696	0.33738	0.375711	0.307945	0.332145	0.302545	0.411509	0.513749	0.442199	0.114231	0.478142	0.391698	0.0615158	0.407973	0.441881	0.278983	0.109671	0.526143	0.392681	0.460161
C1	0.49946	0.442484	0.310078	0.419888	0.442787	0.345696	0.444168	0.370175	0.3174	0.245854	0.0725642	0.206105	0.427743	0.298844	0.413769	0.403416	0.408107	0.417734	0.352377	0.493547	0.412819	0.416789	0.463729	0.488545	0.37047	0.310043	0.463432	0.0457113	0.328186	0.475932	0.336807	0.357721	0.352393	0.396498	0.348916	0.362301	0.484975	0.445183	0.053066	0.455251	0.405764	-0.00953082	0.390111	0.481812	0.264314	0.0332849	0.503549	0.413974	0.444478
C1	0.494508	0.429486	0.375212	0.392206	0.442713	0.369978	0.461722	0.388272	0.367227	0.283717	0.209624	0.26497	0.438691	0.354038	0.394819	0.35501	0.381489	0.36597	0.362472	0.517626	0.423265	0.428003	0.472257	0.492492	0.314633	0.298517	0.498438	0.0224844	0.338337	0.464197	0.25302	0.377445	0.303634	0.33625	0.295852	0.429124	0.509823	0.448309	0.147861	0.47074	0.399907	0.129399	0.441064	0.45365	0.219367	0.124196	0.518813	0.399882	0.453737
C1	0.488797	0.429695	0.362723	0.409898	0.451394	0.414655	0.432438	0.403658	0.352022	0.325352	0.201886	0.257793	0.450353	0.330479	0.409728	0.386892	0.373458	0.394434	0.361145	0.499457	0.418295	0.426766	0.464119	0.499248	0.375292	0.4034	0.480676	0.0650127	0.404334	0.508813	0.287657	0.33526	0.358676	0.391709	0.354378	0.439759	0.51627	0.475372	0.166887	0.461925	0.432174	0.130215	0.44106	0.486002	0.287557	0.15584	0.519751	0.417159	0.450019
C2	0.484755	0.42613	0.299549	0.349597	0.397759	0.330744	0.440247	0.33597	0.278764	0.238065	0.0903633	0.150153	0.42929	0.308602	0.344457	0.29758	0.378143	0.362048	0.312415	0.508442	0.411494	0.451692	0.456038	0.455658	0.281792	0.294456	0.451817	0.0719513	0.264641	0.45194	0.277821	0.354595	0.250261	0.301155	0.239299	0.382562	0.476559	0.445162	0.0354352	0.437744	0.355798	-0.0256207	0.388485	0.473207	0.257513	0.0135265	0.506923	0.380348	0.446763
C2	0.501983	0.413296	0.322392	0.363342	0.429753	0.369243	0.446499	0.377523	0.347049	0.282918	0.122652	0.220657	0.416808	0.330019	0.384741	0.362649	0.387665	0.363559	0.335595	0.507963	0.432194	0.4237	0.447471	0.486387	0.340741	0.259647	0.44096	0.0941335	0.321689	0.485058	0.36147	0.38063	0.312215	0.339307	0.306204	0.404318	0.487467	0.471447	0.143692	0.417647	0.383949	0.11716	0.391374	0.448151	0.245487	0.0798264	0.50361	0.394735	0.44837
C1	0.478936	0.46862	0.341882	0.4124	0.418273	0.363488	0.456268	0.376476	0.3281	0.262536	0.151674	0.232208	0.429468	0.304034	0.330362	0.35005	0.379057	0.380654	0.375766	0.515122	0.420838	0.442355	0.469662	0.502564	0.320524	0.274258	0.484102	0.0427603	0.341098	0.475918	0.284775	0.331166	0.292584	0.331891	0.284218	0.391585	0.485226	0.45332	0.0911217	0.46788	0.391362	0.0578722	0.401594	0.457795	0.220461	0.0838555	0.502302	0.384676	0.456885
C2	0.477842	0.4206	0.313236	0.329793	0.410572	0.340151	0.439417	0.352081	0.30167	0.263927	0.160999	0.19755	0.417595	0.346026	0.379677	0.335204	0.364328	0.351884	0.339089	0.496673	0.425727	0.421024	0.470723	0.462119	0.332386	0.219334	0.467575	0.000864603	0.33829	0.461776	0.270255	0.295021	0.272604	0.298442	0.275671	0.385448	0.493322	0.463544	0.147779	0.422153	0.348976	0.100889	0.382945	0.489781	0.255632	0.119137	0.522188	0.381188	0.442134
C2	0.475584	0.464811	0.334125	0.363244	0.417903	0.357678	0.424957	0.35981	0.347822	0.276423	0.167859	0.226867	0.440837	0.348819	0.430303	0.324237	0.375357	0.355372	0.362569	0.485772	0.428317	0.436778	0.454029	0.462527	0.315815	0.305618	0.455617	0.0294899	0.336063	0.465975	0.256932	0.345123	0.288049	0.317284	0.277853	0.397097	0.493914	0.448218	0.169496	0.422972	0.369503	0.131061	0.398874	0.467246	0.264791	0.1253	0.522608	0.377397	0.444821
C2	0.484505	0.458155	0.361822	0.377822	0.401751	0.357015	0.451598	0.382523	0.347459	0.267682	0.214176	0.248063	0.443719	0.357304	0.340474	0.306706	0.379075	0.34641	0.357466	0.524737	0.412691	0.445033	0.452596	0.494439	0.296259	0.262251	0.48327	0.079405	0.326575	0.459756	0.247772	0.321666	0.254648	0.309037	0.254838	0.434193	0.519384	0.459992	0.200781	0.478206	0.378824	0.202206	0.454187	0.42058	0.187854	0.131141	0.515385	0.382116	0.458743
C1	0.463139	0.398167	0.298771	0.390718	0.428774	0.361288	0.420557	0.377822	0.323273	0.265279	0.123147	0.222719	0.387829	0.302446	0.39319	0.396032	0.39135	0.391673	0.346008	0.476875	0.416123	0.41834	0.472974	0.472334	0.350037	0.290874	0.502162	0.0386673	0.351742	0.46725	0.237191	0.387707	0.332129	0.378029	0.332695	0.38858	0.487887	0.429225	-0.00892157	0.410308	0.341541	-0.0521481	0.417278	0.383775	0.284863	0.0122307	0.510499	0.388522	0.42352
C2	0.468709	0.399862	0.301774	0.356451	0.391491	0.335768	0.422667	0.353937	0.325074	0.222875	0.143501	0.189783	0.410649	0.187546	0.314771	0.266121	0.391893	0.339112	0.341075	0.509386	0.373896	0.429817	0.449413	0.474023	0.273096	0.213239	0.448163	0.012155	0.271993	0.435813	0.28805	0.338793	0.214849	0.251705	0.204389	0.38807	0.492333	0.422549	0.0508276	0.447348	0.389473	0.0154908	0.37528	0.43409	0.170606	0.00958618	0.518665	0.354718	0.438968
C2	0.475334	0.431755	0.322407	0.399228	0.442214	0.359017	0.431492	0.375312	0.329275	0.267513	0.148828	0.202192	0.434876	0.327489	0.381627	0.363536	0.386706	0.355862	0.325733	0.494309	0.411974	0.427553	0.46106	0.49291	0.324089	0.266263	0.505193	0.0101725	0.292571	0.478182	0.308332	0.343567	0.31243	0.350199	0.307684	0.387579	0.473014	0.432889	0.203324	0.437319	0.37461	0.168116	0.39483	0.43795	0.233825	0.173359	0.505331	0.37662	0.434934
C1	0.490868	0.440911	0.424072	0.404005	0.470271	0.356438	0.430235	0.379815	0.354581	0.297233	0.156355	0.245148	0.428807	0.350309	0.419847	0.401913	0.367396	0.391468	0.341717	0.491561	0.392581	0.418106	0.465442	0.495075	0.338419	0.325813	0.490165	0.00275333	0.323261	0.482754	0.297123	0.393629	0.347182	0.388416	0.345675	0.394231	0.480951	0.441581	0.120245	0.454551	0.381883	0.0895061	0.409007	0.427025	0.308473	0.117316	0.504242	0.403539	0.445362
C2	0.501978	0.450841	0.369032	0.418924	0.474366	0.373674	0.461718	0.382671	0.321074	0.261782	0.127235	0.174905	0.44842	0.367326	0.425834	0.397841	0.38752	0.381125	0.380812	0.524505	0.424276	0.422549	0.473797	0.507253	0.319918	0.329195	0.473518	-0.0152953	0.333039	0.490352	0.291336	0.355674	0.310625	0.351252	0.305807	0.412344	0.516419	0.440537	0.143961	0.467644	0.405048	0.103159	0.420126	0.438163	0.252407	0.125534	0.515866	0.403934	0.461561
C2	0.478184	0.415091	0.317184	0.369987	0.463249	0.366433	0.417438	0.37	0.338882	0.293311	0.171845	0.228639	0.41423	0.353296	0.434999	0.365787	0.383409	0.372224	0.319796	0.494884	0.407382	0.429979	0.468927	0.483129	0.346224	0.284918	0.457148	0.00312619	0.338779	0.465056	0.324154	0.402417	0.30568	0.319195	0.299856	0.386241	0.478246	0.441289	0.0900914	0.44138	0.37217	0.0466835	0.390078	0.443704	0.295858	0.116162	0.523597	0.389624	0.452549
C2	0.477375	0.368688	0.294	0.384524	0.453947	0.363337	0.426136	0.359092	0.302165	0.226631	0.0935314	0.158505	0.426757	0.328875	0.399357	0.35341	0.366446	0.314615	0.303907	0.503846	0.412929	0.40008	0.442991	0.478718	0.303513	0.234049	0.471961	-0.0390402	0.303456	0.454207	0.267745	0.327901	0.258331	0.298038	0.246771	0.371325	0.481314	0.447859	0.0948697	0.433772	0.362483	0.0359094	0.377094	0.453884	0.160371	0.0475046	0.521797	0.371215	0.437234
C2	0.512168	0.43935	0.396435	0.424626	0.468587	0.390075	0.454047	0.382669	0.33378	0.293539	0.186016	0.214044	0.453745	0.366991	0.427196	0.377542	0.37494	0.374595	0.346704	0.511048	0.399245	0.404992	0.458651	0.497744	0.34751	0.290723	0.480117	0.000970226	0.401937	0.467598	0.336978	0.346311	0.31775	0.340426	0.314685	0.411099	0.514855	0.452518	0.113094	0.47725	0.406818	0.0656008	0.427743	0.446901	0.271525	0.146307	0.520088	0.40145	0.453696
C1	0.500587	0.446264	0.382209	0.401854	0.454836	0.379726	0.438716	0.387948	0.346433	0.282276	0.143251	0.228759	0.457758	0.385633	0.455362	0.386642	0.409157	0.412678	0.378111	0.493476	0.414522	0.428831	0.476101	0.490174	0.353041	0.30226	0.511953	0.05253	0.354068	0.479575	0.284331	0.338834	0.358392	0.397098	0.358775	0.386568	0.495904	0.42658	0.0790353	0.436591	0.382583	0.04041	0.392031	0.446699	0.280948	0.0985674	0.500365	0.403525	0.445696
C1	0.501446	0.431928	0.382502	0.412375	0.4885	0.384738	0.4373	0.391013	0.356954	0.325811	0.220264	0.233234	0.449711	0.404507	0.460593	0.419943	0.397758	0.408985	0.375456	0.500043	0.405018	0.405924	0.479432	0.509976	0.370061	0.343874	0.484746	0.0235707	0.38122	0.485731	0.327392	0.413989	0.362522	0.379677	0.356996	0.431567	0.49399	0.458276	0.229212	0.469604	0.401375	0.197589	0.457814	0.475652	0.331848	0.215369	0.52462	0.403641	0.44844
C1	0.508684	0.443997	0.381328	0.408606	0.48659	0.410331	0.451521	0.408924	0.38756	0.374992	0.269231	0.295513	0.464465	0.381943	0.433634	0.385303	0.365874	0.395133	0.37923	0.507176	0.399628	0.420029	0.470017	0.499997	0.346578	0.296354	0.493301	0.0216006	0.429222	0.465726	0.308154	0.429066	0.305117	0.321598	0.305843	0.456222	0.52407	0.479388	0.297978	0.491413	0.431207	0.277718	0.459564	0.482167	0.317899	0.255596	0.527317	0.400323	0.450354
C1	0.504102	0.428241	0.365964	0.391243	0.467955	0.364352	0.47242	0.378345	0.341176	0.270754	0.186667	0.241542	0.440073	0.391244	0.426978	0.349351	0.351467	0.357747	0.307776	0.50193	0.389929	0.420223	0.454673	0.493156	0.307888	0.234378	0.460431	-0.010997	0.316662	0.464893	0.289602	0.361081	0.282399	0.324714	0.278995	0.40278	0.495797	0.456391	0.130542	0.461059	0.380033	0.070153	0.424611	0.466461	0.267984	0.0824819	0.519491	0.384747	0.453827
C1	0.486333	0.426837	0.350748	0.384295	0.420337	0.365446	0.428508	0.37068	0.335044	0.251442	0.149379	0.216917	0.440629	0.338567	0.374322	0.344751	0.392385	0.336668	0.354238	0.524376	0.421563	0.428332	0.470224	0.493681	0.332838	0.265136	0.479721	0.0478998	0.373531	0.47341	0.281263	0.364341	0.306273	0.340862	0.301156	0.391113	0.510535	0.454558	0.0247566	0.461604	0.387481	-0.0124963	0.3966	0.456903	0.230827	0.0336193	0.515427	0.391678	0.459091
C2	0.494126	0.419868	0.39732	0.419116	0.463276	0.383983	0.444583	0.398813	0.371547	0.317005	0.218202	0.252935	0.443558	0.374308	0.435475	0.386895	0.392918	0.400339	0.377497	0.501551	0.407586	0.426499	0.465629	0.489476	0.343668	0.299486	0.477723	0.051514	0.356506	0.47456	0.272122	0.404689	0.333017	0.368978	0.333227	0.425844	0.497034	0.457693	0.188647	0.470525	0.379025	0.172076	0.454104	0.433759	0.290787	0.174991	0.510397	0.406419	0.450214
C1	0.479915	0.407673	0.329083	0.378228	0.435893	0.342771	0.434502	0.38359	0.349599	0.297151	0.204886	0.238517	0.426449	0.3509	0.404633	0.351618	0.358193	0.37213	0.325369	0.482809	0.410699	0.414902	0.481904	0.479803	0.348123	0.308015	0.505423	0.0501549	0.356434	0.471239	0.307148	0.30574	0.326316	0.361722	0.325989	0.400238	0.482563	0.444978	0.171557	0.45449	0.358815	0.151763	0.422154	0.429986	0.29218	0.13721	0.509326	0.385152	0.435423
C2	0.492897	0.463012	0.367816	0.375678	0.446688	0.352576	0.4623	0.380257	0.340138	0.262211	0.204066	0.231029	0.456938	0.357661	0.402192	0.279197	0.408321	0.337727	0.344318	0.525349	0.40528	0.442347	0.451072	0.47548	0.306697	0.240303	0.464216	0.0029174	0.308237	0.446793	0.26904	0.266491	0.24295	0.290511	0.240999	0.436836	0.516912	0.45932	0.1429	0.483503	0.36657	0.123598	0.45496	0.465383	0.209399	0.117056	0.51421	0.381999	0.450561
C1	0.48766	0.419227	0.365833	0.398194	0.449127	0.351917	0.447615	0.358403	0.31006	0.238395	0.112514	0.163054	0.439899	0.343829	0.411611	0.358529	0.352368	0.315939	0.337401	0.486364	0.40523	0.421059	0.456478	0.484679	0.287933	0.225725	0.493956	-0.0108857	0.301014	0.472449	0.262483	0.425934	0.267389	0.327088	0.264139	0.38914	0.466175	0.453307	0.15317	0.439841	0.367197	0.108758	0.390755	0.441496	0.218292	0.0617712	0.510523	0.371806	0.435422
C1	0.486757	0.423944	0.354704	0.40341	0.43811	0.355738	0.448808	0.381178	0.34045	0.31531	0.192855	0.239676	0.435988	0.360202	0.403348	0.377141	0.360016	0.364813	0.375765	0.501956	0.405156	0.418098	0.46742	0.496495	0.324827	0.314923	0.475967	-0.0268303	0.35682	0.473672	0.322036	0.403855	0.301835	0.330262	0.300137	0.400325	0.482135	0.455044	0.0499592	0.466728	0.393098	-0.0219329	0.426491	0.460113	0.249563	0.0575157	0.524768	0.397058	0.458102
C1	0.502807	0.431061	0.342209	0.400128	0.468466	0.379796	0.463866	0.389753	0.334918	0.290853	0.208952	0.220171	0.45199	0.371083	0.411835	0.356754	0.394976	0.393135	0.367376	0.514578	0.413234	0.438305	0.459761	0.494607	0.313935	0.309734	0.517355	0.0369253	0.344128	0.468114	0.297827	0.373008	0.299753	0.332192	0.2968	0.408508	0.499416	0.4397	0.219975	0.460715	0.389042	0.194714	0.428626	0.462674	0.257298	0.167485	0.507649	0.391778	0.457082
C2	0.487013	0.447377	0.302895	0.388861	0.397264	0.357294	0.458449	0.370331	0.3222	0.246689	0.117417	0.24881	0.429275	0.331101	0.352888	0.300552	0.395517	0.360016	0.317963	0.520191	0.419436	0.438508	0.454337	0.46586	0.30402	0.280236	0.437241	0.0420875	0.277213	0.44808	0.241339	0.243978	0.254194	0.305071	0.248187	0.382519	0.488346	0.442562	0.0649263	0.439837	0.371551	0.055936	0.394452	0.519848	0.22949	0.0389871	0.509368	0.390592	0.450701
C2	0.501327	0.431169	0.387289	0.383035	0.42973	0.408316	0.449222	0.395854	0.375881	0.329283	0.249803	0.262548	0.450074	0.36874	0.436265	0.372558	0.372234	0.416478	0.373726	0.495597	0.414984	0.429278	0.477213	0.502287	0.33162	0.362278	0.506119	0.0711803	0.400282	0.472323	0.274056	0.398144	0.32926	0.364281	0.32901	0.435734	0.51781	0.46251	0.171738	0.46774	0.38244	0.138593	0.46745	0.449035	0.279717	0.166773	0.517215	0.403222	0.447596
C1	0.464893	0.397059	0.299567	0.376478	0.415868	0.32995	0.4162	0.361525	0.314576	0.246956	0.0924879	0.189756	0.393048	0.312516	0.369194	0.392646	0.358514	0.363435	0.324553	0.470772	0.409326	0.416281	0.476598	0.473216	0.352561	0.232883	0.47692	0.049772	0.317506	0.48	0.232614	0.456184	0.323517	0.367495	0.323912	0.368611	0.469616	0.424187	-0.0171322	0.397135	0.326909	-0.0569815	0.400293	0.384878	0.220947	-0.0152732	0.510604	0.381986	0.425779
C2	0.483173	0.407219	0.332158	0.376292	0.411261	0.368325	0.434217	0.377276	0.31791	0.280476	0.15776	0.196205	0.427271	0.329125	0.399467	0.377076	0.375665	0.386231	0.332269	0.492529	0.4159	0.419965	0.473652	0.494366	0.350385	0.293889	0.522354	0.0536665	0.318912	0.468654	0.286902	0.403269	0.355214	0.391774	0.35276	0.400341	0.491891	0.427066	0.139715	0.443098	0.369897	0.114899	0.407167	0.444579	0.239082	0.124711	0.501478	0.393796	0.436079
C2	0.477177	0.413487	0.279284	0.405555	0.408138	0.365487	0.450542	0.378739	0.335305	0.263628	0.207289	0.251823	0.41918	0.304981	0.392676	0.318712	0.413107	0.377876	0.368395	0.505835	0.429757	0.417457	0.471839	0.484296	0.338889	0.315591	0.414935	0.0220684	0.380555	0.465507	0.272245	0.275563	0.274589	0.309055	0.260308	0.408976	0.495596	0.44242	0.19028	0.430526	0.389018	0.15956	0.450535	0.521288	0.351479	0.197924	0.529662	0.391348	0.446065
C1	0.494642	0.45027	0.373131	0.401552	0.46394	0.391858	0.423446	0.396668	0.382091	0.342677	0.216883	0.290991	0.451047	0.380821	0.459151	0.407942	0.396684	0.406196	0.365132	0.489959	0.395344	0.410894	0.470343	0.500671	0.340757	0.362331	0.489445	0.0758244	0.376873	0.473916	0.258978	0.435576	0.332569	0.374047	0.33549	0.41174	0.496324	0.457171	0.17286	0.467216	0.377415	0.160729	0.434454	0.440784	0.301609	0.170041	0.520871	0.403959	0.436498
C2	0.428888	0.375625	0.277201	0.311396	0.353548	0.335166	0.426712	0.342735	0.311081	0.254485	0.181405	0.202683	0.378062	0.288087	0.301315	0.176116	0.368257	0.317637	0.285035	0.479302	0.397333	0.420306	0.436189	0.433982	0.30577	0.241044	0.374096	-0.0442714	0.247991	0.420689	0.132938	0.223002	0.198783	0.267471	0.173977	0.360341	0.470397	0.452976	0.0817345	0.410657	0.339206	0.032527	0.367416	0.474015	0.239933	0.0043375	0.51461	0.338319	0.421676
C2	0.474069	0.412576	0.333516	0.378076	0.449677	0.343288	0.441172	0.3755	0.327148	0.262579	0.118764	0.204267	0.409975	0.328592	0.396488	0.374862	0.378589	0.379689	0.327311	0.4736	0.413218	0.413954	0.487197	0.478701	0.357884	0.273307	0.498284	0.0302726	0.285005	0.483704	0.273539	0.367082	0.354144	0.395459	0.348759	0.373031	0.478191	0.406169	-0.0138158	0.39894	0.34384	-0.0431553	0.395924	0.406209	0.257442	0.0533921	0.509916	0.385345	0.429519
C1	0.498187	0.448104	0.404848	0.431254	0.461514	0.410533	0.447665	0.418281	0.398263	0.333816	0.289596	0.304169	0.477576	0.391696	0.439948	0.389013	0.399529	0.407618	0.431055	0.518285	0.414325	0.437694	0.477295	0.503682	0.331859	0.322006	0.49674	0.0395248	0.37779	0.475153	0.296495	0.376751	0.321568	0.353286	0.313739	0.452829	0.521346	0.452588	0.231748	0.490604	0.424702	0.21967	0.462163	0.460647	0.289583	0.21888	0.520628	0.412821	0.466953
C1	0.485668	0.421427	0.367016	0.396557	0.446792	0.363151	0.452012	0.386663	0.352494	0.308303	0.223737	0.231082	0.440862	0.350216	0.374036	0.352675	0.36237	0.36946	0.321526	0.497012	0.408227	0.41617	0.461015	0.493108	0.332571	0.287799	0.504141	0.0393639	0.373054	0.46969	0.305567	0.339067	0.286783	0.309539	0.276071	0.395705	0.502911	0.478783	0.1886	0.462951	0.390321	0.165371	0.410754	0.460181	0.239589	0.168202	0.526289	0.377729	0.442725
C1	0.478945	0.406842	0.363536	0.38034	0.432952	0.361872	0.428454	0.38278	0.316206	0.259539	0.146617	0.219933	0.399113	0.303485	0.395254	0.415015	0.377867	0.408373	0.380892	0.4826	0.415901	0.411843	0.478228	0.47964	0.355804	0.362798	0.492285	0.0359269	0.34255	0.460013	0.233417	0.33163	0.363279	0.393509	0.360781	0.386287	0.499721	0.415147	0.00823671	0.420736	0.360425	-0.0349531	0.420875	0.402127	0.282404	0.0639968	0.504569	0.392685	0.432675
C1	0.509939	0.453269	0.381259	0.398431	0.460764	0.363305	0.471785	0.380094	0.331996	0.280942	0.18388	0.210542	0.4402	0.363277	0.433317	0.399362	0.385899	0.398648	0.390027	0.509481	0.417474	0.410918	0.480805	0.490773	0.352471	0.330565	0.500837	0.024723	0.358764	0.47028	0.244134	0.297469	0.339147	0.370838	0.332689	0.41534	0.499585	0.453968	0.18852	0.470517	0.412132	0.162656	0.413936	0.470822	0.263557	0.170343	0.514085	0.409617	0.454775
C2	0.493159	0.471392	0.311537	0.362793	0.404677	0.367708	0.458134	0.379926	0.348411	0.296171	0.205551	0.230531	0.444651	0.275243	0.375593	0.340809	0.403918	0.380774	0.380789	0.508414	0.412484	0.433979	0.466696	0.485418	0.352428	0.263413	0.450974	0.0478673	0.391268	0.478641	0.212551	0.385246	0.330117	0.359499	0.317407	0.410595	0.517162	0.461813	0.217106	0.440186	0.385287	0.18835	0.394679	0.529154	0.281011	0.159651	0.510668	0.395787	0.440428
C2	0.477603	0.4254	0.323671	0.336413	0.41433	0.358627	0.419552	0.373382	0.335929	0.280091	0.210045	0.242217	0.41925	0.335638	0.383032	0.317872	0.381244	0.342659	0.358063	0.522235	0.425074	0.430087	0.457615	0.45338	0.320499	0.224081	0.444416	0.00601623	0.347586	0.472418	0.288191	0.321736	0.252984	0.296289	0.248238	0.415692	0.508818	0.447524	0.0825529	0.470974	0.370012	0.0532529	0.446713	0.466232	0.248291	0.10246	0.52903	0.385543	0.451828
C2	0.488007	0.461787	0.334466	0.389011	0.446082	0.376886	0.451634	0.379096	0.324662	0.27563	0.13642	0.22376	0.454414	0.372277	0.43859	0.373388	0.379915	0.390608	0.367074	0.49185	0.403126	0.41764	0.45493	0.501225	0.305107	0.305339	0.477592	0.0734602	0.303775	0.489241	0.288434	0.38773	0.309558	0.342685	0.299478	0.400753	0.472854	0.454192	0.120807	0.469865	0.407485	0.0784679	0.407026	0.455318	0.227041	0.0917728	0.499001	0.386196	0.443853
C2	0.483493	0.446291	0.332176	0.374366	0.459518	0.386263	0.434803	0.392891	0.37533	0.284636	0.186363	0.270306	0.442569	0.348303	0.414874	0.36591	0.37791	0.390756	0.363867	0.504665	0.418557	0.423192	0.478748	0.502474	0.336952	0.267937	0.483106	0.0124206	0.340526	0.477764	0.314858	0.408662	0.318663	0.3433	0.307321	0.408624	0.522871	0.453833	-0.00299609	0.475735	0.397068	-0.0608721	0.401124	0.45085	0.237199	0.0368312	0.519551	0.395908	0.45638
C1	0.499439	0.444071	0.307681	0.384183	0.447005	0.372796	0.457478	0.387349	0.33882	0.269561	0.126042	0.20166	0.434547	0.363253	0.420418	0.396262	0.40098	0.415016	0.3638	0.52118	0.421219	0.450846	0.469458	0.49958	0.346763	0.33256	0.471109	0.0157105	0.383628	0.482016	0.279489	0.309526	0.331088	0.363569	0.33077	0.389972	0.506569	0.420159	0.159436	0.435734	0.382442	0.122274	0.407286	0.47419	0.32012	0.156408	0.517852	0.410808	0.464437
C1	0.499299	0.436349	0.4119	0.410236	0.449339	0.378734	0.450419	0.391061	0.351383	0.320375	0.229053	0.238124	0.458398	0.382687	0.458812	0.390849	0.388493	0.408452	0.354471	0.506428	0.39477	0.39921	0.484789	0.503556	0.346185	0.328987	0.506829	0.0304381	0.385021	0.468525	0.249809	0.358637	0.337762	0.377702	0.338125	0.431087	0.517337	0.447076	0.17942	0.480408	0.393726	0.155131	0.466144	0.449619	0.279056	0.179082	0.521254	0.396236	0.438774
C2	0.467039	0.416145	0.317616	0.364495	0.393957	0.322605	0.425205	0.362602	0.321391	0.237713	0.103173	0.211222	0.395669	0.323823	0.393267	0.387672	0.373915	0.357666	0.320193	0.467296	0.403445	0.40713	0.468873	0.477403	0.337877	0.232277	0.471963	0.0539843	0.308263	0.466899	0.236174	0.381202	0.329953	0.362597	0.32685	0.365579	0.456926	0.408117	-0.0383124	0.403776	0.34395	-0.0758967	0.407551	0.363602	0.218612	-0.0109713	0.507988	0.373829	0.424212
C2	0.511207	0.451573	0.417451	0.391046	0.464459	0.375475	0.451797	0.401744	0.360136	0.306305	0.189927	0.256947	0.450555	0.361628	0.418926	0.403104	0.38407	0.379791	0.371392	0.533541	0.413127	0.438451	0.467346	0.496488	0.3315	0.307302	0.482439	0.0259353	0.349248	0.475346	0.283594	0.299342	0.302482	0.353052	0.305361	0.407627	0.515414	0.481947	0.147596	0.475199	0.395485	0.1043	0.408771	0.468507	0.251164	0.112918	0.517238	0.404636	0.461789
C2	0.497358	0.42895	0.334056	0.354845	0.461152	0.351566	0.453843	0.367303	0.319873	0.264044	0.1446	0.223161	0.444967	0.338971	0.40604	0.341932	0.403102	0.412579	0.395075	0.511373	0.418979	0.428499	0.448864	0.485977	0.326281	0.2565	0.501866	-0.00489134	0.337996	0.454025	0.277365	0.291128	0.285386	0.310188	0.270952	0.390547	0.514621	0.440375	0.0879326	0.465632	0.387215	0.0392955	0.399117	0.47547	0.272971	0.0865618	0.522467	0.391574	0.465244
C1	0.48639	0.431995	0.330341	0.37849	0.447112	0.372761	0.44265	0.370876	0.29884	0.30163	0.213036	0.189923	0.424895	0.341767	0.372147	0.318338	0.341159	0.315203	0.305158	0.496976	0.404025	0.406279	0.454787	0.48568	0.33714	0.241875	0.494195	0.0108894	0.326094	0.45016	0.287381	0.254152	0.285484	0.323012	0.273054	0.390822	0.485711	0.431002	0.14125	0.42382	0.363913	0.117961	0.391459	0.454103	0.20865	0.117339	0.515847	0.369104	0.438422
C1	0.490157	0.427861	0.344794	0.406023	0.452915	0.347728	0.433348	0.373807	0.337447	0.277813	0.15494	0.214549	0.448894	0.37008	0.428898	0.36523	0.409462	0.371601	0.366368	0.495024	0.404222	0.425752	0.468322	0.501196	0.324945	0.304576	0.488386	-0.0246578	0.371371	0.465603	0.341714	0.435884	0.319733	0.364835	0.318315	0.391463	0.472598	0.431027	0.110692	0.452375	0.380157	0.0534643	0.41483	0.406959	0.266267	0.0840089	0.50476	0.38486	0.446982
C2	0.501047	0.46853	0.345291	0.353401	0.409234	0.384487	0.45925	0.382969	0.345063	0.289343	0.217648	0.255646	0.450224	0.347185	0.394671	0.326595	0.395467	0.37924	0.351813	0.522541	0.431858	0.436137	0.459062	0.475938	0.303958	0.270601	0.474649	0.00806824	0.362378	0.46872	0.311183	0.343178	0.2602	0.297279	0.254422	0.414552	0.524739	0.440222	0.253296	0.457531	0.374353	0.227556	0.421251	0.521407	0.287544	0.18423	0.521836	0.390854	0.457498
C1	0.49354	0.444514	0.379263	0.396468	0.478398	0.389605	0.436997	0.385852	0.338274	0.316235	0.205923	0.222342	0.463055	0.369344	0.435485	0.385181	0.37506	0.400224	0.371811	0.496585	0.400708	0.425827	0.466079	0.495539	0.33886	0.369585	0.491207	0.0636613	0.355016	0.478562	0.249966	0.356293	0.35212	0.390096	0.353618	0.420942	0.494355	0.427526	0.185068	0.459949	0.407112	0.169281	0.442226	0.434849	0.287045	0.155265	0.503133	0.398613	0.43632
C2	0.503379	0.432554	0.393362	0.40378	0.449554	0.389294	0.4436	0.398926	0.345614	0.283242	0.236674	0.256631	0.443003	0.344524	0.395701	0.355007	0.380746	0.334338	0.322491	0.505911	0.411885	0.424271	0.467444	0.495846	0.331376	0.268922	0.505301	0.0232489	0.335219	0.468812	0.282003	0.29809	0.306729	0.337081	0.301415	0.395616	0.502577	0.451049	0.227762	0.472152	0.394826	0.208268	0.397214	0.506248	0.259821	0.183814	0.508281	0.388821	0.448646
C2	0.494826	0.439241	0.348494	0.380307	0.401158	0.362828	0.44329	0.379004	0.340286	0.286665	0.195621	0.221787	0.444172	0.356019	0.39487	0.33427	0.401035	0.380971	0.34197	0.517589	0.418849	0.440218	0.47276	0.48206	0.323929	0.268885	0.483945	0.0800472	0.385722	0.475565	0.299505	0.399109	0.29529	0.331322	0.29493	0.406924	0.518594	0.443488	0.0747736	0.466381	0.38187	0.0263274	0.415913	0.467116	0.271651	0.0783678	0.506318	0.391794	0.446481
C1	0.49008	0.431283	0.352134	0.389121	0.437241	0.376534	0.431426	0.39478	0.363368	0.304898	0.22057	0.269162	0.439223	0.38007	0.441154	0.371835	0.375623	0.37437	0.333446	0.501969	0.404117	0.43401	0.466458	0.493456	0.310812	0.273979	0.501338	0.0783695	0.32308	0.471654	0.267227	0.436133	0.303141	0.330166	0.301052	0.396814	0.490072	0.435073	0.120297	0.459598	0.386349	0.0718452	0.407195	0.446252	0.251585	0.090586	0.512915	0.390353	0.443642
C1	0.489398	0.427937	0.319829	0.386406	0.442171	0.345334	0.453562	0.383864	0.341928	0.264178	0.178836	0.235411	0.434564	0.338479	0.389772	0.351793	0.380559	0.379294	0.328462	0.512403	0.400676	0.437256	0.44871	0.489003	0.338511	0.295092	0.48754	0.0960852	0.358154	0.467104	0.225997	0.30678	0.318166	0.357398	0.305163	0.374571	0.520359	0.416889	0.0326157	0.455314	0.394068	-0.0064556	0.378953	0.470955	0.237401	0.0677578	0.512564	0.39528	0.448679
C2	0.497586	0.450092	0.372007	0.389651	0.429278	0.398631	0.437872	0.407689	0.365142	0.337531	0.258448	0.260938	0.452891	0.368633	0.42223	0.371845	0.369803	0.400513	0.384989	0.489898	0.399887	0.437005	0.473067	0.498337	0.34452	0.406432	0.506592	0.0840081	0.369471	0.474607	0.251439	0.366024	0.355936	0.39189	0.352228	0.430809	0.511375	0.441544	0.188966	0.471004	0.419773	0.178496	0.438532	0.446238	0.279359	0.192841	0.500422	0.40143	0.426078
C1	0.489002	0.438217	0.386551	0.404317	0.472925	0.387076	0.422727	0.397787	0.372445	0.323584	0.214932	0.271974	0.443336	0.362827	0.423135	0.400719	0.386113	0.403071	0.368383	0.487725	0.392971	0.418603	0.467467	0.490532	0.333357	0.321356	0.508569	0.0893627	0.36095	0.481468	0.219426	0.433966	0.344121	0.38393	0.347835	0.404913	0.484856	0.422318	0.163903	0.454334	0.378763	0.149437	0.434266	0.416997	0.298003	0.145093	0.493725	0.396672	0.427993
C2	0.489475	0.453725	0.36838	0.386109	0.426081	0.391689	0.434668	0.399259	0.371617	0.332274	0.2631	0.288279	0.455033	0.341108	0.381412	0.340006	0.361701	0.383639	0.335584	0.512354	0.405622	0.426379	0.468401	0.485727	0.33909	0.335628	0.49997	0.0706775	0.387385	0.474851	0.265433	0.2882	0.31656	0.351801	0.310164	0.411162	0.520574	0.447599	0.179989	0.460595	0.376416	0.156722	0.420814	0.491426	0.259391	0.156371	0.504902	0.386378	0.442562
C2	0.50611	0.448467	0.336609	0.370667	0.458844	0.365684	0.466607	0.389929	0.352571	0.281545	0.166406	0.260489	0.432689	0.322611	0.388566	0.363659	0.370816	0.36707	0.352832	0.50877	0.409903	0.423255	0.453783	0.494365	0.323397	0.255061	0.441363	0.060366	0.345192	0.475295	0.324346	0.37463	0.283684	0.309467	0.2724	0.391523	0.503289	0.448756	0.100851	0.440286	0.387396	0.0477539	0.409147	0.532019	0.275403	0.0967489	0.515174	0.393611	0.462861
C1	0.499783	0.441821	0.357978	0.393243	0.432014	0.390702	0.450834	0.391132	0.36148	0.303212	0.212898	0.253109	0.457507	0.349069	0.451815	0.37366	0.370309	0.402516	0.378618	0.51199	0.418075	0.423574	0.473922	0.506601	0.317887	0.296138	0.493403	0.0538465	0.355947	0.476943	0.279411	0.414898	0.299244	0.343276	0.303299	0.40854	0.515632	0.446917	0.159444	0.46419	0.383251	0.115172	0.438642	0.455841	0.265978	0.121992	0.514775	0.389765	0.447985
C1	0.493899	0.436864	0.42794	0.415337	0.436254	0.372965	0.449359	0.377641	0.345729	0.297899	0.189832	0.200168	0.438157	0.370863	0.418408	0.409313	0.375864	0.419067	0.391827	0.492438	0.417136	0.40667	0.4838	0.503033	0.348418	0.396041	0.474225	0.00174152	0.353661	0.484588	0.254376	0.373378	0.344882	0.380663	0.340062	0.428454	0.4998	0.454909	0.136123	0.471508	0.407288	0.0849134	0.448794	0.425709	0.335908	0.174912	0.520937	0.411422	0.449154
C2	0.485468	0.420387	0.347895	0.370272	0.431762	0.370097	0.446266	0.370309	0.307955	0.226084	0.0862134	0.172019	0.417619	0.354415	0.403737	0.374442	0.37666	0.361286	0.335677	0.510564	0.421774	0.426695	0.469484	0.490155	0.319232	0.272807	0.527406	0.0482462	0.327148	0.477101	0.26805	0.372699	0.311801	0.357084	0.312412	0.370186	0.491108	0.426491	-0.013704	0.451473	0.374045	-0.045517	0.402471	0.487265	0.187337	0.0216144	0.501177	0.389934	0.444023
C1	0.474243	0.388261	0.364738	0.385721	0.430383	0.377854	0.430194	0.381536	0.339214	0.313778	0.199666	0.245511	0.431497	0.373694	0.41129	0.357168	0.361869	0.390682	0.32611	0.487653	0.399399	0.406124	0.460238	0.485997	0.348814	0.312892	0.507572	-0.00195104	0.345534	0.469897	0.274712	0.373348	0.317387	0.355167	0.311783	0.426643	0.492601	0.451445	0.173021	0.445749	0.390279	0.129168	0.437352	0.474181	0.251692	0.154707	0.527233	0.384168	0.444898
C2	0.495976	0.441165	0.346584	0.427577	0.426653	0.366346	0.444019	0.37681	0.338655	0.285072	0.161101	0.213158	0.429742	0.334479	0.411046	0.385999	0.402794	0.397922	0.375888	0.493431	0.403528	0.4195	0.469545	0.500039	0.341491	0.303193	0.463716	0.0355698	0.331873	0.460252	0.321706	0.395329	0.337793	0.377118	0.338639	0.388205	0.489131	0.455916	0.0508866	0.452069	0.360706	0.00330364	0.397239	0.409077	0.26824	0.0798577	0.510403	0.39444	0.434444
C1	0.494662	0.448284	0.389066	0.407309	0.44741	0.388476	0.440111	0.399778	0.389169	0.342313	0.230752	0.297526	0.452119	0.34556	0.411301	0.405097	0.389129	0.427546	0.397161	0.494831	0.41356	0.425263	0.479891	0.503057	0.357357	0.432459	0.473779	0.0475158	0.378129	0.483795	0.310071	0.375626	0.356306	0.386588	0.352948	0.431229	0.51431	0.452066	0.173111	0.454984	0.395219	0.148141	0.452939	0.448503	0.357432	0.185934	0.515261	0.416095	0.449131
C1	0.481299	0.430698	0.378049	0.396347	0.455354	0.364124	0.448008	0.371297	0.313254	0.269997	0.180108	0.170609	0.430361	0.36764	0.384134	0.344662	0.377661	0.361425	0.327641	0.498261	0.406372	0.402966	0.45937	0.490991	0.315646	0.258562	0.481963	0.041876	0.278746	0.458999	0.245236	0.291513	0.27384	0.305572	0.261297	0.378292	0.472839	0.436923	0.1955	0.443357	0.382971	0.177971	0.408131	0.455788	0.216698	0.162217	0.518559	0.366044	0.442759
C1	0.504839	0.430369	0.409064	0.42982	0.438588	0.385314	0.450098	0.390458	0.349548	0.296396	0.197124	0.253499	0.44449	0.369088	0.424915	0.369773	0.373643	0.381181	0.360952	0.506752	0.416515	0.429864	0.475027	0.500292	0.353387	0.251021	0.513407	0.0440973	0.391134	0.470024	0.274037	0.297976	0.328622	0.368551	0.32548	0.430791	0.522239	0.442388	0.115	0.468014	0.409435	0.0777912	0.428109	0.447008	0.241671	0.0982079	0.519342	0.39641	0.447675
C2	0.498771	0.436802	0.364096	0.370496	0.438842	0.380637	0.448832	0.394429	0.372411	0.320384	0.244574	0.293035	0.463911	0.359931	0.382007	0.32628	0.383582	0.366395	0.356179	0.52833	0.424134	0.43921	0.465423	0.481964	0.319446	0.309779	0.454302	0.016549	0.389785	0.462571	0.297583	0.339336	0.273584	0.311239	0.266051	0.415514	0.525527	0.452611	0.082224	0.483324	0.398271	0.0509205	0.423689	0.480213	0.283682	0.11058	0.530722	0.402575	0.461785
C1	0.497336	0.427666	0.39298	0.40694	0.447569	0.36584	0.424454	0.39214	0.380888	0.3317	0.245443	0.29385	0.451057	0.396442	0.469309	0.407665	0.403373	0.392579	0.376023	0.489292	0.370835	0.405412	0.469969	0.50015	0.33366	0.334371	0.485041	0.0596945	0.383669	0.475367	0.298976	0.476798	0.310743	0.348577	0.311361	0.411775	0.494135	0.450373	0.135836	0.481459	0.405073	0.0994702	0.448194	0.464378	0.266896	0.137505	0.524459	0.38836	0.446303
C1	0.463519	0.393803	0.34698	0.370745	0.384415	0.33152	0.458303	0.375695	0.320581	0.319302	0.223746	0.216913	0.43691	0.366765	0.372594	0.331111	0.344825	0.373561	0.277314	0.501123	0.419669	0.435425	0.474534	0.470552	0.331681	0.264374	0.509897	-0.0341352	0.359509	0.441266	0.245156	0.253803	0.295528	0.337889	0.296505	0.405708	0.491946	0.426971	0.134476	0.441915	0.381534	0.10623	0.446926	0.458388	0.29613	0.132772	0.527435	0.385974	0.446179
C1	0.503303	0.427124	0.420376	0.407553	0.465452	0.372291	0.437435	0.403689	0.363918	0.321822	0.215705	0.258508	0.444882	0.420934	0.455489	0.413049	0.367068	0.395165	0.336178	0.497791	0.392091	0.396954	0.481143	0.500922	0.346237	0.321312	0.495963	0.0370151	0.406698	0.469215	0.28363	0.415148	0.338176	0.394108	0.342175	0.42973	0.501315	0.451485	0.168224	0.488321	0.409293	0.138524	0.455627	0.462399	0.254272	0.150595	0.513816	0.398434	0.437676
C1	0.497088	0.452029	0.401139	0.411609	0.430532	0.415832	0.439613	0.412495	0.395096	0.366981	0.303786	0.307437	0.493772	0.398713	0.409425	0.371756	0.392482	0.436747	0.40606	0.484986	0.392631	0.421962	0.473892	0.491108	0.346634	0.403937	0.483937	-0.0424861	0.421058	0.469071	0.321266	0.395833	0.323104	0.35489	0.320425	0.454897	0.53103	0.444112	0.367354	0.497803	0.451643	0.346054	0.479789	0.512865	0.310781	0.276763	0.527051	0.405677	0.439386
C1	0.4933	0.476109	0.403259	0.397952	0.443962	0.43836	0.44906	0.418618	0.386215	0.352125	0.310259	0.29966	0.517136	0.382498	0.403501	0.347179	0.419493	0.448489	0.42726	0.484723	0.376826	0.428908	0.481387	0.495216	0.323128	0.401853	0.491565	0.0204711	0.399701	0.451354	0.297084	0.391847	0.300797	0.333565	0.29213	0.478238	0.539061	0.460436	0.404769	0.499668	0.455412	0.389224	0.504121	0.500059	0.319751	0.313718	0.524742	0.398068	0.440259
C1	0.459558	0.397214	0.297856	0.387637	0.414686	0.361952	0.429416	0.373936	0.286791	0.246416	0.112313	0.185046	0.392867	0.27198	0.360686	0.413097	0.377588	0.410247	0.336067	0.478054	0.427944	0.415565	0.481767	0.461823	0.381504	0.349953	0.528758	0.0375985	0.368147	0.452455	0.216941	0.256155	0.363683	0.397969	0.357268	0.385557	0.511283	0.415551	0.0174923	0.415366	0.366565	-0.0231845	0.428902	0.379991	0.264841	0.0304446	0.520191	0.395399	0.420546
C1	0.497258	0.417906	0.408946	0.422209	0.459727	0.383692	0.430245	0.410823	0.384626	0.332123	0.240818	0.290964	0.453303	0.390465	0.436324	0.401566	0.372769	0.404016	0.357811	0.490337	0.400002	0.419077	0.482975	0.498141	0.351675	0.356615	0.507291	0.00410666	0.393687	0.485748	0.300346	0.439975	0.343212	0.390441	0.34262	0.446706	0.501946	0.462794	0.162015	0.481516	0.414135	0.13505	0.454848	0.455569	0.289422	0.166856	0.517059	0.400256	0.439821
C1	0.465877	0.40267	0.365539	0.392363	0.41257	0.354566	0.441455	0.390487	0.331269	0.323647	0.209395	0.240952	0.436525	0.362545	0.372293	0.335036	0.363922	0.401692	0.321458	0.503127	0.420773	0.422628	0.463478	0.475352	0.336951	0.283378	0.514356	0.0430429	0.35559	0.460031	0.226732	0.30235	0.334314	0.375962	0.335617	0.406705	0.493341	0.408098	0.150334	0.433407	0.370879	0.128779	0.455894	0.473734	0.256745	0.139545	0.508124	0.390045	0.441555
C2	0.499995	0.449212	0.397792	0.416503	0.451883	0.398324	0.436327	0.409192	0.385289	0.355495	0.297171	0.296519	0.485881	0.393046	0.451732	0.383061	0.390768	0.417081	0.390773	0.497431	0.388018	0.420219	0.472378	0.496977	0.331103	0.391519	0.479003	0.0297214	0.403951	0.448705	0.31916	0.442591	0.310997	0.343926	0.308348	0.466163	0.524675	0.461575	0.308162	0.496661	0.445916	0.28395	0.476077	0.491066	0.280815	0.251782	0.525609	0.405352	0.447634
C1	0.502895	0.424618	0.377701	0.410682	0.454728	0.41595	0.443753	0.3838	0.364316	0.320457	0.22651	0.251949	0.450373	0.392857	0.463657	0.394736	0.366085	0.384469	0.36701	0.492866	0.386228	0.416319	0.475978	0.50113	0.335042	0.322879	0.482231	0.0203566	0.391254	0.476032	0.299925	0.45051	0.306305	0.337445	0.308318	0.431535	0.505534	0.454276	0.185999	0.475783	0.403568	0.154752	0.449758	0.479404	0.250659	0.161275	0.524187	0.39191	0.444095
C1	0.498537	0.398994	0.396356	0.390227	0.445609	0.370034	0.44047	0.377936	0.347857	0.309216	0.207476	0.232036	0.445449	0.396055	0.477144	0.395412	0.359975	0.376751	0.372846	0.498635	0.364767	0.403289	0.467501	0.498054	0.337505	0.310601	0.471525	-0.0684864	0.374012	0.457944	0.299856	0.427585	0.310873	0.344954	0.306998	0.416333	0.50337	0.453022	0.16228	0.481432	0.409134	0.129685	0.458482	0.478486	0.223962	0.172055	0.535792	0.386807	0.438614
C1	0.491726	0.420028	0.386716	0.407368	0.448181	0.368135	0.430706	0.385622	0.357416	0.315433	0.211848	0.248389	0.435644	0.36979	0.446843	0.4077	0.362147	0.420797	0.380579	0.489087	0.412555	0.422333	0.481736	0.494583	0.359397	0.340588	0.462132	0.0066831	0.393219	0.481546	0.336751	0.479888	0.333876	0.363529	0.326539	0.411783	0.49586	0.475253	0.109481	0.470143	0.403038	0.0711421	0.44871	0.464791	0.287972	0.123409	0.533076	0.401805	0.453855
C1	0.505113	0.451993	0.425828	0.405246	0.456601	0.420236	0.436202	0.408883	0.388445	0.369087	0.307226	0.299101	0.494229	0.401948	0.447049	0.392062	0.391578	0.43198	0.402252	0.494783	0.384922	0.399054	0.473731	0.499996	0.347323	0.396867	0.490678	0.0251404	0.43115	0.482393	0.307423	0.425402	0.335832	0.367179	0.332363	0.472729	0.534107	0.474997	0.336969	0.500696	0.451445	0.311719	0.494013	0.486097	0.29829	0.274608	0.520827	0.405448	0.438821
C1	0.471416	0.418686	0.303089	0.397678	0.427327	0.362117	0.440413	0.382378	0.30857	0.245439	0.0587747	0.21952	0.377046	0.28142	0.376241	0.428429	0.376684	0.416597	0.350665	0.486814	0.432409	0.410802	0.485089	0.476931	0.38294	0.304377	0.512501	0.0218746	0.368765	0.457901	0.240616	0.290854	0.367318	0.401461	0.364562	0.385588	0.504784	0.428349	-0.0631551	0.415473	0.359919	-0.123943	0.430496	0.389788	0.288481	-0.0265035	0.525197	0.39581	0.428354
C1	0.466966	0.405581	0.299732	0.375529	0.419587	0.348787	0.435163	0.375904	0.297905	0.219946	0.0783894	0.180564	0.385446	0.263636	0.368792	0.418488	0.364922	0.4076	0.33098	0.479764	0.432857	0.424758	0.479306	0.468338	0.367663	0.311272	0.528984	0.07177	0.36648	0.452686	0.219557	0.263526	0.354435	0.399044	0.347746	0.369068	0.505232	0.400754	-0.0682229	0.398391	0.358641	-0.109152	0.424934	0.376673	0.264113	-0.00992972	0.516033	0.39371	0.420376
C1	0.482456	0.417129	0.396452	0.411615	0.432374	0.37223	0.435718	0.386184	0.327116	0.308738	0.192292	0.213206	0.43989	0.366311	0.462862	0.402687	0.370144	0.410614	0.34944	0.48642	0.394725	0.395607	0.476094	0.494003	0.348878	0.333121	0.514243	0.0378818	0.415674	0.461419	0.25167	0.377497	0.348039	0.392322	0.343559	0.418145	0.510602	0.460969	0.09091	0.469052	0.407247	0.0472375	0.459489	0.437396	0.280467	0.108213	0.524045	0.396993	0.427143
C1	0.473495	0.407769	0.352167	0.408435	0.423901	0.371806	0.440994	0.397931	0.329725	0.293395	0.156693	0.239578	0.394052	0.348013	0.390601	0.425664	0.372464	0.422849	0.35579	0.485399	0.426515	0.42507	0.479134	0.480898	0.374044	0.34372	0.516378	0.0464022	0.369287	0.467	0.224102	0.231183	0.377571	0.411647	0.377207	0.414344	0.508813	0.416359	-0.0100807	0.429097	0.377783	-0.0672437	0.459195	0.4298	0.303629	0.0387607	0.519084	0.400256	0.432649
C1	0.486139	0.43365	0.410053	0.42669	0.435796	0.424633	0.431813	0.419252	0.378495	0.35137	0.265767	0.302437	0.458279	0.39309	0.454013	0.414709	0.364018	0.428398	0.377783	0.48321	0.415799	0.399032	0.477249	0.493818	0.375849	0.418647	0.515592	0.0840569	0.432718	0.471413	0.261424	0.380229	0.383468	0.420671	0.378015	0.462248	0.514444	0.466653	0.248857	0.478907	0.442528	0.222201	0.473256	0.449887	0.30968	0.223812	0.506215	0.416307	0.436146
C1	0.499337	0.431833	0.405037	0.417968	0.437895	0.40968	0.439831	0.411705	0.38933	0.359313	0.305592	0.297237	0.47513	0.393727	0.433591	0.375846	0.395222	0.434625	0.395912	0.499811	0.391659	0.41027	0.475775	0.493254	0.351671	0.409742	0.490439	0.0383604	0.416143	0.486412	0.305261	0.41062	0.326268	0.361745	0.323514	0.463965	0.525571	0.469697	0.308711	0.494612	0.435074	0.28931	0.483046	0.489196	0.316131	0.269671	0.530326	0.413854	0.448561
C1	0.505639	0.43478	0.412575	0.427531	0.460941	0.40905	0.456516	0.396262	0.363805	0.320672	0.228886	0.245988	0.460539	0.380362	0.462652	0.39628	0.385268	0.409261	0.385325	0.512827	0.392722	0.428621	0.479786	0.505457	0.346931	0.307582	0.504176	0.0602903	0.384872	0.475078	0.28907	0.42073	0.331992	0.369245	0.32878	0.421176	0.510976	0.471659	0.152251	0.49234	0.413108	0.122551	0.469592	0.484213	0.27448	0.157391	0.526477	0.398162	0.448884
C1	0.490278	0.446453	0.406947	0.39851	0.434849	0.426952	0.43171	0.41014	0.386214	0.370029	0.298247	0.306041	0.489489	0.379777	0.431017	0.368084	0.417438	0.437575	0.408582	0.482781	0.375892	0.402068	0.472582	0.489599	0.347731	0.427516	0.488479	0.0127393	0.411756	0.47206	0.303562	0.375596	0.323823	0.345079	0.311438	0.473358	0.529862	0.442939	0.31215	0.501616	0.445383	0.290157	0.494857	0.518229	0.315395	0.262879	0.534015	0.405283	0.444389
C1	0.464802	0.421286	0.315336	0.375107	0.408096	0.377442	0.433668	0.391532	0.319887	0.290766	0.175335	0.240259	0.417161	0.29276	0.374215	0.409992	0.374465	0.427648	0.350942	0.472191	0.41153	0.408719	0.47828	0.471794	0.370865	0.380273	0.517529	0.0268264	0.387816	0.463078	0.200885	0.233167	0.36256	0.400712	0.354408	0.400833	0.512718	0.426816	0.115017	0.432224	0.379425	0.0844132	0.441943	0.397708	0.266198	0.102708	0.519539	0.402363	0.422858
C1	0.497092	0.421565	0.384471	0.40126	0.447587	0.379826	0.434661	0.396257	0.382965	0.335828	0.25534	0.289269	0.438895	0.377721	0.462418	0.41231	0.379562	0.416399	0.379638	0.49587	0.393442	0.405683	0.482067	0.499906	0.346985	0.331196	0.469798	0.00440752	0.396671	0.470938	0.314654	0.48656	0.320475	0.346939	0.319093	0.432955	0.500243	0.4587	0.143208	0.475671	0.39988	0.115382	0.457908	0.46103	0.283106	0.174262	0.528971	0.403526	0.450491
C2	0.495651	0.407432	0.401017	0.381131	0.410898	0.393232	0.458429	0.373498	0.353165	0.312934	0.243715	0.235547	0.452762	0.377054	0.444392	0.392454	0.40233	0.407996	0.381652	0.4889	0.387402	0.428043	0.491592	0.481499	0.337413	0.340376	0.436867	-0.0428438	0.375314	0.451753	0.323854	0.36883	0.306451	0.334091	0.291858	0.436762	0.506413	0.471268	0.238693	0.471194	0.404404	0.187591	0.48355	0.480868	0.307242	0.230686	0.533502	0.401862	0.448983
C1	0.4948	0.457816	0.406408	0.39573	0.439053	0.416869	0.436388	0.413284	0.384077	0.348783	0.284891	0.288215	0.505182	0.377015	0.401305	0.343098	0.397713	0.439849	0.405398	0.485736	0.377748	0.421797	0.465494	0.487866	0.319315	0.406282	0.495124	0.0679741	0.40419	0.472749	0.301314	0.398882	0.302478	0.339246	0.300732	0.463132	0.544306	0.467191	0.335636	0.492782	0.446819	0.314341	0.486995	0.490976	0.300664	0.265714	0.52025	0.402215	0.439129
C1	0.463416	0.406176	0.294995	0.375831	0.408062	0.356457	0.436402	0.376687	0.305601	0.230271	0.0890405	0.206254	0.381313	0.269863	0.370295	0.414692	0.382839	0.409755	0.358222	0.478763	0.43487	0.42194	0.479957	0.466929	0.389738	0.329301	0.515533	0.0129725	0.372102	0.457625	0.225637	0.262807	0.364404	0.396562	0.355011	0.371312	0.501626	0.41159	0.00418759	0.392874	0.338281	-0.0329279	0.427287	0.380608	0.266028	0.0180055	0.526049	0.399765	0.426748
C1	0.468723	0.433394	0.37999	0.392592	0.426801	0.370409	0.4322	0.399319	0.343956	0.32073	0.231736	0.260262	0.459945	0.347972	0.401464	0.404847	0.39756	0.436113	0.388624	0.463062	0.417964	0.415726	0.485374	0.480083	0.369693	0.416066	0.52009	0.0101696	0.420984	0.473658	0.237204	0.289337	0.361518	0.401751	0.346439	0.435708	0.518598	0.451204	0.237187	0.455724	0.424276	0.208695	0.464335	0.427584	0.293539	0.191178	0.518795	0.406006	0.431522
C1	0.459634	0.400005	0.366179	0.388738	0.379648	0.346149	0.443801	0.384828	0.339552	0.334706	0.233444	0.257788	0.439525	0.354589	0.377958	0.318687	0.368256	0.395249	0.307694	0.501283	0.418326	0.423938	0.461319	0.47826	0.329446	0.27412	0.520162	0.0653093	0.35977	0.460312	0.237011	0.245862	0.321194	0.352195	0.316579	0.398749	0.490504	0.417212	0.170172	0.444181	0.370042	0.148296	0.449104	0.476084	0.257649	0.154675	0.515593	0.378987	0.439042
C1	0.465444	0.405937	0.257798	0.397326	0.405763	0.336853	0.434018	0.358021	0.272983	0.204494	0.00949627	0.153903	0.374411	0.232755	0.344195	0.405211	0.367239	0.3824	0.310808	0.480051	0.42272	0.40058	0.469825	0.460069	0.361938	0.29642	0.518037	0.0141391	0.320288	0.447818	0.21172	0.238643	0.342381	0.38756	0.338272	0.360862	0.493169	0.399944	-0.0261352	0.373937	0.349579	-0.0663359	0.420552	0.368888	0.274959	-0.00630228	0.518189	0.387614	0.417396
C1	0.470627	0.392067	0.364986	0.393835	0.417423	0.344483	0.449656	0.393441	0.342002	0.336162	0.226043	0.255039	0.434278	0.379835	0.384068	0.349009	0.358755	0.392046	0.324018	0.50659	0.421904	0.422374	0.474297	0.478262	0.338876	0.285692	0.515243	0.0357395	0.371238	0.457102	0.269046	0.310397	0.31742	0.357308	0.31998	0.408817	0.499603	0.408237	0.127667	0.453562	0.370063	0.0919854	0.454269	0.481252	0.273383	0.135329	0.521165	0.386879	0.446356
C1	0.477044	0.421698	0.406919	0.417922	0.461721	0.349624	0.445843	0.392477	0.359191	0.347341	0.222738	0.266956	0.446153	0.379434	0.412743	0.378465	0.370999	0.409112	0.359639	0.486008	0.40404	0.404675	0.465118	0.492403	0.346737	0.346911	0.529339	0.0195166	0.368265	0.470439	0.275247	0.316337	0.328534	0.367564	0.326897	0.412977	0.497778	0.427155	0.149738	0.451528	0.386847	0.123706	0.441568	0.488109	0.279357	0.156902	0.522034	0.393657	0.447026
C1	0.501506	0.433542	0.425575	0.415388	0.45387	0.410311	0.446568	0.411767	0.390202	0.341574	0.260708	0.296253	0.458775	0.412994	0.449252	0.402399	0.407533	0.417408	0.376832	0.501302	0.412056	0.429475	0.484725	0.501799	0.356218	0.353828	0.496224	0.046087	0.39951	0.47714	0.299368	0.411855	0.345605	0.394854	0.347385	0.447997	0.507309	0.471256	0.229483	0.487846	0.409946	0.203593	0.465351	0.46557	0.286555	0.200903	0.518855	0.412842	0.452896
[truncated: 137 more columns]

## Sheet: Sheet4
C1	C2	C2	C1	C1	C1	C1	C2	C2	C2	C1	C2	C1	C2	C2	C1	C2	C1	C2	C2	C1	C2	C2	C2	C2	C2	C1	C2	C1	C2	C1	C2	C2	C1	C2	C1	C2	C1	C1	C1	C1	C2	C1	C2	C2	C1	C1	C1	C2	C1
0.499405	0.505901	0.491637	0.496858	0.489477	0.47007	0.468236	0.493853	0.500848	0.505399	0.489294	0.489271	0.485182	0.486769	0.481239	0.479181	0.500508	0.4977	0.501043	0.487033	0.493954	0.500069	0.513181	0.48677	0.501727	0.518917	0.492425	0.496283	0.494869	0.487759	0.478666	0.49855	0.482588	0.4963	0.497353	0.497352	0.50217	0.501721	0.486202	0.468134	0.509637	0.494826	0.496517	0.49243	0.492886	0.496447	0.493276	0.471271	0.491129	0.498806
0.457804	0.447403	0.474121	0.426028	0.445923	0.402616	0.400522	0.434444	0.454785	0.443328	0.435895	0.449675	0.457248	0.409646	0.427247	0.399051	0.464611	0.424681	0.442667	0.447538	0.43431	0.433662	0.437957	0.451926	0.440255	0.431928	0.459324	0.431551	0.43763	0.44386	0.455559	0.459313	0.464776	0.430667	0.428001	0.435333	0.47275	0.454156	0.421947	0.445631	0.433305	0.452775	0.398991	0.454541	0.441106	0.432239	0.459138	0.416617	0.422795	0.433348
0.389578	0.300963	0.311822	0.334158	0.36907	0.335812	0.373418	0.336813	0.394496	0.355384	0.409374	0.366951	0.396877	0.329023	0.31097	0.3123	0.373033	0.376981	0.315544	0.382651	0.364124	0.357106	0.368005	0.301724	0.319932	0.376622	0.364411	0.335496	0.396534	0.347867	0.381569	0.34837	0.339107	0.365867	0.345498	0.378549	0.371655	0.367439	0.334307	0.317267	0.401252	0.36787	0.363334	0.35115	0.415513	0.344303	0.407471	0.330157	0.339107	0.371137
0.437179	0.38077	0.374424	0.405793	0.383738	0.363686	0.421565	0.383405	0.42786	0.384013	0.377701	0.391946	0.418831	0.359254	0.377386	0.358828	0.406066	0.438896	0.406959	0.399503	0.401037	0.415967	0.423641	0.391908	0.36303	0.366271	0.37747	0.338842	0.391591	0.387429	0.39362	0.400439	0.369315	0.387031	0.390435	0.411198	0.400243	0.399686	0.388923	0.414886	0.427742	0.378297	0.398497	0.4094	0.399526	0.372447	0.415769	0.360305	0.377365	0.423044
0.497213	0.417562	0.43908	0.460903	0.464139	0.417646	0.45432	0.41772	0.466398	0.44188	0.430633	0.458624	0.472221	0.403576	0.425397	0.432711	0.430959	0.482697	0.431288	0.443603	0.43694	0.418174	0.455523	0.447122	0.405707	0.410535	0.466374	0.418759	0.471955	0.423795	0.427165	0.448116	0.471641	0.481018	0.391217	0.462217	0.454605	0.461463	0.43052	0.376268	0.471315	0.466901	0.418557	0.448836	0.468271	0.446833	0.49668	0.418862	0.454378	0.464999
0.381387	0.365422	0.377094	0.377779	0.387403	0.341953	0.358535	0.329895	0.416125	0.392216	0.381581	0.363874	0.371917	0.363743	0.373367	0.378804	0.358465	0.38544	0.347616	0.388538	0.389587	0.393542	0.374898	0.337966	0.351443	0.398212	0.376369	0.37725	0.390664	0.370035	0.402842	0.356883	0.375911	0.385461	0.391379	0.385297	0.398447	0.378295	0.355977	0.344672	0.372369	0.3767	0.387346	0.381151	0.384834	0.378292	0.367062	0.338014	0.385344	0.364436
0.441543	0.483035	0.449258	0.455752	0.441943	0.435229	0.437511	0.440017	0.439113	0.444342	0.450833	0.44824	0.42362	0.433986	0.436039	0.441311	0.452307	0.449272	0.467903	0.43223	0.441846	0.456099	0.446685	0.443299	0.466023	0.490871	0.441257	0.446732	0.430904	0.417565	0.442662	0.437328	0.458288	0.457683	0.467009	0.432809	0.456587	0.449794	0.448559	0.437787	0.454638	0.444376	0.449688	0.453267	0.438019	0.459933	0.430895	0.428789	0.4493	0.438325
0.399902	0.359231	0.378592	0.390566	0.40797	0.368651	0.382832	0.365786	0.410005	0.400957	0.374792	0.377304	0.388387	0.364488	0.386282	0.344163	0.390376	0.387103	0.374849	0.39976	0.395291	0.385136	0.386778	0.36198	0.370091	0.357968	0.38092	0.387366	0.394029	0.380932	0.38363	0.378229	0.387895	0.38387	0.377791	0.39277	0.391256	0.371912	0.383227	0.368836	0.387263	0.401082	0.38908	0.392741	0.409101	0.387227	0.385014	0.37004	0.384889	0.385039
0.381624	0.318054	0.308102	0.335947	0.381231	0.301642	0.355167	0.320661	0.382478	0.34725	0.325796	0.345696	0.344342	0.318364	0.354807	0.293486	0.34292	0.360736	0.318302	0.372447	0.348223	0.349597	0.330981	0.288789	0.300847	0.29945	0.322478	0.352079	0.355739	0.351194	0.364668	0.340735	0.343279	0.342125	0.333299	0.350076	0.359731	0.311144	0.335873	0.314443	0.360054	0.35658	0.335912	0.34903	0.394614	0.327703	0.352566	0.311573	0.320931	0.339426
0.3366	0.24324	0.235119	0.294652	0.342591	0.254786	0.325902	0.249797	0.335012	0.307716	0.28211	0.290723	0.296884	0.27203	0.279145	0.203607	0.291015	0.327031	0.260681	0.329896	0.304647	0.30673	0.295668	0.187427	0.260814	0.246055	0.302397	0.293405	0.298333	0.310743	0.307502	0.265006	0.283726	0.292635	0.291173	0.295856	0.294577	0.256752	0.266933	0.270035	0.30561	0.313979	0.281848	0.28595	0.331212	0.270341	0.292269	0.241647	0.266492	0.274719
0.24952	0.0992263	0.0989238	0.220585	0.251302	0.124828	0.189388	0.179713	0.242139	0.200184	0.181853	0.175586	0.182658	0.15719	0.237975	0.0591462	0.21149	0.221675	0.133454	0.261265	0.148046	0.212153	0.121239	0.0551632	0.152452	0.152122	0.195789	0.165784	0.166486	0.173344	0.260094	0.148483	0.20751	0.207	0.20295	0.181214	0.20712	0.147064	0.159676	0.18645	0.203965	0.219036	0.209585	0.184913	0.267149	0.146307	0.177695	0.144549	0.142119	0.153701
0.298124	0.213723	0.179024	0.23518	0.296007	0.190693	0.250978	0.197056	0.26331	0.243497	0.170598	0.21839	0.223126	0.189218	0.230132	0.172383	0.238676	0.2604	0.235478	0.266127	0.237876	0.23749	0.222029	0.155057	0.183044	0.158324	0.220045	0.25076	0.247201	0.25774	0.273721	0.215029	0.23197	0.22544	0.223639	0.241954	0.241306	0.170986	0.219802	0.205405	0.257456	0.258309	0.226891	0.22975	0.290263	0.208859	0.241392	0.190318	0.182504	0.224095
0.462598	0.448794	0.446093	0.440094	0.457022	0.389304	0.435873	0.438155	0.464704	0.466943	0.444155	0.450289	0.441316	0.419789	0.430309	0.393983	0.458486	0.445232	0.419823	0.478878	0.445567	0.454303	0.437183	0.40775	0.421949	0.436826	0.440761	0.433186	0.448983	0.432811	0.44319	0.459264	0.466625	0.443559	0.433389	0.442627	0.470614	0.457619	0.447945	0.428126	0.444403	0.451167	0.434534	0.463777	0.464063	0.44389	0.443923	0.430961	0.437979	0.437739
0.374987	0.316947	0.347287	0.369463	0.35621	0.320334	0.358486	0.290366	0.379974	0.318008	0.386541	0.363643	0.383043	0.360475	0.294708	0.310102	0.352952	0.366822	0.327282	0.370162	0.367005	0.361023	0.382295	0.312534	0.323866	0.304641	0.368376	0.32852	0.357364	0.335291	0.356502	0.329546	0.359038	0.378658	0.341649	0.361114	0.372458	0.408014	0.313027	0.309646	0.389728	0.36474	0.375565	0.357921	0.370686	0.34512	0.36414	0.329224	0.330121	0.328089
0.448124	0.353337	0.425945	0.391014	0.408421	0.3905	0.406673	0.371132	0.467515	0.403089	0.473678	0.438073	0.449334	0.394999	0.33348	0.361365	0.36881	0.442767	0.384969	0.425834	0.434782	0.414547	0.449587	0.373133	0.375384	0.388853	0.42579	0.395348	0.418311	0.404205	0.414827	0.43604	0.402064	0.415373	0.38732	0.431658	0.418016	0.432376	0.363323	0.342202	0.446222	0.389466	0.389409	0.402394	0.426502	0.405246	0.398453	0.377156	0.427059	0.408863
0.39537	0.361172	0.35608	0.335849	0.377267	0.396463	0.341584	0.347745	0.414905	0.372786	0.386749	0.373419	0.40617	0.338758	0.309255	0.359094	0.347294	0.40407	0.369738	0.371019	0.414255	0.343364	0.394702	0.37264	0.333702	0.396564	0.374912	0.364954	0.397287	0.387277	0.356389	0.400854	0.324822	0.367368	0.328818	0.427211	0.372776	0.37869	0.354909	0.334873	0.401773	0.367177	0.333344	0.367072	0.358302	0.356092	0.381979	0.351375	0.382554	0.402881
0.366826	0.36704	0.365546	0.370074	0.376301	0.374061	0.363454	0.385409	0.376329	0.385469	0.37954	0.400045	0.375738	0.388669	0.380359	0.373066	0.382233	0.386034	0.366802	0.386255	0.391278	0.383347	0.400652	0.37877	0.437925	0.406004	0.379281	0.363777	0.390995	0.361142	0.360717	0.377652	0.396479	0.371581	0.377645	0.390015	0.379081	0.381664	0.398099	0.351015	0.392871	0.396702	0.378551	0.358424	0.385284	0.38135	0.369649	0.401614	0.395783	0.394326
0.382021	0.350888	0.378791	0.361658	0.401359	0.395629	0.380351	0.356185	0.38627	0.398469	0.387598	0.389504	0.386275	0.380234	0.371108	0.309769	0.366549	0.394421	0.363586	0.413036	0.41005	0.39049	0.411682	0.360458	0.395348	0.419435	0.369084	0.365217	0.409059	0.368775	0.354333	0.394131	0.380456	0.390855	0.383219	0.412572	0.388659	0.36136	0.38675	0.364268	0.398554	0.378966	0.340324	0.371758	0.39116	0.389392	0.377752	0.353741	0.399948	0.399673
0.356597	0.335753	0.305484	0.360196	0.38308	0.329946	0.324293	0.360213	0.359387	0.379142	0.362795	0.362734	0.368355	0.353058	0.361641	0.320189	0.363416	0.378841	0.325715	0.400403	0.36624	0.354938	0.412209	0.306587	0.373265	0.33983	0.364969	0.329305	0.378272	0.338847	0.338177	0.371314	0.38579	0.365716	0.362793	0.356325	0.393091	0.352742	0.369887	0.361653	0.373789	0.348516	0.339102	0.345893	0.356437	0.376491	0.354431	0.363005	0.366515	0.363467
0.49251	0.521721	0.504152	0.524324	0.489006	0.485751	0.479008	0.531494	0.501635	0.488407	0.504328	0.495769	0.489629	0.495137	0.513292	0.52054	0.513998	0.486605	0.50879	0.494536	0.493264	0.515278	0.496081	0.508451	0.497862	0.510457	0.497412	0.498443	0.507506	0.474702	0.479441	0.496031	0.49109	0.50599	0.526157	0.490572	0.523413	0.51795	0.5134	0.502478	0.51389	0.511368	0.506597	0.501128	0.500666	0.526558	0.49479	0.505444	0.506349	0.49786
0.401504	0.423409	0.409583	0.417448	0.401659	0.429092	0.405769	0.424916	0.415481	0.406781	0.4165	0.407282	0.406274	0.403455	0.42972	0.42705	0.418508	0.408714	0.408654	0.402521	0.420487	0.399262	0.393319	0.431257	0.406522	0.407789	0.413015	0.413636	0.416225	0.392524	0.405836	0.399327	0.400891	0.41252	0.442549	0.402451	0.43346	0.415058	0.418658	0.419396	0.408124	0.412215	0.427515	0.416251	0.395207	0.417016	0.406862	0.419644	0.403718	0.399636
0.414751	0.433571	0.428874	0.44675	0.41298	0.420072	0.40145	0.450151	0.418	0.424412	0.428486	0.4217	0.42065	0.436045	0.459761	0.414041	0.442416	0.416146	0.416202	0.434042	0.431374	0.430452	0.415402	0.468894	0.431544	0.415316	0.421317	0.426441	0.418501	0.410336	0.406932	0.428886	0.439967	0.43559	0.439199	0.398845	0.43638	0.427278	0.428136	0.430648	0.440541	0.435956	0.436287	0.440209	0.429739	0.435269	0.40422	0.426351	0.441074	0.417921
0.470523	0.451139	0.453545	0.462192	0.471584	0.479855	0.465499	0.463486	0.468389	0.456814	0.486237	0.465718	0.475527	0.473441	0.47715	0.43422	0.482468	0.463879	0.457456	0.47789	0.474758	0.436666	0.471993	0.471971	0.46788	0.487508	0.469842	0.467933	0.463812	0.465594	0.459859	0.473859	0.457901	0.477182	0.478627	0.466553	0.474285	0.472495	0.473496	0.466099	0.476251	0.467213	0.462038	0.484249	0.475822	0.459343	0.464706	0.476526	0.469963	0.47247
0.508166	0.490792	0.483525	0.481668	0.504582	0.478457	0.483412	0.492617	0.507642	0.492662	0.502896	0.499983	0.502612	0.48337	0.488995	0.475785	0.493651	0.506802	0.484238	0.501383	0.50703	0.48468	0.507805	0.479772	0.47145	0.493706	0.506302	0.484575	0.489901	0.487715	0.488539	0.503872	0.482529	0.491513	0.48467	0.502266	0.498426	0.500917	0.489824	0.4896	0.508927	0.483663	0.478403	0.514884	0.490242	0.495123	0.491174	0.48346	0.492567	0.498376
0.337864	0.309873	0.313668	0.315315	0.351821	0.376718	0.359128	0.29581	0.359414	0.33375	0.340965	0.331273	0.322092	0.331917	0.314167	0.324584	0.312673	0.349601	0.325021	0.326173	0.371076	0.32369	0.373118	0.30468	0.356453	0.342362	0.330309	0.354395	0.350049	0.31446	0.343692	0.327184	0.313369	0.337565	0.305346	0.361392	0.325812	0.323232	0.328788	0.322528	0.342381	0.309418	0.328128	0.309281	0.3199	0.321579	0.326988	0.332272	0.320526	0.347124
0.337173	0.178573	0.2768	0.266718	0.398614	0.328118	0.285227	0.274716	0.344775	0.313045	0.312285	0.303792	0.257337	0.307024	0.257773	0.241939	0.276466	0.316687	0.275621	0.365147	0.385695	0.293205	0.334283	0.204076	0.344936	0.306565	0.27908	0.288361	0.378959	0.308571	0.246633	0.289665	0.268532	0.300333	0.300001	0.35934	0.323306	0.274297	0.331293	0.283674	0.35316	0.279018	0.276058	0.283255	0.301773	0.301219	0.32082	0.242383	0.244443	0.33486
0.492409	0.471438	0.4933	0.468169	0.485192	0.510379	0.496371	0.467277	0.471885	0.50108	0.494471	0.498886	0.481528	0.466379	0.487668	0.441489	0.503955	0.513188	0.472642	0.478824	0.506265	0.457554	0.471986	0.498151	0.449746	0.477772	0.526114	0.519885	0.504886	0.494607	0.504399	0.499769	0.517559	0.46473	0.458564	0.492891	0.463696	0.484303	0.481602	0.491557	0.459473	0.498929	0.507328	0.498528	0.509223	0.481236	0.48347	0.448536	0.492237	0.505833
0.0399985	0.0636518	0.0510108	0.0222941	0.0451041	0.0448719	0.0306234	0.0149625	0.0825135	0.0430562	0.0472306	0.0743648	0.0382148	0.0431126	0.0454386	-0.006389	0.0516365	0.0282122	0.0236262	0.0426645	-8.12277e-05	0.0289513	0.0225843	0.00976579	0.0952499	-0.0225566	0.0740112	0.0775691	0.0688505	0.0849527	-0.00258462	0.0590716	0.0678664	0.0647468	0.0137806	0.0339046	0.0269226	0.00603258	0.00533524	0.0363963	0.0584264	0.0755245	0.0227421	0.0674265	0.0674763	0.0556924	0.0913943	-0.0284255	0.0619616	0.0347124
0.392807	0.351179	0.348193	0.358794	0.377099	0.350831	0.331216	0.297932	0.395666	0.379302	0.357685	0.337568	0.305695	0.321157	0.323177	0.298483	0.350046	0.38699	0.349893	0.394465	0.395404	0.362765	0.381189	0.276898	0.394267	0.395236	0.362619	0.392991	0.345819	0.315593	0.368514	0.34463	0.295978	0.373276	0.355832	0.390021	0.37181	0.361844	0.355854	0.340555	0.381628	0.330924	0.343333	0.297107	0.370323	0.374628	0.315562	0.290722	0.371786	0.375077
0.475704	0.436938	0.464698	0.469123	0.473861	0.471661	0.469854	0.461551	0.494534	0.47364	0.476925	0.486537	0.482753	0.460019	0.480494	0.468965	0.453543	0.469445	0.481106	0.485493	0.502606	0.471648	0.479938	0.462428	0.472529	0.460803	0.471312	0.469224	0.481375	0.467739	0.459982	0.47455	0.467262	0.476566	0.467951	0.484	0.487408	0.465446	0.476148	0.470678	0.488739	0.477357	0.460285	0.462233	0.473931	0.487805	0.466772	0.465552	0.479893	0.462367
0.309546	0.203572	0.281813	0.30652	0.266946	0.218844	0.31682	0.301283	0.353572	0.24131	0.266578	0.314791	0.23604	0.239553	0.275002	0.27533	0.285516	0.279466	0.285608	0.318557	0.298664	0.303645	0.370769	0.250212	0.245393	0.226707	0.245353	0.27974	0.274853	0.25698	0.306451	0.293567	0.275225	0.311339	0.282749	0.30398	0.292304	0.285349	0.287593	0.262741	0.313196	0.288459	0.311931	0.294259	0.244379	0.350153	0.286126	0.319886	0.288825	0.259067
0.427097	0.21061	0.280852	0.318355	0.328971	0.34069	0.315383	0.390205	0.423165	0.345498	0.352205	0.435316	0.300574	0.346845	0.318688	0.234293	0.290575	0.354541	0.30998	0.473726	0.379803	0.337306	0.33662	0.278135	0.29038	0.251099	0.318261	0.295044	0.332625	0.459976	0.285872	0.450881	0.31228	0.415757	0.361908	0.401242	0.339586	0.35334	0.320714	0.324477	0.401658	0.310868	0.338867	0.378224	0.35714	0.397138	0.38601	0.322221	0.431165	0.401841
0.321257	0.276552	0.298431	0.279538	0.350059	0.375048	0.333386	0.259302	0.335659	0.335828	0.333828	0.327997	0.319375	0.299493	0.273495	0.268	0.27791	0.341486	0.28667	0.296923	0.360566	0.27215	0.35655	0.286208	0.301258	0.305292	0.30948	0.325938	0.354422	0.302582	0.296335	0.328728	0.26097	0.313085	0.277147	0.362039	0.303594	0.316405	0.312186	0.29284	0.334894	0.287948	0.293096	0.271495	0.31148	0.300666	0.32044	0.295472	0.300622	0.353555
0.362897	0.333454	0.338518	0.318958	0.384881	0.40781	0.367201	0.307749	0.37048	0.36713	0.368223	0.372142	0.358197	0.337643	0.313633	0.308708	0.312744	0.369598	0.328662	0.333472	0.405614	0.305349	0.39029	0.332868	0.342355	0.355509	0.336271	0.362859	0.391763	0.35079	0.311298	0.372112	0.293521	0.341047	0.316411	0.396627	0.338623	0.340838	0.37035	0.326465	0.357605	0.326276	0.331379	0.30569	0.351421	0.344418	0.350159	0.327982	0.342251	0.388314
0.324958	0.270999	0.298006	0.276653	0.347481	0.37009	0.33288	0.266293	0.331846	0.330274	0.329614	0.331842	0.311433	0.302451	0.266817	0.256837	0.278275	0.338335	0.280272	0.292406	0.359362	0.264442	0.3588	0.28088	0.301227	0.303949	0.299401	0.32167	0.353156	0.308211	0.286185	0.340493	0.247315	0.314161	0.264068	0.363149	0.296068	0.298063	0.30772	0.286286	0.323261	0.289103	0.290899	0.271412	0.307716	0.3037	0.318452	0.295124	0.300647	0.357047
0.43282	0.393259	0.385281	0.402693	0.426997	0.390124	0.401848	0.377129	0.42749	0.380927	0.413283	0.412038	0.395647	0.401346	0.412315	0.36027	0.406263	0.40693	0.37624	0.444624	0.403833	0.42636	0.404653	0.338549	0.387392	0.410063	0.419016	0.412107	0.411024	0.400215	0.413074	0.397427	0.404287	0.408345	0.419106	0.421461	0.42574	0.411501	0.385899	0.39837	0.421216	0.413263	0.395179	0.397571	0.442837	0.414844	0.395629	0.373658	0.412295	0.405057
0.514879	0.524096	0.498915	0.521214	0.518621	0.498405	0.467816	0.491382	0.516067	0.512573	0.489427	0.470786	0.486403	0.485157	0.501895	0.514056	0.504351	0.500764	0.490804	0.521389	0.494467	0.526109	0.505205	0.466129	0.506809	0.519509	0.508096	0.507991	0.510962	0.47544	0.495703	0.48331	0.495657	0.490186	0.52873	0.503248	0.532929	0.500329	0.49754	0.499213	0.503768	0.506868	0.500815	0.503498	0.512227	0.53254	0.495609	0.47194	0.502309	0.490026
0.449378	0.445422	0.425954	0.461611	0.435779	0.410938	0.429032	0.415461	0.486405	0.445584	0.433195	0.448768	0.44142	0.436405	0.441478	0.441043	0.456431	0.451347	0.43927	0.456196	0.435276	0.463528	0.457178	0.407453	0.44046	0.453748	0.454694	0.454201	0.440451	0.431665	0.441112	0.423193	0.450959	0.44817	0.454811	0.459373	0.458303	0.462641	0.440873	0.461534	0.433313	0.449299	0.454395	0.445319	0.455961	0.438568	0.433896	0.407171	0.462332	0.447565
0.133233	0.0270629	0.208185	0.184887	0.162729	0.0342991	0.18786	0.0990281	0.332382	0.148965	0.14601	0.129515	0.164309	0.0874332	0.186921	0.0498527	0.185043	0.236477	0.0205523	0.260947	0.205346	0.268606	0.154284	-0.0572702	0.179344	0.158346	0.170562	0.0809506	0.152408	0.120409	0.153615	0.0573095	0.186712	0.181855	0.207064	0.120994	0.184958	0.147255	0.0262587	0.180954	0.102054	0.221013	0.179767	0.228749	0.221259	0.194142	0.215707	-0.0167862	0.154487	0.144087
0.468747	0.447161	0.424738	0.487678	0.472725	0.411231	0.424903	0.447161	0.473601	0.433078	0.462586	0.451971	0.460814	0.430109	0.470291	0.429442	0.460364	0.46128	0.437688	0.479153	0.456972	0.472514	0.473796	0.420659	0.42256	0.465485	0.465665	0.438427	0.437323	0.42444	0.457814	0.448949	0.447849	0.469446	0.47202	0.4648	0.497622	0.47368	0.444733	0.467906	0.468545	0.471187	0.476012	0.467555	0.481182	0.461186	0.465869	0.427785	0.482714	0.453865
0.410125	0.385696	0.348599	0.390606	0.394625	0.352189	0.37308	0.401814	0.414842	0.373977	0.383564	0.376859	0.398835	0.355486	0.378151	0.390539	0.379191	0.37827	0.365977	0.415303	0.396274	0.409349	0.414465	0.374897	0.383678	0.372623	0.394972	0.392034	0.379545	0.35721	0.385705	0.374631	0.377439	0.384266	0.390197	0.377378	0.424816	0.403852	0.370005	0.384445	0.411298	0.372945	0.376681	0.399994	0.402627	0.395792	0.395268	0.379614	0.392337	0.383487
0.103819	-0.0238496	0.18572	0.152008	0.132396	0.00657143	0.184611	0.0341715	0.319314	0.120219	0.100317	0.0931315	0.159259	0.0362127	0.161439	-0.000484987	0.158853	0.216979	-0.0334628	0.230921	0.175217	0.233384	0.115771	-0.117781	0.145371	0.116469	0.139195	0.0551341	0.129836	0.108229	0.1247	0.0131706	0.168033	0.154432	0.164943	0.0720294	0.145271	0.0875034	-0.012749	0.153815	0.0525876	0.207529	0.138945	0.203844	0.200824	0.15609	0.181772	-0.0522466	0.115554	0.107181
0.433079	0.406333	0.411711	0.407996	0.444649	0.425149	0.413894	0.401707	0.42775	0.395623	0.426184	0.437612	0.389498	0.433215	0.415478	0.366235	0.419601	0.423884	0.395339	0.463003	0.410955	0.439252	0.421252	0.344458	0.382065	0.437805	0.442837	0.405186	0.422855	0.437526	0.424384	0.419552	0.421216	0.430395	0.427651	0.42973	0.435196	0.422298	0.391882	0.394141	0.426078	0.421958	0.407712	0.413647	0.465064	0.433688	0.411899	0.390725	0.405857	0.429119
0.477098	0.464863	0.47418	0.463782	0.463853	0.360964	0.452566	0.453997	0.468054	0.49132	0.443975	0.451865	0.426384	0.413567	0.407992	0.502146	0.468923	0.480613	0.488325	0.445902	0.433323	0.483546	0.494218	0.471016	0.531079	0.481326	0.461225	0.503734	0.435354	0.412666	0.448831	0.433559	0.477111	0.487334	0.507212	0.429145	0.48435	0.463182	0.450505	0.442205	0.454304	0.512375	0.425518	0.466823	0.47123	0.472094	0.448411	0.419423	0.444541	0.428622
0.290036	0.220893	0.256181	0.176272	0.295126	0.26483	0.245942	0.23746	0.307446	0.290193	0.270493	0.243818	0.254185	0.236447	0.247981	0.246171	0.209417	0.310905	0.248938	0.298877	0.262776	0.266222	0.272017	0.178205	0.296219	0.296891	0.260514	0.249939	0.296068	0.269616	0.247903	0.262539	0.219585	0.261375	0.318149	0.305373	0.278262	0.25878	0.225483	0.206894	0.253809	0.299347	0.198297	0.243475	0.252568	0.257837	0.264298	0.184237	0.226615	0.308666
0.127618	0.0392455	0.153494	0.121937	0.18479	0.0457344	0.154759	0.0768638	0.2741	0.150538	0.141208	0.103575	0.13125	0.103018	0.152426	0.0368665	0.153877	0.218425	0.00625409	0.215475	0.140994	0.189318	0.134283	0.00776615	0.152222	0.129168	0.146295	0.0916472	0.139048	0.128521	0.134197	0.0660444	0.1446	0.151457	0.168792	0.147727	0.168405	0.102977	0.0477008	0.147266	0.10416	0.194162	0.124338	0.153363	0.171906	0.139811	0.15231	-0.00306473	0.133128	0.125667
0.509971	0.520715	0.500714	0.51559	0.513268	0.512486	0.527191	0.506277	0.514497	0.486806	0.519358	0.497394	0.511143	0.506282	0.509074	0.528458	0.509273	0.508979	0.524249	0.514639	0.514312	0.523873	0.515773	0.488722	0.507987	0.525478	0.51143	0.508934	0.506708	0.495506	0.531506	0.486996	0.522403	0.509174	0.516882	0.50934	0.522624	0.517214	0.51133	0.510521	0.517746	0.519939	0.518596	0.515572	0.507976	0.510625	0.513777	0.517879	0.510115	0.503417
0.394826	0.379688	0.387364	0.389988	0.402915	0.3972	0.387433	0.383161	0.403223	0.385547	0.401925	0.389147	0.390737	0.386544	0.383948	0.385042	0.388363	0.394032	0.394591	0.398002	0.41303	0.389886	0.40708	0.366205	0.394645	0.398034	0.395258	0.38657	0.410796	0.373375	0.376115	0.389165	0.3809	0.398223	0.403498	0.40527	0.410599	0.39348	0.396558	0.37824	0.406515	0.394516	0.393707	0.38156	0.399304	0.393061	0.391559	0.37711	0.397718	0.404876
0.442146	0.456582	0.452215	0.457058	0.440588	0.420761	0.438586	0.466118	0.443608	0.43064	0.446212	0.442619	0.443434	0.437473	0.458972	0.456518	0.449056	0.446064	0.464984	0.446973	0.453231	0.457746	0.455491	0.452147	0.445582	0.439075	0.449797	0.430235	0.452066	0.419839	0.43679	0.441902	0.450964	0.449485	0.46091	0.440352	0.461176	0.456018	0.459094	0.455703	0.461089	0.448337	0.451627	0.447909	0.442266	0.462751	0.441446	0.46019	0.456115	0.455429
0.40557	0.361049	0.381393	0.409035	0.376739	0.339289	0.362274	0.405329	0.409819	0.388957	0.390735	0.385523	0.357489	0.368218	0.353103	0.347968	0.382194	0.404271	0.382277	0.399422	0.369883	0.398963	0.408695	0.356618	0.415183	0.399748	0.429688	0.383336	0.393716	0.356174	0.383953	0.378975	0.367575	0.36216	0.403138	0.388998	0.4169	0.403067	0.379921	0.376471	0.402096	0.397668	0.369506	0.376244	0.375328	0.386093	0.387709	0.365641	0.399438	0.387618
0.31757	0.326852	0.342455	0.313251	0.316152	0.292471	0.30657	0.287118	0.377259	0.334943	0.31042	0.297897	0.303283	0.28979	0.25219	0.366356	0.280784	0.328103	0.340008	0.326468	0.323955	0.305258	0.380193	0.290799	0.326957	0.387704	0.32351	0.325443	0.309906	0.295484	0.302414	0.309338	0.28234	0.28966	0.354038	0.338726	0.320814	0.324973	0.31127	0.301651	0.339518	0.317719	0.28084	0.31073	0.313825	0.327601	0.309308	0.273576	0.320034	0.328515
0.395063	0.367389	0.371512	0.392591	0.380186	0.36471	0.366634	0.385385	0.416799	0.385528	0.398423	0.392606	0.381876	0.356282	0.384484	0.410279	0.357117	0.391239	0.389115	0.397052	0.423212	0.372752	0.408081	0.364029	0.374949	0.424725	0.39251	0.395335	0.391147	0.371358	0.392133	0.40096	0.378888	0.377083	0.395259	0.373757	0.407086	0.39487	0.409269	0.392305	0.412835	0.390554	0.366183	0.386921	0.365577	0.421366	0.394786	0.366252	0.418547	0.395094
0.471396	0.454864	0.467559	0.490101	0.481188	0.471525	0.468093	0.446354	0.478179	0.474535	0.477104	0.465144	0.458522	0.462728	0.472619	0.501345	0.465774	0.474619	0.453514	0.485437	0.461289	0.491064	0.479545	0.419076	0.459136	0.498202	0.456219	0.477936	0.477618	0.461899	0.457565	0.463388	0.46051	0.469691	0.484587	0.467625	0.509394	0.473724	0.463131	0.480635	0.467458	0.478744	0.467755	0.483289	0.480578	0.491733	0.4898	0.453124	0.474423	0.465113
0.44736	0.461229	0.438536	0.456799	0.452123	0.439628	0.412203	0.462699	0.434176	0.439454	0.449548	0.426429	0.454672	0.4332	0.448898	0.502348	0.454348	0.44558	0.436098	0.433046	0.432511	0.467548	0.46432	0.414346	0.428072	0.471635	0.448502	0.431883	0.461027	0.409507	0.416587	0.454462	0.423315	0.44327	0.475695	0.442501	0.483973	0.455725	0.469839	0.453315	0.446544	0.440423	0.440545	0.454074	0.451529	0.479414	0.452097	0.439674	0.451584	0.438322
0.455399	0.469048	0.465529	0.481146	0.467743	0.473235	0.448674	0.456779	0.483175	0.484839	0.456705	0.451432	0.449865	0.461207	0.468716	0.481003	0.459737	0.460873	0.477077	0.462484	0.473514	0.472915	0.473365	0.451755	0.476436	0.460056	0.470852	0.461842	0.470423	0.457283	0.447744	0.460127	0.465	0.460256	0.482541	0.460349	0.477839	0.463102	0.461867	0.45996	0.465616	0.473525	0.45829	0.480973	0.468778	0.486009	0.444476	0.441814	0.47256	0.460247
0.44217	0.396085	0.42577	0.436796	0.454126	0.390072	0.421963	0.414526	0.459243	0.430486	0.422792	0.419405	0.422052	0.429788	0.419801	0.431585	0.420156	0.418937	0.40733	0.449227	0.44166	0.456838	0.466529	0.399092	0.425793	0.460513	0.431228	0.418883	0.452828	0.421385	0.43187	0.39029	0.42506	0.421199	0.438083	0.45115	0.45642	0.433313	0.426051	0.422155	0.442323	0.438745	0.421961	0.408933	0.439443	0.434625	0.430844	0.403166	0.429149	0.423385
0.395371	0.340336	0.357609	0.357967	0.399038	0.358097	0.377223	0.356496	0.413406	0.38727	0.374792	0.369354	0.368174	0.393502	0.369847	0.332386	0.377485	0.370489	0.366043	0.406425	0.356172	0.388465	0.348861	0.333025	0.380123	0.374269	0.402824	0.384979	0.399305	0.371401	0.376552	0.361164	0.348281	0.3817	0.393875	0.390461	0.386793	0.371395	0.363022	0.351972	0.381519	0.39088	0.356674	0.366344	0.389998	0.392453	0.348321	0.355065	0.389084	0.389746
0.343626	0.278904	0.314485	0.291677	0.340042	0.320237	0.336041	0.296959	0.348636	0.306991	0.336406	0.345926	0.28165	0.332683	0.307127	0.218699	0.314697	0.337858	0.299946	0.35554	0.322832	0.321403	0.329978	0.270043	0.325645	0.332694	0.323945	0.321779	0.345702	0.335211	0.328717	0.328295	0.299509	0.335583	0.304378	0.365125	0.297421	0.297981	0.306318	0.266426	0.318056	0.323712	0.296321	0.296328	0.342619	0.344766	0.309482	0.259067	0.317794	0.359654
0.412864	0.35501	0.409642	0.364345	0.408588	0.371766	0.43381	0.384722	0.440148	0.408404	0.393183	0.395403	0.384645	0.3921	0.3864	0.358842	0.38049	0.441266	0.379438	0.424562	0.392074	0.418367	0.404132	0.374069	0.387038	0.412304	0.425355	0.420361	0.419333	0.379987	0.421619	0.416194	0.36857	0.429324	0.38939	0.440961	0.356765	0.382654	0.376616	0.352039	0.390296	0.402612	0.380433	0.395558	0.39585	0.423069	0.391193	0.363718	0.421959	0.427882
0.389979	0.302123	0.321913	0.358669	0.371736	0.351521	0.341054	0.339709	0.410069	0.365993	0.360702	0.362387	0.348426	0.348147	0.327311	0.33839	0.343382	0.372445	0.326117	0.398225	0.372845	0.382525	0.391933	0.303866	0.342441	0.371623	0.357546	0.356815	0.36897	0.376659	0.339104	0.365643	0.330416	0.373797	0.379763	0.396904	0.385313	0.352623	0.365262	0.330793	0.3747	0.367387	0.33	0.364054	0.356337	0.40881	0.363536	0.32759	0.370164	0.392264
0.381213	0.35671	0.368803	0.370018	0.392291	0.373039	0.374308	0.370693	0.372541	0.385487	0.394358	0.399542	0.360291	0.368566	0.367475	0.39322	0.355177	0.392095	0.373184	0.390281	0.367437	0.378073	0.395076	0.343313	0.371919	0.395234	0.369326	0.393408	0.416979	0.37186	0.377288	0.392598	0.366684	0.3698	0.381739	0.391113	0.408511	0.380624	0.386015	0.387016	0.370752	0.370686	0.357835	0.394234	0.37272	0.386248	0.374538	0.368809	0.391014	0.387025
0.358292	0.275378	0.326823	0.307111	0.338317	0.303268	0.344139	0.227298	0.320872	0.325721	0.369154	0.334444	0.316935	0.260602	0.267118	0.273165	0.29997	0.446993	0.259853	0.345209	0.309335	0.304785	0.328359	0.244833	0.352475	0.296246	0.360101	0.337767	0.303287	0.321469	0.328922	0.307853	0.337347	0.312378	0.331511	0.327732	0.281772	0.306939	0.289953	0.256718	0.266175	0.328978	0.240778	0.279685	0.250854	0.273364	0.334726	0.232694	0.327225	0.295854
0.451975	0.439213	0.439215	0.458295	0.441668	0.40775	0.411981	0.432151	0.464437	0.433332	0.431986	0.436575	0.434659	0.431408	0.430672	0.448359	0.446587	0.452428	0.441669	0.46431	0.472314	0.455054	0.444168	0.402651	0.437364	0.460221	0.459143	0.433174	0.432624	0.43136	0.436456	0.429861	0.445417	0.435735	0.465297	0.43435	0.45495	0.436939	0.459734	0.447744	0.460134	0.439763	0.436169	0.437037	0.441145	0.452055	0.43096	0.407939	0.466109	0.426842
0.445922	0.43284	0.433751	0.451409	0.475563	0.428836	0.45715	0.421655	0.471326	0.462988	0.445618	0.441091	0.447171	0.428517	0.456216	0.442571	0.43615	0.458727	0.438512	0.477615	0.440401	0.475744	0.444198	0.388791	0.434725	0.448516	0.448939	0.472492	0.450502	0.434458	0.467776	0.425566	0.461833	0.459963	0.441811	0.464852	0.441491	0.454469	0.435623	0.428436	0.465137	0.446564	0.438989	0.477415	0.465593	0.461506	0.436961	0.409814	0.470976	0.450436
0.191969	0.106699	0.175608	0.185324	0.223517	0.124228	0.193902	0.132582	0.287732	0.178124	0.174056	0.174988	0.198844	0.132003	0.187931	0.0782379	0.190742	0.234435	0.0869356	0.272464	0.215077	0.251298	0.209278	0.0453684	0.194683	0.182143	0.165363	0.144147	0.19072	0.165159	0.174458	0.128655	0.20541	0.195029	0.184685	0.160119	0.220941	0.174615	0.111264	0.18872	0.15929	0.223578	0.174264	0.210852	0.246358	0.217026	0.211469	0.0844814	0.184689	0.168736
0.462805	0.454896	0.443641	0.455513	0.458666	0.412846	0.447263	0.448369	0.474459	0.426775	0.472749	0.44024	0.466608	0.417453	0.438287	0.447842	0.450153	0.465706	0.44742	0.453919	0.464869	0.454455	0.465793	0.433587	0.435672	0.463254	0.46025	0.44008	0.437033	0.419876	0.455878	0.446324	0.441125	0.446726	0.465605	0.446656	0.478562	0.467594	0.440369	0.442461	0.464411	0.464954	0.436313	0.472362	0.439072	0.457153	0.453596	0.451515	0.469224	0.451942
0.427977	0.386519	0.410274	0.387687	0.388674	0.430313	0.381721	0.372713	0.447608	0.435816	0.416543	0.408242	0.428903	0.373972	0.356081	0.393976	0.371104	0.41991	0.414517	0.381512	0.443832	0.377327	0.426221	0.406051	0.385324	0.394461	0.426697	0.413911	0.442039	0.427155	0.392767	0.43322	0.351359	0.40348	0.366219	0.447339	0.403218	0.374295	0.394771	0.383215	0.446418	0.384361	0.370397	0.425092	0.386773	0.405508	0.402327	0.377061	0.406766	0.449259
0.313923	0.283421	0.274997	0.303139	0.306566	0.327073	0.310631	0.305905	0.340594	0.344644	0.358373	0.300673	0.328359	0.247128	0.27025	0.237979	0.281318	0.343179	0.314452	0.288708	0.35252	0.253939	0.349063	0.288807	0.289461	0.307862	0.324386	0.300685	0.333504	0.293022	0.293341	0.313665	0.269282	0.309532	0.275936	0.347908	0.2981	0.313967	0.309753	0.289197	0.355755	0.294738	0.287302	0.31989	0.289256	0.317991	0.302794	0.265205	0.29305	0.33537
0.449714	0.417043	0.437615	0.459287	0.452543	0.458544	0.44357	0.454203	0.451256	0.461272	0.456509	0.461757	0.437841	0.452139	0.452084	0.415208	0.449339	0.451134	0.417392	0.462429	0.450394	0.439958	0.440486	0.437941	0.442473	0.432018	0.45672	0.428955	0.465123	0.448486	0.426639	0.463589	0.453149	0.449895	0.43983	0.437147	0.445424	0.449008	0.435917	0.441164	0.449883	0.448548	0.454258	0.464077	0.465585	0.452904	0.433596	0.42811	0.450356	0.459249
0.441208	0.438302	0.409301	0.441539	0.442207	0.417233	0.413249	0.389614	0.438943	0.422284	0.417942	0.398399	0.417394	0.408404	0.422126	0.44559	0.426284	0.427374	0.413386	0.446103	0.427855	0.437074	0.420065	0.390442	0.403623	0.437756	0.422418	0.439905	0.421778	0.401483	0.425083	0.412011	0.434838	0.410121	0.452014	0.421781	0.467096	0.423813	0.426037	0.434316	0.433191	0.444355	0.42901	0.433201	0.446591	0.444785	0.421873	0.392701	0.425626	0.410639
0.424103	0.474729	0.450104	0.454385	0.420596	0.400984	0.392348	0.441486	0.464415	0.422047	0.419382	0.41391	0.419586	0.412601	0.430098	0.473089	0.430064	0.420946	0.438995	0.423406	0.416988	0.432539	0.431352	0.428517	0.424189	0.485729	0.417991	0.424648	0.421261	0.393366	0.421519	0.416421	0.430614	0.434632	0.466013	0.429107	0.441485	0.441293	0.445298	0.441873	0.448883	0.436054	0.437277	0.425117	0.41809	0.463227	0.432177	0.431878	0.434487	0.434839
0.440575	0.449815	0.428496	0.45768	0.450481	0.451896	0.428082	0.413343	0.438761	0.45208	0.45525	0.42548	0.43114	0.440001	0.435437	0.464816	0.433239	0.439127	0.428017	0.451315	0.42753	0.45323	0.436155	0.390946	0.410988	0.474885	0.428125	0.44331	0.443221	0.433257	0.432335	0.431382	0.44948	0.442807	0.455995	0.431105	0.473981	0.458345	0.436236	0.436002	0.443034	0.461138	0.431845	0.457481	0.455464	0.453301	0.44818	0.408057	0.448854	0.434717
0.381741	0.360184	0.367884	0.39977	0.391828	0.348162	0.372725	0.351647	0.38759	0.376151	0.402817	0.384338	0.351238	0.363447	0.389284	0.404224	0.364459	0.387387	0.340651	0.393686	0.359636	0.413237	0.379116	0.310188	0.354826	0.404812	0.374787	0.383524	0.375965	0.348474	0.381462	0.381916	0.364272	0.379991	0.400193	0.376671	0.415725	0.388978	0.368478	0.377213	0.374749	0.390794	0.381771	0.403719	0.392521	0.404358	0.379327	0.348836	0.395762	0.362704
0.403493	0.412909	0.421025	0.456614	0.387787	0.388751	0.389688	0.453728	0.419175	0.405709	0.424789	0.39975	0.411367	0.417326	0.404145	0.465212	0.402249	0.392168	0.440848	0.407695	0.403741	0.4279	0.400069	0.433186	0.470599	0.403081	0.411644	0.406289	0.421829	0.372204	0.429933	0.412804	0.433122	0.383316	0.432992	0.399035	0.431715	0.398101	0.428985	0.413632	0.439862	0.413551	0.405876	0.414507	0.399305	0.438655	0.395333	0.416909	0.43762	0.436012
0.447869	0.35305	0.367175	0.391207	0.388519	0.291382	0.37372	0.379087	0.479927	0.492523	0.377816	0.397174	0.407972	0.382492	0.392183	0.39401	0.474242	0.436101	0.391933	0.393159	0.400732	0.440017	0.419831	0.376371	0.4059	0.335973	0.459958	0.390114	0.483999	0.340494	0.488839	0.3412	0.439018	0.320968	0.428975	0.422189	0.430152	0.344846	0.351713	0.451215	0.477814	0.438538	0.472881	0.389972	0.449551	0.333685	0.405976	0.416764	0.409283	0.374531
0.158896	0.0210503	0.120333	0.159001	0.167256	0.0776317	0.16444	0.0961506	0.258655	0.130059	0.13458	0.130666	0.124491	0.100794	0.192988	-5.13662e-05	0.172418	0.200743	0.01946	0.235593	0.13788	0.203605	0.11493	-0.0348864	0.138921	0.136391	0.184095	0.0999876	0.120553	0.113976	0.152835	0.0679363	0.148464	0.170941	0.161297	0.142185	0.146695	0.114338	0.0476819	0.125062	0.122836	0.171921	0.145079	0.180643	0.218993	0.166257	0.145482	0.0466804	0.12936	0.13376
0.24412	0.172532	0.274931	0.262346	0.265739	0.185153	0.272452	0.220385	0.367841	0.246689	0.248845	0.239589	0.267716	0.208742	0.270869	0.209184	0.265785	0.299279	0.17031	0.317953	0.282886	0.319805	0.265642	0.109186	0.263495	0.269627	0.249497	0.198903	0.256908	0.231933	0.241708	0.196109	0.277724	0.274404	0.288646	0.221688	0.279247	0.259775	0.181616	0.266399	0.225085	0.286912	0.258669	0.299464	0.284856	0.281803	0.291062	0.164118	0.248332	0.244666
0.437845	0.440994	0.482494	0.488032	0.442788	0.406921	0.466119	0.421459	0.475207	0.442472	0.454286	0.457507	0.438841	0.434135	0.457227	0.511012	0.493703	0.472132	0.433963	0.457086	0.443107	0.48503	0.471033	0.432313	0.461002	0.469721	0.458474	0.460027	0.449126	0.410313	0.450271	0.421681	0.49255	0.469266	0.493909	0.433872	0.498638	0.444002	0.447454	0.477526	0.45193	0.488613	0.460835	0.462854	0.48096	0.47072	0.475492	0.433724	0.459144	0.423204
0.507781	0.527345	0.519267	0.531981	0.518625	0.516437	0.53715	0.494922	0.51525	0.503816	0.524284	0.515373	0.497128	0.521713	0.513677	0.542856	0.508737	0.51018	0.507783	0.51838	0.500542	0.542651	0.487838	0.477278	0.478519	0.532982	0.522435	0.518793	0.517304	0.504227	0.54718	0.518659	0.510876	0.536066	0.524878	0.5067	0.54408	0.546071	0.530419	0.538072	0.520992	0.528171	0.539396	0.522906	0.534961	0.525893	0.536955	0.528545	0.513898	0.514307
0.298803	0.296216	0.238205	0.345905	0.305374	0.248363	0.258826	0.296364	0.331667	0.315577	0.295652	0.272943	0.275202	0.290055	0.272215	0.242374	0.365458	0.299581	0.327097	0.329502	0.311405	0.31142	0.320558	0.269665	0.256065	0.269354	0.287569	0.268092	0.301583	0.233883	0.367485	0.254839	0.32236	0.309899	0.334538	0.308785	0.319419	0.332141	0.29	0.278715	0.325557	0.294002	0.309335	0.275683	0.326852	0.274925	0.300435	0.229967	0.324823	0.28899
0.336877	0.348645	0.299414	0.330081	0.355858	0.234219	0.311336	0.342294	0.439239	0.34694	0.332248	0.326782	0.27544	0.299154	0.35264	0.333817	0.298402	0.324418	0.301264	0.3803	0.275662	0.359036	0.334352	0.264878	0.337715	0.208077	0.354864	0.313336	0.324874	0.350715	0.324098	0.303296	0.273983	0.296395	0.293937	0.331207	0.37637	0.29963	0.313862	0.374057	0.338784	0.350908	0.332016	0.333476	0.352168	0.280356	0.323068	0.300401	0.344208	0.290362
0.216323	0.103679	0.22759	0.228415	0.265437	0.163079	0.253402	0.169881	0.322616	0.22239	0.22707	0.219272	0.203061	0.200253	0.261649	0.0938923	0.240437	0.272799	0.0999767	0.327509	0.203689	0.298577	0.183187	0.0469577	0.214864	0.234376	0.250081	0.184424	0.216469	0.201495	0.253077	0.150677	0.222642	0.270481	0.246787	0.245728	0.216569	0.214224	0.126457	0.209148	0.214226	0.257417	0.215956	0.269536	0.293951	0.235641	0.218266	0.102701	0.226757	0.232212
0.215477	0.0876474	0.200755	0.213918	0.26267	0.167207	0.245281	0.163919	0.322542	0.220671	0.210383	0.216469	0.203599	0.190543	0.256106	0.0791866	0.217572	0.256074	0.0982943	0.302511	0.191823	0.280729	0.173077	0.0325051	0.201694	0.227318	0.226552	0.200362	0.211696	0.200203	0.238082	0.155352	0.207403	0.249382	0.208679	0.229472	0.206358	0.205288	0.119678	0.187481	0.194536	0.233836	0.196615	0.259912	0.282576	0.2428	0.203736	0.099976	0.204064	0.219188
0.216652	0.109689	0.238199	0.228062	0.259518	0.132682	0.214022	0.182428	0.331274	0.230685	0.193279	0.20886	0.221899	0.183138	0.268868	0.142686	0.233498	0.279242	0.115929	0.286551	0.238834	0.271788	0.209748	0.0963078	0.222868	0.203323	0.225394	0.196348	0.233161	0.195948	0.198748	0.152093	0.25151	0.225201	0.242478	0.197189	0.240871	0.19368	0.165675	0.239435	0.160127	0.26572	0.227912	0.261814	0.263452	0.240018	0.245256	0.133872	0.209812	0.191603
0.445682	0.455603	0.417611	0.421361	0.45482	0.452805	0.438205	0.436821	0.459035	0.435218	0.453332	0.427833	0.429851	0.407351	0.432746	0.483464	0.403194	0.47684	0.4496	0.460382	0.434745	0.449282	0.455591	0.42388	0.428704	0.467992	0.472636	0.445759	0.439955	0.397601	0.410125	0.440686	0.418166	0.463384	0.460111	0.453793	0.448453	0.456636	0.444376	0.423909	0.458145	0.419043	0.41031	0.431179	0.414688	0.437141	0.45406	0.429698	0.457545	0.453703
0.312469	0.263171	0.270212	0.251989	0.329789	0.301349	0.25498	0.267122	0.332454	0.314358	0.311718	0.304609	0.298215	0.286163	0.257473	0.195906	0.30739	0.289583	0.264418	0.325268	0.310774	0.259341	0.307732	0.264602	0.267109	0.303781	0.282678	0.265324	0.334114	0.304418	0.247436	0.30689	0.267451	0.328295	0.291553	0.316571	0.296165	0.286467	0.250377	0.216289	0.311828	0.287279	0.270287	0.284885	0.311044	0.282806	0.2616	0.23997	0.302302	0.297098
0.588371	0.592514	0.590464	0.588793	0.595892	0.588328	0.591518	0.601651	0.588028	0.57412	0.586955	0.589898	0.59272	0.596664	0.599831	0.592842	0.588985	0.590895	0.598545	0.597872	0.585803	0.588982	0.586498	0.585206	0.590924	0.602868	0.583466	0.589401	0.58696	0.592833	0.593479	0.58749	0.584191	0.596	0.593375	0.593294	0.589468	0.595907	0.602813	0.594003	0.585344	0.598227	0.588619	0.584758	0.590082	0.597901	0.59561	0.592329	0.594654	0.592221
0.457178	0.484024	0.464617	0.485154	0.457322	0.468631	0.454418	0.48619	0.467069	0.450525	0.47768	0.467453	0.461254	0.469105	0.490433	0.480061	0.473727	0.451211	0.479355	0.470996	0.455786	0.480395	0.45488	0.474987	0.474671	0.473342	0.471736	0.4698	0.471232	0.457303	0.466139	0.464414	0.47159	0.4648	0.49836	0.442813	0.488416	0.470145	0.48179	0.48273	0.468965	0.466856	0.478296	0.462025	0.46061	0.478123	0.462962	0.484529	0.476423	0.464152
0.446702	0.480598	0.459047	0.479868	0.452029	0.449315	0.452108	0.486503	0.446443	0.432703	0.457409	0.447395	0.450778	0.443931	0.46957	0.475952	0.45237	0.439145	0.483219	0.44117	0.448304	0.461661	0.446272	0.466735	0.460757	0.460968	0.447508	0.443614	0.463757	0.441772	0.45362	0.446158	0.445849	0.45875	0.480965	0.446032	0.469763	0.462534	0.466673	0.467883	0.460029	0.461523	0.461691	0.438962	0.441439	0.471207	0.454771	0.465729	0.459618	0.456872
0.474619	0.471215	0.497948	0.517121	0.458481	0.426543	0.452047	0.515616	0.488	0.454106	0.463913	0.483803	0.468093	0.492447	0.503857	0.518306	0.483382	0.472385	0.516851	0.486364	0.49937	0.515128	0.495255	0.505539	0.530465	0.443489	0.495034	0.479195	0.483422	0.450066	0.436258	0.494363	0.491857	0.495457	0.518549	0.45542	0.505761	0.490319	0.498824	0.49816	0.509841	0.48907	0.501162	0.49836	0.467364	0.52652	0.47416	0.492631	0.514242	0.500144
0.523726	0.535927	0.531138	0.542537	0.524418	0.529206	0.529122	0.545521	0.526545	0.514477	0.533605	0.531003	0.526839	0.533936	0.544752	0.547648	0.534635	0.522303	0.533443	0.533337	0.522115	0.538838	0.518474	0.536292	0.533177	0.527415	0.539043	0.538444	0.532827	0.520789	0.534281	0.525524	0.539641	0.529427	0.543212	0.514521	0.542174	0.532632	0.542253	0.544467	0.533378	0.532717	0.539859	0.529991	0.522988	0.540766	0.528197	0.541804	0.537658	0.533867
0.49808	0.483875	0.487805	0.498959	0.493264	0.491484	0.505959	0.517277	0.50939	0.471175	0.509838	0.507141	0.491175	0.498188	0.505135	0.5092	0.506682	0.496342	0.486451	0.509139	0.493627	0.515283	0.484029	0.503869	0.480483	0.486004	0.517026	0.492409	0.479678	0.485242	0.479025	0.498524	0.502873	0.510934	0.530453	0.495987	0.516595	0.504649	0.525102	0.513528	0.503925	0.490108	0.503946	0.51782	0.496821	0.505109	0.501719	0.520389	0.515722	0.508109
0.529638	0.553783	0.535301	0.535739	0.524159	0.532169	0.529803	0.533698	0.526893	0.512192	0.548661	0.536185	0.54123	0.531219	0.535533	0.543416	0.549793	0.533588	0.546033	0.535124	0.517134	0.547382	0.539098	0.535168	0.531431	0.562111	0.541646	0.543473	0.528767	0.521111	0.54017	0.523356	0.548181	0.530273	0.552011	0.526196	0.547361	0.545145	0.544647	0.546811	0.539084	0.53334	0.534603	0.531842	0.533332	0.537135	0.545836	0.540726	0.535352	0.530191
0.370656	0.300032	0.312698	0.322124	0.374598	0.308028	0.336018	0.271046	0.383103	0.368314	0.329254	0.319513	0.333583	0.322898	0.32736	0.340912	0.330523	0.37355	0.299124	0.383121	0.356303	0.357102	0.364886	0.266531	0.327598	0.350908	0.327219	0.37355	0.352909	0.318195	0.344964	0.297706	0.319744	0.305742	0.351221	0.380371	0.376163	0.321761	0.318922	0.330562	0.359206	0.363467	0.338655	0.320987	0.371242	0.332667	0.332189	0.266829	0.329419	0.350081
0.464723	0.478963	0.477097	0.500345	0.450826	0.432652	0.445889	0.4843	0.475239	0.437887	0.459242	0.459077	0.456439	0.471084	0.487799	0.485725	0.472317	0.463619	0.497242	0.466794	0.466963	0.489622	0.47172	0.469146	0.480914	0.453992	0.479499	0.456632	0.462826	0.447238	0.447714	0.460946	0.477852	0.475671	0.483939	0.4521	0.484786	0.482703	0.475159	0.484203	0.486132	0.478918	0.48275	0.475203	0.464115	0.494231	0.461076	0.486453	0.481961	0.470843
0.449468	0.473191	0.467529	0.481665	0.448652	0.447144	0.450507	0.488757	0.464625	0.437796	0.4612	0.46651	0.460866	0.456703	0.479163	0.468263	0.468615	0.449458	0.474569	0.45959	0.461169	0.477874	0.457352	0.489373	0.468386	0.464178	0.462181	0.45873	0.466617	0.440866	0.444571	0.467768	0.472257	0.469144	0.491314	0.437293	0.48125	0.475782	0.475718	0.479964	0.471235	0.465222	0.471083	0.475136	0.454707	0.487727	0.456715	0.466141	0.468755	0.472627
0.459965	0.463654	0.479069	0.489095	0.449887	0.421616	0.436629	0.504278	0.473416	0.43465	0.4631	0.47171	0.460936	0.478804	0.491731	0.489135	0.473004	0.455724	0.502123	0.473389	0.47747	0.491683	0.474408	0.484813	0.514691	0.457244	0.476341	0.461279	0.468274	0.436683	0.432493	0.477558	0.480205	0.483946	0.504173	0.435163	0.488872	0.485496	0.481079	0.471266	0.487896	0.461953	0.485132	0.484813	0.462593	0.504808	0.452112	0.457893	0.492622	0.476456
0.388392	0.390475	0.413565	0.442952	0.378218	0.344882	0.36341	0.440937	0.412572	0.374914	0.385878	0.39352	0.392059	0.40974	0.428524	0.414767	0.417154	0.39265	0.434826	0.39928	0.413366	0.430773	0.396815	0.431146	0.429534	0.345327	0.412717	0.394457	0.401	0.369608	0.35697	0.405016	0.419338	0.409013	0.441165	0.363485	0.431454	0.39832	0.411106	0.417839	0.427364	0.406846	0.42723	0.418977	0.393377	0.438893	0.388283	0.407457	0.431411	0.405058
0.384327	0.357667	0.36097	0.362337	0.388363	0.392956	0.37937	0.360989	0.391687	0.389312	0.37971	0.380719	0.379614	0.35861	0.353751	0.341662	0.354593	0.386513	0.370651	0.369674	0.405687	0.348624	0.389362	0.349993	0.356529	0.374579	0.376526	0.378218	0.395558	0.376841	0.372898	0.38241	0.346643	0.376123	0.353808	0.399445	0.370568	0.367126	0.369812	0.369995	0.391161	0.361085	0.365346	0.353611	0.367174	0.371196	0.376228	0.360838	0.367282	0.39786
0.428674	0.404922	0.405004	0.417211	0.442265	0.450924	0.427911	0.413983	0.439082	0.438316	0.444986	0.432031	0.436005	0.42161	0.418418	0.388731	0.419285	0.43764	0.41554	0.427472	0.454825	0.417003	0.431312	0.431945	0.412302	0.436083	0.437749	0.427759	0.443717	0.432314	0.418138	0.434945	0.413632	0.430025	0.421846	0.442243	0.431908	0.421998	0.425377	0.414168	0.444529	0.42373	0.431131	0.428587	0.437375	0.425459	0.433511	0.415255	0.421581	0.446383
0.292617	0.221592	0.265605	0.219106	0.30414	0.321218	0.276883	0.230722	0.296798	0.28285	0.280203	0.27852	0.265556	0.260509	0.231809	0.206854	0.231008	0.289589	0.245903	0.256567	0.314225	0.237714	0.306971	0.2365	0.256738	0.274346	0.263168	0.289465	0.311688	0.271817	0.246944	0.287396	0.219978	0.255951	0.234102	0.329952	0.243051	0.234984	0.269236	0.230204	0.288874	0.260385	0.234127	0.252126	0.267037	0.274879	0.257069	0.229855	0.256825	0.311039
0.321597	0.180932	0.205913	0.258116	0.275965	0.256898	0.266563	0.28327	0.32422	0.284628	0.30286	0.323073	0.28881	0.236847	0.275698	0.165105	0.225526	0.317068	0.236868	0.303548	0.318509	0.267637	0.293727	0.222129	0.197235	0.214951	0.271392	0.239257	0.288814	0.285152	0.244941	0.322004	0.249332	0.29591	0.286575	0.306951	0.301521	0.285601	0.260944	0.265413	0.330041	0.234798	0.254104	0.270505	0.269081	0.298495	0.320565	0.257207	0.300371	0.324219
0.433451	0.319082	0.34503	0.373231	0.400863	0.394168	0.372005	0.394868	0.424767	0.399966	0.408683	0.424136	0.409719	0.37497	0.397057	0.311909	0.358677	0.414547	0.35539	0.420325	0.416401	0.374444	0.418295	0.337438	0.34509	0.345754	0.37296	0.37203	0.408417	0.41869	0.353106	0.432675	0.359834	0.403171	0.397166	0.420309	0.408798	0.3866	0.370681	0.376023	0.424589	0.363617	0.374008	0.397952	0.388672	0.407121	0.42054	0.36953	0.412882	0.426112
0.415411	0.398401	0.401626	0.415074	0.426248	0.440145	0.416447	0.427568	0.414994	0.422546	0.432085	0.429982	0.414964	0.420272	0.417008	0.365796	0.418386	0.410271	0.386217	0.42776	0.423575	0.399563	0.410434	0.418084	0.409218	0.387978	0.412795	0.407422	0.439152	0.427951	0.398955	0.437665	0.408254	0.419527	0.412313	0.41958	0.410354	0.414673	0.414569	0.397556	0.421712	0.415937	0.42252	0.434798	0.428555	0.420373	0.403614	0.396609	0.421026	0.43367
0.121864	0.0155956	0.0812859	0.0397009	0.105083	0.127368	0.0814991	0.033832	0.141539	0.112653	0.106245	0.0968113	0.0875337	0.0567501	0.0355585	0.0159908	0.043972	0.123616	0.0953968	0.0802328	0.156658	0.0702342	0.166159	0.0303714	0.0939265	0.124907	0.0860732	0.117194	0.126905	0.0791831	0.0779082	0.101228	0.0433592	0.0829477	0.0601631	0.164862	0.0574146	0.0568065	0.0582882	0.0253243	0.140089	0.0768884	0.0507905	0.0644049	0.0789825	0.0867548	0.0788512	0.0275296	0.0721045	0.146164
0.47593	0.471189	0.487768	0.496377	0.458185	0.4305	0.455825	0.496317	0.483931	0.482488	0.470474	0.480856	0.461401	0.463933	0.489877	0.500874	0.477377	0.47656	0.499559	0.473454	0.492125	0.474167	0.485552	0.500139	0.49875	0.426198	0.493228	0.485267	0.484171	0.448161	0.453108	0.482999	0.485022	0.480732	0.500533	0.454013	0.498051	0.470969	0.498318	0.494308	0.497469	0.480051	0.489038	0.475206	0.463702	0.499421	0.474564	0.491233	0.491187	0.483286
0.412751	0.400851	0.405963	0.409687	0.408483	0.398351	0.402105	0.404823	0.410234	0.402026	0.404411	0.407976	0.385511	0.40686	0.406549	0.399708	0.40112	0.413936	0.412752	0.406149	0.424259	0.394789	0.424268	0.413002	0.411205	0.378292	0.418207	0.412235	0.427077	0.39334	0.394941	0.413128	0.402884	0.400649	0.405773	0.407877	0.415784	0.393454	0.428671	0.414305	0.420368	0.403855	0.406661	0.400446	0.405777	0.410006	0.394688	0.404738	0.408677	0.416519
0.468322	0.456074	0.466258	0.467712	0.465731	0.424846	0.461587	0.478968	0.476846	0.472949	0.477652	0.477807	0.457089	0.453839	0.458722	0.443278	0.45442	0.467485	0.466094	0.467295	0.485912	0.457017	0.472261	0.485862	0.478033	0.420097	0.471856	0.466404	0.48699	0.455467	0.463159	0.480166	0.453874	0.472326	0.459432	0.448048	0.48128	0.467526	0.482934	0.471682	0.472871	0.461558	0.459965	0.451285	0.460801	0.478857	0.465387	0.479946	0.472208	0.479273
0.480901	0.484214	0.483377	0.485977	0.48679	0.497533	0.476011	0.48826	0.492417	0.496841	0.491952	0.490832	0.484448	0.482305	0.486046	0.480096	0.487899	0.488403	0.488495	0.483321	0.495535	0.482314	0.474677	0.490651	0.484252	0.48055	0.486563	0.491833	0.490033	0.482653	0.480293	0.493428	0.484751	0.485977	0.496319	0.477169	0.495842	0.486567	0.489458	0.480879	0.484748	0.478695	0.487939	0.492715	0.484918	0.487851	0.47988	0.486502	0.48544	0.488507
0.163226	0.147907	0.13556	0.13973	0.155256	0.173817	0.146881	0.138413	0.174413	0.154684	0.176031	0.172262	0.147433	0.152554	0.145371	0.169687	0.162716	0.169786	0.153818	0.157676	0.163718	0.13475	0.146956	0.186287	0.141776	0.172155	0.167212	0.164495	0.152283	0.144502	0.160202	0.16529	0.176902	0.164055	0.149896	0.153544	0.160144	0.179246	0.155906	0.170483	0.174828	0.137128	0.147147	0.165602	0.15974	0.14621	0.14307	0.152255	0.157774	0.165594
0.468644	0.449711	0.453334	0.454593	0.471474	0.465985	0.460924	0.458222	0.475204	0.477312	0.47487	0.468853	0.460831	0.449913	0.452663	0.423107	0.456965	0.468887	0.446619	0.460641	0.479643	0.448661	0.471155	0.461528	0.4477	0.457738	0.468143	0.455768	0.471707	0.463092	0.458968	0.468786	0.456125	0.460307	0.450494	0.474835	0.460106	0.461988	0.454876	0.449107	0.475263	0.459995	0.452038	0.460998	0.467181	0.460731	0.465228	0.4456	0.46143	0.47955
0.438953	0.439339	0.434205	0.437509	0.45195	0.424668	0.417352	0.440593	0.465481	0.444242	0.424496	0.422769	0.41723	0.433848	0.445392	0.426007	0.429347	0.442519	0.425399	0.457416	0.435401	0.447729	0.436813	0.404297	0.437066	0.467631	0.438729	0.44433	0.425086	0.42362	0.414068	0.426423	0.440405	0.439232	0.474594	0.432762	0.459186	0.430521	0.432266	0.420423	0.425173	0.450277	0.431482	0.449862	0.448554	0.440974	0.433073	0.418866	0.44168	0.420863
0.437186	0.430249	0.425642	0.410043	0.442113	0.461564	0.422734	0.416615	0.436094	0.447239	0.442378	0.43978	0.428719	0.416242	0.410382	0.413188	0.420739	0.437076	0.433152	0.420337	0.454007	0.395737	0.437965	0.413579	0.402161	0.429556	0.432304	0.421316	0.456938	0.443972	0.409172	0.456144	0.414514	0.433538	0.424326	0.453004	0.422987	0.441386	0.421908	0.423301	0.43532	0.414376	0.417511	0.422471	0.432846	0.432925	0.419477	0.411322	0.424462	0.455583
0.459145	0.419037	0.418165	0.445426	0.454453	0.438109	0.439277	0.449307	0.453954	0.451527	0.448128	0.465189	0.44731	0.439405	0.447896	0.393849	0.435755	0.450101	0.417922	0.457417	0.458629	0.431914	0.434933	0.4281	0.395012	0.419818	0.434814	0.414192	0.451231	0.459875	0.427217	0.4674	0.434806	0.448938	0.443961	0.442857	0.461561	0.453276	0.438312	0.443153	0.453812	0.424124	0.443326	0.442784	0.446905	0.452476	0.460232	0.437897	0.449719	0.461411
0.37579	0.324288	0.34855	0.3245	0.38985	0.391994	0.367572	0.324395	0.365754	0.3663	0.348507	0.365586	0.360916	0.357236	0.31719	0.320563	0.333312	0.373301	0.339179	0.345755	0.377784	0.319771	0.374639	0.332291	0.345128	0.339215	0.342711	0.374782	0.394617	0.368291	0.341865	0.378415	0.314186	0.353593	0.324362	0.395227	0.333527	0.317117	0.364068	0.312796	0.363089	0.354882	0.33504	0.342068	0.36676	0.346266	0.349622	0.32086	0.336862	0.390609
0.414831	0.397289	0.406257	0.373911	0.403885	0.422462	0.399799	0.365545	0.413541	0.421882	0.398489	0.408924	0.391941	0.388303	0.361934	0.381649	0.384015	0.41146	0.421188	0.395201	0.42319	0.36065	0.406635	0.390171	0.403848	0.371773	0.39644	0.421656	0.42255	0.405551	0.384267	0.401811	0.365749	0.388759	0.383321	0.42828	0.385668	0.387802	0.399881	0.38067	0.405741	0.402547	0.380623	0.379486	0.396554	0.405127	0.39219	0.371577	0.393901	0.417504
0.449665	0.386048	0.412542	0.398128	0.429448	0.434172	0.435021	0.399984	0.441113	0.427618	0.431792	0.428494	0.404358	0.428129	0.439142	0.387497	0.428722	0.439712	0.375759	0.406105	0.449118	0.397212	0.406713	0.426838	0.397512	0.388718	0.415038	0.445521	0.450557	0.425561	0.387887	0.433643	0.407773	0.410242	0.402672	0.442469	0.421185	0.432983	0.414441	0.42543	0.443192	0.430801	0.443723	0.398733	0.427666	0.402496	0.394404	0.422264	0.419866	0.442246
0.483704	0.474282	0.480876	0.465458	0.477244	0.466244	0.470499	0.480298	0.483335	0.487142	0.471187	0.490689	0.470743	0.468127	0.45446	0.469198	0.457257	0.482126	0.475193	0.468037	0.494814	0.46337	0.49616	0.477121	0.478694	0.46688	0.476163	0.47821	0.488414	0.482781	0.45931	0.488855	0.457849	0.47932	0.453466	0.484264	0.454374	0.467776	0.457097	0.481225	0.485451	0.494521	0.460174	0.483295	0.474232	0.470311	0.475446	0.458251	0.474045	0.494623
0.313893	0.238273	0.298653	0.241256	0.291048	0.2812	0.298968	0.216517	0.330561	0.352592	0.289588	0.299191	0.296657	0.249937	0.243448	0.226979	0.272226	0.304004	0.331557	0.296249	0.347287	0.247526	0.312111	0.281647	0.300792	0.236834	0.262056	0.302036	0.351716	0.298502	0.247351	0.285735	0.245225	0.269309	0.259734	0.346728	0.268728	0.259796	0.276478	0.277333	0.322945	0.312352	0.261361	0.241862	0.305991	0.309217	0.316612	0.245828	0.261739	0.331347
0.429081	0.403944	0.409357	0.381175	0.416063	0.421452	0.418559	0.378042	0.425587	0.443029	0.422368	0.421951	0.405921	0.393575	0.38233	0.415908	0.378951	0.427773	0.41533	0.395192	0.443362	0.366424	0.414878	0.410371	0.417072	0.400899	0.396203	0.418105	0.442273	0.410445	0.378434	0.416811	0.378627	0.393338	0.37866	0.442877	0.40441	0.397269	0.410275	0.410871	0.42931	0.405876	0.388904	0.380576	0.390074	0.411327	0.423635	0.403882	0.389559	0.444629
0.416882	0.380096	0.402386	0.379463	0.419157	0.415498	0.396275	0.365706	0.425635	0.427271	0.410545	0.410819	0.402327	0.383179	0.365406	0.353594	0.382674	0.417301	0.379743	0.38771	0.4415	0.367311	0.418892	0.389569	0.408523	0.400572	0.40984	0.414719	0.438758	0.413618	0.384377	0.412293	0.375995	0.39054	0.37545	0.43453	0.388353	0.385815	0.389781	0.375412	0.415648	0.398142	0.379209	0.378825	0.398477	0.396335	0.395866	0.378127	0.38426	0.428456
0.434073	0.384344	0.388291	0.395661	0.42112	0.398608	0.397468	0.388914	0.42042	0.412304	0.390935	0.412569	0.401691	0.390125	0.403906	0.391399	0.397744	0.415071	0.383967	0.419278	0.419832	0.386399	0.416592	0.372568	0.37514	0.374094	0.398448	0.406843	0.420491	0.425917	0.398369	0.41767	0.395015	0.402115	0.397415	0.420521	0.402654	0.396422	0.394233	0.400797	0.411337	0.402018	0.401748	0.4014	0.41831	0.410163	0.415959	0.386943	0.401822	0.413282
0.453259	0.421122	0.42706	0.414645	0.456052	0.459771	0.433093	0.414931	0.451192	0.453674	0.455339	0.453101	0.446791	0.424291	0.409826	0.4059	0.406716	0.457289	0.418201	0.427191	0.472286	0.407824	0.457516	0.441137	0.424895	0.418831	0.43565	0.44398	0.467503	0.448705	0.418608	0.45895	0.394768	0.427129	0.408559	0.470155	0.440072	0.43353	0.431247	0.416043	0.452843	0.42709	0.423047	0.418746	0.440175	0.435143	0.441643	0.41442	0.428586	0.46987
0.447271	0.397675	0.395584	0.390484	0.434713	0.430655	0.403502	0.38614	0.432358	0.444319	0.441758	0.431443	0.427877	0.377622	0.372707	0.361265	0.368526	0.443149	0.401854	0.400126	0.459124	0.372727	0.449934	0.408049	0.397405	0.389119	0.415491	0.426289	0.458001	0.415267	0.389949	0.44162	0.358795	0.389972	0.364804	0.458858	0.416458	0.412598	0.409402	0.385486	0.442532	0.397645	0.388295	0.384188	0.413592	0.413625	0.427817	0.386574	0.405737	0.46043
0.436679	0.328937	0.34132	0.338495	0.410973	0.406278	0.388997	0.375925	0.442421	0.403853	0.409665	0.431387	0.381457	0.373356	0.343824	0.297519	0.340124	0.420801	0.355487	0.420839	0.430826	0.348499	0.423296	0.345463	0.33395	0.375505	0.374401	0.379929	0.421542	0.42497	0.350584	0.437154	0.328935	0.397062	0.367037	0.451627	0.400261	0.371666	0.388299	0.345962	0.414179	0.360951	0.366073	0.380025	0.371368	0.414284	0.400094	0.342201	0.397603	0.440901
0.49281	0.492285	0.488772	0.479054	0.501975	0.506784	0.493074	0.479096	0.493671	0.515642	0.500017	0.502748	0.497076	0.49351	0.478364	0.47019	0.479166	0.499085	0.484734	0.480068	0.509504	0.470203	0.48871	0.491574	0.481579	0.484897	0.491609	0.511794	0.506868	0.492482	0.482057	0.504159	0.471489	0.486257	0.481598	0.510597	0.489698	0.490227	0.503235	0.475636	0.491964	0.489617	0.484529	0.479563	0.492934	0.484391	0.487282	0.47769	0.490789	0.503281
0.395657	0.378145	0.386208	0.379745	0.402686	0.395307	0.410452	0.379895	0.407875	0.404582	0.398696	0.40681	0.388186	0.392021	0.370172	0.3976	0.385808	0.400763	0.365267	0.393746	0.409656	0.385564	0.40168	0.381541	0.387066	0.385692	0.399916	0.418949	0.409217	0.388635	0.390887	0.404717	0.371507	0.399545	0.38012	0.423368	0.395667	0.391909	0.392757	0.370844	0.392202	0.395751	0.390185	0.372762	0.397598	0.396955	0.378604	0.386457	0.381715	0.410615
0.373637	0.330307	0.356158	0.347833	0.388141	0.401648	0.378475	0.348059	0.390547	0.377438	0.378956	0.376128	0.3851	0.359732	0.356823	0.35229	0.349863	0.384223	0.36518	0.363964	0.420172	0.349378	0.396455	0.354016	0.376902	0.361458	0.377555	0.389937	0.401073	0.369439	0.349977	0.369878	0.3522	0.379336	0.34289	0.400181	0.37546	0.35448	0.363997	0.345318	0.385745	0.364079	0.356329	0.351706	0.374817	0.372545	0.358627	0.347891	0.363487	0.382669
0.349129	0.240759	0.298803	0.279628	0.343387	0.317071	0.318851	0.279772	0.393382	0.356282	0.357052	0.320229	0.33847	0.290302	0.303382	0.297886	0.298419	0.356705	0.250054	0.361023	0.336018	0.350341	0.391781	0.296251	0.346757	0.394243	0.362815	0.356951	0.32726	0.320873	0.315943	0.333823	0.330574	0.343708	0.311638	0.32984	0.343526	0.321307	0.305455	0.271831	0.35996	0.310152	0.28835	0.310486	0.323147	0.312067	0.322128	0.261628	0.324852	0.336501
0.371181	0.292397	0.289431	0.313579	0.335911	0.334177	0.316814	0.384721	0.375056	0.314832	0.347954	0.379643	0.323965	0.333134	0.351162	0.267958	0.325069	0.348947	0.308883	0.370555	0.361778	0.315671	0.347046	0.324336	0.286783	0.314176	0.365034	0.310121	0.328593	0.353032	0.326538	0.398424	0.331759	0.355819	0.35042	0.355685	0.361032	0.333642	0.349871	0.350413	0.366381	0.303921	0.314436	0.384686	0.335652	0.372673	0.347707	0.350848	0.360535	0.383173
0.37337	0.307968	0.315731	0.332071	0.354469	0.346191	0.33283	0.370882	0.377452	0.353822	0.372757	0.383278	0.361575	0.335907	0.35881	0.268281	0.324015	0.370544	0.332439	0.370519	0.375028	0.332076	0.365334	0.336606	0.303728	0.327165	0.356263	0.32873	0.357729	0.367675	0.319328	0.39176	0.336974	0.359785	0.359777	0.355554	0.378957	0.371764	0.350261	0.352693	0.381065	0.324957	0.331941	0.367482	0.342255	0.362144	0.364417	0.349615	0.361792	0.380944
0.443701	0.355626	0.360146	0.436557	0.432269	0.401463	0.411611	0.433043	0.439219	0.423146	0.439134	0.435749	0.460794	0.392882	0.443644	0.326005	0.39471	0.442785	0.395374	0.430221	0.440152	0.3947	0.434339	0.383043	0.335639	0.37277	0.423239	0.387242	0.420551	0.411548	0.409463	0.447246	0.392166	0.428425	0.450687	0.412654	0.451942	0.431203	0.426463	0.425629	0.462449	0.376101	0.406737	0.431077	0.420462	0.434615	0.445052	0.421328	0.422797	0.451738
0.320212	0.281918	0.288545	0.29948	0.309248	0.297504	0.314051	0.323173	0.318387	0.304506	0.308392	0.341448	0.305397	0.298854	0.306034	0.260944	0.314882	0.315352	0.29117	0.327041	0.313621	0.294664	0.311684	0.324906	0.28267	0.274237	0.323043	0.301065	0.303949	0.324333	0.298781	0.332479	0.31921	0.327134	0.299301	0.305124	0.322558	0.32086	0.323479	0.318264	0.31841	0.293911	0.299933	0.317329	0.313303	0.318349	0.308697	0.318725	0.325796	0.327694
0.309522	0.244754	0.255101	0.297468	0.289836	0.273958	0.293239	0.316837	0.309609	0.280549	0.31112	0.321298	0.303304	0.285999	0.318388	0.239125	0.291843	0.310666	0.27373	0.310664	0.31218	0.296388	0.297521	0.307708	0.25384	0.253662	0.312674	0.267249	0.293126	0.304395	0.285659	0.314976	0.296828	0.311981	0.318218	0.298282	0.324905	0.307305	0.314001	0.323447	0.320913	0.275422	0.29474	0.304504	0.29115	0.312205	0.311006	0.316805	0.304507	0.317222
0.300924	0.217248	0.226489	0.265665	0.274274	0.272719	0.279126	0.288419	0.313305	0.292551	0.299503	0.309569	0.28064	0.247682	0.273558	0.217273	0.256016	0.307477	0.254582	0.296109	0.308924	0.261142	0.280384	0.266935	0.238381	0.255326	0.294874	0.258226	0.289396	0.290945	0.24544	0.312701	0.264496	0.287019	0.292689	0.288178	0.297574	0.281837	0.281215	0.268582	0.312157	0.248903	0.274822	0.271858	0.282183	0.294781	0.308655	0.257492	0.298253	0.311383
0.3844	0.215994	0.249615	0.299249	0.326324	0.343132	0.306138	0.317143	0.367113	0.321802	0.34584	0.367136	0.340418	0.28376	0.31328	0.201662	0.269717	0.358501	0.270679	0.389569	0.365683	0.290436	0.351206	0.250314	0.218639	0.27275	0.286648	0.260751	0.334178	0.37252	0.266718	0.378542	0.286376	0.347214	0.321838	0.367934	0.341888	0.338058	0.282633	0.289433	0.388826	0.267981	0.316054	0.324022	0.312246	0.352056	0.39363	0.281898	0.370129	0.386118
0.346217	0.260167	0.269508	0.292799	0.315288	0.303714	0.305669	0.345222	0.347813	0.302585	0.332569	0.359549	0.317396	0.302301	0.323112	0.25092	0.298167	0.329596	0.280212	0.351089	0.347909	0.292123	0.316495	0.308165	0.250203	0.27507	0.342616	0.286523	0.313647	0.34155	0.290972	0.374707	0.310778	0.334367	0.324871	0.33596	0.341725	0.309604	0.313859	0.344922	0.350152	0.290021	0.288662	0.349096	0.316803	0.338372	0.335382	0.33411	0.342264	0.354243
0.438402	0.365696	0.363312	0.399367	0.41404	0.414438	0.390931	0.425774	0.444745	0.415276	0.426874	0.447008	0.383821	0.397907	0.403375	0.343265	0.38289	0.415581	0.381968	0.448431	0.443048	0.396042	0.408043	0.382768	0.357066	0.383864	0.415854	0.385882	0.407757	0.455101	0.370858	0.458506	0.380286	0.422048	0.414951	0.418666	0.421712	0.412824	0.39652	0.408468	0.436179	0.383885	0.392589	0.429787	0.402942	0.43117	0.417182	0.394538	0.438838	0.436666
0.489714	0.403338	0.422454	0.434043	0.459386	0.449532	0.432964	0.442925	0.469406	0.450013	0.4603	0.482276	0.436859	0.444081	0.440238	0.403665	0.43564	0.455264	0.403293	0.502717	0.472457	0.429274	0.46244	0.419236	0.410937	0.410241	0.440042	0.420116	0.452867	0.509926	0.413513	0.48749	0.434266	0.470181	0.445014	0.467482	0.458034	0.455215	0.427527	0.437593	0.46441	0.432172	0.450155	0.455605	0.448454	0.459368	0.471639	0.424145	0.478064	0.467587
0.394129	0.337156	0.331477	0.361508	0.38751	0.362943	0.358116	0.358177	0.381454	0.378592	0.369832	0.379769	0.366083	0.347162	0.360344	0.308408	0.350379	0.374508	0.341445	0.39377	0.390308	0.349494	0.374494	0.335092	0.326903	0.333405	0.352733	0.347446	0.376346	0.402231	0.342591	0.385964	0.346201	0.367566	0.365814	0.377123	0.372992	0.353082	0.346548	0.350395	0.386202	0.361159	0.355439	0.371645	0.377646	0.378033	0.37775	0.335562	0.364816	0.380934
0.474884	0.437726	0.434248	0.444586	0.468818	0.454364	0.443483	0.454233	0.473901	0.464234	0.469575	0.474738	0.476225	0.445804	0.457281	0.401823	0.440058	0.457728	0.429736	0.47708	0.472088	0.438197	0.472307	0.436981	0.431775	0.423038	0.445732	0.438678	0.467177	0.489402	0.420424	0.484859	0.435048	0.460309	0.453198	0.468266	0.458359	0.44984	0.445227	0.440175	0.472817	0.447868	0.44541	0.462982	0.455243	0.464403	0.462387	0.437062	0.472403	0.473296
0.435191	0.387317	0.391345	0.384125	0.42727	0.412223	0.418531	0.409904	0.438989	0.422681	0.424714	0.439588	0.422048	0.408922	0.392685	0.384928	0.391825	0.429012	0.376528	0.433792	0.432348	0.397493	0.429911	0.388468	0.379771	0.38781	0.406407	0.415513	0.432621	0.438049	0.391543	0.445883	0.390945	0.42251	0.407229	0.444334	0.418938	0.413051	0.394138	0.391619	0.42135	0.409291	0.403831	0.405888	0.411439	0.425765	0.414501	0.391581	0.415708	0.436129
0.434538	0.263548	0.24722	0.316456	0.354302	0.345946	0.314759	0.375207	0.410449	0.323392	0.370997	0.411189	0.326299	0.332113	0.337885	0.200843	0.270246	0.367537	0.281769	0.443676	0.392145	0.338318	0.375638	0.257561	0.233992	0.283095	0.340732	0.299765	0.356432	0.428144	0.292664	0.420765	0.322455	0.389439	0.357716	0.392293	0.384078	0.350005	0.338123	0.309258	0.399369	0.296136	0.339033	0.367402	0.352881	0.386978	0.385521	0.2848	0.412726	0.396033
0.374362	0.347032	0.36161	0.347006	0.389204	0.399217	0.37448	0.352045	0.368773	0.366847	0.36801	0.368986	0.365413	0.371609	0.345289	0.340481	0.363937	0.364491	0.350959	0.365685	0.386576	0.339222	0.394858	0.352556	0.370983	0.365239	0.36305	0.391059	0.388924	0.381762	0.367881	0.373384	0.335931	0.36113	0.349212	0.39136	0.357063	0.347157	0.381489	0.355473	0.372622	0.363747	0.358712	0.368521	0.375078	0.362342	0.362743	0.349577	0.362879	0.383931
0.454101	0.432305	0.436058	0.430499	0.45537	0.457156	0.444591	0.434259	0.452919	0.450435	0.456274	0.452031	0.44732	0.432336	0.426041	0.410354	0.43234	0.446591	0.449819	0.446824	0.470073	0.411465	0.448206	0.448393	0.427542	0.43104	0.440179	0.445148	0.466466	0.461148	0.426419	0.458574	0.417364	0.443968	0.425663	0.462908	0.443433	0.438844	0.443352	0.430524	0.452332	0.442139	0.431083	0.440606	0.443705	0.441885	0.442852	0.429366	0.442453	0.46447
0.340091	0.287549	0.29782	0.306147	0.352808	0.352579	0.332679	0.304078	0.338557	0.326788	0.306819	0.325654	0.332091	0.313596	0.304524	0.280829	0.31195	0.338305	0.311519	0.324622	0.343857	0.296699	0.352529	0.273871	0.31704	0.312118	0.313982	0.334152	0.352679	0.343002	0.315669	0.328134	0.30889	0.319462	0.303532	0.351752	0.320753	0.29358	0.328615	0.296734	0.340606	0.313662	0.313171	0.316619	0.339502	0.319309	0.316638	0.286058	0.30359	0.349446
-0.35445	-0.341205	-0.376896	-0.376165	-0.371875	-0.344467	-0.306122	-0.358084	-0.334365	-0.365209	-0.36418	-0.350521	-0.352259	-0.328599	-0.349466	-0.250421	-0.369717	-0.356371	-0.357482	-0.349956	-0.350941	-0.363609	-0.354055	-0.363231	-0.330025	-0.369932	-0.354006	-0.303251	-0.351946	-0.352235	-0.361728	-0.359866	-0.295302	-0.363743	-0.383745	-0.375206	-0.37805	-0.33706	-0.361807	-0.381911	-0.360391	-0.366604	-0.288169	-0.360421	-0.353898	-0.369955	-0.354961	-0.364612	-0.354685	-0.372542
0.41194	0.388741	0.387772	0.384229	0.413329	0.419871	0.395381	0.38425	0.417825	0.414647	0.41075	0.410298	0.403463	0.391889	0.376897	0.374936	0.379559	0.411347	0.396979	0.39803	0.424051	0.382693	0.412891	0.395879	0.387991	0.394276	0.401475	0.402837	0.420321	0.402977	0.384594	0.420225	0.372338	0.395986	0.38076	0.427845	0.400413	0.397708	0.396308	0.384146	0.41115	0.394626	0.386843	0.39246	0.398137	0.397928	0.397943	0.382224	0.399884	0.424095
0.432332	0.416154	0.413644	0.410456	0.43398	0.440671	0.43179	0.405423	0.428407	0.431892	0.426462	0.420836	0.425862	0.415011	0.408606	0.407431	0.423855	0.430218	0.417662	0.425639	0.436607	0.398553	0.429038	0.415403	0.417111	0.426797	0.419991	0.438597	0.440065	0.42061	0.410254	0.431322	0.404851	0.415577	0.406169	0.438901	0.421687	0.421898	0.424877	0.409679	0.429947	0.420821	0.414927	0.419639	0.42773	0.416685	0.41893	0.396577	0.417683	0.433626
0.381841	0.350897	0.349244	0.357071	0.389997	0.369861	0.379466	0.352485	0.372636	0.378255	0.359067	0.366447	0.366641	0.365622	0.346279	0.325016	0.375798	0.37176	0.358158	0.373531	0.380593	0.34305	0.383011	0.355312	0.362583	0.349879	0.361887	0.380696	0.389955	0.380571	0.376822	0.375599	0.351942	0.368446	0.344461	0.379971	0.363003	0.342893	0.371247	0.350014	0.378519	0.375407	0.361272	0.366527	0.390027	0.356225	0.366413	0.344163	0.35277	0.37566
0.404102	0.384079	0.397789	0.395354	0.404203	0.399005	0.381712	0.398076	0.410789	0.40155	0.403578	0.404429	0.386607	0.385595	0.391027	0.384973	0.390026	0.404451	0.401397	0.387511	0.422159	0.375901	0.423019	0.38925	0.385725	0.391094	0.408621	0.39398	0.429934	0.39405	0.36809	0.419597	0.376894	0.397076	0.391675	0.413532	0.409898	0.388399	0.40478	0.3939	0.412966	0.386915	0.398898	0.379795	0.393331	0.403772	0.392447	0.384077	0.397851	0.423121
0.370339	0.320036	0.349282	0.32119	0.354864	0.370277	0.369489	0.314084	0.372296	0.374328	0.349638	0.358863	0.351868	0.333879	0.317292	0.324295	0.343315	0.368154	0.362184	0.353875	0.388376	0.316207	0.37318	0.349974	0.374599	0.323557	0.343324	0.38402	0.39205	0.359441	0.343386	0.359965	0.321146	0.348705	0.316113	0.397257	0.329325	0.322776	0.352081	0.331842	0.365507	0.354332	0.33949	0.332825	0.356355	0.348439	0.351346	0.323679	0.342684	0.381667
0.406349	0.373919	0.383419	0.371361	0.418947	0.418012	0.371455	0.360538	0.400563	0.396905	0.392605	0.388921	0.382143	0.369499	0.357432	0.352175	0.381218	0.410916	0.368736	0.395548	0.418637	0.356117	0.409077	0.359811	0.361542	0.383081	0.379952	0.415766	0.407758	0.382548	0.372467	0.395871	0.375934	0.38407	0.377038	0.423586	0.394866	0.39609	0.386585	0.370703	0.419746	0.3936	0.372803	0.371431	0.391225	0.383658	0.37982	0.354877	0.372253	0.422332
0.339493	0.273491	0.299644	0.306548	0.32693	0.322449	0.284912	0.310771	0.345626	0.354855	0.31809	0.332431	0.309613	0.290973	0.288727	0.302953	0.308893	0.335689	0.300061	0.334578	0.361882	0.284277	0.37558	0.278166	0.341833	0.315892	0.320954	0.350114	0.330261	0.306584	0.305979	0.337393	0.30153	0.324597	0.309744	0.355025	0.322574	0.300451	0.305936	0.306835	0.345548	0.314127	0.292043	0.310469	0.328696	0.314171	0.313331	0.296514	0.328934	0.347095
0.427798	0.29886	0.294062	0.337037	0.368294	0.354985	0.361324	0.414654	0.429646	0.351529	0.431364	0.435802	0.379014	0.340627	0.393321	0.201139	0.313585	0.419643	0.33653	0.427254	0.418207	0.357431	0.408964	0.318624	0.298447	0.364618	0.393621	0.326815	0.350837	0.404923	0.347022	0.447431	0.348905	0.406599	0.416321	0.392909	0.428141	0.385753	0.390229	0.360765	0.419175	0.322082	0.33961	0.401506	0.361574	0.394876	0.406917	0.364774	0.436002	0.410934
0.245751	0.118641	0.150832	0.267584	0.192438	0.053537	0.179996	0.138602	0.266149	0.175182	0.201385	0.241781	0.157893	0.238937	0.214538	0.229143	0.288928	0.234653	0.109623	0.282554	0.213676	0.298961	0.316969	0.0273682	0.375775	0.26473	0.204957	0.29901	0.192999	0.217126	0.226226	0.178155	0.221971	0.236246	0.180686	0.233542	0.176307	0.159292	0.130955	0.219189	0.249022	0.267022	0.240015	0.187116	0.278097	0.149637	0.213733	0.163872	0.187511	0.221812
0.372794	0.335738	0.322512	0.312165	0.346561	0.364285	0.352419	0.317015	0.351019	0.347308	0.374977	0.361399	0.352269	0.347536	0.30925	0.309471	0.347424	0.359718	0.32452	0.368183	0.379917	0.312205	0.38102	0.289344	0.32855	0.323147	0.325126	0.364089	0.369662	0.357937	0.340413	0.38013	0.295318	0.360505	0.318491	0.38529	0.326786	0.357156	0.324683	0.313027	0.37779	0.32666	0.331723	0.345711	0.350049	0.334118	0.341619	0.301615	0.350457	0.365606
0.475838	0.437379	0.43596	0.445345	0.460705	0.465749	0.453811	0.435336	0.465744	0.462781	0.480633	0.453763	0.441191	0.449769	0.454151	0.441458	0.458527	0.456009	0.451525	0.454982	0.457749	0.437838	0.450275	0.421839	0.456322	0.472098	0.464177	0.462494	0.469892	0.446145	0.464827	0.459028	0.454013	0.455733	0.432355	0.470852	0.447706	0.458695	0.429981	0.43626	0.471022	0.449967	0.463398	0.443979	0.466518	0.450351	0.454428	0.433413	0.43872	0.463361
0.482932	0.479153	0.477992	0.478706	0.488844	0.483343	0.487657	0.472305	0.481422	0.464382	0.478729	0.477257	0.481362	0.477646	0.472838	0.477888	0.477321	0.481507	0.48177	0.480701	0.483929	0.482669	0.486257	0.458037	0.479962	0.48171	0.472161	0.482796	0.485843	0.469771	0.486858	0.466338	0.488032	0.477865	0.483808	0.483524	0.485717	0.482017	0.486845	0.4758	0.48326	0.47822	0.485135	0.485932	0.480671	0.482133	0.485724	0.475776	0.473089	0.482472
0.512357	0.509965	0.500383	0.510266	0.515072	0.518886	0.515629	0.501	0.515352	0.486076	0.512043	0.50279	0.512922	0.503894	0.503159	0.522145	0.506177	0.515751	0.523144	0.513468	0.509556	0.513241	0.517423	0.476855	0.51119	0.52203	0.503181	0.518799	0.516336	0.497201	0.520908	0.491429	0.523605	0.501752	0.517267	0.517635	0.515757	0.511034	0.515816	0.507794	0.511128	0.510285	0.512673	0.509689	0.50591	0.51466	0.515399	0.508395	0.498182	0.511628
0.39898	0.362255	0.382539	0.361691	0.396843	0.397664	0.367265	0.35946	0.401201	0.382562	0.375578	0.382384	0.366019	0.362012	0.359433	0.384331	0.359492	0.384973	0.375618	0.384145	0.410426	0.362914	0.405303	0.32847	0.337928	0.405297	0.373112	0.376546	0.401588	0.382847	0.371659	0.3769	0.37354	0.371873	0.380078	0.420815	0.381176	0.376347	0.402676	0.378449	0.402129	0.368405	0.368279	0.373049	0.372805	0.395341	0.376565	0.373209	0.370516	0.409893
0.480404	0.481248	0.476814	0.485137	0.48425	0.482342	0.487328	0.481497	0.482615	0.467942	0.483186	0.474543	0.479722	0.475839	0.478041	0.494792	0.476592	0.483135	0.48794	0.478696	0.484371	0.48695	0.482917	0.459316	0.475656	0.486312	0.482669	0.487738	0.485825	0.468335	0.490717	0.462907	0.493749	0.479092	0.488499	0.479317	0.48546	0.4831	0.478564	0.47852	0.482609	0.481331	0.487844	0.482785	0.484609	0.484052	0.479434	0.479195	0.476364	0.484105
0.431545	0.369822	0.404136	0.398816	0.424119	0.43055	0.426642	0.413606	0.435938	0.414301	0.44486	0.436449	0.423347	0.4058	0.415532	0.37004	0.394635	0.44833	0.389267	0.429128	0.452385	0.409005	0.478021	0.393267	0.372429	0.435261	0.432397	0.386437	0.440241	0.409518	0.409742	0.443038	0.387653	0.423863	0.416365	0.438473	0.431007	0.419363	0.431643	0.404769	0.44926	0.394564	0.403609	0.388469	0.426417	0.459229	0.430961	0.400844	0.397504	0.444055
0.481042	0.474359	0.45899	0.459858	0.482835	0.464321	0.457754	0.458908	0.473265	0.468641	0.468519	0.474242	0.482436	0.477914	0.470957	0.444478	0.47238	0.46618	0.453796	0.481478	0.471412	0.460562	0.487517	0.431544	0.463137	0.446619	0.468183	0.460736	0.479411	0.473539	0.463966	0.472815	0.457228	0.47947	0.472885	0.476654	0.475451	0.463167	0.450804	0.448248	0.487367	0.481439	0.478026	0.463653	0.4738	0.459451	0.477397	0.457894	0.484118	0.464631
0.456697	0.457712	0.43603	0.443304	0.463438	0.443036	0.450653	0.44698	0.46078	0.458892	0.469369	0.451083	0.468062	0.428855	0.45223	0.413648	0.451128	0.458682	0.448737	0.452093	0.462054	0.432732	0.464524	0.441518	0.425961	0.439818	0.457374	0.429122	0.462763	0.437686	0.442092	0.450727	0.44056	0.448781	0.458481	0.457117	0.461271	0.460566	0.44887	0.438537	0.473386	0.446651	0.452292	0.45297	0.460532	0.445402	0.456137	0.443779	0.454114	0.45792
0.490482	0.399193	0.384736	0.434524	0.464328	0.447524	0.424737	0.471748	0.482974	0.445083	0.476944	0.481463	0.481224	0.425575	0.471382	0.345197	0.400615	0.469903	0.4078	0.479185	0.479898	0.42621	0.482771	0.400973	0.362004	0.415088	0.446443	0.414537	0.45237	0.487057	0.398985	0.503547	0.42528	0.460317	0.474549	0.463115	0.489058	0.470994	0.456399	0.432404	0.48884	0.408384	0.425444	0.467546	0.43178	0.470257	0.48427	0.438722	0.474376	0.479731
0.425118	0.403722	0.41045	0.403543	0.421492	0.424511	0.414259	0.403166	0.436419	0.439942	0.424858	0.428421	0.424247	0.399864	0.396201	0.379536	0.40246	0.431115	0.42427	0.41318	0.446778	0.389141	0.42475	0.409428	0.405277	0.388877	0.410764	0.423668	0.448421	0.421325	0.402987	0.432687	0.389945	0.412552	0.401588	0.441643	0.414309	0.406787	0.412759	0.408821	0.439125	0.41067	0.408315	0.399282	0.417079	0.422975	0.422449	0.399867	0.411493	0.446417
0.475718	0.471559	0.465132	0.459159	0.474071	0.487201	0.450484	0.475974	0.483073	0.490253	0.476925	0.489151	0.470738	0.463927	0.460035	0.470964	0.461383	0.472898	0.481025	0.469343	0.489614	0.441847	0.470786	0.46229	0.460286	0.454981	0.458971	0.461078	0.491037	0.486645	0.445778	0.491858	0.446695	0.471256	0.465109	0.481599	0.476712	0.473202	0.464754	0.464355	0.48072	0.462251	0.466634	0.466932	0.471763	0.479886	0.474192	0.4577	0.469353	0.48921
0.480694	0.467898	0.467772	0.467094	0.48241	0.496251	0.473874	0.465574	0.487555	0.486445	0.492441	0.486399	0.480393	0.466493	0.467233	0.465036	0.467694	0.487523	0.468986	0.470214	0.49684	0.465376	0.485517	0.476566	0.461095	0.478404	0.477675	0.474597	0.495938	0.486177	0.460242	0.49202	0.4535	0.477442	0.464887	0.488258	0.481793	0.469808	0.468364	0.473191	0.484818	0.467092	0.475403	0.482707	0.477098	0.476612	0.4763	0.462298	0.473751	0.49681
0.47211	0.459722	0.464196	0.466983	0.471901	0.466326	0.463567	0.469861	0.486214	0.489651	0.48717	0.482598	0.470757	0.456125	0.464006	0.455115	0.46959	0.485754	0.466132	0.465544	0.496996	0.449139	0.471845	0.48399	0.453976	0.448769	0.476679	0.469662	0.484983	0.472251	0.455462	0.48712	0.461677	0.473651	0.464267	0.473638	0.483282	0.471128	0.46783	0.464404	0.485264	0.464785	0.463229	0.470171	0.469686	0.474044	0.470334	0.465895	0.477661	0.488235
0.465744	0.461152	0.454579	0.445589	0.477058	0.48637	0.445236	0.466857	0.47351	0.478936	0.462556	0.475471	0.458316	0.459784	0.454804	0.438254	0.456445	0.463611	0.45482	0.457635	0.492024	0.430889	0.455696	0.455997	0.449359	0.45603	0.45551	0.460917	0.484775	0.474718	0.427072	0.482501	0.442353	0.46315	0.460328	0.476781	0.473688	0.467157	0.46015	0.451954	0.465714	0.455194	0.454797	0.455478	0.468359	0.462317	0.457009	0.44364	0.458361	0.476697
0.437019	0.419856	0.417477	0.410105	0.436733	0.442512	0.435863	0.433988	0.43389	0.439384	0.437486	0.437534	0.443674	0.430506	0.41552	0.407635	0.423689	0.43408	0.421183	0.426134	0.453014	0.394257	0.435758	0.451486	0.430126	0.413894	0.426839	0.446074	0.457466	0.452516	0.418074	0.447097	0.4001	0.431163	0.410534	0.444142	0.436531	0.422426	0.437931	0.410519	0.443602	0.428921	0.418927	0.422135	0.433932	0.422329	0.429606	0.420533	0.431727	0.450057
0.463458	0.442754	0.440806	0.438723	0.457058	0.456015	0.439065	0.450143	0.463549	0.472986	0.462566	0.46093	0.45127	0.443196	0.444042	0.429884	0.441637	0.471846	0.450662	0.449867	0.476021	0.425155	0.450567	0.449889	0.438746	0.43176	0.456265	0.453346	0.471879	0.459562	0.433863	0.466929	0.440496	0.449332	0.436041	0.463759	0.463233	0.44637	0.438565	0.443774	0.468461	0.440985	0.450898	0.436932	0.454825	0.443729	0.452429	0.436099	0.443073	0.468721
0.49537	0.465894	0.500447	0.487437	0.494842	0.487896	0.486751	0.476003	0.505141	0.505931	0.479914	0.485767	0.469532	0.490946	0.468326	0.465504	0.48261	0.480771	0.499843	0.489703	0.515696	0.478525	0.485323	0.48744	0.512618	0.460906	0.479004	0.492822	0.510243	0.490658	0.475994	0.488339	0.463164	0.493039	0.475666	0.497655	0.48968	0.482198	0.487619	0.478338	0.496554	0.489733	0.485655	0.465725	0.491267	0.485311	0.493365	0.465603	0.47897	0.504006
0.34874	0.302299	0.347522	0.28222	0.317932	0.329666	0.328632	0.254754	0.368588	0.381907	0.313443	0.339741	0.328297	0.280267	0.276227	0.280996	0.312794	0.347799	0.383217	0.317747	0.380561	0.275079	0.344456	0.324386	0.340668	0.267377	0.322258	0.35282	0.384377	0.341457	0.297614	0.321289	0.285816	0.307168	0.296205	0.387635	0.299062	0.292077	0.309901	0.32112	0.34976	0.344298	0.298819	0.287876	0.332414	0.341771	0.336153	0.290432	0.309347	0.371186
0.340577	0.354285	0.327801	0.321282	0.344176	0.363017	0.336514	0.342476	0.359729	0.3708	0.353081	0.343583	0.354628	0.324557	0.296634	0.300411	0.3191	0.355537	0.379434	0.323297	0.372711	0.305654	0.346709	0.338636	0.329688	0.341367	0.327024	0.357443	0.386255	0.338726	0.332875	0.357938	0.292867	0.334969	0.322794	0.375932	0.344774	0.334696	0.338656	0.321291	0.364117	0.330952	0.336863	0.303182	0.334376	0.344204	0.336732	0.327309	0.326457	0.379648
0.501689	0.465984	0.480081	0.501553	0.499543	0.45245	0.498267	0.487653	0.509298	0.504987	0.50309	0.495032	0.492293	0.4672	0.484197	0.467199	0.494095	0.515061	0.477323	0.489508	0.525211	0.486383	0.498825	0.499482	0.470465	0.462819	0.517386	0.492166	0.495258	0.473964	0.497871	0.499423	0.49054	0.502758	0.482309	0.485541	0.509487	0.499575	0.494416	0.501662	0.509281	0.489329	0.495842	0.485633	0.491967	0.496945	0.499399	0.49155	0.497171	0.509932
0.500638	0.476682	0.486184	0.492402	0.491534	0.496669	0.481151	0.498	0.497277	0.513126	0.505344	0.504287	0.498903	0.485766	0.486661	0.482066	0.485585	0.497334	0.483181	0.486253	0.506147	0.462901	0.494084	0.507331	0.488599	0.4767	0.489891	0.493941	0.514858	0.503128	0.473739	0.512131	0.473564	0.492139	0.485975	0.498152	0.498863	0.493884	0.493074	0.485094	0.50193	0.491915	0.492001	0.490949	0.490606	0.499474	0.496742	0.483616	0.494454	0.51092
0.484965	0.445376	0.453822	0.456698	0.480025	0.49255	0.460811	0.469052	0.487248	0.49068	0.474988	0.490942	0.475749	0.464252	0.461372	0.438937	0.46248	0.481636	0.456689	0.484292	0.495567	0.438775	0.478134	0.453919	0.452766	0.452774	0.461358	0.461815	0.497717	0.496786	0.447418	0.500643	0.437758	0.468927	0.459189	0.495779	0.471307	0.466096	0.464998	0.455361	0.484015	0.457854	0.465979	0.473252	0.472475	0.480192	0.473055	0.450175	0.478896	0.497701
0.462106	0.43998	0.443349	0.460195	0.464759	0.451881	0.445483	0.469102	0.471709	0.480361	0.46804	0.469271	0.461028	0.443358	0.455543	0.438579	0.455482	0.466428	0.458887	0.462931	0.481488	0.43407	0.45467	0.450559	0.439799	0.421335	0.452711	0.458345	0.475655	0.455481	0.437883	0.48219	0.443535	0.457053	0.456405	0.459521	0.465887	0.461389	0.454477	0.450074	0.483658	0.450127	0.456279	0.438286	0.462699	0.457331	0.466136	0.445846	0.456827	0.476363
0.460669	0.436566	0.440803	0.449402	0.459761	0.455139	0.44812	0.467686	0.469087	0.470023	0.463552	0.47194	0.449451	0.451449	0.448062	0.447729	0.452503	0.459643	0.441431	0.461059	0.476919	0.43346	0.455584	0.456952	0.448311	0.428496	0.453625	0.462064	0.46502	0.473109	0.433105	0.481426	0.442939	0.464465	0.449041	0.462203	0.459118	0.4614	0.440644	0.438962	0.474335	0.447054	0.450016	0.454614	0.457317	0.461372	0.45137	0.436643	0.466907	0.474355
0.348145	0.214598	0.20527	0.291036	0.331507	0.323864	0.297059	0.332051	0.326676	0.281845	0.353667	0.359554	0.311258	0.305183	0.307632	0.136188	0.230552	0.319283	0.229037	0.367477	0.358536	0.278286	0.339656	0.2037	0.200624	0.294715	0.296062	0.260253	0.31666	0.367164	0.266379	0.367442	0.251639	0.31976	0.321872	0.344595	0.335376	0.304498	0.300831	0.246646	0.373934	0.249502	0.29856	0.335739	0.289048	0.35136	0.330359	0.252287	0.328074	0.352659
0.252632	0.158017	0.125466	0.172079	0.215952	0.218877	0.177473	0.249836	0.245078	0.180361	0.232717	0.26681	0.198429	0.19378	0.210926	0.0588383	0.161109	0.210365	0.147297	0.256147	0.243751	0.172467	0.222187	0.180217	0.133167	0.188353	0.213484	0.182977	0.204306	0.247522	0.178576	0.274261	0.179915	0.214067	0.203351	0.227192	0.235166	0.199707	0.21589	0.181309	0.25722	0.160403	0.178483	0.239823	0.198532	0.235938	0.237665	0.164318	0.239272	0.255711
0.436552	0.304891	0.281984	0.345821	0.392749	0.381749	0.353212	0.449723	0.449188	0.347231	0.431683	0.454118	0.365203	0.367191	0.39715	0.202435	0.308434	0.403773	0.324643	0.454634	0.426062	0.366568	0.390834	0.324587	0.268078	0.343954	0.409103	0.331338	0.358423	0.43055	0.33029	0.478083	0.3426	0.424126	0.413681	0.402249	0.434226	0.389734	0.392587	0.359076	0.444228	0.313605	0.340692	0.430813	0.360108	0.426989	0.399618	0.345013	0.452227	0.430265
0.407324	0.269351	0.245464	0.319709	0.357751	0.330579	0.338917	0.428162	0.428859	0.32581	0.404969	0.440323	0.358357	0.318024	0.400835	0.188122	0.295321	0.395826	0.304733	0.41753	0.410675	0.335511	0.368762	0.301603	0.226292	0.338954	0.407198	0.285948	0.329399	0.395319	0.319992	0.452473	0.315354	0.405467	0.416564	0.387457	0.428774	0.37659	0.379121	0.370183	0.413969	0.290957	0.318415	0.428439	0.344881	0.424273	0.401884	0.357041	0.41408	0.437814
0.443961	0.393287	0.38527	0.39173	0.431853	0.429292	0.410244	0.427265	0.449361	0.42645	0.438509	0.451748	0.427319	0.410573	0.410159	0.354737	0.37601	0.433299	0.389472	0.446769	0.447736	0.397963	0.433237	0.384337	0.36808	0.381437	0.426983	0.420522	0.430142	0.451012	0.383644	0.469495	0.390541	0.425893	0.422624	0.448103	0.440538	0.419616	0.428002	0.388949	0.433302	0.396485	0.399607	0.424364	0.418588	0.432576	0.428194	0.390945	0.444453	0.450553
[truncated: 357 more columns]

## Sheet: GSVA
Tag	TCGA-CD-8529-01	TCGA-CG-4443-01	TCGA-BR-7197-01	TCGA-D7-A6EV-01	TCGA-ZA-A8F6-01	TCGA-RD-A8N2-01	TCGA-IN-8462-01	TCGA-D7-A4YX-01	TCGA-BR-7716-01	TCGA-BR-8373-01	TCGA-CG-4301-01	TCGA-FP-7916-01	TCGA-RD-A8N5-01	TCGA-CD-8534-01	TCGA-CG-4469-01	TCGA-BR-8295-01	TCGA-VQ-A91V-01	TCGA-BR-7901-01	TCGA-CG-5725-01	TCGA-HU-A4HB-01	TCGA-BR-6456-01	TCGA-R5-A7ZR-01	TCGA-D7-6818-01	TCGA-IN-8663-01	TCGA-CD-8533-01	TCGA-BR-4294-01	TCGA-VQ-A8PK-01	TCGA-RD-A8N6-01	TCGA-BR-7957-01	TCGA-D7-8574-01	TCGA-IN-A6RN-01	TCGA-FP-7998-01	TCGA-HU-A4GH-01	TCGA-VQ-AA6F-01	TCGA-CG-4436-01	TCGA-BR-6457-01	TCGA-CG-4465-01	TCGA-BR-4267-01	TCGA-HU-A4GQ-01	TCGA-HU-A4H3-01	TCGA-HF-7133-01	TCGA-B7-A5TJ-01	TCGA-HU-A4GP-01	TCGA-KB-A93J-01	TCGA-VQ-A927-01	TCGA-BR-6455-01	TCGA-F1-A448-01	TCGA-SW-A7EA-01	TCGA-VQ-AA6J-01
N_GLYCAN_BIOSYNTHESIS	0.364474	0.194283	-0.208302	0.392341	-0.518451	-0.645933	-0.633004	0.337023	0.434886	0.196515	-0.121767	0.00456909	-0.375611	-0.505419	-0.369484	-0.429531	0.362029	0.322251	0.319292	-0.33203	0.0881355	0.304637	0.504815	0.0207355	-0.0936931	0.26898	-0.0346916	-0.0273634	-0.222232	-0.448909	-0.27202	0.0972305	-0.204025	0.0178136	0.341759	0.0175457	0.364515	0.229158	-0.149804	-0.364447	0.563386	0.100854	0.0422467	0.205917	-0.36888	0.394236	0.0119974	-0.434107	0.0159965
OTHER_GLYCAN_DEGRADATION	0.593526	0.208815	0.431484	0.0328284	0.188639	-0.733613	-0.646934	0.383507	0.59472	0.319255	0.18171	0.489776	0.23789	-0.678284	0.214404	-0.776432	0.356078	0.164104	0.0495315	0.49929	0.388725	0.0884849	0.39947	0.109815	-0.0476241	0.109452	0.357245	-0.371987	-0.0190475	0.102842	0.206749	0.641564	0.175718	-0.358553	0.0430369	0.269888	0.549713	0.273389	-0.239033	0.346143	0.613949	0.264051	-0.577479	0.603101	-0.309683	0.366213	0.101249	-0.514872	0.123364
O_GLYCAN_BIOSYNTHESIS	0.423072	-0.439755	-0.391592	-0.207448	0.166299	-0.388716	-0.00455242	0.000225201	0.562954	0.203883	0.460172	0.21712	0.299818	-0.366131	-0.375023	-0.544292	0.0830586	0.302077	-0.287744	0.0993864	0.194272	0.0969789	0.0366103	-0.228642	-0.296931	0.0141531	0.0438666	-0.433769	0.460047	-0.142158	0.193414	0.0688736	-0.155346	0.142777	-0.044521	0.160845	0.228484	0.246344	-0.00721305	-0.291763	0.575654	0.177976	0.147553	0.14828	0.492777	-0.0710961	0.284096	-0.143426	-0.183056
GLYCOSAMINOGLYCAN_DEGRADATION	0.715333	0.0626712	-0.167376	-0.198214	-0.0477596	-0.494439	-0.279667	-0.0446036	0.6733	0.231779	-0.277002	0.208653	0.431139	-0.572976	-0.331632	-0.48381	0.174654	0.635636	0.292702	0.168794	0.518316	0.13452	0.60084	-0.18796	-0.377578	-0.257734	-0.157071	-0.646954	-0.113719	0.023819	-0.0674281	0.43158	-0.0832236	-0.318907	-0.0975175	0.53271	0.206909	0.324662	0.144754	0.140853	0.634615	-0.213141	-0.381381	0.480483	0.0232646	0.0337133	0.270267	-0.382559	0.0354675
GLYCOSAMINOGLYCAN_BIOSYNTHESIS_KERATAN_SULFATE	0.677176	-0.395353	-0.270647	0.169234	-0.0519463	-0.458424	-0.38957	-0.29386	0.642918	0.209344	0.025636	0.0943046	0.106538	-0.753742	-0.421427	-0.172788	-0.186567	0.594233	-0.0300512	-0.179735	0.393441	-0.161663	0.398155	-0.218155	-0.471618	-0.235358	0.146239	-0.464869	0.345372	-0.299417	-0.119589	0.0539341	0.062384	0.200996	-0.380306	0.426624	0.115266	0.319258	-0.277834	-0.595706	0.669256	0.265101	-0.193382	0.208447	-0.0156533	0.307733	0.299886	-0.440911	0.0974505
GLYCEROLIPID_METABOLISM	0.186785	-0.122613	-0.039718	0.165974	0.355684	-0.293732	-0.428654	-0.181512	0.617905	0.156823	0.0265384	-0.105347	-0.0482366	-0.38815	-0.0521488	-0.286883	-0.0388994	0.0644403	-0.142597	0.173027	0.406265	0.301451	0.150943	-0.207877	-0.38272	-0.0902834	-0.0735152	-0.343045	0.168737	-0.243919	0.017482	-0.0929246	-0.183207	0.227632	0.200176	0.140075	0.383005	0.0575295	-0.16826	-0.269164	0.398689	0.103084	0.148161	0.204255	0.165593	0.207352	0.0354794	-0.2759	0.230285
GLYCOSYLPHOSPHATIDYLINOSITOL_GPI_ANCHOR_BIOSYNTHESIS	0.0561197	0.415293	0.128329	0.353425	-0.0362156	-0.616031	-0.496642	0.0967494	0.104584	-0.0963295	-0.0906822	0.232628	-0.550265	-0.402156	-0.121813	-0.384033	0.244241	0.243396	0.425823	-0.223088	0.132572	0.214992	0.294853	0.0693281	0.531059	0.458473	-0.0954678	0.0238574	-0.459309	-0.426722	-0.067544	-0.178845	0.335938	0.185328	0.474886	-0.346966	0.211108	-0.0349271	0.152515	-0.31552	0.399096	0.0922924	-0.144044	0.413229	-0.317265	0.524711	-0.347956	-0.363603	0.4463
GLYCEROPHOSPHOLIPID_METABOLISM	0.191396	-0.0700336	-0.100683	0.232309	0.321116	-0.367586	-0.324264	0.0534851	0.399544	0.206908	-0.229031	-0.0643039	-0.136713	-0.382035	-0.0488885	-0.478293	0.0648946	-0.0319322	-0.0546728	0.126031	0.273108	-0.114936	0.00940143	-0.0626791	-0.257399	-0.24799	-0.138056	-0.231101	0.10785	-0.228476	-0.146987	-0.0283283	-0.141487	-0.16108	-0.000901893	0.0573665	0.0824816	-0.169078	-0.152742	-0.192039	0.162415	0.379604	-0.152886	0.175634	0.143232	0.17426	-0.134899	-0.210035	0.125552
ETHER_LIPID_METABOLISM	0.289728	-0.0793609	-0.292162	-0.00942624	0.325643	-0.351874	-0.00887796	-0.0637153	0.394555	0.0725648	-0.0869926	0.000226385	-0.032778	-0.451034	0.0183718	-0.409775	-0.154828	0.101091	-0.3413	0.13886	0.169979	-0.0445936	-0.138099	-0.218224	-0.398841	-0.305563	-0.233441	-0.161597	0.246769	-0.062036	0.094124	0.132763	-0.0992147	-0.212961	-0.0581854	0.00355371	0.181985	-0.256994	-0.176462	-0.290676	0.174919	0.118891	-0.38893	0.10945	0.405984	0.070599	0.0149502	-0.354481	-0.19476
ARACHIDONIC_ACID_METABOLISM	0.430047	-0.224292	-0.338613	-0.0792868	0.45265	-0.325317	0.194422	-0.3088	0.382479	-0.0403768	0.00766325	-0.161325	0.060739	-0.428559	-0.207592	-0.495613	-0.12252	0.206192	-0.0909094	0.260127	0.261665	0.030396	0.16295	-0.468637	-0.468703	-0.0229752	-0.0376718	-0.167157	0.0146691	0.083538	0.080923	-0.139144	-0.185527	-0.0874633	0.0258268	0.130459	-0.0232658	-0.185547	-0.204673	-0.269571	0.223212	0.170886	-0.361909	-0.162508	0.129391	-0.0771522	-0.116373	-0.340898	-0.150519
LINOLEIC_ACID_METABOLISM	0.352052	-0.074599	-0.389285	0.243019	0.445348	-0.278571	-0.00927736	0.0417436	0.166288	0.0188515	0.116451	-0.226214	0.111092	-0.182821	0.246171	-0.458613	0.192242	0.0472311	-0.154373	0.425646	-0.384378	0.0984855	-0.371894	-0.475952	-0.171184	-0.00740091	0.19012	-0.137956	-0.319223	-0.219049	0.442508	-0.385496	0.16111	0.0825645	0.107811	-0.181317	0.0774772	-0.222953	-0.154512	-0.00833422	0.0566203	0.158664	0.0347048	0.0552879	0.457856	-0.158368	-0.0474594	-0.391936	-0.337581
ALPHA_LINOLENIC_ACID_METABOLISM	0.438425	0.369825	-0.340894	0.082648	0.557298	-0.228401	0.0977102	-0.123784	-0.0577774	-0.0421528	-0.376993	-0.182581	-0.0607787	-0.442393	-0.253216	-0.377429	-0.038733	-0.0186661	0.162064	0.219982	-0.0615577	-0.0602968	-0.128801	-0.287122	-0.3894	-0.239137	0.0494125	-0.0236561	0.00763932	0.143039	0.296723	-0.0946447	0.0330819	-0.158535	-0.0389209	-0.0676805	-0.105911	-0.275394	-0.121931	-0.142315	0.100384	0.14237	-0.304542	0.0537032	0.346407	0.162373	0.159683	-0.441998	-0.308914
SPHINGOLIPID_METABOLISM	0.337753	-0.0571734	-0.134428	0.133731	0.270248	-0.554999	-0.334319	0.15265	0.514671	0.360125	0.160706	0.25637	-0.165997	-0.539701	-0.10822	-0.350236	0.107273	0.23969	-0.0968892	0.374084	0.40923	0.174709	0.165036	-0.078054	-0.302789	0.110248	-0.0634926	-0.449765	0.214907	-0.308477	-0.114584	0.493936	0.109057	0.0989438	-0.0193627	0.251271	0.523935	0.190564	0.054425	-0.0807115	0.408708	0.0316394	-0.146221	0.421896	-0.019616	0.321331	-0.159096	-0.129592	-0.00669675
GLYCOSPHINGOLIPID_BIOSYNTHESIS_LACTO_AND_NEOLACTO_SERIES	0.43733	-0.341453	-0.227356	0.292071	-0.0800089	-0.420199	-0.109218	-0.318648	0.535009	-0.0812174	0.213025	0.146483	0.238596	-0.250919	-0.466512	-0.163948	0.0670324	0.28268	-0.14827	0.0450206	0.308686	0.176413	0.303991	-0.198648	-0.35455	-0.349137	0.0957989	-0.389904	0.0640529	-0.359066	0.0887357	-0.203622	0.0650837	0.123536	-0.0906265	0.121872	0.164776	0.57743	-0.30829	-0.288257	0.581009	0.236071	0.167546	0.14201	-0.0793997	0.146325	0.0833556	-0.216881	-0.274982
GLYCOSPHINGOLIPID_BIOSYNTHESIS_GLOBO_SERIES	0.672532	-0.28786	0.263849	-0.374772	-0.0476015	-0.525513	-0.351064	-0.0524801	0.678277	0.207025	0.483251	0.493919	0.540266	-0.552742	-0.551263	-0.540701	-0.609343	0.54913	-0.0726564	0.103831	0.516824	-0.120679	0.604393	-0.0841226	-0.374775	-0.187994	0.169803	-0.555989	0.359371	-0.196849	-0.138046	0.435187	-0.0997023	-0.292882	-0.259102	0.489838	0.146839	0.00777332	-0.337261	-0.347352	0.559197	-0.381372	-0.633748	0.0763839	-0.259032	0.146098	-0.0561023	-0.409812	0.218426
GLYCOSPHINGOLIPID_BIOSYNTHESIS_GANGLIO_SERIES	0.573518	0.112303	0.0109131	-0.437331	0.215619	-0.189014	-0.557623	-0.284482	0.641386	0.355484	0.210259	0.337413	0.563373	-0.551617	-0.62209	-0.337177	-0.161092	0.545948	0.0453124	0.269631	0.634353	-0.105948	0.433137	-0.154339	-0.284717	0.320879	0.218669	-0.244901	0.32389	0.484575	-0.0463144	0.583189	-0.358304	-0.237234	-0.531225	0.582698	0.0835242	0.0128636	-0.369218	-0.333141	0.612838	-0.104341	-0.53161	0.059341	-0.255954	-0.186703	0.421192	-0.37411	0.276959
RIBOFLAVIN_METABOLISM	-0.131955	-0.325801	-0.153008	0.019813	-0.14171	-0.391776	-0.529351	0.398429	0.160769	-0.00224307	0.0958613	0.3127	-0.235319	-0.255328	0.0125408	-0.137939	0.274367	0.0372304	-0.0824872	-0.100076	-0.0317266	0.163638	0.303528	-0.243327	0.558078	0.257448	-0.050556	-0.339705	-0.0929148	-0.411546	-0.190278	0.0940461	0.00620917	-0.498899	0.235512	-0.238941	0.249207	-0.0941792	0.100616	-0.146802	0.578826	0.373622	-0.184802	0.00991009	-0.35043	0.156762	-0.249076	0.39093	0.172716
NICOTINATE_AND_NICOTINAMIDE_METABOLISM	-0.0868518	-0.295338	-0.198243	-0.127585	0.168228	-0.191876	-0.331841	-0.011746	0.274538	0.0981584	0.0072574	0.0751496	-0.0701417	-0.27466	-0.0314408	-0.636811	0.0822589	0.189682	-0.323509	0.391908	0.323663	0.0996054	0.141352	-0.155729	-0.0140153	0.0455724	0.0235842	-0.445074	0.274212	-0.248336	-0.16474	0.109276	-0.0373699	0.288424	0.0411452	0.194315	0.31831	-0.232298	0.182041	0.049	0.294502	0.0416661	-0.297538	0.0711175	0.118238	0.147569	-0.108218	-0.123738	0.295204
PANTOTHENATE_AND_COA_BIOSYNTHESIS	0.155665	-0.0997571	-0.370059	0.0153734	0.20313	-0.54612	-0.570459	0.34223	0.334385	0.0856716	-0.180445	0.17598	-0.260022	-0.345337	-0.0734654	-0.221915	0.117953	0.318578	-0.261679	0.363776	0.255949	-0.114495	0.445659	-0.33511	0.187128	-0.353202	0.139937	-0.0858879	0.00878616	-0.242077	-0.245586	0.185666	0.287556	-0.126336	-0.0517133	-0.106029	0.44579	-0.408593	0.0500537	-0.00756193	0.352635	-0.239703	-0.291416	0.0322869	-0.375685	0.311999	-0.153529	0.0385521	0.1062
AMINOACYL_TRNA_BIOSYNTHESIS	-0.23009	0.116848	-0.0352349	0.661092	-0.553322	-0.724961	-0.742525	0.733266	0.336228	-0.497042	-0.0125814	-0.325432	-0.600295	-0.620447	0.243378	-0.0505155	0.330333	-0.536659	0.0266817	-0.32873	-0.0553036	0.265736	-0.132687	0.232708	-0.18453	-0.0314298	-0.230078	-0.450361	0.0478566	-0.74748	-0.586974	-0.191274	-0.497986	0.00736045	0.613557	-0.420908	0.602579	0.270895	0.40663	-0.20899	0.548069	0.378781	-0.20664	-0.00302668	-0.344579	0.719959	-0.403414	0.100146	0.258488
BASAL_TRANSCRIPTION_FACTORS	-0.180212	-0.0884926	-0.100666	0.265513	-0.507922	-0.427085	-0.420136	0.442713	0.23567	-0.100978	0.0830098	-0.0163861	-0.57583	-0.48371	0.296991	-0.0983441	0.12702	-0.220941	0.252537	-0.0669778	0.124799	-0.18132	-0.35133	0.302432	0.101985	-0.349712	-0.0341258	-0.067087	0.00344719	-0.46385	-0.320581	-0.159613	-0.276513	-0.183945	0.460685	-0.467432	0.424852	-0.0311777	0.242319	0.0771299	0.305003	0.00917793	0.102423	0.16187	-0.587647	0.427539	-0.325817	-0.00866429	-0.192985
NON_HOMOLOGOUS_END_JOINING	-0.295437	0.0417761	-0.0345657	0.490832	-0.400689	-0.535988	-0.736927	0.604337	0.261503	0.0427975	-0.230505	-0.138709	-0.342724	-0.149694	0.594441	-0.696085	0.148003	-0.456314	-0.132977	0.333249	0.43166	-0.151647	-0.138227	0.622924	0.289102	-0.320152	-0.366126	-0.186781	-0.0450841	-0.447115	-0.425493	0.281394	0.122143	-0.00655286	0.415527	-0.582009	0.319788	-0.149659	0.129234	0.107794	0.331483	0.316312	-0.316406	0.340521	-0.0890925	0.48849	-0.60943	0.0887338	0.431388
SNARE_INTERACTIONS_IN_VESICULAR_TRANSPORT	0.33085	-0.181813	-0.451965	0.0552264	-0.115034	-0.36419	-0.4853	0.185549	0.379094	-0.13554	0.31202	0.108359	-0.225866	-0.279286	0.177229	-0.619419	0.258991	0.0205712	-0.126649	0.375855	0.308553	-0.464859	0.0404108	0.102781	-0.18528	0.105638	-0.0554955	-0.0585057	-0.310276	-0.207473	-0.347364	0.279254	-0.0869256	-0.0423453	0.357469	-0.0921381	0.291217	-0.0173639	0.0316229	-0.103218	0.415429	0.013317	-0.303033	0.478745	0.0922416	0.110055	-0.227328	0.200842	0.0895834
LYSOSOME	0.541615	-0.0891102	-0.121537	-0.172171	0.345802	-0.534511	-0.485113	0.273804	0.602273	0.0796902	0.175677	0.429622	0.173678	-0.515107	-0.161951	-0.53148	0.0312356	0.402727	0.0384239	0.355639	0.580868	-0.0967014	0.481996	-0.0870912	-0.362042	0.00553146	0.238629	-0.408406	-0.100748	-0.226683	-0.251716	0.498468	-0.136226	-0.133957	-0.104563	0.381509	0.414421	0.1739	-0.157681	-0.0117893	0.53	-0.0230771	-0.443911	0.596431	-0.303031	0.268313	0.0588223	-0.20879	0.273319
CARDIAC_MUSCLE_CONTRACTION	-0.343183	-0.238239	-0.342649	-0.0879009	0.0946772	0.0257166	0.0409431	-0.185316	0.143022	-0.365072	0.0441219	-0.377659	-0.128415	-0.188468	-0.27909	-0.171002	-0.229737	-0.094531	0.0732425	-0.0250569	0.125604	0.27438	0.373428	-0.417984	-0.322808	-0.000291435	-0.167252	-0.15271	0.11531	-0.457939	0.269328	-0.462055	-0.0869517	-0.13897	0.00352742	0.27559	0.0955377	-0.0269731	0.161617	0.070929	0.0662902	0.0178414	0.226862	-0.0156176	-0.197753	-0.153046	0.173042	0.169076	-0.269198
RENIN_ANGIOTENSIN_SYSTEM	0.317723	-0.459144	-0.141096	-0.305487	0.664374	-0.0311189	-0.312107	-0.147602	0.535425	0.174688	0.117973	0.0279037	-0.151041	-0.334299	-0.185942	-0.452589	-0.262427	0.197618	-0.165348	0.514732	0.679488	0.136035	0.391549	-0.555577	0.36382	0.123166	-0.116702	-0.32969	0.451567	-0.050268	-0.457699	-0.0175169	-0.128451	-0.0230064	0.0838511	0.357388	0.267294	-0.27086	0.267897	-0.24505	0.519497	-0.0164352	-0.169764	-0.134179	0.1417	-0.112306	0.323281	-0.395482	-0.222825
CIRCADIAN_RHYTHM_MAMMAL	0.517345	-0.314877	0.156933	-0.116084	-0.296286	-0.105604	0.0501392	-0.144474	0.130817	0.359557	0.12135	0.528729	-0.261571	-0.668832	0.00485324	-0.739635	0.388294	0.5304	0.0117971	-0.258025	0.552546	-0.544438	-0.0882863	0.327806	-0.635076	-0.332679	0.639728	0.510237	0.427466	-0.0794647	0.253107	0.395131	0.480927	-0.543361	-0.301442	0.197832	-0.270776	0.0281679	-0.138154	0.0140679	-0.11649	0.196121	0.332882	0.436105	0.277632	0.354655	-0.1585	-0.629423	0.0742473
TASTE_TRANSDUCTION	-0.00143919	0.134801	0.0988434	-0.200272	0.0835982	0.271135	-0.102766	-0.311081	0.128779	0.0480605	0.0107629	0.237983	0.0475823	-0.0585936	0.104632	-0.292452	-0.0324871	-0.172402	0.018031	0.0759508	-0.177598	-0.0755113	0.0143641	-0.123185	0.308886	-0.198177	0.298679	0.195034	0.0807076	0.277584	-0.177713	0.187681	0.127073	0.154629	-0.387818	0.0769671	-0.208512	-0.301232	-0.358335	-0.0769035	0.236576	0.173068	-0.159372	0.145801	0.297741	-0.125466	0.35588	-0.287021	0.195618
PROXIMAL_TUBULE_BICARBONATE_RECLAMATION	0.218722	0.0188307	-0.126655	0.29617	0.18921	-0.12512	-0.392305	-0.209125	0.523356	-0.0675468	0.176154	-0.342015	-0.51566	-0.411696	-0.40964	-0.411139	-0.103406	0.214102	0.00441276	0.393196	0.276624	0.405755	0.214483	-0.416941	-0.00517365	0.436208	0.240999	-0.293434	0.063607	-0.495973	0.0391392	-0.264858	-0.41683	0.290717	0.205317	0.275749	0.263708	0.27884	0.151761	-0.00727248	0.403117	0.0350639	0.0778553	-0.251677	0.0885779	0.314523	-0.459886	-0.417167	0.183864
PATHOGENIC_ESCHERICHIA_COLI_INFECTION	0.0637965	-0.55295	-0.242613	0.228271	-0.181357	-0.274715	-0.166588	0.117871	0.565689	-0.261704	0.115763	0.357081	-0.135925	-0.550796	0.0818972	-0.341289	-0.135854	-0.057819	0.0104968	0.0347512	0.527559	0.140229	0.126007	0.0427142	-0.296506	-0.364209	0.0372158	-0.450646	0.116418	-0.370007	-0.28812	0.0972917	-0.232842	-0.122913	0.110862	-0.0378805	0.389178	-0.148318	0.191201	0.127171	0.368322	0.0831048	0.0812031	-0.133636	-0.317662	0.309989	-0.0987474	0.246284	0.0781722
SYSTEMIC_LUPUS_ERYTHEMATOSUS	0.327737	-0.46251	-0.12734	0.132835	-0.21739	-0.432467	0.195108	0.225368	0.558683	-0.476182	-0.169945	0.360285	-0.423317	-0.494774	-0.137974	-0.128831	-0.0699035	0.0229011	-0.0108364	0.33454	0.169641	0.227345	0.602768	-0.392727	-0.398816	-0.335248	-0.344758	-0.253324	-0.304599	-0.317055	0.0551445	0.0684355	-0.130724	0.248322	0.0121582	0.199573	0.140991	-0.0677828	0.107573	-0.212809	0.344461	-0.0586601	0.127972	0.114276	-0.505837	0.547382	-0.0919278	0.297689	0.0454823
PRIMARY_IMMUNODEFICIENCY	0.597381	-0.683091	-0.585814	-0.502228	-0.39438	-0.353509	-0.555439	0.440853	0.65309	-0.358364	-0.326382	0.666941	-0.614837	-0.328823	-0.320239	-0.68371	-0.607297	0.00370874	-0.329611	0.744409	0.439479	-0.367203	-0.272165	-0.477006	-0.503835	-0.646731	-0.430815	-0.612224	-0.405161	0.534423	-0.572571	0.681048	-0.547782	0.374323	-0.0395523	0.393672	-0.311841	-0.366243	-0.387741	-0.458554	0.606606	-0.509874	-0.539623	0.305576	-0.257778	0.46834	0.168659	-0.351192	0.642719
HYPERTROPHIC_CARDIOMYOPATHY_HCM	0.325177	-0.314011	-0.263025	-0.260806	0.403812	0.409672	0.0503762	-0.356468	0.407351	0.196405	0.24485	0.364309	0.170941	-0.368216	-0.362416	-0.383395	-0.330121	0.423552	-0.276016	-0.260567	0.540007	-0.382988	0.34604	-0.0973824	-0.34685	-0.231095	0.0923128	0.00999319	0.445969	-0.10096	-0.188164	0.320238	-0.371397	-0.0829346	-0.420148	0.484828	-0.0839893	0.0968075	0.0119073	-0.151749	0.300237	-0.231478	-0.186684	-0.303978	0.0464812	-0.15743	0.0592712	-0.156943	-0.262899
ARRHYTHMOGENIC_RIGHT_VENTRICULAR_CARDIOMYOPATHY_ARVC	0.349413	-0.226228	-0.247993	-0.17804	0.370806	0.299144	0.132593	-0.25025	0.433913	0.29006	0.158586	0.460406	0.264554	-0.355128	-0.337162	-0.462611	-0.234864	0.35985	-0.19459	-0.30503	0.612553	-0.381729	0.331391	0.0572815	-0.362993	-0.262232	0.0871315	-0.0568131	0.522443	-0.0994546	-0.386104	0.297822	-0.402126	-0.0738738	-0.393223	0.436547	-0.051579	-0.00426909	0.208924	-0.0894395	0.237963	-0.175279	-0.0457854	-0.360789	0.101366	-0.0807744	0.0236789	-0.149211	-0.231791
DILATED_CARDIOMYOPATHY	0.384603	-0.322304	-0.22584	-0.256779	0.377336	0.379357	0.146335	-0.288188	0.402999	0.222254	0.204909	0.438368	0.114791	-0.297636	-0.394431	-0.416473	-0.364009	0.367125	-0.257664	-0.275844	0.539985	-0.437513	0.405172	-0.134686	-0.26621	-0.271619	0.0441081	-0.0532587	0.483052	-0.0195721	-0.272943	0.426186	-0.446731	-0.00408238	-0.480953	0.501994	-0.166382	-0.102911	-0.0206816	-0.128894	0.24943	-0.196595	-0.171935	-0.330419	-0.0202367	-0.0388795	0.186073	-0.172341	-0.206716
GLYCOLYSIS_GLUCONEOGENESIS	0.0603348	-0.0712067	-0.402914	0.399802	-0.0730916	-0.405707	-0.3865	0.106829	0.563243	-0.451717	-0.167195	-0.293408	-0.391906	-0.53955	-0.0850438	-0.381774	-0.071835	-0.232252	-0.293482	0.143982	0.196607	0.475842	0.166556	-0.385395	-0.443869	-0.158775	-0.0250048	-0.470781	-0.00028158	-0.448514	-0.154452	-0.264571	-0.14491	-0.0504729	0.289692	0.233971	0.334453	0.175435	-0.103681	0.0873513	0.429423	0.0609149	-0.0604825	0.0724979	0.0540755	0.414817	-0.154451	-0.0476682	-0.0242591
CITRATE_CYCLE_TCA_CYCLE	-0.0203855	0.134471	-0.0307438	0.581548	-0.0657229	-0.448932	-0.718544	0.311983	0.576121	-0.299644	-0.401173	-0.683477	-0.571007	-0.589116	0.225176	0.0221725	-0.0482777	-0.347496	-0.0806203	0.260978	-0.129223	0.647484	0.232777	-0.497177	-0.158366	0.280748	-0.0289222	-0.493793	0.168179	-0.652733	-0.454312	-0.473798	-0.262474	-0.292034	0.661776	-0.322819	0.696756	0.00356742	-0.224584	-0.294335	0.233472	0.502158	-0.0153069	0.349546	-0.165072	0.665115	-0.418759	-0.313208	0.227877
PENTOSE_PHOSPHATE_PATHWAY	0.00266242	-0.0143196	-0.239207	0.599847	-0.326069	-0.638094	-0.34365	0.224217	0.663931	-0.382196	-0.343235	-0.113837	-0.590296	-0.580815	-0.216417	-0.311329	-0.0694211	-0.120201	-0.0419548	-0.105105	0.372785	0.451251	0.273211	-0.160716	-0.383928	-0.116685	0.206625	-0.60655	-0.142717	-0.560687	-0.415448	-0.257323	-0.155344	0.133501	0.478945	0.229963	0.415479	0.215838	0.0735144	0.148975	0.238115	0.27466	0.106778	0.237497	-0.352985	0.379878	-0.34461	-0.219068	0.344893
PENTOSE_AND_GLUCURONATE_INTERCONVERSIONS	-0.0443065	-0.231703	0.326394	0.395629	-0.122641	-0.475485	-0.0993709	-0.0651526	0.66586	-0.251246	0.148348	-0.405714	-0.164941	-0.454903	0.0350984	-0.398622	0.309272	0.441041	-0.179123	0.492389	0.33807	0.70616	-0.0356157	-0.397197	-0.0599103	0.331223	0.370965	-0.455907	-0.0667485	-0.380925	0.256021	-0.440465	0.203258	0.139732	0.509796	0.142792	0.413398	0.219312	-0.373457	0.140246	0.10163	0.416914	0.362236	0.48663	0.353191	0.374312	0.352712	-0.41683	0.169965
FRUCTOSE_AND_MANNOSE_METABOLISM	0.176708	-0.166101	-0.436707	0.691069	-0.104411	-0.59661	-0.553427	0.112438	0.390212	-0.372803	-0.294999	-0.35669	-0.265386	-0.614614	-0.0903711	-0.462661	-0.0169773	-0.0960862	-0.136916	0.164015	0.204854	0.185745	0.440374	-0.294043	-0.317642	-0.0923575	0.0198681	-0.43014	-0.474903	-0.589603	-0.180428	-0.128595	-0.250026	0.103797	0.212148	0.0689145	0.55638	0.222913	-0.244855	0.0784115	0.332235	0.310375	0.066214	0.15687	0.188811	0.172332	-0.0934799	0.00207813	0.299243
GALACTOSE_METABOLISM	0.265604	0.083052	-0.480917	0.462422	0.0258124	-0.46392	-0.46649	0.330297	0.629495	-0.216759	-0.159818	-0.260752	-0.0396757	-0.580207	-0.2804	-0.36432	-0.0758862	-0.0253051	0.0119742	0.188121	0.479598	0.436363	0.42323	0.0309643	-0.398748	-0.184503	0.211193	-0.346245	-0.278823	-0.435159	-0.000463498	-0.189203	0.00206723	-0.161665	0.368124	0.049736	0.486835	0.427776	-0.187345	-0.0487676	0.54218	-0.0141183	-0.1086	0.326824	-0.00462104	0.355362	0.113405	-0.147886	0.152924
ASCORBATE_AND_ALDARATE_METABOLISM	-0.145521	-0.251741	0.406829	0.366381	-0.0646355	-0.305303	0.333805	-0.235378	0.673828	-0.188816	0.0353131	-0.43091	-0.0469873	-0.557273	-0.0626287	-0.415147	0.228109	0.441599	-0.364456	0.414431	0.326302	0.618978	-0.126853	-0.394911	-0.0797025	0.38103	0.0548501	-0.451827	0.0818708	-0.285756	0.224715	-0.356717	0.167576	0.255343	0.364243	0.09288	0.382231	-0.0417915	-0.271878	0.218058	0.0407308	0.523455	0.256056	0.457672	0.455749	0.296119	0.29198	-0.169871	-0.0626265
FATTY_ACID_METABOLISM	0.26323	0.0767486	-0.147791	0.246174	0.27222	-0.285798	-0.437694	-0.0833186	0.505956	-0.321828	-0.148435	-0.235349	-0.47566	-0.479805	-0.260142	-0.431386	-0.108521	-0.0766991	-0.172177	0.508819	-0.121119	0.458571	-0.0554483	-0.535065	-0.534689	0.0626206	-0.0302659	-0.55579	-0.0977527	-0.197666	-0.136808	-0.0159202	-0.00770847	0.0380458	0.239824	0.047244	0.484163	0.113062	-0.358178	-0.230328	0.0984683	0.334515	-0.0479477	0.27276	0.422518	0.408172	-0.0816495	-0.201105	-0.155591
STEROID_BIOSYNTHESIS	0.272444	-0.0519552	-0.261331	0.453812	-0.128519	-0.735992	-0.279527	-0.0236151	0.152632	-0.0571321	-0.249864	-0.089491	-0.574425	-0.681227	-0.614823	-0.0338665	0.444892	0.645173	0.576754	-0.521041	-0.133673	0.552182	0.631972	0.14905	0.452664	0.431787	0.323961	-0.125658	-0.563466	-0.662931	-0.183433	-0.282195	0.415322	0.577593	0.500213	-0.461048	0.542657	0.223777	0.374068	-0.21985	0.381368	0.673489	-0.574979	0.397441	-0.156643	0.47929	0.0281649	-0.283561	-0.248934
PRIMARY_BILE_ACID_BIOSYNTHESIS	0.35288	0.025553	0.0217686	-0.624025	0.413501	-0.188932	-0.106595	-0.129206	0.462748	0.138396	-0.0108888	-0.297107	-0.112215	-0.34614	-0.129289	-0.254436	-0.421257	0.0409587	-0.0176307	0.340004	0.259694	-0.0223028	0.234452	-0.682124	0.139719	0.377734	-0.198955	0.115231	0.179962	0.0346751	-0.156037	-0.0856548	-0.236789	-0.244647	0.145818	0.43791	0.226335	-0.247917	-0.0646552	-0.433732	0.103435	0.241118	-0.388229	-0.105361	0.111419	0.0573367	0.0262839	-0.379199	-0.285099
STEROID_HORMONE_BIOSYNTHESIS	-0.0581559	-0.241921	0.220376	-0.00378756	0.36736	-0.299119	0.240282	-0.226424	0.549498	0.0752027	0.248023	-0.353203	-0.0339304	-0.140731	0.0382781	-0.486131	0.160055	0.493373	-0.354769	0.446955	0.142426	0.385185	0.134297	-0.30607	0.0373826	0.192467	0.149174	-0.243408	0.00159787	-0.154922	0.20468	-0.257948	0.12362	0.141	0.252174	0.316379	0.368601	-0.107065	-0.239243	0.0722241	-0.133828	0.345332	-0.104426	0.21083	0.201619	-0.028639	0.15598	-0.276979	-0.00976319
OXIDATIVE_PHOSPHORYLATION	-0.366522	0.176629	-0.393007	0.312234	-0.180278	-0.417389	-0.29329	0.180534	-0.0885271	-0.718751	-0.168967	-0.606852	-0.31629	-0.356176	-0.0264434	-0.132796	-0.189976	-0.391949	0.354262	0.177925	-0.349093	0.594813	0.275413	-0.602667	-0.564705	0.331691	-0.431495	-0.450186	-0.419471	-0.617211	0.220842	-0.709308	0.161666	-0.413695	0.501104	-0.167695	0.435847	0.0796281	0.211496	0.333708	-0.122473	0.436825	0.313149	0.406221	-0.378065	0.120518	0.342707	0.50532	-0.24196
PURINE_METABOLISM	-0.0127028	-0.213239	-0.112245	0.177463	-0.18001	-0.377838	-0.420981	0.12818	0.318908	-0.311681	-0.0139565	-0.161744	-0.272199	-0.392937	0.00071812	-0.212425	-0.0938099	-0.0981543	0.212546	-0.109407	0.297632	0.0276306	0.211544	-0.238257	-0.0408275	-0.0451163	-0.0270745	-0.391389	0.113027	-0.408429	-0.295074	-0.053222	-0.246012	0.0380334	0.204516	0.0137804	0.33799	-0.0415156	0.159344	-0.0728194	0.41462	0.110634	-0.122602	-0.150006	-0.284076	0.25115	-0.208509	-0.0183667	0.0656287
PYRIMIDINE_METABOLISM	-0.0720622	-0.0530152	-0.0523107	0.431712	-0.427346	-0.621963	-0.50046	0.509235	0.235678	-0.390452	-0.24051	-0.189385	-0.464651	-0.532728	0.21742	-0.175066	-0.0510641	-0.200535	0.323137	-0.208389	0.237672	0.255307	0.0882262	0.0215937	-0.0437783	-0.214681	-0.00546788	-0.474237	-0.15254	-0.534305	-0.380252	-0.0617809	-0.113288	-0.0190117	0.348109	-0.305327	0.410685	0.0765506	0.310076	0.287552	0.422105	0.0702826	-0.0233186	0.00802417	-0.467488	0.512355	-0.357661	0.334681	0.129078
ALANINE_ASPARTATE_AND_GLUTAMATE_METABOLISM	0.278757	-0.129722	0.121262	0.353515	-0.361863	-0.598209	-0.565578	0.415206	0.483643	-0.0873377	0.225334	-0.274178	-0.401308	-0.419185	-0.307843	-0.280008	-0.101176	0.0822743	-0.0685462	-0.00792577	-0.103957	0.208846	0.166302	-0.237521	0.216331	0.376685	0.27654	-0.228329	0.125706	-0.569628	-0.120552	-0.118521	-0.273049	-0.13495	0.271938	-0.223735	0.516124	0.313105	-0.0476862	-0.0796571	0.341476	0.322568	-0.332761	-0.0591743	-0.307592	0.251938	-0.239554	-0.056005	0.384823
GLYCINE_SERINE_AND_THREONINE_METABOLISM	0.0297993	0.0797619	0.160768	-0.00199679	-0.0946205	-0.261264	-0.243848	-0.0700791	0.557237	0.0450786	-0.220558	-0.303589	-0.284105	-0.46662	-0.456378	-0.0337108	-0.388003	0.048403	0.216754	0.196139	0.0742817	0.00872698	0.224109	-0.446665	-0.0745768	0.398011	-0.00310976	-0.150112	-0.108093	-0.305658	-0.197407	-0.106347	-0.357865	-0.359145	0.336889	0.244981	0.0728025	-0.0361008	-0.0239686	-0.0975165	0.274875	0.0141457	-0.373259	-0.264914	-0.115035	0.186351	-0.223664	-0.29348	0.0467787
CYSTEINE_AND_METHIONINE_METABOLISM	-0.10615	-0.192218	-0.225128	0.212664	-0.332691	-0.485622	-0.511752	0.304161	0.516811	-0.303973	0.182332	-0.176607	-0.449461	-0.611437	0.11323	-0.146625	-0.300254	-0.325607	-0.1011	-0.00461477	0.4435	0.0738517	0.0581102	-0.299301	-0.179205	0.0287776	-0.0377455	-0.233101	0.0615975	-0.498213	-0.215524	0.0438402	-0.234631	-0.101666	0.400614	-0.385266	0.408654	0.0642592	0.449238	0.0796512	0.321596	-0.0061592	-0.265823	-0.150107	-0.451475	0.554799	-0.158609	-0.0885936	0.502552
VALINE_LEUCINE_AND_ISOLEUCINE_DEGRADATION	-0.0950294	-0.0742268	-0.240898	0.507762	0.0428647	-0.389999	-0.502555	-0.00495194	0.358375	-0.0965873	-0.166711	-0.349678	-0.576867	-0.595463	-0.0302623	0.0623924	-0.0975462	-0.161181	-0.0438372	0.32971	-0.280043	0.440321	0.0126399	-0.596001	-0.455207	0.198918	-0.275088	-0.367002	-0.00467052	-0.39299	-0.446889	-0.280336	-0.256622	-0.196276	0.316807	-0.329455	0.664688	0.0093425	-0.136343	0.151062	0.0266115	0.272992	-0.271099	0.390671	0.0372922	0.524922	0.239065	-0.35954	-0.0129335
VALINE_LEUCINE_AND_ISOLEUCINE_BIOSYNTHESIS	-0.154886	0.172352	-0.203811	0.631433	-0.37505	-0.657952	-0.760903	0.63178	-0.0127548	-0.0893341	0.0735386	-0.643021	-0.431372	-0.633512	0.146562	0.515317	0.255262	-0.36008	-0.035372	-0.467577	0.0241211	0.369048	0.491154	-0.393338	-0.434562	0.265934	-0.12998	-0.673763	0.267525	-0.717988	-0.597562	0.0125381	-0.37638	0.0993618	0.580966	-0.424453	0.587796	0.342206	0.413036	-0.288055	0.615482	0.273276	-0.230183	0.023493	-0.249086	0.672656	0.114145	-0.270232	0.319258
LYSINE_DEGRADATION	-0.064633	-0.101868	-0.00322334	0.509915	-0.0250472	-0.239048	-0.62671	0.173664	0.517523	0.174899	-0.288609	-0.147985	-0.495502	-0.380803	0.040358	-0.125503	-0.0807201	-0.0487232	0.365916	0.00101905	0.386334	0.0101057	0.252782	-0.0866726	-0.0105786	-0.287831	-0.0598309	-0.469654	0.110857	-0.149131	-0.447898	0.197609	-0.264552	-0.203813	0.293397	-0.113879	0.408887	-0.000982672	-0.227617	-0.0305665	0.36255	0.316586	-0.137662	0.426386	-0.152611	0.578742	-0.41431	-0.388052	0.306132
ARGININE_AND_PROLINE_METABOLISM	0.0442038	-0.161112	0.0372787	0.265271	-0.0100045	-0.441635	-0.392015	0.0624531	0.526161	-0.204714	-0.139624	-0.399593	-0.137037	-0.489424	-0.252433	-0.304918	-0.0561575	-0.252958	0.0287744	0.0157613	0.234629	0.374243	0.331781	-0.334504	-0.160726	0.231513	0.00492719	-0.491122	0.180566	-0.502313	-0.00204809	-0.395551	-0.320997	-0.183654	0.332691	0.153057	0.425963	0.15809	0.055821	0.0106742	0.289416	0.183478	-0.126452	-0.155351	-0.136014	0.209698	-0.087687	-0.106001	0.136159
HISTIDINE_METABOLISM	0.266309	-0.0646331	-0.0840345	0.0773135	0.203858	-0.278996	-0.228263	-0.0391645	0.419186	-0.0167149	-0.122175	-0.319064	-0.122924	0.00208317	-0.0647373	-0.415229	0.13079	-0.201145	-0.0959256	0.353771	-0.176581	0.344017	-0.191677	-0.251364	-0.127417	0.1207	-0.0747017	-0.276271	0.257892	0.0367333	-0.146489	-0.232889	-0.283375	0.0296797	0.384563	0.0950039	0.207273	-0.000408133	-0.00840735	-0.0765889	0.282203	0.256937	-0.0947134	0.0778169	0.140466	0.405896	-0.338854	-0.206445	-0.000610086
TYROSINE_METABOLISM	0.222411	-0.0851974	-0.144103	-0.0352883	0.067829	-0.147789	-0.142132	0.011385	0.358178	-0.280106	-0.0491431	-0.106763	-0.383127	-0.207318	-0.17035	-0.502753	-0.142815	-0.0179945	-0.0158204	0.261751	-0.0113385	0.0932019	0.087155	-0.294199	-0.0562535	0.159136	-0.192257	-0.185248	0.0129475	-0.06508	-0.0105631	-0.0759858	-0.134652	0.047986	0.118483	0.269473	-0.0992479	-0.254914	-0.104351	-0.258316	0.0866478	0.102364	-0.287388	-0.143334	-0.112711	0.372334	-0.254276	-0.231593	-0.0460654
PHENYLALANINE_METABOLISM	0.0408255	-0.0386994	-0.00820654	-0.177274	-0.0806483	-0.212277	0.129351	0.025804	0.478036	-0.330406	-0.293986	-0.188945	-0.351982	-0.451881	-0.242775	-0.575628	-0.343279	0.275508	-0.162711	0.313605	-0.0697577	0.146508	-0.00876169	-0.282551	-0.370242	0.241726	-0.179178	-0.134474	0.140533	-0.415622	0.0910034	-0.00757265	-0.303734	0.0617475	0.0426228	0.309477	-0.232445	-0.000317555	-0.0723787	-0.313492	0.0661368	0.122976	-0.343751	-0.265293	-0.1993	0.46223	-0.171342	-0.131598	0.133295
TRYPTOPHAN_METABOLISM	0.340148	-0.274071	-0.292185	0.10199	0.0793506	-0.245943	-0.422096	-0.135541	0.606651	-0.246399	-0.204803	-0.146944	-0.359932	-0.365048	-0.344597	-0.372235	-0.242703	-0.00302702	-0.31531	0.379465	0.12059	0.303131	0.237413	-0.501133	-0.429786	0.104908	-0.312375	-0.407234	-0.012128	-0.0816363	-0.177739	-0.0084444	-0.292084	-0.0142703	0.386441	0.273421	0.467818	-0.0150192	0.00473806	-0.370424	0.348865	0.167931	-0.196966	0.235471	-0.0294532	0.551234	-0.049058	-0.271231	0.011882
BETA_ALANINE_METABOLISM	-0.0064659	-0.199896	-0.244242	0.173414	0.159316	-0.313998	-0.31064	-0.0139732	0.29197	-0.283088	0.087771	0.132753	-0.507365	-0.531077	-0.17857	0.0694678	-0.305697	-0.279695	-0.0523274	0.281748	-0.302563	0.272888	0.0140154	-0.529919	-0.298328	0.290409	-0.284013	-0.280856	0.289279	-0.263911	-0.136423	-0.0981797	-0.298105	-0.0473095	0.162598	0.134983	0.495774	0.0184528	-0.0530257	0.24585	0.0399727	0.0507037	-0.0910017	0.351459	-0.0832613	0.331659	-0.130167	-0.00140554	0.220463
TAURINE_AND_HYPOTAURINE_METABOLISM	0.395168	-0.237312	0.480441	-0.0584686	0.382552	0.104737	0.0394543	-0.382439	0.00156319	0.208962	0.469388	0.228786	0.0259814	-0.427866	-0.375205	-0.418501	-0.291532	0.619515	-0.182278	0.248908	0.251718	-0.0948681	0.189117	-0.174698	0.561379	-0.100524	0.0824132	0.31609	0.0995203	0.121161	0.251389	0.230235	-0.0468889	-0.173555	-0.167262	0.175096	-0.3235	-0.150707	-0.271161	-0.155039	-0.0679397	0.258182	-0.359867	-0.0102795	-0.410055	-0.0683922	-0.0611582	-0.401289	0.0769815
SELENOAMINO_ACID_METABOLISM	0.136205	-0.0600474	0.0587019	0.474314	-0.228353	-0.605505	-0.647676	0.190044	0.451499	-0.259248	-0.106268	-0.151373	-0.293985	-0.456914	0.0641139	-0.190594	-0.0585718	-0.183449	0.100528	0.308289	0.422932	0.148705	-0.000306004	-0.362271	-0.0669572	0.0436026	-0.131543	-0.277756	-0.0250664	-0.416673	-0.389584	0.0928283	-0.102532	-0.0817969	0.523284	-0.168488	0.280882	-0.192172	0.137082	0.0855609	0.550896	0.0368114	-0.111998	0.0452345	-0.343881	0.385722	-0.389177	-0.228431	0.408942
GLUTATHIONE_METABOLISM	-0.0721472	-0.070155	-0.224664	0.277984	0.0176499	-0.531316	-0.180937	0.0859559	0.585747	-0.275587	-0.248938	-0.301955	-0.33989	-0.610073	0.114445	-0.402637	-0.113438	0.0308754	0.157082	0.226966	0.169139	0.44362	0.314315	-0.427037	-0.44591	-0.166868	-0.0784232	-0.313423	-0.203719	-0.469961	-0.00451937	-0.233604	-0.101471	-0.0162843	0.305919	0.202035	0.259695	-0.121258	0.0745144	-0.0392556	0.34815	0.181815	-0.0659106	0.18632	-0.310148	0.436894	-0.320316	-0.0408099	0.491183
STARCH_AND_SUCROSE_METABOLISM	0.145402	-0.105489	-0.143333	0.23207	0.258421	-0.0946241	-0.0611281	-0.102015	0.520752	-0.22589	0.216696	-0.119639	-0.0807646	-0.400386	-0.214338	-0.420058	0.104689	0.345595	-0.269716	0.418035	0.39472	0.36741	0.29448	-0.1598	-0.100961	0.12359	-0.018602	-0.393514	0.00520824	-0.340683	0.0586525	-0.197021	0.129299	0.10816	0.199078	0.10655	0.382166	0.147788	-0.139344	0.0918287	0.247239	0.224099	-0.0251168	0.237496	0.371661	0.254638	0.216306	-0.211016	0.148461
AMINO_SUGAR_AND_NUCLEOTIDE_SUGAR_METABOLISM	0.43232	0.0638881	-0.243444	0.431306	-0.0859793	-0.629181	-0.420874	0.0512477	0.544246	-0.464596	0.0538628	-0.133248	-0.00439463	-0.646854	-0.254199	-0.368321	0.176529	0.38602	0.0366282	0.201711	0.433165	0.246363	0.266693	-0.279799	-0.281963	0.0536904	0.100568	-0.42918	-0.333785	-0.540068	-0.127862	-0.199138	0.0229016	-0.0878781	0.439767	-0.124725	0.548256	0.289361	-0.188771	-0.0651856	0.380917	0.267681	-0.229685	0.468011	-0.188119	0.354866	-0.0171411	0.194243	0.205392
GLYCOSAMINOGLYCAN_BIOSYNTHESIS_CHONDROITIN_SULFATE	0.564635	-0.22926	-0.155856	-0.281998	-0.32037	-0.097853	-0.500085	-0.473447	0.563401	0.312024	-0.0210628	0.0703464	0.408504	-0.513902	-0.597194	-0.321677	-0.319921	0.463149	0.332671	-0.353898	0.66787	-0.540207	0.556118	0.0790069	-0.239225	-0.463371	0.479694	-0.11678	0.569426	0.420832	-0.25859	0.495582	-0.572534	-0.000852019	-0.57578	0.684299	-0.158427	-0.452352	-0.205089	-0.156702	0.659503	-0.401382	-0.640488	0.287889	-0.439935	0.00348505	0.175064	-0.433588	0.114217
GLYCOSAMINOGLYCAN_BIOSYNTHESIS_HEPARAN_SULFATE	0.275858	-0.187033	-0.317769	0.022384	-0.0979977	-0.238175	-0.275485	-0.093634	0.375779	0.276381	0.23344	0.0298872	0.280238	-0.56815	-0.499366	-0.363669	-0.180569	0.401852	0.1329	-0.260847	0.609612	-0.549791	0.500701	-0.140624	-0.161365	-0.3258	0.180497	-0.115211	0.373277	-0.0559123	-0.188029	0.183526	-0.382194	-0.0675263	-0.341181	0.444021	-0.182857	-0.129093	-0.298407	-0.0485623	0.554031	-0.340206	-0.168836	0.344822	-0.21593	0.194509	0.216129	-0.370653	-0.114687
INOSITOL_PHOSPHATE_METABOLISM	0.29601	-0.385287	-0.227707	0.263783	0.0915874	-0.0794966	-0.443697	0.158576	0.435375	0.329049	-0.0106707	0.268259	-0.391573	-0.296812	-0.0544803	-0.443617	-0.0266732	0.145844	-0.205611	0.209337	0.458879	-0.229052	0.105739	0.0459294	0.00139816	-0.207912	0.00572851	-0.393786	0.461157	-0.0497225	-0.412447	0.358211	-0.27766	-0.01434	-0.115995	0.00332489	0.0602297	-0.188198	-0.246646	-0.0208724	0.427739	0.204175	-0.0735918	0.371823	0.143685	0.246788	-0.325046	-0.350398	0.172203
PYRUVATE_METABOLISM	-0.0207028	0.067984	-0.371744	0.500097	0.0156079	-0.275899	-0.48824	-0.10883	0.395571	-0.312738	-0.203092	-0.521616	-0.516616	-0.544804	-0.0902091	-0.0393302	-0.0237893	-0.176933	-0.0438855	0.065711	0.152685	0.430707	0.0514382	-0.353273	-0.429414	0.038856	-0.075531	-0.39377	0.00520083	-0.497434	-0.243683	-0.387933	-0.08988	-0.276564	0.448136	-0.104139	0.486435	-0.0791677	0.107417	0.131193	0.371474	0.264886	-0.0505969	0.27876	-0.0409704	0.496195	-0.188498	-0.231407	0.0320306
GLYOXYLATE_AND_DICARBOXYLATE_METABOLISM	-0.182258	0.256392	0.0318643	0.601435	-0.405808	-0.605044	-0.794578	0.333131	0.544586	-0.428313	-0.282977	-0.607307	-0.591273	-0.661383	-0.125117	0.351034	-0.199214	-0.417442	0.27623	-0.20659	-0.0282	0.320257	0.315722	-0.279462	-0.371253	0.24784	-0.337563	-0.455052	0.0413237	-0.690534	-0.105669	-0.503826	-0.336768	-0.0477062	0.572464	-0.1211	0.613843	0.268919	0.409108	0.122267	0.331429	0.365787	0.170381	0.106908	-0.491201	0.704795	-0.181162	0.201059	-0.0387694
PROPANOATE_METABOLISM	-0.253339	0.110634	-0.253098	0.558091	0.109777	-0.261738	-0.465157	-0.253103	0.0823008	-0.128278	0.218857	-0.467104	-0.522268	-0.506791	-0.0713903	0.0938423	-0.16311	-0.29699	-0.230962	0.347579	-0.349026	0.490954	-0.0889011	-0.58548	-0.469196	0.264958	-0.273407	-0.37017	-0.0400332	-0.370057	-0.388317	-0.433368	-0.200786	0.036338	0.290737	-0.204351	0.570317	0.323991	-0.104438	-0.0745567	0.149708	0.398875	-0.256973	0.44227	0.248306	0.422812	0.134687	-0.382298	0.184648
BUTANOATE_METABOLISM	-0.132218	-0.0611343	-0.044466	0.488984	0.0884359	-0.419598	-0.368238	-0.0614165	0.426625	-0.0666337	0.0785806	-0.2411	-0.556804	-0.544561	-0.00371749	0.0882546	-0.269582	-0.330274	-0.227354	0.339718	-0.330743	0.501239	0.00561667	-0.599846	-0.383074	0.267768	-0.182468	-0.236442	-0.186088	-0.465616	-0.153804	-0.134588	-0.262927	0.00375405	0.311101	-0.180683	0.589178	0.274684	-0.101244	-0.039897	0.0151452	0.275069	0.0659992	0.395248	0.125	0.499011	-0.108532	-0.351267	0.196079
ONE_CARBON_POOL_BY_FOLATE	-0.0843045	-0.0340632	0.238186	0.628264	-0.61504	-0.568183	-0.703829	0.607849	0.179313	-0.472823	-0.0719849	-0.17318	-0.510809	-0.429952	-0.145397	0.108517	-0.234755	-0.499904	0.519758	-0.139317	-0.118621	0.123645	-0.310039	0.345341	0.498393	-0.282175	-0.348166	-0.568927	0.095414	-0.590951	-0.223426	0.218326	-0.191786	-0.506944	0.537827	-0.415839	0.530069	-0.319077	0.463477	0.0655319	0.548646	-0.243697	-0.25628	-0.208535	-0.518518	0.677721	-0.366019	0.304845	0.440568
FOLATE_BIOSYNTHESIS	0.109287	-0.240853	-0.387227	0.365921	-0.589433	-0.730482	-0.498717	0.131417	0.398225	-0.0793819	-0.454122	-0.536706	-0.27882	-0.587646	-0.338739	-0.362549	0.353109	-0.197849	0.440718	-0.18746	0.340448	0.285866	0.53152	-0.1012	-0.209808	-0.250499	0.00255014	-0.662244	0.0773459	-0.61396	0.43504	-0.598526	0.236414	-0.566941	0.444702	-0.0963209	0.533656	-0.32628	0.191423	0.492642	0.522217	0.347371	0.312893	0.108089	-0.181492	-0.0546792	0.258803	0.3095	0.081223
RETINOL_METABOLISM	0.171887	-0.272065	-0.0811354	0.214526	0.227866	-0.286798	0.108884	-0.0364713	0.495883	-0.152827	-0.0114395	-0.265531	-0.085571	-0.328888	0.231399	-0.402457	0.298459	0.349761	-0.411891	0.476744	0.0152773	0.439096	-0.149173	-0.426924	-0.0640854	0.252126	0.304341	-0.232659	-0.249974	-0.318802	0.223481	-0.403427	0.0698357	0.263706	0.152856	0.24082	0.154482	-0.195698	-0.348773	-0.1308	-0.0507342	0.281168	0.152879	0.380855	0.45601	0.259307	-0.00180013	-0.200944	-0.0660638
PORPHYRIN_AND_CHLOROPHYLL_METABOLISM	0.0969942	-0.329674	0.102752	0.145171	0.0763559	-0.46329	-0.210709	0.103711	0.632894	-0.162446	-0.084226	-0.195023	-0.158412	-0.475622	-0.0678231	-0.16932	0.123998	0.338973	-0.104088	0.329555	0.267504	0.503234	0.209577	-0.439132	-0.0587244	0.261942	-0.0232159	-0.507588	-0.0227884	-0.367831	-0.0554677	-0.271426	-0.0257195	0.169224	0.419179	-0.0732416	0.33012	0.22649	-0.18465	0.0237988	0.330139	0.281468	-0.116068	0.437191	-0.145361	0.453142	0.00554257	0.00280336	-0.090728
TERPENOID_BACKBONE_BIOSYNTHESIS	-0.454365	0.0724171	0.383165	0.575051	-0.652878	-0.683742	-0.382256	-0.000323891	0.406791	-0.449969	-0.365214	-0.249851	-0.627953	-0.760334	-0.289406	0.44351	0.566322	0.228416	0.0391738	-0.20266	-0.0737287	0.232155	0.371657	0.0215057	-0.157827	0.108379	0.10135	-0.206371	-0.47309	-0.721951	-0.522414	-0.539728	0.507314	0.064202	0.579938	-0.51315	0.598512	-0.314634	0.385063	0.049784	-0.121846	0.611327	-0.277367	0.234627	0.232634	0.602942	0.192453	-0.405904	-0.315983
LIMONENE_AND_PINENE_DEGRADATION	-0.383078	0.202372	-0.0257929	0.629051	-0.0990747	-0.475896	-0.210798	-0.190526	0.540266	-0.514456	-0.163613	-0.293763	-0.738026	-0.54729	-0.382912	-0.0498242	-0.34892	-0.421588	0.0117143	0.142732	-0.362393	0.499169	-0.447185	-0.602361	-0.7419	0.393714	-0.251901	-0.628412	-0.145457	-0.539489	0.15416	-0.147929	-0.319625	0.270669	0.221155	-0.0978879	0.542841	0.541654	0.200249	0.116532	0.366468	0.494433	0.376635	0.296418	0.430106	0.559765	0.157936	0.191879	-0.0885488
NITROGEN_METABOLISM	-0.013964	-0.0458456	-0.196848	0.306333	0.0147402	-0.417368	-0.222686	0.0255856	0.231819	-0.0778047	0.180569	-0.318458	-0.239185	-0.247652	-0.147599	-0.418591	0.373488	-0.113422	0.162187	0.275163	0.0204163	0.202446	0.120785	-0.0256281	-0.223432	0.208215	-0.329142	-0.335626	-0.0255497	-0.517055	0.358515	-0.239691	0.0540439	0.0216994	0.302131	0.0111579	0.104443	0.339362	-0.0175565	-0.0804958	0.426582	0.162949	-0.0370489	-0.0624121	0.406035	-0.201551	-0.133575	-0.412726	0.252867
SULFUR_METABOLISM	0.404802	-0.0749981	-0.257816	-0.145628	0.365951	-0.705943	-0.350363	-0.0878265	0.790794	-0.0789572	0.164396	-0.0852537	-0.349173	-0.426625	-0.00189551	-0.323992	-0.232433	-0.0366464	-0.0998868	0.427582	0.247998	0.23083	0.182567	-0.288508	-0.0871481	-0.194627	0.303112	-0.392213	-0.0384933	0.0452395	0.0526864	-0.165015	-0.395232	-0.394862	-0.476778	0.179875	0.485036	-0.122501	-0.227048	0.213174	0.286709	0.0981171	-0.152537	0.230674	0.0652169	-0.136869	-0.0678239	-0.324676	-0.0114297
METABOLISM_OF_XENOBIOTICS_BY_CYTOCHROME_P450	-0.144529	-0.322335	0.0359009	0.0897907	0.320799	-0.273223	0.133112	-0.14746	0.572852	-0.168265	0.0969217	-0.279413	-0.118466	-0.337234	0.265151	-0.518623	0.163601	0.257124	-0.402008	0.504053	-0.0660565	0.521868	-0.17951	-0.492335	-0.268123	0.293997	0.0981632	-0.333478	-0.164116	-0.358255	0.304938	-0.398877	-0.0721255	0.317753	0.289738	0.373487	0.092512	-0.111604	-0.346926	0.0415176	0.121353	0.395764	0.0399273	0.351684	0.425556	0.109421	-0.134763	-0.240079	0.122754
DRUG_METABOLISM_CYTOCHROME_P450	0.0210628	-0.340935	-0.104488	0.0159513	0.400865	-0.194237	0.144433	-0.197082	0.597936	-0.0527035	0.0515996	-0.173772	0.0103393	-0.307915	0.25061	-0.502315	0.0690333	0.248596	-0.403234	0.462934	-0.0408203	0.497143	-0.195252	-0.500476	-0.248065	0.265802	0.0524626	-0.158633	-0.127468	-0.280693	0.285797	-0.357244	-0.0805841	0.242192	0.0384228	0.3365	0.0855113	-0.103562	-0.357922	-0.115417	0.00331664	0.338613	-0.0109741	0.304833	0.436053	0.233131	-0.163279	-0.280857	-0.0149739
DRUG_METABOLISM_OTHER_ENZYMES	0.134435	-0.317135	0.134523	0.304419	0.242268	-0.483868	-0.210746	0.158183	0.477331	-0.0647599	-0.215508	-0.18593	-0.190394	-0.399076	0.318601	-0.321356	0.19435	0.32865	-0.133511	0.278156	0.300895	0.35982	-0.0274955	-0.237499	0.0185338	0.112068	0.106013	-0.252364	0.0124428	-0.384724	-0.164351	-0.263583	0.21927	0.0348265	0.295302	0.05491	0.313743	-0.10868	0.0368876	0.330118	-0.0492137	0.402495	0.193561	0.330153	0.0684865	0.303335	0.0167143	-0.0360688	0.00705767
BIOSYNTHESIS_OF_UNSATURATED_FATTY_ACIDS	0.0674037	0.401594	-0.287245	-0.0908421	0.230313	-0.25256	-0.2421	0.130502	0.544428	-0.0377143	0.0227118	-0.305028	-0.433196	-0.61091	-0.316685	-0.127581	-0.393902	0.197948	0.152597	0.363367	0.268579	0.316362	0.19355	-0.145382	-0.174784	0.257028	0.239491	-0.296228	-0.0979543	-0.546593	-0.339401	0.0160433	-0.235549	0.149106	0.303065	0.0911292	0.26424	0.18176	0.0750906	-0.230755	0.455623	-0.139169	-0.222101	0.273542	-0.297782	0.160209	0.0741955	-0.074684	0.351062
ABC_TRANSPORTERS	0.401826	-0.0692392	-0.240095	-0.325446	0.443283	-0.0858858	-0.338188	-0.197083	0.384621	0.362327	0.230074	0.263683	0.0545592	-0.178101	-0.189301	-0.42042	0.132195	0.108553	-0.0719201	0.393114	0.406498	-0.235845	0.275433	-0.153797	-0.116613	-0.128201	0.0749767	-0.277335	0.426997	0.312356	-0.391374	0.302186	-0.168295	0.189594	-0.0174662	0.264662	-0.0515243	-0.00663175	-0.387378	-0.457861	0.322194	-0.0230138	-0.254043	0.129894	0.376957	-0.00482707	-0.307932	-0.454601	0.292625
RIBOSOME	-0.741849	-0.584674	-0.461707	-0.307682	-0.571324	-0.709674	-0.130725	0.725448	-0.301658	-0.846432	-0.677497	-0.77875	-0.312209	0.307519	0.426895	-0.369111	-0.704366	-0.627942	0.10336	-0.0159723	-0.602048	0.446749	-0.535111	-0.623645	-0.735922	0.737399	-0.840635	-0.0539281	-0.353382	0.183245	0.266418	-0.788954	-0.825432	0.13299	0.165155	0.129227	0.110824	-0.127066	0.844564	0.502689	0.121594	0.301451	-0.0297409	-0.826683	-0.782532	0.628068	-0.533605	0.720058	0.0209578
[truncated: 99 more rows]
[truncated: 358 more columns]
