# Supplementary material for: Development and Verification of Ferroptosis-Related Gene Signature for Predicting the Prognosis and Immune Microenvironment in Gastric Cancer
Source: Research Square preprint supplement (doi:10.21203/rs.3.rs-1235765/v1), 2022-02-07
Supplement: Supplementary file 2 [file small_exp.xlsx]

## Sheet: 预后铁死亡基因
Tag	TCGA-CD-8529-01	TCGA-CG-4443-01	TCGA-BR-7197-01	TCGA-D7-A6EV-01	TCGA-ZA-A8F6-01	TCGA-RD-A8N2-01	TCGA-IN-8462-01	TCGA-D7-A4YX-01	TCGA-BR-7716-01	TCGA-BR-8373-01	TCGA-CG-4301-01	TCGA-FP-7916-01	TCGA-RD-A8N5-01	TCGA-CD-8534-01	TCGA-CG-4469-01	TCGA-BR-8295-01	TCGA-VQ-A91V-01	TCGA-BR-7901-01	TCGA-CG-5725-01	TCGA-HU-A4HB-01	TCGA-BR-6456-01	TCGA-R5-A7ZR-01	TCGA-D7-6818-01	TCGA-IN-8663-01	TCGA-CD-8533-01	TCGA-BR-4294-01	TCGA-VQ-A8PK-01	TCGA-RD-A8N6-01	TCGA-BR-7957-01	TCGA-D7-8574-01	TCGA-IN-A6RN-01	TCGA-FP-7998-01	TCGA-HU-A4GH-01	TCGA-VQ-AA6F-01	TCGA-CG-4436-01	TCGA-BR-6457-01	TCGA-CG-4465-01	TCGA-BR-4267-01	TCGA-HU-A4GQ-01	TCGA-HU-A4H3-01	TCGA-HF-7133-01	TCGA-B7-A5TJ-01	TCGA-HU-A4GP-01	TCGA-KB-A93J-01	TCGA-VQ-A927-01	TCGA-BR-6455-01	TCGA-F1-A448-01	TCGA-SW-A7EA-01	TCGA-VQ-AA6J-01
ZFP36	7.60023	3.98611	5.05896	7.70004	7.72128	6.09475	9.26658	6.35584	7.30169	6.37848	7.2721	6.98398	7.44913	5.92027	5.97614	7.34851	6.38587	10.8188	7.36401	6.55603	9.01864	6.98878	6.4571	5.13735	4.42494	7.23377	7.66676	7.54836	8.01142	6.23595	8.04442	6.173	6.35276	7.67902	6.22377	7.68484	6.82006	7.49712	7.09953	9.0652	6.86624	6.00822	8.45898	6.27777	6.13322	7.49806	8.03778	7.73144	5.08537
TUBE1	0.814243	1.07973	1.58461	1.86096	1.30934	1.60536	1.07897	1.98865	0.773786	1.51736	1.94154	1.38158	1.24276	1.77997	2.04678	1.29844	1.54078	1.20438	1.12903	1.44089	1.52425	1.10033	0.974897	1.36578	0.886615	0.532683	1.68991	2.31774	1.58351	1.70794	1.4017	1.26042	1.36784	1.04381	1.84647	1.01014	1.43115	0.854758	1.41347	1.67687	1.38111	1.77664	1.28072	1.14584	1.55559	0.852274	1.20805	1.06807	4.51372
SLC1A4	3.76805	4.6139	3.04054	3.47498	2.86737	1.8608	2.40345	2.551	3.40221	2.88638	2.61472	3.52997	2.67043	3.32036	2.03143	1.91527	3.24411	3.27123	3.65782	2.9403	4.47277	2.25361	4.39164	1.9255	4.40004	3.3558	2.69516	3.1743	2.79922	3.13171	1.91121	3.74145	2.91111	2.64564	3.54061	3.40239	2.65036	1.31134	2.57258	1.81365	4.32808	3.28576	2.83907	2.30069	3.00244	3.24916	2.56929	2.34706	4.57587
NOX5	0.0318257	0.0370268	0.016535	0.00867875	0.0407636	0.0241054	0.0501768	0.00144773	0.0181684	0.032785	0.0431901	0.016691	0.0308393	0.0318211	0.109196	0.4789	0.093507	0.111922	0.0916042	0.0252348	0.00773239	0.0206019	0.0233358	0.271385	0.0354829	0.0361524	0.0227705	0.0565949	0.0256693	0.0555516	0.0414824	0.0116084	0.0760914	0.0168443	0.0163191	0.0318046	0.00322533	0.0178529	0.00172964	0	0.0286445	0	0.0226965	0.00806333	0.0408213	0.00307305	0.0132009	0.002265	0.0181457
NOX4	1.07887	0.506063	0.345675	0.342902	0.131689	0.312732	0.434621	0.399863	0.467495	0.374951	1.1247	1.1352	1.51164	0.188849	0.331349	0.457646	0.172506	1.05459	0.166103	0.254765	1.35465	0.177842	0.687748	0.546519	0.595529	0.113485	0.415791	0.421318	1.03905	0.488345	0.172769	0.966838	0.16492	0.298542	0.168305	1.15615	1.01744	0.436136	0.764862	0.524616	0.266679	0.484984	0.204821	0.325456	0.444418	0.763849	0.865276	0.813764	0.612844
NFE2L2	4.7122	5.77011	4.86096	5.08376	4.88858	4.10055	5.21811	4.8807	4.66485	5.12232	5.43057	4.85867	4.43008	3.81712	4.8926	4.22623	4.75078	4.8382	3.44228	4.69968	4.12232	4.56041	4.0481	4.6719	4.89076	4.55029	5.33164	4.55558	4.89751	4.5569	4.6581	4.64413	4.4432	4.54647	4.8	4.32048	5.28705	5.40231	4.59613	4.61431	4.58515	4.53378	4.40783	5.20073	4.81462	4.99543	4.35345	4.59507	4.97746
MIR9-3	0	0	0	0	0	0	0	0	0	0	0	0	0	0.229259	0	0	0	0	0	0	0.377204	0	0	0	0	0	0	0.164663	0	0	0	0	0	0	0	0	0	0	0	0	0	0	0	0	0	0	0	0	0.150517
HAMP	1.11646	0.0851282	0.110836	0.207463	1.03717	0.34497	0.114206	0.207149	0.846113	0.13687	0.907026	0.550234	0.337774	0.154837	0.197947	0.551927	0.0478675	0.399152	0.053834	0.442081	0.766713	0.128284	1.20813	0.120341	0.192728	0.164195	0.153029	0.441369	0.175808	0.17237	0.463517	0.348721	0.0192596	0.0479487	0.0135789	0.390705	0.461278	0.196053	0.0355265	0.16012	0.229291	0.544227	0.0352228	0.302125	0.103739	1.12059	0.527573	0.334829	0.223658
GPX4	6.49921	6.1394	6.0952	6.80971	6.13534	5.73142	7.32682	6.37425	6.77117	5.30953	6.078	6.17275	6.38888	5.50313	6.03646	6.9987	5.35832	7.19454	7.19941	6.6575	6.91127	5.212	6.54116	5.68589	5.90458	7.13946	6.29431	6.55914	5.94862	6.07507	5.9912	6.26893	5.88028	5.88866	6.10534	7.11674	6.20007	6.09496	6.02144	6.9778	5.6886	6.59523	4.83659	5.9605	5.22631	6.14795	6.17797	6.97732	6.18371
GCH1	2.90349	1.74373	1.79295	2.49861	2.17904	0.912804	3.13001	3.31984	3.01172	2.56981	3.15986	3.11381	3.58127	2.74174	2.55668	2.38117	3.3675	2.59484	2.65089	3.00352	3.51826	2.35403	5.44618	2.8522	3.35181	1.79249	1.81403	1.75316	2.63492	2.51489	3.04444	3.26551	2.63834	1.865	3.02207	2.18389	3.35241	2.57025	3.20457	2.62485	4.14269	2.86198	2.35663	3.28526	2.2698	2.23049	3.52904	2.76595	2.62092
GABARAPL2	3.8988	4.87454	4.24626	4.09365	4.00384	3.62351	4.05346	3.91658	4.223	3.44425	4.61846	4.21505	3.88359	3.23882	4.23639	3.76736	4.22148	4.45412	4.24206	4.37679	3.73662	3.57762	3.63068	4.53809	3.99697	3.55065	3.64214	4.64369	3.81909	3.90799	3.54543	3.55293	4.28783	3.37987	3.91252	4.16659	4.41119	4.47098	4.18506	4.46071	3.24552	4.34593	3.37215	4.37416	3.92706	3.91053	4.12521	4.03967	4.02237
DUSP1	7.10664	4.31969	4.30002	5.90809	7.39253	6.41171	8.30562	4.55743	6.31729	6.21479	7.13118	5.67932	8.28757	4.92076	4.32205	6.37613	5.81777	7.58855	5.63541	5.7968	7.83996	4.43939	6.0114	3.90336	4.00493	5.15778	6.61038	5.75877	8.27024	5.08333	6.71711	5.48277	5.10243	6.63518	5.39562	7.98264	5.67666	7.20602	7.22708	6.90502	7.24623	5.03225	8.11026	4.52693	5.82473	5.89967	8.31045	6.07782	3.82293
CHAC1	1.57845	1.33409	3.25773	3.07621	1.94592	1.87019	3.13986	3.92916	3.6216	0.927841	3.05725	2.03757	2.70595	0.87068	1.73388	1.63833	4.46111	2.40887	2.27132	1.563	3.1664	1.99367	2.10026	1.92029	2.59074	0.481998	1.88771	1.42013	0.780712	0.748965	4.48342	1.44304	2.85321	2.19383	2.79359	1.70275	3.94122	2.56796	3.1582	2.37066	4.44232	1.72376	1.88009	1.6349	3.11955	1.01726	2.94243	5.35057	2.94107
CAPG	5.90396	3.25255	3.46832	5.81658	6.25314	3.41838	5.24815	5.29963	6.97167	5.02792	5.5308	5.81512	4.84222	4.34132	5.24878	4.12049	5.64737	5.02915	4.8889	5.67066	7.54728	5.42433	5.657	6.02291	3.76654	2.47455	5.14193	5.11739	4.4026	4.65203	4.54511	5.43328	6.04794	3.81599	3.92491	5.07543	5.22395	5.5925	5.2259	6.32514	5.38557	6.15091	5.21713	5.1064	5.89537	5.69623	4.60907	6.46719	6.38839
ACSL4	3.65455	3.15226	2.24772	3.81533	3.81375	4.59689	3.19033	3.46044	4.28695	4.44982	4.43182	3.8827	4.47014	3.3938	2.82793	1.98084	3.32491	4.78675	2.633	4.37033	3.49753	4.20679	4.07112	5.1992	4.18861	3.64471	4.0691	3.57022	4.66387	3.75874	3.67139	4.54748	4.86703	4.36646	3.69009	3.02974	3.86543	3.7609	4.00622	3.51817	3.87352	3.78899	3.68844	3.81465	3.96986	2.80024	5.3791	2.11262	4.51601
ACO1	3.5027	3.32934	2.23495	3.07136	3.52505	3.15351	1.89235	2.62893	3.2355	3.84383	3.06537	2.6879	3.31007	2.88741	2.86571	4.35379	2.88939	2.9191	2.20561	3.38088	2.79149	3.77304	3.57568	2.65068	2.56908	3.52072	3.37948	2.80324	3.36679	3.06065	3.60751	3.13744	2.74035	4.87296	3.99513	3.18161	3.60953	3.00309	5.27325	2.6071	3.68677	2.52518	4.06226	3.63694	3.77143	4.02183	3.16477	2.31942	3.00483
[truncated: 358 more columns]

## Sheet: 高低风险组
Tag	Time	Status	RiskScore	group	StromalScore	ImmuneScore	ESTIMATEScore			StromalScore	ImmuneScore	ESTIMATEScore
TCGA-BR-6709-01	370	1	2.81796	High	1147.98	2199.4	3347.38		TCGA-CD-8529-01	1147.98	2199.4	3347.38
TCGA-CG-5724-01	366	1	2.45524	High	-255.214	-211.698	-466.912		TCGA-CG-4443-01	-255.214	-211.698	-466.912
TCGA-BR-8295-01	67	1	1.95113	High	-320.695	-238.773	-559.468		TCGA-BR-7197-01	-320.695	-238.773	-559.468
TCGA-BR-6456-01	526	1	1.84888	High	-982.769	27.3085	-955.46		TCGA-D7-A6EV-01	-982.769	27.3085	-955.46
TCGA-D7-6525-01	406	1	1.83604	High	819.71	1398.11	2217.82		TCGA-ZA-A8F6-01	819.71	1398.11	2217.82
TCGA-CD-5813-01	377	1	1.70261	High	980.127	1076.12	2056.24		TCGA-RD-A8N2-01	980.127	1076.12	2056.24
TCGA-BR-A44U-01	422	1	1.66434	High	116.948	731.159	848.106		TCGA-IN-8462-01	116.948	731.159	848.106
TCGA-FP-A4BF-01	168	1	1.55305	High	-389.815	1410.58	1020.76		TCGA-D7-A4YX-01	-389.815	1410.58	1020.76
TCGA-D7-8570-01	752	0	1.54589	High	325.884	1819.82	2145.7		TCGA-BR-7716-01	325.884	1819.82	2145.7
TCGA-VQ-A91X-01	289	1	1.51408	High	490.027	444.846	934.873		TCGA-BR-8373-01	490.027	444.846	934.873
TCGA-CD-5801-01	401	1	1.50097	High	870.078	1314.99	2185.07		TCGA-CG-4301-01	870.078	1314.99	2185.07
TCGA-BR-7901-01	105	1	1.46877	High	964.891	2290.28	3255.17		TCGA-FP-7916-01	964.891	2290.28	3255.17
TCGA-BR-8059-01	439	1	1.46296	High	1387.44	1684.96	3072.4		TCGA-RD-A8N5-01	1387.44	1684.96	3072.4
TCGA-RD-A8N6-01	272	1	1.4294	High	10.2831	954.128	964.411		TCGA-CD-8534-01	10.2831	954.128	964.411
TCGA-BR-6564-01	794	1	1.41418	High	-195.261	1171.9	976.638		TCGA-CG-4469-01	-195.261	1171.9	976.638
TCGA-BR-6457-01	416	0	1.38942	High	-1187.21	-1032.44	-2219.65		TCGA-BR-8295-01	-1187.21	-1032.44	-2219.65
TCGA-BR-6705-01	779	1	1.37689	High	-1308.22	-38.1074	-1346.33		TCGA-VQ-A91V-01	-1308.22	-38.1074	-1346.33
TCGA-D7-8578-01	643	0	1.37209	High	937.249	1280.23	2217.48		TCGA-BR-7901-01	937.249	1280.23	2217.48
TCGA-CG-5725-01	457	1	1.34614	High	-904.386	-390.672	-1295.06		TCGA-CG-5725-01	-904.386	-390.672	-1295.06
TCGA-BR-7722-01	466	1	1.33453	High	-198.411	2419.02	2220.61		TCGA-HU-A4HB-01	-198.411	2419.02	2220.61
TCGA-VQ-AA6K-01	378	1	1.29583	High	1119.39	1216.9	2336.29		TCGA-BR-6456-01	1119.39	1216.9	2336.29
TCGA-RD-A8N4-01	2171	0	1.28612	High	-1041.24	354.989	-686.248		TCGA-R5-A7ZR-01	-1041.24	354.989	-686.248
TCGA-VQ-A922-01	275	1	1.27736	High	1169.28	1543.89	2713.17		TCGA-D7-6818-01	1169.28	1543.89	2713.17
TCGA-D7-6520-01	573	0	1.25979	High	-818.417	-90.3827	-908.8		TCGA-IN-8663-01	-818.417	-90.3827	-908.8
TCGA-HU-A4HD-01	1016	0	1.25591	High	-472.157	-653.019	-1125.18		TCGA-CD-8533-01	-472.157	-653.019	-1125.18
TCGA-BR-6453-01	485	0	1.23858	High	-704.616	-80.8755	-785.492		TCGA-BR-4294-01	-704.616	-80.8755	-785.492
TCGA-D7-8572-01	511	0	1.21911	High	-364.878	460.612	95.7342		TCGA-VQ-A8PK-01	-364.878	460.612	95.7342
TCGA-CD-A48C-01	353	1	1.20067	High	-129.51	84.0175	-45.4927		TCGA-RD-A8N6-01	-129.51	84.0175	-45.4927
TCGA-HU-A4H3-01	882	0	1.19692	High	1311.99	747.275	2059.26		TCGA-BR-7957-01	1311.99	747.275	2059.26
TCGA-VQ-A8E0-01	562	1	1.08938	High	1549.3	2716.96	4266.26		TCGA-D7-8574-01	1549.3	2716.96	4266.26
TCGA-BR-6566-01	997	0	1.03895	High	-1009.47	218.685	-790.784		TCGA-IN-A6RN-01	-1009.47	218.685	-790.784
TCGA-CD-5799-01	396	0	1.03715	High	1280.58	2850.59	4131.17		TCGA-FP-7998-01	1280.58	2850.59	4131.17
TCGA-BR-A44T-01	1038	0	1.01927	High	-1659.62	439.361	-1220.26		TCGA-HU-A4GH-01	-1659.62	439.361	-1220.26
TCGA-BR-7717-01	552	1	1.01009	High	-551.279	1088.14	536.862		TCGA-VQ-AA6F-01	-551.279	1088.14	536.862
TCGA-B7-A5TI-01	595	0	0.994306	High	-615.073	1183.94	568.864		TCGA-CG-4436-01	-615.073	1183.94	568.864
TCGA-BR-8058-01	1133	0	0.98561	High	1469.48	1588.77	3058.24		TCGA-BR-6457-01	1469.48	1588.77	3058.24
TCGA-BR-6803-01	949	0	0.979625	High	693.218	1458.09	2151.31		TCGA-CG-4465-01	693.218	1458.09	2151.31
TCGA-CD-A487-01	374	0	0.963718	High	-118.898	946.562	827.664		TCGA-BR-4267-01	-118.898	946.562	827.664
TCGA-BR-6563-01	1190	0	0.953642	High	218.87	850.76	1069.63		TCGA-HU-A4GQ-01	218.87	850.76	1069.63
TCGA-BR-8365-01	533	1	0.942298	High	-611.71	580.453	-31.2569		TCGA-HU-A4H3-01	-611.71	580.453	-31.2569
TCGA-BR-A4J5-01	862	0	0.93603	High	295.48	1628.8	1924.28		TCGA-HF-7133-01	295.48	1628.8	1924.28
TCGA-BR-8372-01	951	0	0.89874	High	-453.995	155.395	-298.6		TCGA-B7-A5TJ-01	-453.995	155.395	-298.6
TCGA-SW-A7EA-01	579	0	0.891034	High	-551.763	366.911	-184.852		TCGA-HU-A4GP-01	-551.763	366.911	-184.852
TCGA-BR-6458-01	588	1	0.886739	High	-197.335	1633.25	1435.91		TCGA-KB-A93J-01	-197.335	1633.25	1435.91
TCGA-RD-A8MW-01	1153	1	0.862645	High	-217.862	738.461	520.599		TCGA-VQ-A927-01	-217.862	738.461	520.599
TCGA-BR-4191-01	558	1	0.859998	High	261.69	1393.71	1655.4		TCGA-BR-6455-01	261.69	1393.71	1655.4
TCGA-BR-6455-01	422	1	0.829656	High	727.343	1808.98	2536.32		TCGA-F1-A448-01	727.343	1808.98	2536.32
TCGA-VQ-A8E2-01	1319	0	0.827689	High	-151.536	902.443	750.907		TCGA-SW-A7EA-01	-151.536	902.443	750.907
TCGA-BR-6707-01	605	1	0.825988	High	56.7443	1763.82	1820.57		TCGA-VQ-AA6J-01	56.7443	1763.82	1820.57
TCGA-BR-4201-01	940	1	0.810335	High	1281.12	1829.59	3110.72		TCGA-BR-7196-01	1281.12	1829.59	3110.72
TCGA-CD-8532-01	354	1	0.808025	High	196.763	657.272	854.035		TCGA-BR-7717-01	196.763	657.272	854.035
TCGA-D7-8575-01	554	1	0.807268	High	1233.51	1259.56	2493.07		TCGA-BR-A4J5-01	1233.51	1259.56	2493.07
TCGA-BR-8588-01	389	0	0.80351	High	1639.87	2513.81	4153.67		TCGA-FP-8209-01	1639.87	2513.81	4153.67
TCGA-BR-8686-01	635	1	0.794815	High	1234.83	2510.62	3745.45		TCGA-FP-A4BF-01	1234.83	2510.62	3745.45
TCGA-CD-A4MG-01	200	1	0.786883	High	615.589	695.097	1310.69		TCGA-BR-8297-01	615.589	695.097	1310.69
TCGA-IN-8462-01	572	0	0.785711	High	490.878	1183.87	1674.75		TCGA-CD-A4MG-01	490.878	1183.87	1674.75
TCGA-CD-8529-01	374	0	0.783364	High	17.2075	1844.09	1861.29		TCGA-BR-8372-01	17.2075	1844.09	1861.29
TCGA-VQ-AA64-01	560	1	0.759233	High	1035.88	2317.71	3353.59		TCGA-BR-4191-01	1035.88	2317.71	3353.59
TCGA-VQ-A8PQ-01	476	1	0.748885	High	-464.57	902.605	438.035		TCGA-HU-A4H2-01	-464.57	902.605	438.035
TCGA-BR-4267-01	188	1	0.732442	High	921.708	2546.77	3468.48		TCGA-RD-A8N0-01	921.708	2546.77	3468.48
TCGA-RD-A8N1-01	3519	0	0.730416	High	-495.691	2156.09	1660.4		TCGA-BR-8589-01	-495.691	2156.09	1660.4
TCGA-VQ-A8E3-01	661	1	0.729726	High	1307.51	2361.75	3669.26		TCGA-BR-8058-01	1307.51	2361.75	3669.26
TCGA-D7-5578-01	385	0	0.715608	High	306.873	-130.171	176.702		TCGA-VQ-A922-01	306.873	-130.171	176.702
TCGA-IN-8663-01	103	1	0.710822	High	-968.651	662.23	-306.422		TCGA-VQ-AA69-01	-968.651	662.23	-306.422
TCGA-HU-A4G2-01	739	0	0.70185	High	427.913	1980.91	2408.82		TCGA-CD-8532-01	427.913	1980.91	2408.82
TCGA-BR-8677-01	813	0	0.69756	High	1295.35	1834.73	3130.08		TCGA-BR-4370-01	1295.35	1834.73	3130.08
TCGA-RD-A8N5-01	1747	1	0.695515	High	-273.052	19.2338	-253.818		TCGA-BR-8678-01	-273.052	19.2338	-253.818
TCGA-BR-7723-01	874	1	0.689282	High	-33.5455	427.471	393.925		TCGA-BR-A4J6-01	-33.5455	427.471	393.925
TCGA-FP-8209-01	1811	1	0.687305	High	488.068	1692.79	2180.86		TCGA-CG-5720-01	488.068	1692.79	2180.86
TCGA-D7-6519-01	625	0	0.687025	High	101.538	1668.3	1769.83		TCGA-CG-4438-01	101.538	1668.3	1769.83
TCGA-BR-8364-01	675	0	0.679433	High	246.247	743.501	989.748		TCGA-D7-6525-01	246.247	743.501	989.748
TCGA-BR-7196-01	666	0	0.674253	High	754.128	1176.65	1930.78		TCGA-RD-A8N4-01	754.128	1176.65	1930.78
TCGA-VQ-A8E7-01	1138	0	0.662632	High	49.6153	2241.58	2291.19		TCGA-VQ-A923-01	49.6153	2241.58	2291.19
TCGA-CG-5723-01	2496	0	0.654271	High	-201.136	1428.23	1227.1		TCGA-D7-8575-01	-201.136	1428.23	1227.1
TCGA-FP-7916-01	428	1	0.638031	High	201.605	761.377	962.982		TCGA-CD-A48C-01	201.605	761.377	962.982
TCGA-CG-4469-01	215	1	0.630574	High	841.148	1937.16	2778.31		TCGA-CG-4305-01	841.148	1937.16	2778.31
TCGA-VQ-A91Q-01	633	1	0.628638	High	462.718	1470.92	1933.63		TCGA-D7-5578-01	462.718	1470.92	1933.63
TCGA-HJ-7597-01	805	1	0.622759	High	1715.36	2383.8	4099.16		TCGA-CD-5813-01	1715.36	2383.8	4099.16
TCGA-KB-A6F7-01	1935	0	0.606493	High	1142.32	1674.84	2817.16		TCGA-BR-8677-01	1142.32	1674.84	2817.16
TCGA-D7-5577-01	782	1	0.588556	High	-866.682	537.219	-329.463		TCGA-MX-A666-01	-866.682	537.219	-329.463
TCGA-HU-A4GF-01	785	0	0.580157	High	320.591	2067.97	2388.56		TCGA-D7-A6EY-01	320.591	2067.97	2388.56
TCGA-BR-8382-01	762	1	0.567661	High	1247.82	1608.02	2855.84		TCGA-D7-6524-01	1247.82	1608.02	2855.84
TCGA-CD-8534-01	367	0	0.564771	High	990.412	1976.66	2967.07		TCGA-RD-A8MW-01	990.412	1976.66	2967.07
TCGA-CG-4438-01	1645	0	0.54099	High	-1137.52	-272.398	-1409.92		TCGA-VQ-A8P2-01	-1137.52	-272.398	-1409.92
TCGA-D7-A6EY-01	348	1	0.535931	High	-964.254	1521.59	557.338		TCGA-FP-A9TM-01	-964.254	1521.59	557.338
TCGA-MX-A5UJ-01	600	0	0.525246	High	161.545	2104.36	2265.91		TCGA-BR-7704-01	161.545	2104.36	2265.91
TCGA-FP-8099-01	519	0	0.520169	High	-255.697	437.753	182.056		TCGA-CG-4442-01	-255.697	437.753	182.056
TCGA-IN-7806-01	1106	0	0.515309	High	791.414	2892.12	3683.54		TCGA-VQ-A8PQ-01	791.414	2892.12	3683.54
TCGA-CG-4301-01	92	0	0.500663	High	788.099	992.073	1780.17		TCGA-BR-A4J9-01	788.099	992.073	1780.17
TCGA-CG-4460-01	669	1	0.495292	High	-768.315	-304.377	-1072.69		TCGA-VQ-A94T-01	-768.315	-304.377	-1072.69
TCGA-CD-8531-01	383	0	0.494193	High	-819.091	740.43	-78.6612		TCGA-BR-4371-01	-819.091	740.43	-78.6612
TCGA-CG-5726-01	881	1	0.493496	High	1411.54	1478.72	2890.27		TCGA-BR-8384-01	1411.54	1478.72	2890.27
TCGA-D7-6524-01	543	0	0.493468	High	-1239.33	989.925	-249.409		TCGA-VQ-A91E-01	-1239.33	989.925	-249.409
TCGA-BR-7957-01	276	1	0.491134	High	-141.346	330.804	189.458		TCGA-CD-5799-01	-141.346	330.804	189.458
TCGA-VQ-A8DT-01	1484	0	0.482015	High	200.374	455.288	655.663		TCGA-CD-A487-01	200.374	455.288	655.663
TCGA-BR-6801-01	1223	0	0.47379	High	-1078.36	-38.9496	-1117.31		TCGA-VQ-A8PU-01	-1078.36	-38.9496	-1117.31
TCGA-VQ-A8PO-01	282	1	0.436738	High	-1014.56	599.118	-415.445		TCGA-HF-A5NB-01	-1014.56	599.118	-415.445
TCGA-VQ-A94R-01	1294	1	0.43357	High	-122.975	590.325	467.35		TCGA-HU-A4GC-01	-122.975	590.325	467.35
TCGA-BR-8297-01	225	0	0.42739	High	-112.636	790.083	677.447		TCGA-VQ-AA6K-01	-112.636	790.083	677.447
TCGA-HU-A4G8-01	690	0	0.423761	High	531.907	1465.69	1997.59		TCGA-BR-8382-01	531.907	1465.69	1997.59
TCGA-HF-7134-01	1588	0	0.420042	High	135.162	755.804	890.966		TCGA-VQ-A8P5-01	135.162	755.804	890.966
TCGA-F1-A448-01	647	0	0.418952	Low	1088.21	2541.8	3630.02		TCGA-BR-6709-01	1088.21	2541.8	3630.02
TCGA-BR-8286-01	895	0	0.418049	Low	158.608	270.75	429.358		TCGA-EQ-8122-01	158.608	270.75	429.358
TCGA-D7-6526-01	523	0	0.407623	Low	94.7591	1085.54	1180.3		TCGA-CG-5724-01	94.7591	1085.54	1180.3
TCGA-BR-7704-01	1072	0	0.405087	Low	114.822	2329.4	2444.22		TCGA-RD-A8MV-01	114.822	2329.4	2444.22
TCGA-VQ-A92D-01	2032	0	0.403926	Low	2.84563	1569.53	1572.37		TCGA-VQ-A8PO-01	2.84563	1569.53	1572.37
TCGA-HU-8249-01	881	0	0.39057	Low	-1829.1	-534.513	-2363.62		TCGA-VQ-A91X-01	-1829.1	-534.513	-2363.62
TCGA-HU-A4H2-01	394	0	0.387423	Low	1254.25	1389.6	2643.85		TCGA-BR-6564-01	1254.25	1389.6	2643.85
TCGA-BR-7959-01	1010	0	0.384483	Low	142.467	836.994	979.461		TCGA-CD-A486-01	142.467	836.994	979.461
TCGA-B7-A5TJ-01	335	0	0.373926	Low	-6.70128	647.296	640.595		TCGA-D7-8576-01	-6.70128	647.296	640.595
TCGA-D7-8574-01	523	0	0.358778	Low	331.057	199.948	531.006		TCGA-VQ-AA64-01	331.057	199.948	531.006
TCGA-BR-7707-01	1090	0	0.356113	Low	-883.644	159.529	-724.114		TCGA-VQ-A925-01	-883.644	159.529	-724.114
TCGA-VQ-AA6A-01	1184	0	0.353424	Low	1195.88	1073.22	2269.1		TCGA-VQ-A91A-01	1195.88	1073.22	2269.1
TCGA-ZA-A8F6-01	525	0	0.350463	Low	143.217	1078.63	1221.85		TCGA-BR-A4J4-01	143.217	1078.63	1221.85
TCGA-BR-6852-01	1367	0	0.350415	Low	-1162.3	238.618	-923.677		TCGA-VQ-A8DT-01	-1162.3	238.618	-923.677
TCGA-CG-4441-01	426	1	0.348223	Low	838.069	2655.47	3493.54		TCGA-D7-8570-01	838.069	2655.47	3493.54
TCGA-VQ-A8PU-01	832	1	0.346271	Low	-516.129	1044.95	528.818		TCGA-VQ-A91S-01	-516.129	1044.95	528.818
TCGA-VQ-AA68-01	1328	0	0.341523	Low	-355.394	542.953	187.559		TCGA-CG-4460-01	-355.394	542.953	187.559
TCGA-D7-A74A-01	607	0	0.332133	Low	970.003	2666.29	3636.29		TCGA-BR-6453-01	970.003	2666.29	3636.29
TCGA-BR-7197-01	280	0	0.327787	Low	-870.702	679.516	-191.186		TCGA-BR-8368-01	-870.702	679.516	-191.186
TCGA-BR-8589-01	825	0	0.326658	Low	1164.34	1613.45	2777.79		TCGA-BR-8590-01	1164.34	1613.45	2777.79
TCGA-CG-5718-01	1095	1	0.325299	Low	-73.7645	1002.78	929.02		TCGA-HU-A4G2-01	-73.7645	1002.78	929.02
TCGA-BR-7716-01	1210	0	0.313428	Low	-161.935	1545.57	1383.64		TCGA-BR-A4PF-01	-161.935	1545.57	1383.64
TCGA-CG-4465-01	274	1	0.309278	Low	496.92	1706.05	2202.97		TCGA-RD-A8NB-01	496.92	1706.05	2202.97
TCGA-HU-A4H6-01	644	0	0.303778	Low	-1384.14	159.797	-1224.34		TCGA-IN-AB1V-01	-1384.14	159.797	-1224.34
TCGA-HU-A4HB-01	477	1	0.301233	Low	-552.772	1040.6	487.828		TCGA-SW-A7EB-01	-552.772	1040.6	487.828
TCGA-BR-6802-01	940	0	0.297534	Low	318.683	283.982	602.665		TCGA-VQ-A8E2-01	318.683	283.982	602.665
TCGA-KB-A93J-01	1124	0	0.285767	Low	152.396	1624.46	1776.85		TCGA-BR-8077-01	152.396	1624.46	1776.85
TCGA-VQ-AA6G-01	792	1	0.275209	Low	-75.8334	1171.39	1095.56		TCGA-HU-8238-01	-75.8334	1171.39	1095.56
TCGA-VQ-A94T-01	342	1	0.27326	Low	878.643	1753.52	2632.17		TCGA-BR-6458-01	878.643	1753.52	2632.17
TCGA-HF-A5NB-01	928	0	0.269772	Low	922.414	1852.5	2774.91		TCGA-BR-8588-01	922.414	1852.5	2774.91
TCGA-RD-A8N0-01	1236	0	0.247956	Low	399.558	2551.21	2950.77		TCGA-HU-8608-01	399.558	2551.21	2950.77
TCGA-VQ-A8PB-01	1043	1	0.247074	Low	-2.47253	630.041	627.568		TCGA-FP-8099-01	-2.47253	630.041	627.568
TCGA-MX-A666-01	427	0	0.242039	Low	353.755	1282.6	1636.36		TCGA-BR-8486-01	353.755	1282.6	1636.36
TCGA-HU-A4GP-01	273	0	0.235017	Low	1025.6	2413.99	3439.59		TCGA-B7-A5TK-01	1025.6	2413.99	3439.59
TCGA-CG-4305-01	485	0	0.223651	Low	740.401	2357.88	3098.28		TCGA-BR-6852-01	740.401	2357.88	3098.28
TCGA-D7-8573-01	593	0	0.216386	Low	920.096	1242.84	2162.93		TCGA-D7-8572-01	920.096	1242.84	2162.93
TCGA-VQ-A94U-01	819	0	0.215188	Low	-269.081	160.715	-108.366		TCGA-HU-A4HD-01	-269.081	160.715	-108.366
TCGA-CG-4443-01	912	0	0.214834	Low	1584.39	1206.83	2791.21		TCGA-BR-6705-01	1584.39	1206.83	2791.21
TCGA-CG-5732-01	2100	1	0.201091	Low	361.491	2182.81	2544.3		TCGA-CD-8531-01	361.491	2182.81	2544.3
TCGA-BR-8367-01	801	1	0.19722	Low	-693.018	731.154	38.1361		TCGA-HU-A4GF-01	-693.018	731.154	38.1361
TCGA-KB-A93G-01	613	0	0.192194	Low	1057.82	1594.55	2652.37		TCGA-BR-4361-01	1057.82	1594.55	2652.37
TCGA-BR-8081-01	981	0	0.168349	Low	-415.924	433.499	17.5742		TCGA-D7-6519-01	-415.924	433.499	17.5742
TCGA-HU-A4GH-01	358	0	0.154148	Low	-918.793	56.9322	-861.861		TCGA-D7-6528-01	-918.793	56.9322	-861.861
TCGA-VQ-A94O-01	640	1	0.136132	Low	310.806	403.864	714.67		TCGA-BR-8289-01	310.806	403.864	714.67
TCGA-CG-4477-01	942	0	0.122188	Low	361.439	714.535	1075.97		TCGA-MX-A5UJ-01	361.439	714.535	1075.97
TCGA-RD-A8N2-01	3540	0	0.106116	Low	152.426	1871.97	2024.39		TCGA-BR-6707-01	152.426	1871.97	2024.39
TCGA-IN-AB1V-01	479	0	0.10366	Low	-284.09	218.756	-65.3342		TCGA-IN-A7NT-01	-284.09	218.756	-65.3342
TCGA-VQ-A91V-01	1297	0	0.0943655	Low	230.721	856.193	1086.91		TCGA-BR-A4CS-01	230.721	856.193	1086.91
TCGA-HU-A4GX-01	616	0	0.0864612	Low	562.021	611.28	1173.3		TCGA-B7-A5TN-01	562.021	611.28	1173.3
TCGA-VQ-A91A-01	1200	0	0.0706095	Low	543.606	1383	1926.61		TCGA-CG-4444-01	543.606	1383	1926.61
TCGA-RD-A8NB-01	513	1	0.0630209	Low	-699.663	1544.5	844.834		TCGA-IN-AB1X-01	-699.663	1544.5	844.834
TCGA-BR-6452-01	1055	0	0.0489399	Low	-465.766	836.909	371.142		TCGA-VQ-A8PE-01	-465.766	836.909	371.142
TCGA-VQ-A924-01	1686	1	0.0434137	Low	-826.705	200.152	-626.552		TCGA-VQ-AA6G-01	-826.705	200.152	-626.552
TCGA-D7-A6EV-01	342	0	0.0346578	Low	-1169.71	617.463	-552.246		TCGA-D7-A74A-01	-1169.71	617.463	-552.246
TCGA-VQ-A91S-01	1000	0	0.0287056	Low	-534.135	-207.617	-741.752		TCGA-D7-A6EX-01	-534.135	-207.617	-741.752
TCGA-VQ-A8P3-01	1132	0	0.0101903	Low	660.813	1700.51	2361.32		TCGA-BR-4368-01	660.813	1700.51	2361.32
TCGA-R5-A7ZR-01	185	1	0.00828471	Low	113.2	1143.6	1256.8		TCGA-BR-8591-01	113.2	1143.6	1256.8
TCGA-CG-4444-01	1431	0	-0.00215737	Low	235.672	1533.01	1768.69		TCGA-F1-6874-01	235.672	1533.01	1768.69
TCGA-HU-8604-01	694	0	-0.00948963	Low	-499.343	1594.76	1095.42		TCGA-HU-A4GX-01	-499.343	1594.76	1095.42
TCGA-VQ-A8PE-01	675	1	-0.014095	Low	-593.732	178.63	-415.102		TCGA-D7-6526-01	-593.732	178.63	-415.102
TCGA-VQ-A91K-01	1862	0	-0.0155754	Low	1156.58	1595.42	2752		TCGA-BR-6803-01	1156.58	1595.42	2752
TCGA-D7-8576-01	446	1	-0.0193573	Low	12.7707	1694.59	1707.36		TCGA-HU-8602-01	12.7707	1694.59	1707.36
TCGA-D7-6818-01	321	0	-0.0455258	Low	79.0421	629.084	708.126		TCGA-BR-4366-01	79.0421	629.084	708.126
TCGA-VQ-AA6F-01	1646	0	-0.0618567	Low	628.425	1922.4	2550.83		TCGA-BR-8690-01	628.425	1922.4	2550.83
TCGA-BR-7715-01	1023	0	-0.0630543	Low	154.768	2171.62	2326.39		TCGA-CD-5801-01	154.768	2171.62	2326.39
TCGA-IN-A6RN-01	594	0	-0.0640177	Low	72.4296	907.814	980.243		TCGA-BR-7723-01	72.4296	907.814	980.243
TCGA-HU-A4H4-01	725	0	-0.0718463	Low	-13.6354	1226.61	1212.97		TCGA-FP-7735-01	-13.6354	1226.61	1212.97
TCGA-BR-8361-01	946	0	-0.0732813	Low	11.9491	1159.46	1171.41		TCGA-VQ-A91K-01	11.9491	1159.46	1171.41
TCGA-VQ-A927-01	200	1	-0.0753366	Low	691.131	292.305	983.437		TCGA-BR-8059-01	691.131	292.305	983.437
TCGA-VQ-A8PK-01	543	1	-0.0832466	Low	971.838	2301.47	3273.31		TCGA-BR-8381-01	971.838	2301.47	3273.31
TCGA-BR-8680-01	972	0	-0.0854628	Low	-1071.35	-72.0945	-1143.45		TCGA-VQ-A8PJ-01	-1071.35	-72.0945	-1143.45
TCGA-BR-8591-01	856	0	-0.0893255	Low	100.987	900.258	1001.25		TCGA-BR-7722-01	100.987	900.258	1001.25
TCGA-3M-AB46-01	1765	0	-0.0920484	Low	702.873	2073.81	2776.68		TCGA-R5-A805-01	702.873	2073.81	2776.68
TCGA-R5-A7O7-01	1389	0	-0.0998896	Low	1157.16	2562.59	3719.76		TCGA-BR-8366-01	1157.16	2562.59	3719.76
TCGA-FP-7998-01	678	0	-0.11218	Low	501.005	2620.25	3121.25		TCGA-CG-5721-01	501.005	2620.25	3121.25
TCGA-VQ-A8P8-01	942	0	-0.127543	Low	1437.87	1756.56	3194.43		TCGA-BR-4201-01	1437.87	1756.56	3194.43
TCGA-HU-A4H5-01	724	0	-0.138945	Low	-494.648	446.124	-48.5245		TCGA-HU-A4G3-01	-494.648	446.124	-48.5245
TCGA-HU-A4G9-01	736	0	-0.207222	Low	-719.991	887.832	167.841		TCGA-FP-A8CX-01	-719.991	887.832	167.841
TCGA-F1-6874-01	440	0	-0.208075	Low	269.965	64.7202	334.685		TCGA-VQ-A94U-01	269.965	64.7202	334.685
TCGA-HF-7132-01	2351	0	-0.214132	Low	210.363	319.106	529.469		TCGA-BR-6801-01	210.363	319.106	529.469
TCGA-VQ-A8PC-01	1407	1	-0.215044	Low	1013.95	1231.48	2245.42		TCGA-3M-AB47-01	1013.95	1231.48	2245.42
TCGA-D7-A4YX-01	1108	0	-0.22492	Low	436.128	636.224	1072.35		TCGA-D7-6520-01	436.128	636.224	1072.35
TCGA-KB-A93H-01	1145	0	-0.278501	Low	-1040.59	-19.3418	-1059.93		TCGA-VQ-AA6A-01	-1040.59	-19.3418	-1059.93
TCGA-R5-A7ZI-01	2267	0	-0.288712	Low	-390.158	737.968	347.81		TCGA-HF-7134-01	-390.158	737.968	347.81
TCGA-RD-A8MV-01	3720	0	-0.301946	Low	272.857	1466.43	1739.29		TCGA-RD-A7BS-01	272.857	1466.43	1739.29
TCGA-VQ-A91E-01	664	0	-0.316484	Low	2066.66	2336.74	4403.4		TCGA-CG-4462-01	2066.66	2336.74	4403.4
TCGA-HU-8602-01	679	0	-0.346179	Low	1041.76	2284.84	3326.6		TCGA-BR-8081-01	1041.76	2284.84	3326.6
TCGA-CG-4436-01	243	0	-0.348105	Low	-837.718	553.21	-284.507		TCGA-HU-A4H5-01	-837.718	553.21	-284.507
TCGA-VQ-A8P2-01	1160	0	-0.360011	Low	-512.615	1578.26	1065.65		TCGA-CG-5716-01	-512.615	1578.26	1065.65
TCGA-CD-8533-01	468	0	-0.389138	Low	523.206	1078.22	1601.42		TCGA-CG-4441-01	523.206	1078.22	1601.42
TCGA-BR-8373-01	450	0	-0.422495	Low	1584.89	2153.1	3737.99		TCGA-RD-A7BW-01	1584.89	2153.1	3737.99
TCGA-VQ-A8PX-01	1964	0	-0.422765	Low	-923.233	344.926	-578.307		TCGA-D7-8573-01	-923.233	344.926	-578.307
TCGA-D7-6815-01	486	0	-0.484194	Low	-719.789	-427.681	-1147.47		TCGA-CD-8535-01	-719.789	-427.681	-1147.47
TCGA-VQ-A91Z-01	1690	0	-0.511495	Low	62.2128	464.6	526.813		TCGA-D7-6815-01	62.2128	464.6	526.813
TCGA-D7-6528-01	463	0	-0.524591	Low	1652.53	1501.7	3154.23		TCGA-KB-A93G-01	1652.53	1501.7	3154.23
TCGA-IN-AB1X-01	411	0	-0.686902	Low	67.0293	147.872	214.902		TCGA-BR-A44U-01	67.0293	147.872	214.902
TCGA-VQ-AA69-01	864	0	-0.687657	Low	-1412.12	191.677	-1220.44		TCGA-KB-A93H-01	-1412.12	191.677	-1220.44
TCGA-BR-8678-01	754	0	-0.702187	Low	1673.01	2496.81	4169.82		TCGA-BR-4256-01	1673.01	2496.81	4169.82
TCGA-F1-6875-01	2197	1	-0.746254	Low	755.422	2111.51	2866.93		TCGA-BR-8686-01	755.422	2111.51	2866.93
TCGA-VQ-AA6J-01	838	0	-0.754463	Low	1348	1371.97	2719.98		TCGA-BR-8365-01	1348	1371.97	2719.98
TCGA-HF-7133-01	1918	0	-0.847939	Low	524.27	2046.88	2571.15		TCGA-CG-4477-01	524.27	2046.88	2571.15
TCGA-HU-8608-01	641	0	-1.01325	Low	-604.84	1584.08	979.236		TCGA-HU-A4H0-01	-604.84	1584.08	979.236
					1593.48	1545.9	3139.37		TCGA-BR-8364-01	1593.48	1545.9	3139.37
					427.049	2553.62	2980.67		TCGA-CG-5722-01	427.049	2553.62	2980.67
					-762.939	370.057	-392.882		TCGA-F1-6177-01	-762.939	370.057	-392.882
					-796.205	782.062	-14.1437		TCGA-VQ-A8E0-01	-796.205	782.062	-14.1437
					-650.69	-310.584	-961.274		TCGA-BR-8483-01	-650.69	-310.584	-961.274
					838.791	1668.62	2507.41		TCGA-BR-4363-01	838.791	1668.62	2507.41
					-676.031	660.49	-15.5408		TCGA-CG-4440-01	-676.031	660.49	-15.5408
					1607.3	2574.52	4181.82		TCGA-CD-5803-01	1607.3	2574.52	4181.82
					-76.8937	1390.48	1313.58		TCGA-HU-A4H6-01	-76.8937	1390.48	1313.58
					-1145.61	345.089	-800.522		TCGA-IN-A6RJ-01	-1145.61	345.089	-800.522
					-385.439	1099.54	714.097		TCGA-HU-A4G8-01	-385.439	1099.54	714.097
					-108.562	1472.5	1363.94		TCGA-CG-5717-01	-108.562	1472.5	1363.94
					97.4993	-32.5854	64.9139		TCGA-VQ-A91Q-01	97.4993	-32.5854	64.9139
					1275.47	1339.31	2614.78		TCGA-VQ-A94P-01	1275.47	1339.31	2614.78
					543.188	1500.17	2043.36		TCGA-BR-6565-01	543.188	1500.17	2043.36
					-1689.93	-732.404	-2422.34		TCGA-VQ-A91Z-01	-1689.93	-732.404	-2422.34
					-3.53606	2010.84	2007.31		TCGA-BR-6454-01	-3.53606	2010.84	2007.31
					-496.761	1282.29	785.525		TCGA-IN-A6RS-01	-496.761	1282.29	785.525
					723.359	1443.11	2166.47		TCGA-CD-5804-01	723.359	1443.11	2166.47
					-601.527	454.968	-146.559		TCGA-VQ-A94O-01	-601.527	454.968	-146.559
					322.212	993.506	1315.72		TCGA-BR-8286-01	322.212	993.506	1315.72
					193.217	1353.4	1546.61		TCGA-IN-A7NU-01	193.217	1353.4	1546.61
					421.795	703.656	1125.45		TCGA-B7-A5TI-01	421.795	703.656	1125.45
					586.701	780.702	1367.4		TCGA-BR-8683-01	586.701	780.702	1367.4
					-938.433	-612.676	-1551.11		TCGA-F1-6875-01	-938.433	-612.676	-1551.11
					-385.299	653.899	268.6		TCGA-CD-A48A-01	-385.299	653.899	268.6
					1193.5	1047.23	2240.73		TCGA-CD-8530-01	1193.5	1047.23	2240.73
					410.158	889.656	1299.81		TCGA-IP-7968-01	410.158	889.656	1299.81
					-223.752	430.583	206.831		TCGA-VQ-A8PB-01	-223.752	430.583	206.831
					-1046.5	-718.513	-1765.01		TCGA-BR-A4CR-01	-1046.5	-718.513	-1765.01
					886.252	867.953	1754.21		TCGA-D7-8578-01	886.252	867.953	1754.21
					-461.518	431.28	-30.2378		TCGA-D7-6822-01	-461.518	431.28	-30.2378
					247.967	1957.93	2205.9		TCGA-CG-5723-01	247.967	1957.93	2205.9
					-372.663	1156.74	784.073		TCGA-BR-8361-01	-372.663	1156.74	784.073
					422.071	1175.67	1597.74		TCGA-F1-A72C-01	422.071	1175.67	1597.74
					1753.49	2243.51	3997.01		TCGA-D7-A748-01	1753.49	2243.51	3997.01
					1170.15	1883.72	3053.87		TCGA-BR-4367-01	1170.15	1883.72	3053.87
					-1370.49	677.353	-693.138		TCGA-VQ-A8PX-01	-1370.49	677.353	-693.138
					-494.855	1577.98	1083.12		TCGA-BR-8676-01	-494.855	1577.98	1083.12
					1163.09	1426.17	2589.27		TCGA-CG-5719-01	1163.09	1426.17	2589.27
					-58.1276	1747.42	1689.29		TCGA-B7-5818-01	-58.1276	1747.42	1689.29
					641.638	2296.23	2937.87		TCGA-HU-8604-01	641.638	2296.23	2937.87
					-783.377	125.451	-657.927		TCGA-IN-7806-01	-783.377	125.451	-657.927
					-1688.2	-359.791	-2047.99		TCGA-HU-A4G9-01	-1688.2	-359.791	-2047.99
					1076.88	1336.92	2413.8		TCGA-CD-5798-01	1076.88	1336.92	2413.8
					-926.366	1010.06	83.698		TCGA-HJ-7597-01	-926.366	1010.06	83.698
					-133.967	2194.77	2060.8		TCGA-R5-A7ZI-01	-133.967	2194.77	2060.8
					1611.05	3034.76	4645.82		TCGA-HU-A4GY-01	1611.05	3034.76	4645.82
					121.784	2093.17	2214.96		TCGA-D7-5577-01	121.784	2093.17	2214.96
					-639.254	369.529	-269.725		TCGA-CD-5800-01	-639.254	369.529	-269.725
					-206.524	1093.43	886.908		TCGA-BR-8487-01	-206.524	1093.43	886.908
					-438.256	401.274	-36.9822		TCGA-VQ-A8DZ-01	-438.256	401.274	-36.9822
					813.969	1683.48	2497.45		TCGA-CG-4304-01	813.969	1683.48	2497.45
					212.964	1515.01	1727.97		TCGA-VQ-A8PC-01	212.964	1515.01	1727.97
					314.64	143.939	458.579		TCGA-BR-8679-01	314.64	143.939	458.579
					292.38	1810.89	2103.27		TCGA-D7-A6EZ-01	292.38	1810.89	2103.27
					811.666	674.464	1486.13		TCGA-BR-8367-01	811.666	674.464	1486.13
					28.0855	1335.3	1363.38		TCGA-D7-A6F2-01	28.0855	1335.3	1363.38
					536.259	2258.78	2795.04		TCGA-VQ-A8PD-01	536.259	2258.78	2795.04
					308.012	2401.4	2709.41		TCGA-CG-5734-01	308.012	2401.4	2709.41
					-601.725	1349.13	747.405		TCGA-VQ-A8E3-01	-601.725	1349.13	747.405
					-162.1	1013.48	851.381		TCGA-BR-7707-01	-162.1	1013.48	851.381
					-1108.95	586.012	-522.933		TCGA-VQ-A8PH-01	-1108.95	586.012	-522.933
					-1325	-39.2846	-1364.29		TCGA-IN-A6RI-01	-1325	-39.2846	-1364.29
					936.077	1441.09	2377.16		TCGA-ZQ-A9CR-01	936.077	1441.09	2377.16
					1884.62	2978.28	4862.9		TCGA-D7-6522-01	1884.62	2978.28	4862.9
					372.662	1885.33	2258		TCGA-HF-7132-01	372.662	1885.33	2258
					-997.185	115.545	-881.641		TCGA-VQ-A91N-01	-997.185	115.545	-881.641
					506.174	749.143	1255.32		TCGA-VQ-A94R-01	506.174	749.143	1255.32
					52.4526	1714.42	1766.88		TCGA-BR-6802-01	52.4526	1714.42	1766.88
					876.783	1672.72	2549.51		TCGA-D7-A747-01	876.783	1672.72	2549.51
					1556.98	2471.21	4028.19		TCGA-FP-8210-01	1556.98	2471.21	4028.19
					573.799	1681.49	2255.29		TCGA-D7-A4Z0-01	573.799	1681.49	2255.29
					-662.056	1450.64	788.587		TCGA-KB-A6F7-01	-662.056	1450.64	788.587
					919.974	682.55	1602.52		TCGA-BR-8380-01	919.974	682.55	1602.52
					327.674	1046.12	1373.79		TCGA-BR-7851-01	327.674	1046.12	1373.79
					373.916	1148.91	1522.83		TCGA-BR-8485-01	373.916	1148.91	1522.83
					-992.281	57.5613	-934.72		TCGA-CG-4466-01	-992.281	57.5613	-934.72
					1286.84	1493.1	2779.94		TCGA-BR-8592-01	1286.84	1493.1	2779.94
					4.47262	1486.27	1490.74		TCGA-CG-5718-01	4.47262	1486.27	1490.74
					-403.378	1237.5	834.123		TCGA-BR-4280-01	-403.378	1237.5	834.123
					733.007	2455.67	3188.67		TCGA-VQ-A8PF-01	733.007	2455.67	3188.67
					542.202	2849.96	3392.17		TCGA-BR-4253-01	542.202	2849.96	3392.17
					-249.88	547.043	297.163		TCGA-CD-A4MH-01	-249.88	547.043	297.163
					-1256.22	-157.986	-1414.21		TCGA-R5-A7ZF-01	-1256.22	-157.986	-1414.21
					282.139	3111.45	3393.59		TCGA-HU-A4GJ-01	282.139	3111.45	3393.59
					79.3115	173.879	253.19		TCGA-BR-8369-01	79.3115	173.879	253.19
					-1316.44	-442.574	-1759.01		TCGA-R5-A7ZE-01	-1316.44	-442.574	-1759.01
					-173.934	1700.05	1526.12		TCGA-HU-A4H4-01	-173.934	1700.05	1526.12
					515.671	2129.89	2645.56		TCGA-D7-A4YU-01	515.671	2129.89	2645.56
					-1164.65	110.28	-1054.37		TCGA-CG-5726-01	-1164.65	110.28	-1054.37
					1675.72	1842.18	3517.9		TCGA-BR-8291-01	1675.72	1842.18	3517.9
					1005.01	2002.36	3007.37		TCGA-BR-8284-01	1005.01	2002.36	3007.37
					270.843	1645.06	1915.9		TCGA-VQ-A8PM-01	270.843	1645.06	1915.9
					-1391.38	96.0608	-1295.32		TCGA-IN-A6RO-01	-1391.38	96.0608	-1295.32
					33.2695	586.524	619.793		TCGA-VQ-A8P3-01	33.2695	586.524	619.793
					-9.3119	540.54	531.228		TCGA-CD-8528-01	-9.3119	540.54	531.228
					-411.47	636.016	224.546		TCGA-CD-8527-01	-411.47	636.016	224.546
					-799.423	213.754	-585.668		TCGA-HU-A4GU-01	-799.423	213.754	-585.668
					-6.11941	2877.12	2871		TCGA-IN-7808-01	-6.11941	2877.12	2871
					171.007	1279.03	1450.03		TCGA-BR-6452-01	171.007	1279.03	1450.03
					684.104	1679.5	2363.61		TCGA-BR-6566-01	684.104	1679.5	2363.61
					864.866	1256.69	2121.56		TCGA-BR-8060-01	864.866	1256.69	2121.56
					501.129	1470.65	1971.78		TCGA-CG-4306-01	501.129	1470.65	1971.78
					1017.95	457.631	1475.58		TCGA-MX-A663-01	1017.95	457.631	1475.58
					-672.28	890.78	218.499		TCGA-HU-8249-01	-672.28	890.78	218.499
					101.835	824.745	926.58		TCGA-CD-8526-01	101.835	824.745	926.58
					-49.5381	936.809	887.271		TCGA-VQ-A91D-01	-49.5381	936.809	887.271
					-213.54	200.431	-13.1096		TCGA-3M-AB46-01	-213.54	200.431	-13.1096
					-252.573	433.656	181.083		TCGA-VQ-A8DU-01	-252.573	433.656	181.083
					-1287.17	234.415	-1052.76		TCGA-HU-A4H8-01	-1287.17	234.415	-1052.76
					605.142	1368.59	1973.73		TCGA-BR-8371-01	605.142	1368.59	1973.73
					223.206	2012.05	2235.25		TCGA-RD-A7C1-01	223.206	2012.05	2235.25
					561.317	946.49	1507.81		TCGA-CD-8524-01	561.317	946.49	1507.81
					1408.55	1787.18	3195.74		TCGA-BR-8080-01	1408.55	1787.18	3195.74
					860.447	1714.14	2574.59		TCGA-BR-4257-01	860.447	1714.14	2574.59
					240.937	1479.95	1720.89		TCGA-CD-8525-01	240.937	1479.95	1720.89
					-64.1805	1008.62	944.442		TCGA-R5-A7O7-01	-64.1805	1008.62	944.442
					-74.4274	745.199	670.771		TCGA-D7-6527-01	-74.4274	745.199	670.771
					1125.4	776.114	1901.51		TCGA-BR-7959-01	1125.4	776.114	1901.51
					1134.83	1850.06	2984.89		TCGA-D7-6521-01	1134.83	1850.06	2984.89
					-662.531	1709.99	1047.46		TCGA-CG-5732-01	-662.531	1709.99	1047.46
					-833.61	929.045	95.4347		TCGA-FP-8211-01	-833.61	929.045	95.4347
					-113.655	1032.01	918.357		TCGA-VQ-A924-01	-113.655	1032.01	918.357
					157.13	1185.02	1342.15		TCGA-VQ-A8P8-01	157.13	1185.02	1342.15
					487.95	621.288	1109.24		TCGA-BR-A4J8-01	487.95	621.288	1109.24
					-1752.39	-35.2171	-1787.61		TCGA-HU-8244-01	-1752.39	-35.2171	-1787.61
					142.854	1891.26	2034.11		TCGA-BR-8296-01	142.854	1891.26	2034.11
					575.58	1869.69	2445.27		TCGA-CG-4437-01	575.58	1869.69	2445.27
					-948.663	756.614	-192.049		TCGA-VQ-AA68-01	-948.663	756.614	-192.049
					-1041.52	-643.898	-1685.42		TCGA-BR-8680-01	-1041.52	-643.898	-1685.42
					1246.07	1792.85	3038.92		TCGA-CG-4476-01	1246.07	1792.85	3038.92
					833.736	2774.07	3607.81		TCGA-BR-A44T-01	833.736	2774.07	3607.81
					955.068	1686.63	2641.7		TCGA-VQ-A91Y-01	955.068	1686.63	2641.7
					-1175.39	-414.785	-1590.17		TCGA-VQ-A8DV-01	-1175.39	-414.785	-1590.17
					1531.59	2428.82	3960.41		TCGA-BR-6563-01	1531.59	2428.82	3960.41
					-1580.31	-81.0663	-1661.38		TCGA-HU-A4GD-01	-1580.31	-81.0663	-1661.38
					788.935	1311.81	2100.75		TCGA-CD-A489-01	788.935	1311.81	2100.75
					-220.202	1161.35	941.148		TCGA-HF-7131-01	-220.202	1161.35	941.148
					-604.863	562.247	-42.617		TCGA-IN-A6RL-01	-604.863	562.247	-42.617
					1478.5	821.494	2299.99		TCGA-BR-A4IV-01	1478.5	821.494	2299.99
					909.045	721.092	1630.14		TCGA-CG-4475-01	909.045	721.092	1630.14
					336.499	1140.04	1476.54		TCGA-BR-4369-01	336.499	1140.04	1476.54
					-762.762	573.559	-189.203		TCGA-BR-A4QL-01	-762.762	573.559	-189.203
					372.149	1915.56	2287.71		TCGA-HU-8610-01	372.149	1915.56	2287.71
					715.065	1965.8	2680.87		TCGA-BR-4357-01	715.065	1965.8	2680.87
					327.041	83.5527	410.593		TCGA-BR-7715-01	327.041	83.5527	410.593
					-324.826	587.678	262.853		TCGA-BR-6710-01	-324.826	587.678	262.853
					1173.01	2012.08	3185.09		TCGA-BR-A4J7-01	1173.01	2012.08	3185.09
					141.365	413.078	554.444		TCGA-FP-7829-01	141.365	413.078	554.444
					-1384.97	-253.365	-1638.33		TCGA-VQ-AA6D-01	-1384.97	-253.365	-1638.33
					-154.537	90.8611	-63.6754		TCGA-FP-8631-01	-154.537	90.8611	-63.6754
					771.742	2485.06	3256.8		TCGA-BR-7958-01	771.742	2485.06	3256.8
					-1173.11	481.429	-691.676		TCGA-RD-A7BT-01	-1173.11	481.429	-691.676
					1023.27	1420.24	2443.51		TCGA-D7-8579-01	1023.27	1420.24	2443.51
					-591.714	-325.643	-917.358		TCGA-VQ-A92D-01	-591.714	-325.643	-917.358
					-404.296	1185.44	781.144		TCGA-VQ-A91U-01	-404.296	1185.44	781.144
					537.729	2397.11	2934.84		TCGA-RD-A8N1-01	537.729	2397.11	2934.84
					213.592	295.238	508.83		TCGA-VQ-A928-01	213.592	295.238	508.83
					874.543	1131.54	2006.09		TCGA-BR-8682-01	874.543	1131.54	2006.09
					1518.44	2387.18	3905.62		TCGA-MX-A5UG-01	1518.44	2387.18	3905.62
					-419.251	37.1624	-382.088		TCGA-VQ-A8E7-01	-419.251	37.1624	-382.088
					-518.063	877.66	359.597		TCGA-D7-A6F0-01	-518.063	877.66	359.597
					550.187	1863.01	2413.19		TCGA-BR-8484-01	550.187	1863.01	2413.19
					2022.61	2145.26	4167.87		TCGA-BR-4279-01	2022.61	2145.26	4167.87
					-24.064	889.914	865.85		TCGA-VQ-A8PP-01	-24.064	889.914	865.85
					-402.918	1074.58	671.657		TCGA-IN-A7NR-01	-402.918	1074.58	671.657
					1347.31	1553.14	2900.46		TCGA-RD-A8N9-01	1347.31	1553.14	2900.46
					2052.1	2179.31	4231.41		TCGA-BR-4187-01	2052.1	2179.31	4231.41
					-809.773	467.962	-341.811		TCGA-IN-A6RR-01	-809.773	467.962	-341.811
					-96.9628	196.603	99.6406		TCGA-BR-8687-01	-96.9628	196.603	99.6406
					-675.892	518.248	-157.644		TCGA-HU-A4GT-01	-675.892	518.248	-157.644
					96.7022	2691.21	2787.91		TCGA-CG-5728-11	96.7022	2691.21	2787.91
					-1410.92	-503.559	-1914.48		TCGA-IN-8663-11	-1410.92	-503.559	-1914.48
					198.521	1734.85	1933.37		TCGA-CG-5722-11	198.521	1734.85	1933.37
					-110.593	1386.87	1276.27		TCGA-CG-5730-11	-110.593	1386.87	1276.27
					-842.385	800.675	-41.7107		TCGA-HU-8238-11	-842.385	800.675	-41.7107
					969.353	156.407	1125.76		TCGA-HU-A4HB-11	969.353	156.407	1125.76
					217.961	2169.42	2387.38		TCGA-BR-6454-11	217.961	2169.42	2387.38
					-550.442	-115.816	-666.258		TCGA-IN-AB1V-11	-550.442	-115.816	-666.258
					-287.214	1890.09	1602.87		TCGA-CG-5720-11	-287.214	1890.09	1602.87
					38.6528	2299.45	2338.1		TCGA-CG-5733-11	38.6528	2299.45	2338.1
					-195.838	2064.44	1868.6		TCGA-CG-5721-11	-195.838	2064.44	1868.6
					526.288	2890.7	3416.98		TCGA-BR-7717-11	526.288	2890.7	3416.98
					140.703	1810.25	1950.95		TCGA-BR-6457-11	140.703	1810.25	1950.95
					746.652	220.413	967.065		TCGA-FP-7735-11	746.652	220.413	967.065
					951.145	360.008	1311.15		TCGA-HU-A4GP-11	951.145	360.008	1311.15
					613.497	1334.21	1947.71		TCGA-BR-8060-11	613.497	1334.21	1947.71
					986.635	22.2787	1008.91		TCGA-FP-7829-11	986.635	22.2787	1008.91
					849.549	1260.1	2109.65		TCGA-BR-7704-11	849.549	1260.1	2109.65
					54.794	1887.62	1942.41		TCGA-BR-6453-11	54.794	1887.62	1942.41
					-238.728	1627.55	1388.82		TCGA-BR-7703-11	-238.728	1627.55	1388.82
					-23.5935	1418.17	1394.58		TCGA-CG-5734-11	-23.5935	1418.17	1394.58
					1121.49	303.822	1425.31		TCGA-HU-A4GH-11	1121.49	303.822	1425.31
					595.428	3119.66	3715.09		TCGA-BR-7715-11	595.428	3119.66	3715.09
					-35.5212	1528.02	1492.5		TCGA-BR-6802-11	-35.5212	1528.02	1492.5
					-264.276	1181.29	917.012		TCGA-BR-7851-11	-264.276	1181.29	917.012
					786.208	258.368	1044.58		TCGA-HU-A4GC-11	786.208	258.368	1044.58
					535.919	388.585	924.504		TCGA-HU-A4GN-11	535.919	388.585	924.504
					-763.04	-472.964	-1236		TCGA-IN-AB1X-11	-763.04	-472.964	-1236
					926.06	123.772	1049.83		TCGA-HU-A4GY-11	926.06	123.772	1049.83
					-1248.45	-205.716	-1454.17		TCGA-IN-7806-11	-1248.45	-205.716	-1454.17
					22.1626	395.686	417.849		TCGA-IP-7968-11	22.1626	395.686	417.849
					127.003	1627.41	1754.42		TCGA-BR-7716-11	127.003	1627.41	1754.42
