# Supplementary material for: Development and Verification of Ferroptosis-Related Gene Signature for Predicting the Prognosis and Immune Microenvironment in Gastric Cancer
Source: Research Square preprint supplement (doi:10.21203/rs.3.rs-1235765/v1), 2022-02-07
Supplement: Supplementary file 3 [file 9004c27f336cf7f2d6b620b4.xlsx]

## Sheet: Sheet1
ID	TCGA-CD-8529	TCGA-CG-4443	TCGA-BR-7197	TCGA-D7-A6EV	TCGA-ZA-A8F6	TCGA-RD-A8N2	TCGA-IN-8462	TCGA-D7-A4YX	TCGA-BR-7716	TCGA-BR-8373	TCGA-CG-4301	TCGA-FP-7916	TCGA-RD-A8N5	TCGA-CD-8534	TCGA-CG-4469	TCGA-BR-8295	TCGA-VQ-A91V	TCGA-BR-7901	TCGA-CG-5725	TCGA-HU-A4HB	TCGA-BR-6456	TCGA-R5-A7ZR	TCGA-D7-6818	TCGA-IN-8663	TCGA-CD-8533	TCGA-BR-4294	TCGA-VQ-A8PK	TCGA-RD-A8N6	TCGA-BR-7957	TCGA-D7-8574	TCGA-IN-A6RN	TCGA-FP-7998	TCGA-HU-A4GH	TCGA-VQ-AA6F	TCGA-CG-4436	TCGA-BR-6457	TCGA-CG-4465	TCGA-BR-4267	TCGA-HU-A4GQ	TCGA-HU-A4H3	TCGA-HF-7133	TCGA-B7-A5TJ	TCGA-HU-A4GP	TCGA-KB-A93J	TCGA-VQ-A927	TCGA-BR-6455	TCGA-F1-A448	TCGA-SW-A7EA	TCGA-VQ-AA6J
ESM1	2.11206	3.25654	2.27497	-0.0989881	-1.51776	-1.92912	-0.664496	3.05652	0.224329	0.290003	2.38402	0.918928	2.26928	-2.5838	1.64474	2.27524	0.297809	2.62465	3.18721	-0.00487083	1.50035	1.37247	1.22676	1.05903	0.587559	-0.892933	1.7859	0.490661	1.48234	-0.0612306	3.03735	-0.789276	1.23209	1.29476	2.04972	1.59246	0.444772	1.67848	-1.22159	0.862285	1.26784	1.33081	1.04341	0.0358218	-1.28351	1.5064	2.51794	2.20014	1.83871
MTHFD1L	2.4853	0.539492	2.80709	3.18244	1.57882	1.20168	1.5411	4.06362	2.12358	2.64493	3.14195	2.69609	2.21729	2.01367	1.5759	3.39298	1.96934	2.06993	2.3574	2.24002	3.13757	1.95399	2.1623	4.03292	3.34656	0.824087	2.38328	1.57943	2.72995	1.75861	1.54425	2.89354	1.68373	2.27825	3.41422	2.00248	2.68734	1.5774	3.06926	2.75149	3.67563	2.7113	2.23621	1.26427	1.93127	3.37934	2.46399	3.71534	3.13994
MIR4435-2HG	1.27281	0.283685	1.79362	0.984762	0.276148	-0.450892	1.00025	2.39205	0.261992	0.255756	1.61617	1.56626	2.63259	-0.294832	0.998748	0.924396	1.16827	1.63101	0.647317	0.642649	1.19382	0.836164	0.907753	3.37712	0.214835	-1.60369	2.36345	0.481975	0.406341	0.856359	0.633257	1.32614	1.1782	1.59821	1.31893	0.890388	0.903919	0.461358	1.20759	1.79986	0.668964	1.13363	1.07673	0.575175	0.488294	0.10217	1.76382	2.74907	1.97699
KIF14	0.504746	0.349173	0.991611	1.54434	-0.295098	-2.36218	-0.573993	1.44014	0.842254	0.338619	0.172558	0.840402	-0.270842	0.873349	1.81061	2.65617	0.661804	0.118389	1.38146	0.819329	1.11853	0.644612	1.19359	2.74174	2.46742	-5.32599	1.8403	1.32719	0.767551	-1.02933	0.676804	1.11157	1.59382	1.00368	1.66017	-1.78511	1.46211	1.4479	2.0093	1.34166	2.30499	1.07942	1.53176	0.908489	0.523126	0.631244	0.450098	1.04908	1.81661
CLSPN	1.84479	-0.000986491	1.82327	2.56216	-0.291192	-1.72114	0.690375	2.37784	1.05833	1.05301	-0.566936	1.72067	0.836697	1.58465	0.94639	2.93884	1.62294	0.616876	1.23982	1.65456	1.435	1.73516	1.49966	2.53845	2.31971	-4.48351	1.7791	0.451499	1.6302	0.318688	0.910799	1.73216	1.86572	1.78947	0.870273	-0.427367	1.32012	-0.187558	1.74919	0.877335	3.4367	0.737892	1.81728	2.08412	1.42178	1.6824	1.66086	1.92461	1.6451
NFE2L3	3.10549	3.2416	3.88183	3.32441	4.12105	1.3493	3.05804	4.22687	4.31988	3.92702	3.46901	4.87427	3.81554	4.61562	3.61391	5.06366	3.34099	4.76244	2.34396	3.14188	5.91434	4.03176	3.01264	2.97715	3.14858	4.78599	2.90171	5.13561	3.40137	3.97021	3.30729	5.23063	2.7094	4.51759	5.10993	3.66247	4.46101	4.68156	5.70975	4.56131	4.19038	4.13567	3.06051	3.91017	2.32492	4.20969	3.71875	3.55357	4.05378
ACAN	0.0915665	1.83242	0.18711	-0.905005	-1.29775	-4.59385	0.851155	-0.0496933	-0.395942	-0.190069	0.124969	-0.0574599	1.48399	-0.395419	-1.06957	0.656346	-3.65966	0.743748	0.684303	-2.6674	2.66563	-1.56026	0.133888	-1.10751	-0.94858	-4.74004	0.381295	-2.02094	-0.662491	-1.69663	-1.14663	0.406033	-1.17711	0.629433	0.516016	0.33763	0.276963	0.49873	-0.238621	0.706104	0.140748	-0.180418	-1.39296	0.432914	-3.75511	-0.16774	1.56628	-2.29592	0.00111679
ECT2	3.95355	3.42924	3.57756	5.26195	2.40089	0.775116	2.40728	5.35875	3.70904	3.78103	4.43405	5.39675	3.1181	3.26953	4.88767	3.45651	4.15578	3.66492	4.53243	3.16048	3.98626	4.03957	3.62586	4.4301	3.9215	0.848572	5.43701	3.77456	3.71691	1.96349	4.42202	4.91215	4.23667	5.26155	5.14264	1.99181	4.62609	4.70686	4.37926	5.17479	5.3477	4.3288	4.41799	3.52699	3.4443	3.83323	4.13882	4.79649	4.92942
INHBA	4.04099	1.64152	2.52315	2.46178	0.898734	1.57657	1.86398	1.90263	3.00012	3.80824	4.11073	2.91497	4.71932	-0.183066	1.22649	1.65706	-0.725004	3.9827	1.79988	0.326309	4.81758	0.456658	2.66919	4.07444	2.73827	-1.72224	4.35451	2.35898	4.17767	3.71726	1.05483	1.92583	0.773343	-0.576152	2.14085	3.26423	3.55111	2.81343	3.45854	3.71235	1.65075	2.41575	0.734871	1.21527	-0.0930691	2.58283	5.28782	4.17474	1.42324
STIL	1.49905	1.5579	1.83203	3.28918	0.793647	-1.56199	0.715589	3.00447	1.96762	1.98989	0.823164	2.63644	0.929599	1.61624	2.85029	2.39242	2.00775	1.92492	1.19801	1.83095	2.32776	2.12618	1.76642	2.27926	2.19788	-1.78444	3.81317	1.41279	2.31256	0.672863	1.44786	2.70957	3.07039	2.69627	2.85015	0.0310946	2.71909	1.94684	1.79689	2.07086	3.69792	1.08215	1.95441	1.34754	1.61617	2.50185	2.02547	2.16814	2.89005
KIF18B	2.7087	1.23499	2.80486	3.67567	1.05186	-1.74865	1.13697	2.94912	2.56185	2.56438	0.436696	2.58084	1.12516	2.33101	2.3008	3.25845	2.23379	2.32266	3.1464	2.46939	2.71503	2.80931	3.30227	2.85487	3.18558	-4.56595	3.53157	2.66914	2.33579	1.31114	1.30429	2.88953	3.3682	2.65215	2.41056	0.775392	1.85407	0.614518	2.13252	3.29853	3.14329	2.29974	2.71727	2.53667	1.63143	3.01499	2.05709	2.5324	3.91441
KIF23	1.92704	1.72634	2.73582	3.09937	0.740131	-0.783791	1.41784	2.47216	2.33752	1.51966	1.65503	2.0588	1.22938	1.59058	2.9749	3.11351	1.70503	1.17669	2.59995	1.52271	2.24369	2.55084	2.27067	3.70123	3.73653	-2.69812	4.99244	2.45887	1.78568	0.574336	1.6931	2.05323	3.1147	1.37261	2.74893	0.112067	2.74949	0.578412	2.18341	2.40105	3.21406	1.45685	1.87304	2.18101	1.52654	2.62099	1.68619	2.44461	3.10687
CEP55	2.75815	2.55101	3.99641	4.05886	2.12789	-0.515232	1.96295	3.70583	3.79245	2.86219	2.6172	3.56114	2.41282	2.91539	4.24955	2.00781	3.56552	2.84707	2.59756	3.03629	2.97003	2.90333	3.57443	5.23596	3.7776	-2.26549	3.79569	2.95686	2.90733	1.57027	2.13527	3.23099	3.97891	3.28705	4.14957	1.16806	3.76898	2.73393	3.76502	3.52535	4.61399	3.24946	4.32129	3.11803	2.82564	3.41022	3.97055	4.37596	4.39075
ASPM	0.751754	0.724389	1.76873	2.72451	0.904986	-1.7038	0.221403	2.63283	1.3916	1.38247	0.720172	1.79102	0.676859	1.60936	3.01714	3.04402	1.32906	0.895425	2.07303	1.74528	1.98096	2.04714	2.05582	3.07083	3.6701	-2.86953	2.68551	2.02813	1.25341	0.485707	0.279392	2.22804	2.9246	1.51558	2.71609	-0.992436	2.53183	1.94614	2.9359	2.11419	2.73705	1.90463	2.08697	1.50977	1.50424	2.23377	1.51652	2.13851	2.61445
HELLS	0.756854	0.0616424	1.8449	2.44202	0.318345	-1.48366	0.210568	2.57079	1.06445	0.936545	1.16604	2.09646	0.934505	2.5952	1.84392	1.17197	1.39049	0.476202	0.882683	1.81728	1.043	1.17997	0.984441	2.13447	3.53507	-2.07785	1.33141	1.43866	1.69574	1.13121	0.279486	2.2469	1.20354	2.18786	1.61427	-1.10406	1.76764	1.08561	1.45131	2.07952	2.29425	0.739899	1.54661	0.939724	1.49053	1.91599	1.41177	2.01323	2.28002
ZWILCH	2.1645	2.80064	2.82881	3.16923	1.21407	0.334221	1.08305	2.48489	2.46317	2.31516	2.56078	2.07667	1.80801	2.5988	3.06784	2.9172	2.69571	1.89854	3.42364	1.95884	2.35905	2.58379	1.70672	3.21163	3.83938	0.869459	2.15647	2.17831	3.10073	1.55817	2.89199	1.95162	2.7181	1.87803	2.72972	0.56047	2.98864	1.26271	2.5598	2.31444	3.10477	1.79405	2.77073	2.29938	2.3713	2.68762	2.20114	2.2581	2.97117
IQGAP3	3.67902	1.69254	2.9845	4.26476	2.07386	-0.631678	2.14704	4.55637	2.65671	2.82961	2.15415	3.73752	1.57143	3.05151	3.89342	3.66612	4.12521	3.49007	2.69565	1.7655	4.16644	3.65268	3.31769	3.49573	3.96694	-3.2462	4.04142	2.92511	2.65125	1.68288	1.90896	3.70565	5.39598	3.06005	3.15925	1.04216	2.86612	2.42473	2.37608	3.72713	3.91632	3.54014	4.60065	3.77804	2.9294	3.32353	2.56628	3.44995	4.21238
RUNX1	3.32169	4.43841	3.17564	2.50917	2.16493	1.4582	2.09858	3.37665	2.54057	3.80163	3.83405	3.87596	3.19023	3.29583	2.22565	2.85755	2.49693	3.50908	2.26364	2.20698	3.60516	2.04341	2.95329	5.00209	2.15785	1.42073	2.73237	2.2845	4.16559	3.39747	2.82968	3.4788	3.46725	2.21959	2.53586	3.37634	2.40902	3.40041	2.81551	1.81128	2.79223	2.40052	2.50859	2.59465	3.22537	5.26273	2.92663	2.84386	3.10945
CST1	7.89607	6.03871	1.16471	5.52529	1.8944	1.36334	5.32094	5.29791	8.21948	4.28628	6.90255	5.2965	7.51673	-2.00654	1.04836	3.83067	3.10236	5.97788	6.89998	4.31175	7.51046	4.21148	6.93454	4.5963	5.2616	-4.26505	3.93972	6.2065	5.41987	0.171795	5.49494	4.44567	3.26693	5.2267	4.89262	6.48676	-0.232845	7.17642	6.27458	4.85515	7.31402	6.55196	1.02381	3.61341	-0.865079	6.46073	2.26936	2.96345	2.3843
CENPF	2.29408	2.3422	3.41509	3.58318	1.60297	-0.420721	1.32275	3.45587	2.67803	2.80662	1.54549	2.77811	1.40865	2.44727	3.53761	4.10968	2.34867	2.04803	3.40049	2.38013	1.69309	2.29027	3.94512	3.86794	4.71223	-1.74932	4.09165	2.60984	2.72578	1.16095	1.03476	3.40921	3.9127	2.59496	3.52587	0.480833	3.06034	2.4932	3.82411	3.37556	3.78298	3.1435	1.89598	2.54626	2.47659	3.58062	2.38571	2.60659	3.77495
E2F3	2.4885	1.82972	2.43358	2.40509	1.66742	0.893233	1.58052	2.58046	3.08679	3.33033	2.66682	2.35288	1.35341	2.38902	2.46163	3.22833	2.09988	1.97468	2.95194	2.22025	2.15893	2.2148	2.31838	2.58771	3.09624	1.52054	2.04405	1.9273	2.22475	2.11878	1.693	2.51057	1.46637	2.24907	3.04274	0.936024	1.971	2.59297	2.29195	2.29778	3.23554	2.5052	2.23669	2.0292	1.42214	2.3281	2.22091	1.56636	1.82369
MKI67	4.0589	3.81223	4.73581	5.50562	3.28309	-0.0580958	2.53367	5.11386	4.27796	3.97637	2.64904	4.33321	3.36939	4.50008	4.88008	3.9797	3.9978	3.33438	4.79247	3.78795	4.82754	4.05117	5.14015	5.33223	5.48433	-1.92557	4.45022	3.92221	4.34061	2.89442	2.54201	4.60085	4.51438	4.0949	4.51623	2.78585	4.84374	3.39634	4.81331	4.55825	5.59307	3.93244	4.8736	4.58404	3.93265	4.73209	4.01332	4.29011	4.54848
FOXD2-AS1	0.404414	1.63371	2.51339	2.71348	1.52402	-2.92111	1.32945	2.48855	0.852417	2.26287	-1.42109	1.41324	0.24504	-0.81505	1.45997	2.00918	1.46847	0.953611	-0.271231	1.36243	1.19778	2.6041	2.44571	0.184457	0.732401	-2.98241	0.0529074	2.26983	0.0451459	0.673555	1.60239	1.7414	0.80347	1.05113	1.65972	0.600633	-0.0845983	0.87007	0.114641	1.46959	1.71362	2.13298	1.14658	0.116856	0.790117	0.568789	0.97516	0.922969	0.384789
TPX2	3.86246	3.19319	5.549	5.93884	3.4004	0.296246	3.71884	5.49063	5.38329	4.28369	4.21984	4.68938	3.22127	4.08394	5.31183	6.35224	3.92634	4.77577	5.21454	4.46374	5.74531	4.82337	5.67065	5.31847	6.33718	0.709721	5.97433	5.24317	4.04152	2.60173	3.15318	4.80141	5.20799	4.66699	5.97322	3.31169	4.8016	3.87858	5.35562	5.06265	5.03326	5.20145	5.28827	4.38986	3.58966	5.65395	3.85488	4.92649	5.97264
EXO1	1.69997	0.91871	1.44617	2.15351	-0.420894	-3.71074	-0.254094	2.14326	1.62815	0.419119	0.669707	1.06512	-0.0240202	1.22658	2.1413	3.2738	1.28899	1.51403	2.62177	1.09485	0.481992	0.445591	2.52232	1.50365	3.70359	-2.77531	2.01903	1.05408	1.82629	-0.322529	0.154375	1.35022	1.11226	1.2612	2.43314	-0.451386	1.35234	2.34879	2.29102	1.2325	2.45373	1.38719	0.0843118	1.48965	0.800579	2.22796	1.16202	1.57621	1.37506
DTL	2.01698	1.57199	2.76403	2.66084	0.632119	-1.31749	0.825856	3.08588	1.95243	0.823341	1.64594	2.59558	0.775238	2.38189	2.65761	2.90169	1.857	1.29029	3.18681	1.9979	1.49857	2.11211	2.96384	2.45736	3.87464	-2.67267	2.45696	1.13034	2.48176	0.81664	0.00319675	2.60335	1.55263	2.38818	3.22826	0.584213	2.87002	2.8843	3.08165	2.06861	3.43327	1.69001	1.68626	2.57379	1.75358	3.3898	1.72408	2.67307	2.52855
BUB1	2.2518	1.68786	2.88045	3.87821	1.80512	-1.51678	0.758115	3.18753	2.82835	2.51672	1.9053	2.39746	1.12742	1.33544	3.11927	4.31857	2.09837	2.66666	3.05536	2.60874	3.22628	3.06739	2.69027	3.09457	3.68035	-1.36412	4.03933	2.52606	2.51412	1.07169	0.773337	2.78684	3.64294	3.17463	3.86138	0.571462	3.42361	2.21632	3.12735	2.92022	2.70402	2.73825	3.27307	1.80984	1.81229	3.04101	2.1016	2.88706	3.75788
ARHGAP11A	1.88026	1.42997	3.09305	4.00729	1.22099	-0.687949	1.54358	3.37305	2.20555	1.86189	1.86216	2.40346	1.37087	2.39093	3.06187	3.68249	2.44523	2.26107	1.88757	1.88661	2.30851	3.05932	2.89888	3.54955	3.66908	1.22802	4.61507	2.41294	2.36173	1.41758	1.16976	2.42816	3.20787	1.77542	2.86612	0.352447	3.22839	2.08238	2.77373	3.0393	2.93053	2.17626	2.68414	1.93282	2.00951	2.98223	2.53522	2.95177	3.66895
BUB1B	1.66602	1.80426	3.13626	3.52488	1.31607	-1.58628	0.440681	3.1055	2.69595	1.75056	1.88203	2.06783	1.46621	2.12091	3.18738	3.97666	2.25308	1.61971	3.54281	2.58908	2.79427	3.03581	2.71445	3.14032	3.59418	-1.1013	3.24044	2.7834	2.48647	0.999612	1.47105	1.85448	3.63537	1.92032	3.09057	0.0646237	3.23353	0.845388	2.93325	3.15869	2.45367	2.20246	2.40726	2.75599	1.83039	3.06233	2.17149	2.86858	3.56917
RCC2	5.48043	5.89282	6.00495	6.26177	4.43885	3.292	4.69904	6.15697	5.67239	5.65224	4.7464	6.43181	4.29107	5.12133	5.00854	6.33898	5.03428	5.75075	6.44936	4.96385	5.27542	4.99414	5.35082	6.2872	5.63857	1.99776	5.88851	5.19678	6.30019	5.35011	4.57653	6.12338	4.979	5.17986	4.7032	5.03816	4.92633	4.31793	5.08637	5.512	5.07549	5.44415	4.57233	5.3606	4.71495	6.53071	5.43201	4.99146	6.08238
ANLN	3.29257	2.03376	4.38148	4.19351	2.61595	2.31583	2.62158	4.4988	2.93331	3.35558	2.75847	3.2545	2.39832	3.22641	4.26087	4.19037	4.1492	3.20222	2.74425	2.34123	4.42079	3.43627	3.19971	5.35093	4.39929	-2.29561	4.28327	3.27764	2.92998	1.52476	2.2978	3.49641	3.95256	2.84841	4.73329	0.825867	3.559	3.16073	3.9132	4.89227	4.0505	2.6807	3.5522	3.03716	2.53992	3.13157	2.57781	4.24471	4.35908
HJURP	1.43024	1.70542	3.11155	3.2682	0.448383	-1.89991	1.14774	2.90849	2.68387	1.70819	1.31476	0.467877	0.95026	1.34687	2.87439	4.08902	1.80927	1.60827	3.41038	2.23139	2.83603	2.3135	2.76996	3.35415	3.03894	-2.8941	3.29524	2.69443	1.97413	0.409479	1.3932	1.82562	2.9732	1.97709	2.887	0.710987	2.51224	1.57471	2.41097	3.81711	3.2623	2.37307	1.94913	2.46565	1.44631	3.16314	1.79128	2.53554	3.63998
NEK2	2.30085	2.34027	3.46915	3.24794	1.14136	-1.72917	1.61967	2.65878	2.95286	1.50079	1.5491	2.77685	0.657708	2.28634	3.21918	5.02114	1.94983	2.17531	3.13349	2.05273	1.37024	3.35144	3.60688	2.55001	4.06993	-1.23461	3.61215	3.13693	2.22728	1.0488	1.08578	2.43858	3.63648	1.85701	3.51961	1.0104	3.00449	2.59455	3.66732	3.47394	3.02956	3.2094	2.34018	2.14041	1.43409	3.37726	2.47327	3.15146	3.48606
SOX9	6.32559	5.42563	6.33875	5.78856	5.51144	1.93455	5.8668	5.92669	5.77021	6.69592	5.49113	6.27664	5.45278	6.51142	5.04268	5.49531	6.51651	6.28756	5.10778	5.23041	5.91035	6.345	3.19865	5.90758	4.1694	4.63669	7.16564	6.24663	5.47393	5.16739	6.48157	5.52791	5.61373	6.24393	5.61419	5.59463	7.11498	6.53441	6.23262	7.00584	5.95909	6.26614	5.86264	5.7859	5.51986	6.97866	5.57246	5.97083	5.5636
KIF20A	2.61764	1.53185	1.95849	3.89712	1.46223	-1.0382	1.51347	2.49636	2.85924	2.14694	2.31257	2.60148	1.72227	2.48149	2.9688	4.60039	1.5765	1.60748	2.76747	2.74867	2.97483	3.46101	3.8156	4.17006	3.33102	-2.71045	2.90621	2.93462	3.52222	1.21182	1.28212	1.96878	2.98657	2.82352	2.89175	1.25733	3.04112	2.20473	3.03128	3.66434	3.61379	2.02524	1.96812	2.36013	1.91833	4.08965	2.17831	3.10384	3.55028
CDK1	3.17299	2.54939	3.91049	4.98751	2.11644	-0.706396	2.18892	4.09741	2.69969	2.61652	3.06339	3.36605	2.1151	3.10173	4.17832	4.37992	3.25081	2.74835	4.23873	3.29916	4.10402	4.61469	4.47919	4.81033	4.5963	-1.03382	3.7164	3.14696	3.18482	1.44654	2.89508	2.88133	4.24354	3.02699	3.98481	1.57509	4.21242	3.01601	4.02094	4.26469	4.6099	3.49048	5.04569	3.66763	2.61168	4.43645	3.6508	4.32499	3.92163
TRIM59	0.218814	0.149013	0.161588	0.786136	-0.381985	-0.843999	-0.335188	-1.29035	-0.126891	-0.0387743	1.4117	0.850333	0.111689	0.455997	0.692008	2.20525	-0.377413	-0.0804663	-0.512824	0.582071	0.728336	0.346008	0.0289677	-0.180742	0.992668	-1.30881	1.21435	-0.800476	0.0587361	0.612367	0.564701	-0.341132	0.165097	0.745892	-0.406244	-0.92469	0.29664	0.715018	1.03255	1.23047	0.854087	-1.22061	-0.488931	0.688787	-0.101488	0.375649	0.152221	0.355772	1.35587
NUF2	2.2735	0.795214	2.4406	3.18842	0.145932	-1.89586	0.997561	2.17059	1.65209	1.50249	0.776097	1.73364	0.091322	1.32664	2.53197	4.67024	2.22116	2.36702	2.28992	1.92921	2.13083	2.21922	2.23973	2.36307	3.9423	-2.75254	2.77877	2.44636	1.41611	0.435772	0.986299	1.51401	4.46559	1.36086	3.05996	0.010388	2.02895	1.65839	2.10398	2.68987	3.19282	2.42094	2.41885	1.92604	1.16814	2.50728	1.66267	1.83456	2.77056
SGO1	1.85431	0.443035	1.8277	2.9382	-0.431485	-2.15713	0.588532	1.88421	1.13241	2.03906	-0.17331	0.90099	0.268888	2.18248	1.77667	2.72874	1.07421	1.50333	1.63651	1.73502	0.701707	2.12125	1.53833	2.22354	2.58375	-3.73627	1.77551	0.946554	1.30834	0.733928	1.76907	1.42324	2.37828	0.924834	2.33598	-0.563906	1.86215	1.15909	2.01375	1.5458	2.64745	0.557717	2.29103	0.957313	0.418582	1.98367	1.42607	1.38331	1.61773
CIP2A	1.46504	0.344465	0.970623	2.63961	0.321418	-0.52054	0.540383	1.70802	1.87689	2.07481	0.357352	2.47115	0.132008	1.4319	1.31524	3.23186	0.670063	2.02139	2.12884	1.64295	1.68115	1.93213	1.79864	2.9953	2.173	-0.994715	3.0748	1.55677	1.11325	0.555656	0.743079	1.96488	2.35412	1.80634	2.38279	-1.08983	1.81778	1.13938	1.52166	2.33815	2.32314	1.11306	1.69772	1.60176	0.323489	2.01138	1.6696	1.34076	2.04478
OTX1	0.718608	0.387478	1.67335	0.371624	0.117658	-3.15642	-0.398605	1.76532	0.943993	1.53267	-0.486738	1.58364	-1.54549	1.731	-0.0386099	1.19926	1.35357	0.788492	1.76297	0.210598	0.765539	0.500604	-0.196951	-0.852498	1.75939	-1.14062	0.601592	1.2752	-0.144066	-2.12287	1.69494	0.657597	1.99577	0.783393	0.634039	0.296566	0.0403909	0.963544	0.473119	2.98987	1.1107	1.34033	-0.197191	-0.171476	-0.960559	1.84427	0.214974	1.10269	2.53895
FANCI	2.48502	2.76342	3.20009	2.99442	1.17898	-0.584334	0.936182	2.77777	2.06684	1.82474	1.88881	2.3369	1.63533	3.30221	3.32077	2.87966	2.81716	1.9011	3.70909	2.2126	2.94195	2.52778	3.10234	3.39707	3.97932	-0.533107	3.59348	4.1739	1.69761	1.21488	2.03983	2.33622	2.97457	2.98019	3.03515	0.33566	2.85852	2.87514	2.62181	2.5362	3.99338	1.76756	2.41911	2.96703	2.09063	2.91297	1.81469	2.32897	3.06528
KIF11	2.48501	2.41382	3.95171	3.38983	2.12088	-0.300961	1.52009	3.90324	2.53026	2.98799	2.56571	3.49356	2.04608	3.55382	3.94136	2.48036	3.35034	2.58041	2.94705	3.40825	2.58927	3.08734	3.54515	4.32736	4.8879	-0.295143	3.59619	3.19493	3.28446	1.74087	2.87586	3.29516	3.57421	3.36488	3.27303	0.924229	3.7898	2.87624	3.88344	3.93871	4.36536	3.06978	3.70025	2.9085	3.10241	4.01341	3.12496	3.86844	4.14523
MCM10	0.546741	0.513512	1.88253	1.93883	-1.0858	-3.04131	-0.735107	1.46178	2.217	0.21408	-0.369047	0.556596	-0.252444	0.874341	1.52747	3.14858	0.651618	-0.0979644	2.43284	0.780742	2.15629	1.36984	1.76589	1.86529	1.51669	-3.58803	2.24612	0.266702	1.16696	-1.48654	-0.970783	0.404591	1.01516	0.714792	2.24374	-0.784115	1.72299	-0.244019	1.29225	1.21091	1.24336	0.671484	2.05349	0.044199	-0.0464695	1.74653	0.568563	1.07866	2.37115
ATAD2	2.50009	2.57744	3.34765	4.67135	1.8645	0.696301	1.65769	4.02902	3.44356	2.6267	2.79891	2.87268	1.69488	2.80718	3.73827	3.55164	3.35957	2.19396	3.5868	2.6995	3.79431	2.80149	3.59693	4.1137	4.98435	-0.91908	4.51854	3.22443	3.06091	2.03439	1.74223	3.05006	3.3294	3.50117	4.47301	1.38148	3.32644	2.7956	1.29159	3.22674	3.85147	3.02551	3.70658	3.20826	2.37264	4.05584	2.60414	3.28397	3.37644
KIF18A	0.358738	-0.243265	0.761935	2.37378	-0.163433	-2.88391	0.729512	2.02549	0.621208	0.995967	0.78658	1.1489	-0.22744	1.29122	2.08739	2.26449	1.09209	1.00134	1.45936	1.11607	0.972136	1.86927	1.4764	1.70748	4.29964	-3.74685	1.63809	1.65714	0.946419	-0.41104	0.635873	0.915983	1.91857	1.9735	2.16899	-1.09113	1.95868	1.02701	1.84839	1.88404	2.7295	1.27525	1.78561	1.49777	0.717331	2.779	1.00665	2.48237	2.30576
MELK	2.68725	2.26912	2.30801	4.15399	1.52579	-1.47018	1.71197	3.92269	2.92488	2.30368	2.06914	2.67054	2.00024	1.94726	3.926	4.68567	2.64763	2.60848	3.12297	2.49914	3.75248	2.91062	3.61126	3.89087	3.62812	0.0676513	4.34618	2.73138	2.76812	1.22973	2.02288	2.61857	3.71806	4.28538	4.74664	0.689896	3.95437	2.5633	3.42161	3.41559	3.72763	2.52274	3.72049	3.69308	2.24775	3.66078	2.92439	3.32615	3.05819
MTBP	-0.745182	-0.302958	0.136096	1.3233	-1.04022	-2.19219	-1.44217	0.538863	0.616322	-0.123211	0.843161	-0.310999	-1.36747	0.239216	0.393322	0.316031	0.032734	-0.596328	-0.434536	-0.602865	-0.0526069	-0.657559	-1.09036	1.03768	1.18714	-3.74768	0.85552	0.515776	0.0809444	-1.1104	-0.941974	-0.590301	0.391552	0.290509	0.409446	-2.07795	-0.193621	-0.647267	0.0058172	0.353089	0.300335	0.150929	0.0640407	-0.171909	-0.80289	0.293473	-0.459065	-0.10802	0.268009
RAD51AP1	2.5718	1.47169	2.2321	3.34435	0.976839	-1.17962	0.985682	2.90939	2.31508	1.8968	1.45091	2.30121	0.451192	2.05134	3.01702	3.51102	1.17172	-1.37784	2.03597	2.04548	1.96174	2.90303	2.19721	2.69919	3.25832	-1.11722	2.86354	3.12228	1.90957	0.91414	0.320061	2.47801	2.42248	2.17067	2.84567	0.511	3.02578	1.63501	2.91444	3.3875	2.7032	2.28565	3.31132	2.1347	1.87922	2.9295	2.20342	2.62006	3.10967
CENPO	0.70348	1.32487	1.76944	1.65061	0.797534	-1.52889	0.454774	1.92744	1.70543	1.39245	0.986196	1.60002	0.793234	1.5837	1.94622	2.73809	0.619747	1.08269	2.77338	1.21853	2.00753	1.36928	2.07759	1.97284	2.48262	-0.770289	1.7942	0.700358	1.40128	0.659044	0.636238	1.56281	1.31973	1.36896	1.40256	0.696743	1.64076	1.20329	0.730427	1.24822	2.13591	1.37298	2.6759	1.64083	1.00456	2.33	1.43055	1.37883	1.91049
DKC1	4.22113	4.98041	3.91697	4.90978	3.77896	2.10877	3.27369	5.38258	4.29635	3.50739	3.94887	3.72896	3.42824	3.64074	5.57494	4.27098	4.28631	3.90889	4.69404	3.59949	3.86334	4.26296	3.35128	5.22445	4.85929	3.6851	4.1211	3.73048	4.18493	3.53967	3.60752	4.28358	4.05791	4.33516	5.60896	3.12439	4.54088	3.77292	4.38963	4.05574	4.19013	4.13283	4.43235	4.49309	3.5968	4.71089	3.8448	3.95198	4.44347
CENPL	0.449704	0.330656	1.93177	1.64203	-0.0533086	-0.629226	-0.0771521	1.41886	1.31024	1.37674	0.769725	1.57838	0.0105802	1.23463	1.38905	2.64645	1.39906	1.87035	1.45637	1.05763	1.53093	1.11947	1.49021	1.91398	2.48695	-0.120506	1.31578	0.903913	0.965909	0.703769	-0.151191	1.04866	3.08459	0.55778	1.30818	-0.0700641	1.03859	0.783914	1.1528	1.24068	2.24737	1.08209	1.48057	1.17469	0.244049	1.23643	0.837084	0.168747	1.32277
BRCA2	-0.528042	-0.586738	0.736369	1.16278	-0.839816	-2.01979	-0.236917	1.46214	-0.367497	1.15946	1.80305	0.545028	0.297822	1.5848	1.66691	1.57502	0.306774	0.903035	0.821297	0.421229	0.257449	0.696807	0.303637	1.57693	2.65474	-3.00681	1.3518	0.800166	0.18707	0.907953	-0.303438	1.28899	0.925495	0.632153	2.07045	-1.71251	1.3347	-0.37352	0.0592008	0.335562	2.34653	1.39522	0.274128	0.986527	0.305747	1.25042	0.293298	0.0491927	2.05331
OSBPL3	2.27154	4.52394	3.52277	2.97073	2.80188	0.874095	2.75068	3.74449	2.78483	3.72352	3.34729	3.25158	3.23243	2.39789	3.66112	2.74298	3.71655	2.37871	1.64915	2.70584	2.98165	2.39235	1.31817	4.75401	2.52095	1.09308	3.26729	2.94817	2.5579	2.59263	2.74341	3.09582	3.45969	3.22821	2.75088	1.13168	2.53021	2.27553	2.74137	3.01767	3.19175	2.7377	2.68905	2.67554	3.15152	2.84265	1.99396	4.13407	4.28166
DLEU7	-1.36113	-1.87593	-1.44158	-1.91604	-2.50875	-3.27984	-3.36751	-2.45725	-2.2902	-1.02445	-1.11857	-1.37235	-1.39999	-0.962903	-0.333258	-2.06647	-1.38872	-1.72114	0.281617	-1.32482	-1.53225	-1.89989	-0.928316	0.1915	0.168563	-4.01099	-1.45669	-0.884469	-2.27279	-1.72022	-2.86504	-0.755326	-1.38938	-1.89457	-1.34676	-3.19802	-0.115742	-2.16035	-1.99762	-1.92058	-1.60213	-0.160021	-2.50349	-1.68636	-3.12559	-1.75864	-1.83852	-3.36912	-0.780859
EME1	0.301743	0.175486	0.759475	0.732472	-1.29274	-2.77327	-0.409731	0.59461	0.137761	0.0968321	-0.899976	0.0546781	-0.267269	0.544784	1.23526	1.74013	0.93745	0.508142	1.53075	0.0182497	-0.746586	-0.0973835	-0.0511747	-0.465429	0.805159	-3.18249	1.41821	0.609911	-0.654764	-1.31071	-0.00412139	0.160635	1.50114	0.492389	1.6473	-1.66908	0.815281	-0.501374	0.176263	0.391926	0.383999	-0.24064	-0.116866	0.571298	-0.364667	1.43348	-0.697142	0.276714	1.6129
HMMR	2.10196	1.62448	1.31231	3.56947	1.72339	-1.31591	0.456762	3.504	1.66747	1.17555	2.66469	2.34334	1.40512	2.57878	3.34415	4.03199	2.40294	1.74787	1.92935	3.07478	2.45685	2.88376	2.98424	3.13688	2.94836	-1.53249	3.02939	2.82433	1.9539	1.29243	1.02028	2.54602	2.91772	3.15174	3.31536	0.799851	3.74257	1.74814	2.74736	2.87926	3.17405	2.7041	2.87696	2.71751	2.4343	4.16246	2.56835	3.26588	3.72725
HOXC-AS2	-2.91893	-6.76833	-0.668642	-0.251064	-6.21271	-5.61642	-2.10915	-0.292938	-1.72964	-1.0391	-2.65002	-1.54952	-1.90595	-0.40457	-0.136041	-0.268871	-1.40338	-2.61658	-0.027371	-1.52005	-7.36453	-0.792287	-4.02619	-0.496211	0.754409	#NAME?	-1.20005	0.156594	-2.96552	-3.92865	-3.28024	-0.30764	-1.8214	-2.09165	-7.28266	-1.24305	-3.1364	-6.2454	-3.20605	-0.500545	-0.692191	-0.6387	-1.3731	0.382598	-5.21064	-0.821589	-4.63079	-0.324886	-0.719281
TRIP13	3.11792	3.25338	2.94005	3.49309	0.307944	-1.27059	1.32623	2.14208	4.21728	2.61167	1.01547	1.55396	1.96559	1.73027	3.11787	3.27961	3.65458	2.97402	5.42178	1.4716	2.18757	2.3771	2.56019	2.03653	3.04449	-0.348106	3.38727	3.21075	2.60007	0.358974	2.66228	0.842147	3.20226	2.41512	4.12188	0.880383	2.74192	1.90674	2.47744	3.04681	3.37355	1.77095	2.70019	1.86549	1.5338	2.62728	2.35468	2.79166	4.0275
XRCC2	0.390722	0.348677	1.81549	0.266545	-0.338002	-2.28791	-0.731728	1.475	1.31072	0.829977	-0.475756	0.616304	0.349544	0.461167	1.69591	2.46492	0.876639	0.518638	1.21827	0.490692	0.423416	1.44312	-1.26229	0.632003	2.39775	-3.15656	0.203505	0.259822	1.09338	0.130255	-1.00516	0.850419	0.739141	0.380577	2.22486	-1.97436	1.11926	0.0131374	1.12041	1.38069	1.4043	0.337827	0.853027	0.413801	0.109655	1.16179	0.50508	0.579819	0.95867
GABRD	0.900831	1.71792	1.80351	-0.504777	-1.01185	-2.91307	-0.883635	0.0867175	-0.261685	-0.130432	-0.116185	1.22236	-0.746921	-0.749151	-0.354141	-0.306805	-0.478732	0.88616	0.395874	-1.04855	2.16275	0.266546	0.975566	0.129664	0.147907	-1.44013	3.08016	1.01068	1.14222	-1.97291	0.552885	2.17742	-0.563518	1.14407	-2.49684	0.716095	-1.71315	-0.381578	-1.83527	1.18418	0.551989	-0.0835638	1.02757	-1.6112	-0.634745	-0.74906	0.651454	-0.426062	0.925491
COL10A1	4.17611	-0.454403	2.06431	1.9854	0.643434	0.759345	1.49194	1.89897	3.92272	2.96281	5.16693	3.13962	4.50146	-0.0366703	-0.624254	0.527907	-2.25459	4.70982	-0.824185	1.46676	6.15122	-4.57639	3.3177	3.55772	3.37781	-3.65774	3.48668	3.46369	4.30475	3.71613	-0.386267	2.98473	-1.36988	-3.54133	-1.60733	4.24043	5.86541	3.47797	4.47005	2.5945	1.19958	3.14533	-3.26572	-0.415581	-1.86546	2.70391	2.37581	4.39563	0.509816
CKAP2L	1.43735	0.87237	2.3117	2.80252	0.657385	-1.91364	0.865832	1.77908	1.44192	1.51863	0.968312	1.63317	0.279695	0.573394	2.33219	1.65022	1.65404	1.95939	1.83761	1.29199	2.61822	1.50523	2.15585	2.9362	3.06781	-3.14598	1.90201	1.7117	1.22493	-0.164466	0.139301	1.14981	2.65614	1.70644	2.73419	-0.989062	2.06334	1.27033	1.78214	2.18992	1.82297	1.28878	2.67649	0.75949	0.64366	2.98093	1.03685	0.997294	2.1754
ENC1	4.51211	5.53301	5.13612	3.5714	5.01988	2.66061	2.14019	6.43979	4.21453	4.87997	5.68211	6.11231	4.58503	4.06972	5.28065	4.86297	3.42154	3.55892	2.22914	2.92637	4.84312	3.94673	3.16382	4.37919	3.71174	-0.130413	3.29059	4.58469	6.45373	4.85718	3.34411	5.59751	4.03733	3.9623	4.18101	4.43767	4.37769	3.99856	4.25278	4.88329	4.59714	4.42889	2.38914	3.58049	4.01945	5.21908	4.57475	3.86761	3.52721
TEAD4	3.32517	2.12344	3.48722	4.2117	2.92121	2.24643	2.46651	4.51341	3.56421	3.20535	1.51742	3.62018	3.54531	2.72638	2.94478	4.28973	1.50207	3.1069	2.61943	1.9685	3.65475	3.33032	3.35672	2.92964	3.25189	4.04688	3.72625	3.498	3.42892	1.91799	1.92407	3.69722	2.53269	3.27656	3.23592	3.48941	3.25293	3.33637	3.605	3.83496	3.93106	3.70123	3.22384	1.85239	2.22503	3.98121	3.4039	3.92697	4.5801
AC026369.2	0.107285	1.04817	-0.517479	-0.836664	-1.88164	-3.38489	-0.870525	-0.168318	-2.14371	-0.639171	-0.232793	-0.174724	0.89277	-1.90239	0.813231	0.879997	-0.979194	0.801365	0.876803	-1.63021	-1.40119	-0.425592	1.03824	-1.38397	-1.45884	-1.60146	-1.26129	-2.13725	-1.08191	-1.59758	-1.00806	-0.729131	-0.722061	-0.213747	-0.342778	-1.20354	-0.904862	-0.63139	-1.80459	-2.29876	0.714288	-0.557044	-0.589834	0.275096	0.605861	-1.72318	0.809406	-2.22263	0.670005
TROAP	2.00314	1.79933	1.99264	3.58486	1.17835	-2.17876	1.86817	2.71301	2.81446	1.58788	0.830992	1.80799	1.0363	2.48598	2.60573	4.37151	1.22467	2.17087	3.47744	2.20841	2.5525	3.11719	3.16636	2.81139	3.65516	-2.47633	2.84063	3.37197	0.680248	1.0239	2.13991	2.0988	3.07204	1.8475	2.48468	1.48335	2.12159	1.74155	2.68566	3.13532	3.25765	2.51662	3.10614	1.32222	1.51816	3.56408	1.65132	3.13907	3.17288
DLGAP5	2.1849	2.34265	1.75796	3.76595	1.32978	-1.66124	2.73459	3.42796	2.50891	1.71681	1.51161	2.36881	1.70165	1.3379	3.30071	4.41761	2.2623	1.6301	1.95613	2.42708	2.56704	3.12673	2.8508	3.60628	2.9293	-3.46278	2.76136	2.45593	2.25912	0.984952	1.69356	2.37237	2.71995	2.5262	3.0635	0.665541	3.17527	2.51781	3.35155	3.29543	4.81327	2.14979	2.70313	2.77842	2.03283	3.45464	2.35682	3.44246	3.34236
KIF4A	2.74503	1.52334	1.7416	3.42397	1.67662	-1.91197	0.711167	2.8704	2.89	2.29529	1.08871	2.47659	1.29858	1.5943	2.52102	3.11232	2.27961	2.21146	3.25444	1.93062	3.29863	2.42432	4.02744	2.2729	4.10052	-2.50016	3.76565	1.80929	1.97638	1.72534	1.04481	2.95655	3.73999	2.26517	3.67989	0.562168	2.97121	1.81749	2.44619	2.38823	3.32979	1.79766	2.84177	2.69839	1.73699	2.93949	1.92595	1.92224	3.09481
AC012073.1	-1.1018	-0.639049	1.06832	0.931801	0.17961	-2.50095	-0.475278	0.251382	0.1559	1.43483	-0.795872	0.257838	-0.0810403	0.77128	0.278996	2.42969	-0.833059	-0.616584	0.881206	0.34816	-0.457638	0.114603	0.313663	0.631545	1.86989	-3.61061	0.590855	0.615447	0.332157	-0.0957603	0.0416925	0.023566	0.724248	0.0572171	-0.582219	-0.797641	-0.751734	-1.27577	-0.424691	-0.447303	0.198185	0.187652	1.43127	0.554078	-0.06089	0.494187	0.248358	-0.172883	0.40271
SKA3	2.60606	1.34541	3.26929	4.32245	0.680534	-1.37589	1.13138	2.98487	2.58155	1.76903	1.78955	1.44749	1.65968	2.74039	3.71184	3.93837	2.77707	2.78492	3.32909	2.15911	1.8812	3.2286	3.18279	3.41312	3.51321	-2.19604	3.24082	2.57491	1.94235	1.51834	1.38914	1.77211	2.76238	2.34485	4.68291	1.05534	2.98782	2.20958	2.8625	3.03139	2.56047	3.74183	2.55832	1.253	1.64234	3.26261	2.20786	3.00991	3.94189
PGM2L1	1.25339	0.172538	1.76133	2.73525	1.40642	0.321494	1.66484	2.03165	1.30479	1.84527	2.00821	1.99801	1.71509	1.54121	0.996058	2.14856	2.32842	2.14778	1.11126	1.31801	2.90621	1.67637	0.732537	1.57865	2.03046	0.254555	1.38827	1.76924	2.101	1.55932	1.56992	1.82816	2.5611	2.76701	1.22536	1.33237	1.34741	2.61691	1.02151	1.92303	2.46374	0.535095	2.15081	2.74801	1.40757	3.65943	2.39995	0.708109	1.29978
TOP2A	4.8594	4.2353	4.72557	5.80357	3.26393	0.822427	3.54972	4.81709	4.45152	5.54354	3.96325	4.30619	3.29862	4.06387	5.12005	5.71007	4.47336	4.70382	4.78075	4.33806	4.24711	4.9922	5.56007	5.11181	5.54355	-0.901109	5.83487	5.06198	4.5742	3.4969	4.65301	4.80266	6.73512	4.51192	5.41888	2.5595	4.90071	4.04484	4.96772	5.01467	5.96594	4.02749	4.35784	4.52139	3.65767	5.09531	3.87185	4.60989	5.66824
CTHRC1	5.5223	2.61708	3.08885	3.78807	3.4229	1.2054	3.41424	3.289	4.63445	3.41316	5.76287	4.40922	6.42588	1.68735	3.00564	3.84641	1.9879	5.55428	6.37195	3.28245	6.02911	2.18882	6.31429	7.11237	5.7882	1.35738	4.36117	3.77543	5.35333	5.10621	2.45863	3.98897	2.48331	1.3659	1.85685	5.12485	5.04539	5.01864	5.41962	3.92148	3.00429	3.60917	0.909168	3.32717	2.77225	3.64359	4.73955	5.32476	4.56379
PIGW	2.21753	2.99011	1.99233	2.93809	1.11922	0.575403	1.44411	2.69204	1.77015	2.04198	2.03197	2.1359	1.33171	1.39537	2.13908	2.31081	1.98677	1.32034	2.60045	1.68339	1.66046	2.2327	1.06312	1.94917	2.63862	1.18172	1.45438	2.08849	2.12379	0.789678	1.08325	2.11717	1.39524	2.05767	3.27672	0.876633	1.86848	0.387277	2.07722	1.20262	2.45565	0.842286	1.72832	2.03862	1.18712	2.6133	1.74847	1.50808	2.2006
DBF4	2.39697	0.745576	2.69261	2.69816	1.57974	-0.283935	0.681502	3.31852	1.98594	1.59063	2.47388	2.01799	1.78062	2.61558	3.06725	3.4336	2.53663	1.63823	2.89956	2.25685	2.21649	2.69076	1.34965	2.67498	3.23163	0.931023	2.47217	1.64585	1.7892	1.83037	1.63952	2.13484	1.52036	4.21527	3.95267	0.425488	2.71479	1.48215	3.35295	3.16733	2.69715	1.88423	2.20729	2.38501	1.74244	2.41312	1.97193	2.19562	3.44098
C1orf112	0.213899	-0.327015	1.51329	1.18324	-0.728866	-0.965097	-0.969914	0.820616	0.611512	0.861768	0.439659	0.915321	-0.631395	0.753569	1.65101	1.885	1.05096	0.952813	1.65613	0.777525	1.16787	0.936012	0.430462	1.41657	1.63579	-0.574767	1.22335	0.807888	0.28256	0.00424554	-0.358786	0.493991	1.57425	0.508413	1.61809	-0.950565	1.02784	0.674285	0.390041	0.534761	1.71227	0.74385	0.761757	0.784719	-0.172079	0.937926	8.85427e-05	0.1249	0.65751
GTSE1	2.56575	2.08115	1.87941	3.90162	0.897629	-2.30528	0.603877	2.56325	3.06057	2.08972	0.184427	2.15311	1.1624	1.10833	2.16083	3.37522	1.05424	2.13747	3.34888	2.0707	2.09743	1.65894	3.82166	2.24048	3.36145	-3.96243	2.89291	2.7033	2.05962	1.14579	-0.146633	2.5139	3.69541	1.87846	3.13535	1.01041	2.3258	0.987743	2.34299	3.03584	2.74394	1.89203	2.23802	1.53739	1.21452	3.08951	1.84545	2.08568	3.48258
CLEC3B	2.6293	0.23558	1.45457	-0.573962	2.27502	1.81375	2.88227	-0.677592	1.11955	1.85233	0.803197	2.35758	2.24945	2.07327	0.569212	1.0908	-0.017593	2.1804	1.3531	2.3552	2.36048	0.796587	0.48552	-1.43983	0.699904	-0.358767	-0.064893	1.62858	2.55933	3.00895	2.0456	0.536491	0.272707	0.476166	-1.75519	3.17781	-0.0929583	0.139338	-0.678577	-0.937206	1.3029	0.90485	2.25361	0.520188	2.71512	1.8469	1.70532	-0.420511	0.797081
NDC80	1.50244	1.71154	2.04324	2.3333	0.78074	-1.15996	1.09105	2.32091	2.05072	1.7319	0.871341	1.57553	1.14431	1.0504	2.97963	4.18118	1.62038	2.49694	2.5031	2.57906	1.86912	1.94647	2.3439	3.05238	3.26506	-2.89561	3.12334	2.45258	0.677252	0.741998	1.34885	1.803	3.36041	1.84336	2.53103	0.579136	2.17603	1.34612	2.2763	2.86696	3.23677	1.8045	1.50834	1.39266	1.4687	2.9627	1.86182	2.04928	2.60696
DDIAS	0.739811	-0.255584	0.245512	3.35833	-0.77396	-2.53926	-0.3531	1.57116	1.14147	0.174845	-0.688336	0.41807	-0.298224	1.37445	1.13665	2.28982	0.726563	1.04636	2.07936	0.423882	-0.0519394	1.18465	0.0226144	0.765692	1.19502	-2.97233	1.25969	0.590864	1.19492	-0.57521	0.20604	0.700773	0.688805	0.672686	1.80628	0.200534	1.4925	0.291199	0.620735	0.903482	2.67953	-0.11062	1.54209	1.03111	-0.456881	1.07289	0.32942	1.19774	1.09206
FOXM1	3.97049	3.10951	4.36227	5.00217	2.13361	-0.494166	2.41875	4.70577	4.32017	3.69111	1.39831	3.61604	2.53705	3.74586	3.90781	5.03739	2.82344	3.17329	4.30724	2.97009	3.76561	4.04297	5.05464	4.79064	5.37006	-0.710741	5.01269	4.97383	3.17804	2.47178	1.88266	3.86976	3.55053	3.26332	4.15024	2.70709	3.71311	3.41151	4.19342	4.20785	5.18063	3.78365	4.32021	3.49482	2.79965	5.07723	3.34548	3.89438	5.58813
ADAMTS12	3.04925	0.0702265	1.0449	1.17598	0.161411	0.87862	-0.800374	1.07504	1.4079	1.74479	3.38409	1.389	3.26197	-1.64999	1.18181	-0.197699	-0.778779	2.61417	0.968263	-1.16318	3.68742	-0.820127	3.46818	1.80269	2.0241	-1.53625	2.01089	0.51938	3.3329	0.92129	-0.949329	1.46154	-2.42533	-0.773796	0.715311	1.3657	3.22297	1.69206	1.82167	0.883792	1.03509	1.04712	-0.759016	0.711863	0.590296	1.28637	1.51039	2.47056	1.84528
FAM72A	-1.32793	-2.04805	-0.516836	-0.43119	-3.07739	-4.80303	-4.03826	-1.60508	-2.36149	-2.9806	-2.28914	-1.73613	-2.31496	-1.36117	-1.00464	0.588666	-1.91556	-1.35132	-0.890367	-1.48754	-3.1819	-1.33504	-1.06984	-0.784267	0.00555627	-5.64521	-1.10341	-0.973922	-2.07413	-2.17666	-1.01618	-1.50985	-0.658428	-1.51642	-0.190046	-3.98425	-1.34998	-2.74395	-0.312288	-2.46942	-0.621643	-1.19001	-1.37055	-1.44612	-2.69681	-1.39286	-2.12225	-0.958956	-1.12711
MYBL2	5.19072	4.18281	6.27645	6.8176	2.79934	-0.48256	3.25708	4.51078	6.93068	4.9476	3.86555	4.83995	2.67674	4.0003	4.85856	6.57098	4.52816	5.1444	6.54899	5.40787	5.74127	4.93505	5.77994	4.40953	6.59343	0.506769	6.02177	4.99688	3.6153	2.61922	2.84376	4.70319	5.02441	4.77604	5.42175	4.14475	4.17022	3.83382	5.0801	4.35611	5.19383	3.95004	5.59195	5.1063	3.58144	6.74133	4.133	4.35804	7.3139
PKMYT1	3.10909	0.291095	2.77143	3.88199	0.563547	-2.71271	1.12989	2.96026	2.51174	0.734444	-0.410087	2.0731	0.424872	1.31322	1.48085	3.53433	2.38668	2.08568	3.54658	1.59272	3.70024	2.14809	3.24488	2.01637	3.55519	-1.08469	3.82937	1.36547	1.48735	0.729953	0.536017	2.43017	2.75533	2.42324	2.51016	1.65705	1.53784	1.18311	1.32445	2.3578	1.90862	2.92083	3.56885	2.02903	1.00436	3.51789	1.85384	2.56271	2.1265
ATAD5	1.2038	0.701554	1.04495	0.954823	0.429933	-0.276245	0.622539	1.49354	0.887869	1.73385	0.474612	1.28838	0.317897	1.88345	1.58095	1.4311	1.07713	0.672437	0.684135	1.11907	-0.0735163	0.657062	-0.0716022	1.72518	2.10024	-1.85911	1.42402	1.21465	1.01076	0.99649	0.080616	1.57613	1.452	1.11941	1.37572	-1.46119	0.798624	0.657261	1.04102	1.29394	1.37352	0.474632	1.20665	1.03674	0.88112	0.881265	0.665163	0.539155	1.86942
POLQ	0.588466	-0.230983	0.267236	2.26374	-0.918032	-4.07663	-0.938092	2.0877	0.318428	1.27004	-0.00262221	0.730084	-0.829921	0.638483	1.37493	2.19371	0.532271	-0.0357055	-0.265484	0.422187	0.29392	0.44719	-0.445553	0.876087	0.762547	-3.85401	2.53238	0.34863	-0.0634368	-0.8039	-0.986427	1.58272	1.02844	1.21298	1.5267	-3.26763	1.12763	-0.550926	0.477431	0.992465	0.879575	0.311495	0.901282	0.640682	0.361085	0.714045	0.779794	0.871697	1.35351
BLM	1.02284	0.586774	1.36905	1.46658	-0.445548	-2.85825	-0.59425	0.791961	1.20225	0.821165	0.326573	0.782476	0.322847	1.88319	1.80993	1.77758	0.115178	0.75934	1.82746	0.891653	0.74414	0.927044	1.19959	1.8145	2.95947	-3.23576	1.70289	2.1894	1.15955	0.8068	-0.0891054	1.01203	1.40127	1.39089	1.68886	-1.22185	1.49515	0.52027	0.271851	0.690987	2.43771	0.311372	1.06706	0.745209	0.699311	1.82162	0.688098	0.608188	1.5506
CENPK	0.150416	0.95777	0.955921	2.7806	0.0412121	-1.44754	-0.139628	2.15982	-0.0104415	0.0746972	1.02006	1.19266	1.72717	1.05507	2.11333	0.88244	0.992711	-0.280146	0.876307	1.20227	1.67507	1.50706	0.540891	2.00161	3.45923	-2.51211	1.20879	0.91461	0.626105	0.166233	0.379951	0.797355	1.22979	0.636281	1.42228	-1.03012	1.4057	0.408915	1.3334	1.27168	0.57482	1.02981	1.5622	1.35592	1.35644	1.9921	1.44224	2.41515	1.10784
FANCD2	1.63738	1.47289	1.9782	2.16725	0.183794	-1.66882	-0.0848793	1.78528	0.278032	2.1069	0.34007	1.20644	0.149403	1.88624	1.97074	2.13257	0.843036	1.60397	0.884649	1.47276	0.714003	1.17629	0.547019	2.14087	2.06122	-1.48486	2.09261	0.634192	1.42493	1.01379	0.875793	1.7421	2.42761	1.0341	2.00876	-0.551382	1.55721	0.857399	1.62349	0.958067	2.16539	0.595956	1.5962	0.929734	0.652075	2.11986	1.43681	1.13344	1.66047
BRIP1	0.237076	-0.155225	-0.132281	0.275905	-0.591451	-1.77568	0.488512	1.80176	-0.105151	-0.191551	0.347943	1.2714	0.145012	1.46484	0.482537	-0.0104103	-0.245619	-0.751336	0.112688	0.542516	0.622681	0.279135	0.12902	0.646676	1.488	-1.80758	0.612498	0.386517	-0.568015	-0.0376015	-1.75214	1.66336	-0.290626	0.981457	0.887903	-2.0042	1.03555	0.710467	0.344411	0.588108	1.4803	-0.593176	-0.0817406	1.08647	0.116364	0.828687	-0.0264656	0.781991	1.25123
MTFR2	0.566295	0.16366	1.61703	2.11062	0.573206	-2.30182	0.662832	1.73216	1.37732	1.31574	1.98045	1.04816	-0.465815	1.46059	2.55305	2.46687	1.10437	0.585183	0.252303	1.17802	2.43609	1.82776	1.10511	1.32518	2.51495	-2.75543	2.24009	0.868216	0.859278	-0.647209	0.994479	0.950892	1.72883	0.695295	2.94647	-1.10957	2.07633	0.0360452	1.809	1.97001	1.51968	1.46519	1.88926	0.981726	0.344979	1.55314	1.06449	1.60068	1.44931
KNTC1	1.13698	0.12374	1.745	2.24366	0.811022	-0.0831913	1.00469	2.32959	1.05174	1.62978	1.34591	2.29176	1.22875	2.44017	1.931	2.91681	1.10112	0.737056	1.40831	1.97256	1.78582	1.77458	1.38852	2.6067	3.46872	-0.432705	2.25301	2.26456	0.976381	1.47276	1.05278	2.18518	1.4601	2.18897	1.6106	-0.353461	1.89718	1.63314	1.49236	1.40301	2.45786	1.40579	1.76528	2.19515	1.82336	1.92274	1.00442	2.26753	2.53761
SLC39A10	1.50189	2.84981	2.39788	2.85367	1.58908	1.29726	1.40888	2.43071	2.64715	3.07181	3.10768	2.23004	2.18366	1.0962	1.63791	2.59969	1.88589	2.29899	2.41194	1.45667	2.58059	1.47692	1.11789	4.20623	2.23954	0.497634	2.05008	2.57432	1.9835	2.44736	1.90285	2.03114	2.50665	2.31483	2.77559	1.09739	2.62986	2.99786	1.81354	1.13849	1.58652	3.13043	0.189074	1.84995	1.29819	1.58804	1.40449	1.18132	3.21973
[truncated: 358 more columns]
