# Supplementary material for: Development and Verification of Ferroptosis-Related Gene Signature for Predicting the Prognosis and Immune Microenvironment in Gastric Cancer
Source: Research Square preprint supplement (doi:10.21203/rs.3.rs-1235765/v1), 2022-02-07
Supplement: Supplementary file 4 [file abc157406c26a101a0c29a93.csv]

AC005926.1	RPL8	AC005926.1|RPL8
AC107024.1	IREB2	NOX5
AC244107.2	ATP5MC3	NFE2L2
MIR3118-1	CS	ZFP36
AL117355.1	EMC2	MIR9-3
BOLA2	ACSF2	GABARAPL2
AC105272.1	NOX1	NOX4
SPATA31D1	CYBB	ACSL4
CT47A6	NOX3	DUSP1
GSG1	DUOX1	GCH1
RNA5SP410	DUOX2	ACO1
LINC00226	G6PD	GPX4
LINC02764	PGD	HAMP
GAGE12E	VDAC2	TUBE1
TTTY4C	PIK3CA	CHAC1
RN7SL327P	FLT3	SLC1A4
DEFB131C	SCP2	CAPG
MIR8084	TP53
APCDD1L-DT	LPCAT3
NPAP1	NRAS
LINC02454	KRAS
SDR42E1P4	HRAS
TSPYL6	TF
HOMER2P2	TFRC
KRTAP8-1	TFR2
AC087235.2	SLC38A1
LINC02677	SLC1A5
BX664718.1	GLS2
NTF6A	GOT1
AC008687.5	CARS1
AC093627.1	ALOX5
RNU6-1012P	KEAP1
AC008687.6	HMOX1
USP9YP20	ATG5
AC002978.1	ATG7
BX088651.2	NCOA4
AC084364.3	ALOX12
AC135068.7	ALOX12B
WIZP1	ALOX15
ZNF72P	ALOX15B
SPACA1	ALOXE3
AC126467.1	PHKG2
AC004987.3	G6PDX
OR4N3P	ULK1
ZNF519P3	ATG3
AL365356.2	ATG4D
PRSS38	BECN1
AC022616.3	MAP1LC3A
AP003419.1	GABARAPL1
AC073137.1	ATG16L1
NF1P1	WIPI1
OR11K1P	WIPI2
CGB8	SNX4
AC117500.5	ATG13
AL353707.1	ULK2
AC009406.2	SAT1
RPSAP52	EGFR
AC010146.2	MAPK3
MIR6068	MAPK1
AC116165.1	BID
RNA5S17	ZEB1
AL713866.2	DPP4
AC010760.1	CDKN2A
FLYWCH1P1	PEBP1
AC010457.1	SOCS1
SLC25A6P1	CDO1
MRGPRX11P	MYB
AC063952.3	MAPK8
AL159997.1	MAPK9
AC003988.1	MAPK14
LINC02657	LINC00472
OR4H6P	PRKAA2
AC004879.1	PRKAA1
LINC01204	ELAVL1
PLCE1P1	BAP1
BX276092.2	ABCC1
PSG4	MIR6852
CGB5	ACVR1B
AC022523.2	TGFBR1
AC130289.2	EPAS1
NR0B1	HILPDA
KRTAP2-2	HIF1A
MIR6823	IFNG
GPR78	ANO6
LINC01714	LPIN1
AC244230.1	HMGB1
CR383656.12	TNFAIP3
TRIM60P9Y	TLR4
AC044839.2	ATF3
AC022915.2	ATM
BNIP3P6	YY1AP1
RNA5SP359	EGLN2
LINC02203	MIOX
SLC25A1P4	TAZ
SSXP10	MTDH
ATP5F1AP1	IDH1
GRXCR2	SIRT1
AL160287.1	FBXW7
AC093326.1	PANX1
ADAD2	DNAJB6
MIR4509-2	BACH1
LINC00919	LONP1
CU633967.2	PTGS2
RNA5SP413	NOS2
AL162457.2	NCF2
MED15P6	MT3
AC037471.1	UBC
LINC01711	ALB
DEFB113	TXNRD1
C1QL1P1	SRXN1
RNU6-721P	GPX2
BX005195.1	BNIP3
AC025183.3	OXSR1
AC126915.1	SELENOS
RNA5SP63	ANGPTL7
NCKAP5-AS2	SLC7A11
MATN3	DDIT4
ELOVL2	LOC284561
AC091951.4	ASNS
AC099786.2	TSC22D3
RP11-11H9.2	DDIT3
ANHX	JDP2
CGB7	SESN2
AC079779.4	PCK2
FEM1AP4	TXNIP
AC084759.1	VLDLR
CGB3	GPT2
OR7E62P	PSAT1
CR383658.2	LURAP1L
LINC01208	SLC7A5
LUZP4	HERPUD1
AC013451.2	XBP1
HSFY1P1	SLC3A2
GRP	CBS
AC090164.1	ATF4
AC104395.2	ZNF419
SUGCT	KLHL24
IGHD1OR15-1A	TRIB3
AL161723.1	ZFP69B
AL807761.1	ATP6V1G2
AC063956.1	VEGFA
NF1P9	GDF15
CER1	ARRDC3
AL935212.2	CEBPG
AC007351.3	SNORA16A
MTCO1P25	RGS4
PPP1R3B	BLOC1S5-TXNDC5
UMOD	LOC390705
AL391336.2	EIF2S1
AC006249.1	KIM-1
AC084361.1	IL6
AL358876.1	CXCL2
AC098612.1	RELA
OR11J5P	HSD17B11
RNA5SP259	AGPAT3
AC008464.1	SETD1B
AC127381.1	FTL
AC022031.1	RPL8
MTND5P41	MAFG
AC073610.2	IL33
TAS1R2	FTH1
LINC00370	SLC40A1
AC006363.1	HSPB1
RNU6-699P	STEAP3
NF1P2	DRD5
LINC00973	DRD4
AL365214.2	MAP3K5
AC073464.2	SLC2A1
CYMP-AS1	SLC2A3
MAG	SLC2A6
MYH16	SLC2A8
RNA5SP279	SLC2A12
AC090673.1	GLUT13
ANKRD20A9P	SLC2A14
OR11H3P	EIF2AK4
SRGAP3-AS2	TFAP2C
AC109811.1	SP1
ARL14EPL	HBA1
GDF6	NNMT
AP004607.4	PLIN4
LINC01193	HIC1
LINC00922	STMN1
LINC01143	RRM2
AC069503.1	HNF4A
IQCA1L	NGB
BX119904.2	YWHAE
AL607076.1	GABPB1
AL589987.1	AURKA
CPZ	MIR4715
OR51A6P	RIPK1
LINC01628	PRDX1
AP004833.3	MIR30B
LINC01647	AKR1C1
AC044798.1	AKR1C2
CABP2	AKR1C3
AC005796.1	RB1
CRYGN	HSF1
FAHD2P1	GCLC
LINC00408	SQSTM1
NLRP13	NQO1
AC011586.2	MUC1
AC009901.2	MT1G
SPECC1P1	CISD1
AC135068.1	FANCD2
RP1-224A6.9	FTMT
AP000695.1	HSPA5
PPY2P	HELLS
OR4A9P	SCD
AL352984.1	FADS2
RNA5SP103	SRC
RNA5SP461	STAT3
SYT12	PML
AL158835.3	MTOR
GAD2	NFS1
ADAM21	TP63
MAN1A2P1	CDKN1A
AC022509.1	MIR137
LINC01896	ENPP2
RNA5SP150	FH
AC091153.4	CISD2
TRIM60P3Y	MIR9-1
AC022188.1	MIR9-2
NKX2-4	ISCU
IRX6	ACSL3
TFAMP2	OTUB1
AC006499.5	CD44
CST6	LINC00336
XKR5	BRD4
LINC02445	PRDX6
NIPA2P5	MIR17
IFNL4P1	NF2
CR383656.4	ARNTL
AC007547.2	JUN
DLGAP2	CA9
AL160408.4	TMBIM4
AC090644.1	PLIN2
BFAR	MIR212
LINC00705	Fer1HCH
MIR1258	AIFM2
AP001541.1	LAMP2
IRAIN	PROM2
LINC02282	CHMP5
AC109462.2	CHMP6
AP007216.2	CAV1
FZD2
AC005297.3
NPPB
RNU6-1230P
AZU1P1
AC114811.1
KRT81
CCDC166
SCAT1
RNU6-76P
MIR6854
AC007237.1
LINC01629
ADAMTS7P3
AP000695.2
CPNE8
STARP1
PCNPP3
RNA5SP404
MMP11
UBE2DNL
RP11-69H14.6
AC100775.1
CATSPER1
AC061975.6
AC118562.1
C16orf47
KCND2
SOCS2P2
AC009646.2
DUXAP2
AL008626.1
AL772202.1
AC109829.2
CHRNE
AC080128.1
AC007967.2
MIR1915
LINC00639
CYMP
RN7SKP157
NDUFB8P1
RPSAP57
C1QBPP1
GACAT3
AL138826.1
AC100807.1
RNA5SP188
KIR3DL3
TTC29
AC013275.1
RNU7-27P
AL359182.1
AC090017.1
AL592464.1
CXorf49B
MRGPRX4
AC087360.1
PCOLCE2
PITX3
AQP10
AC104395.1
AC090907.2
AL450468.2
CTSV
H2BW1
PNMA6E
AL929302.1
SIX6
AC010608.3
MIR4291
AMIGO2
NTF6B
AC021887.1
ANKRD20A1
TEX13B
OPRK1
PRAMEF33
DANT1
FAM222B
LINC00326
RN7SKP12
AL137067.1
CLCF1
BOLL
AL161785.1
RPL12P48
LINC02697
BNIP3P2
GPR87
KCNJ18
AC092634.2
AP000282.1
AL929601.4
AL365265.1
LBH
RNA5-8SP4
NPR3
YWHABP2
ABCB9
MIR4671
AC107626.1
AC090287.1
AC105219.3
RN7SL869P
KCNA7
CLDN9
AP001207.3
MARCKS
RNU4-73P
MIR4505
AL158154.2
AL596327.1
LINC02337
AL359649.1
C1QL2
SNORD113-5
MTND6P13
CTHRC1
IGHD2OR15-2A
MAP4K4
AGBL1
AC073911.1
AC124312.4
AL354976.1
AL021398.1
GAGE12J
LINC02544
AC009720.1
AL121897.1
KIAA1549L
HMGA2-AS1
YPEL5P1
TNRC18P2
LINC01872
LINC02260
LINC02263
LINC01614
RN7SKP144
AC011500.2
AC118658.1
AC003687.1
COX8C
MIR31
LINC02730
LINC01693
COL10A1
AC007326.2
TRIML2
MYL10
AL157817.1
AC002066.1
AC132825.3
AP005264.6
LINC02116
OR7E121P
RNA5SP45
BX088702.4
ADRA1B
LINC02434
AC109479.1
AL138889.1
AC021549.1
PTTG1IP
AC092672.1
AL355516.1
NCOR1P2
KCNG3
AP002795.1
AC092675.1
RNU6-1022P
AL589923.1
RPL18AP2
AP005264.2
RNU6-367P
FSCN1P1
AC090415.1
SLITRK4
BOD1P2
CMTM3
ZNF736P1Y
RNU1-7P
AP005273.1
H2AC2P
AC005479.1
TUBB8
AC114744.1
ANKRD20A3
AC068228.2
INPP5J
AC069360.1
CR383657.1
LINC02853
RNU6-496P
LINC01315
ANXA8L1
AL390755.2
AC004448.1
KLHL30
AL445623.1
ZNF519P4
SNCG
RMST
AC006548.1
CTSL3P
GPC3
LINC02714
AC133637.1
AC004699.1
OLFML2B
OR1F1
AC137932.2
AC009804.1
CTD-2277K2.1
AK4P2
GAMT
OR8S21P
AL355095.1
AP005202.1
ZNF355P
LINC02408
SLC6A15
SNX18P5
AL691482.1
AC090503.2
NACAP6
AC002542.5
FAM9B
TAF11L12
HABP2
KRTAP4-17P
MIR202
ITGB5
AP002748.2
SPSB4
AC016582.2
KCNN1
UMODL1-AS1
RN7SL310P
RNA5SP389
AC008687.2
KYNU
AL049536.1
AC092794.2
AL450423.1
AC079347.1
SRGAP1
CDH2
CST2
ITIH2
AC055716.1
IGHVIII-22-2
NDUFA5P4
CACNG7
FADS2B
HPYR1
AL356490.1
NTM
RNU2-14P
FP700111.1
AL161785.3
LINC02181
RNA5SP528
AC084198.2
FGF1
STON2
RPL7AP51
ELL2P4
AC231532.1
AC078841.1
PPP1R12BP2
RNA5SP109
LINC02008
CCDC141
LINC02818
MIR4487
AL355482.2
CLDN6
RN7SL184P
BAALC-AS1
AC090338.1
AL049792.1
PCGF2
MUC7
LINC02212
ALG9
RNF144A-AS1
MIR381HG
BIRC7
AL713965.1
CCDC8
RNU2-60P
AC010991.1
LINC02122
OR10G1P
TBC1D3F
AC079178.1
AL050303.1
VSX2
AL133391.1
AC078843.2
RAB34
AC011456.1
RIMS4
TAFA3
FBXL21P
LINC01777
AC022509.3
AL390955.1
LINC01615
RMRP
PIEZO2
AC006213.3
LINC01213
AL160271.1
ADIPOQ-AS1
AL050404.1
MXRA8
AC133634.1
MRGPRX1
AL117348.1
NRP1
CGB1
CDH6
RNU6-389P
AC130289.1
AC027369.3
AC120024.4
PABPC1P11
MYCLP1
AL009181.2
ANKRD1
SYT14
AL512310.10
LINC01895
DDX39BP2
GPR50
AC128686.1
XKR3
AP000688.1
AC117500.3
SLC7A2
OR2T5
AC012501.3
SERPINE1
VEZT
IL4
AC027601.5
CXorf49
AC090774.1
RNU4-15P
RNU6-205P
AL390254.1
AL117372.1
AC022509.4
AC083849.2
LINC02074
RNASE11
AC005255.1
RNU4-5P
LINC01374
SMURF1
MTCYBP20
PROC
AC010928.3
AC007566.2
MIR494
MRGPRX2
AL772155.3
AC064862.3
LINC00362
NMNAT1
CDKN2AIPNL
ISCUP1
AC027139.1
SLC25A34-AS1
NGF
SPATC1L
AC017067.1
RNU6-512P
AL139002.1
LINC00709
HMGN1P26
ADGRF4
AP000289.1
RPH3A
AC022509.2
AC037471.2
LINC01825
AC087762.1
ELFN1
OR5M8
AKR1B1
ACOT6
PDGFRL
AC020915.1
AC072022.1
RAX2
FAM149B1P1
SLC52A3
AL035425.2
AADAC
MESTP4
HCCAT5
SEPTIN7P5
HMGA2
HAUS4P1
LINC01150
AC243830.1
NAV2-AS4
AC147055.3
DEFB126
AC005024.1
AMHR2
MIR3119-2
AC026826.3
PLPPR4
LINC02506
TRHDE-AS1
GNAS
OR13C6P
COL11A1
AC079385.3
AC002480.1
AC002401.4
AL162726.4
RXFP3
AC005479.2
SLC35A3
AC091435.2
NTF4
PODNL1
FURIN
LINC01415
AC096733.1
LINC01887
FAM81B
GPR50-AS1
RNU6-989P
C3orf67-AS1
CCDC182
AP001342.1
FOXC2
WI2-2373I1.1
AC004945.1
C5orf15
AC093311.1
SNORD114-23
AC231760.1
CCDC74A
AC243972.2
AC139722.1
SEPTIN8
SPSB1
MIR3907
AC004846.1
AC092625.1
YY1
DPYS
FAM74A1
H2AZ2P1
SERPINA5
MIR520F
AC027612.4
FAAH
RN7SKP122
CRB1
AC007656.2
PRB2
AL353649.1
SLC17A7
SYT6
RNU6-772P
MYL7
MIR3941
AC009163.5
AC026671.1
AC007163.2
AC234775.1
AC091114.1
WFDC11
LINC01564
NECTIN3-AS1
AC010292.1
AC138356.1
PRB3
SPATA31A3
HTRA3
HNRNPH3P1
AC005899.4
AC069499.3
GGCX
AL161713.1
AC139099.3
AC018554.1
SNORD114-25
AXL
LINC01875
SPARC
RNA5SP455
AC027682.6
GLT8D1
TMEM37
AC233968.2
AC074389.2
LINC00331
AC007785.2
C5orf46
RNU6-746P
LRRN1
LINC02184
BMP1
MIR1179
AL096803.3
TDRD10
AL845472.1
RP11-80F22.8
PRR23D1
AL590666.1
EEF1DP3
HMGB3P32
AC139099.6
AC084291.1
AL929410.1
ZFYVE21
AL512604.3
RTL9
AP001005.1
AL445237.1
MARK2P10
AC128653.1
LIPK
GPX8
PSG5
ADGRF2
PRDM13
AC026992.2
AL732371.1
DHRS7C
RNU6-1317P
AL355836.1
PSAT1P2
AC023469.2
TIMP2
FAM32CP
AC131211.1
RNU6-225P
TENM3
LINC01815
PTPRR
BX323845.1
SALL3
MFAP2
MAGEA11
NOTCH3
OR10A5
AC025881.1
UPK2
IFNGR2
PRAMEF8
ELOA3D
AC004817.3
HSD3BP2
NREP
ISCA2P1
AC106872.8
CNTNAP3P1
P4HA3
PRICKLE1
WNT9B
ERRFI1
AC006548.28
ACCSL
GAS2L1P2
AC011005.3
MFGE8
NYAP1
RNU6-717P
COL25A1-DT
SPAG6
MAGED4
OR10J4
AC093267.1
AC073912.4
AL354984.1
VCAN
NECAB2
AC147055.2
AC064862.4
SULT1A3
AL391422.2
AEBP1
ARL2BPP1
AC010872.1
C9orf106
LINC02708
IGHVIII-44
SLC7A3
AC020914.3
POFUT2
CD59
RNU6-1260P
AC022092.1
AC254633.1
AC096763.1
AL122008.4
LINC01381
AL583810.2
AC025265.2
NOS2P1
SSPN
AL121956.1
AL033380.1
RWDD2A
AC105396.1
AL161716.1
CFHR4
C7orf65
LINC02186
AC114781.3
EFNB3
CCDC42
AMELY
BX510359.6
AL050327.1
GLIS2
SAMD4B
AP000873.4
FKBP1AP3
AC239585.2
AC234771.5
FAM99B
RN7SL50P
AC025419.1
AC013429.2
AC008610.1
AL365222.1
DNM3
RNU6-623P
MIR654
RN7SL356P
PPP1R1C
MIR5687
PCED1CP
ANTXR1
CYP4X1
MAGEB1
CYP19A1
LINC02329
CYP4F44P
RNU6-55P
RNA5SP152
AL353611.2
IGHVII-67-1
FGD6
IFNA1
RN7SKP191
AL513533.1
AC134312.5
SEMA5B
TTC25
AC108734.3
AC096708.2
AL929302.2
RFPL4AP1
TFPI
CNN2P8
HMGB4
AC144568.2
AC147055.4
AC073578.2
MID1
SHISA7
ZSCAN5C
RN7SL841P
LINC01700
COP1P1
FOXL1
AC012186.1
SNORD116-27
AP000563.1
AC012613.2
BGN
AC087627.1
LINC02742
AC009117.2
RNU6-505P
AC091807.1
RTN4RL2
AC114940.1
AC097451.1
AL157371.1
ARHGEF37
AL359851.1
SNX33P1
SYCN
IRGM
EVX2
LRCH4
CDKN2AIPNLP1
SCN10A
KRTAP4-2
CRB3P1
RNU7-88P
FOXN4
MIR1268A
AL121955.1
MGAT2P1
IL9RP2
RNU7-20P
AL139420.1
AC004837.3
AC023310.1
BAIAP2L1
DNAJB8
AC245036.4
NEU2
MIR577
KCNJ15
AC139491.1
AL354751.1
AL158825.2
CENPIP1
GSC2
EFCAB6-AS1
AC027088.1
AC108120.3
RNU6-620P
MIR548A3
LINC02016
RNU4-48P
SNORA3C
LNCAROD
LINC02243
AC012158.1
AC008073.1
LINC00442
GPR146
LINC01467
TRAJ54
RPS27P1
PNMA1
EVC2
CDADC1
SHOX2
AC016987.1
RN7SKP210
GGT5
AP005229.1
OR10J6P
LINC00638
AC005225.2
YPEL4
STX1A
RPL12P40
AC133548.2
FOXS1
SYCP2L
OPN3
AC006509.2
PAQR7
RNU6-46P
AL391261.1
NUAK1
SOX14
DNM1P34
NRAP
AC140063.1
TPMTP3
AC093281.2
SLC24A2
MISP3
AC091027.1
CLEC18C
LINC01056
AC005034.5
ADD2
BTG4
RBM43P1
OR51A10P
AP001208.1
Y10196.1
AL032819.1
SEPTIN4
RNU6-940P
AC083902.1
AL121820.2
SCTR
STK32A
MIR767
SLC9A3R2
RNU6-1137P
RNU6-863P
AFP
AC023141.1
BMS1P8
OR11K2P
CTBP2P1
AC135050.2
JCAD
AL139351.1
OSBPL9
LINC02692
ART1
AC005632.2
RFX5
FAP
HAGLR
RNU4-45P
RNU6-113P
MIR3666
TMCO6
AC115619.1
MAGEB3
FXNP1
KLRF2
MED15P1
KRTAP13-4
AL590004.3
AC012653.1
TTC12
AL161616.2
RETN
SMARCA1
AC098872.1
CHST9
AL592291.1
AC005394.1
ULK4P3
AP001318.2
AL669942.1
RASSF8-AS1
MRPL42P4
GLUD2
AC091965.5
AC000058.1
GATAD1
AL133279.3
AP001189.4
TMEM132E
HDLBP
RASA1
AL161896.1
AC018797.1
PPARA
AC092846.1
NDST1-AS1
TUBA3C
LGR6
DYNLL1P3
APCDD1L
KIF21B
RNU6-1243P
AL391152.1
AP001972.5
INHA
DUSP13
SDHD
NUP210P3
FAM220A
AF254983.2
AC010982.1
BUD31P1
LINC02518
MIR331
PHYHIP
KIRREL3-AS3
RP11-662J14.1
AC023141.10
IGKV2-23
PPM1AP1
MANCR
TENM4
TM4SF19
BNIP3P3
MMP14
NDUFAF4
AC140125.1
DLX5
MIR6769B
UBE2J1
AC020658.7
CTA-796E4.5
AL022316.1
MIR4287
AL137786.1
AC027458.1
AC104651.2
CFDP1
PLSCR3
FRG2FP
RIMS2
AP001189.3
RN7SL714P
FAM236A
AC087633.2
ABCA1
NEK5
EPYC
RP11-148B18.1
HNRNPA1P44
RP11-102K13.5
ACOT1
MBD6
IGSF21-AS1
PRDM6
AC007115.1
EFEMP1
AC091729.2
TPRG1-AS1
AC000111.1
CFHR3
RN7SL666P
BST1
EDDM3A
AC139103.1
LINC01565
OR6A2
AC109811.2
AC091905.4
AL451054.1
AF186996.2
TULP3
MIR323A
AC034229.2
AC080003.1
ARSK
FKBP9P1
MRPS18BP2
C4orf51
AL356475.1
AC240565.1
AC004972.1
KRT18P56
LINC00519
LINC02698
GAS2L1P1
AC010306.1
VAT1
RP11-455O6.9
AC008906.2
CPNE8-AS1
C11orf80
AC093458.1
AC106712.2
RAF1P1
ATP6V1G1P2
AC244090.2
LINC00276
AL359922.1
LINC01732
ALX4
BPI
LRRC32
LOX
AP001107.6
GRAMD4P2
AC025884.2
POM121L10P
AC092941.1
AL365274.1
DEPP1
MAGED4B
CDK6-AS1
POM121L2
AC087645.3
AL592182.1
AP002754.2
AP005060.1
AC022272.1
AC004233.1
AC095032.1
AC116666.1
RNU6ATAC4P
CYP4V2
AC005050.1
AP001476.1
NR1D1
ANOS1
AL603865.1
LOXL3
CASC18
AC015871.1
AC068781.1
AF279873.3
KCNQ1
GOLGA1
PGLYRP3
PICART1
SDF2
NETO2
NF1P6
TMEM235
AC096582.7
CYP4A11
TGFB1
SERAC1
PDYN
ITGA11
AK1
AC006487.1
WBP1
PAF1
CPLX4
CST12P
AC068580.1
GRAMD4P3
AC016769.1
RNA5SP433
RN7SL819P
AC009336.2
MIR4436B1
LINC00205
CD3EAP
AC008687.3
SKOR2
PDGFC
AC002351.1
LDHAL6DP
AC109479.3
RAB3IL1
COL1A1
DDX41
AC107208.1
ARMCX2
POM121L1P
MIR505
MIR6737
SLC6A1-AS1
AL049775.1
ACVR1
AL357518.2
AL356417.2
AC105105.2
RNU6-1250P
AL138921.2
ARHGAP42P4
SDC2
AC019080.5
AC099669.1
AC246785.2
AC138123.1
AL513423.1
FAAH2
VDAC1P13
RHOT1P3
AC009163.1
AL139286.2
AC022809.1
AC004585.2
AL353604.1
LINC02611
HSPA8P13
RPL14P5
AC007655.1
CACNB3
AC069234.5
SPINK14
AC022523.1
OR13I1P
OR2T33
EBF2
LINC00412
FRG1
CYTH3
PLA2G15
RNU6-918P
AL096869.3
EFNA3
RP11-524D16__A.3
OR2L6P
AC096669.1
IGLVI-68
AL591926.6
AC010601.2
SPATA41
AC002069.3
GGN
AC110995.1
AC011824.2
MED29
SERPINH1
AC118282.4
AF131215.1
NPY1R
RPL35AP31
KDM5A
CNOT6LP1
AC021744.1
PABPC1P5
CLBA1
CAB39P1
PLA2R1
RNU6-929P
AC018659.8
RP11-38M15.11
WDR20
AC114489.2
AC111200.2
AC091182.2
GPR176
AP002414.2
CDC40
SBK3
AP000484.1
AHSP
AC105393.1
RN7SL845P
LTBP2
ADAM21P1
AC016559.3
C2orf69
SFR1
AC092570.1
AC105036.3
TRAJ59
SUMO3
LDB2
BAGE2
EFNA5
AC009065.4
APOH
ACOT2
PCSK7
ART5
AC110620.1
RADIL
C1QTNF6
AC022784.2
RPS10P7
AC006600.2
CILP2
AC090772.1
LINC01998
SPRED2
ANKRD42
AC139453.1
AC078918.1
RAB3B
MIR1305
SPATS2L
OPN4
AC011774.1
PATJ
AL034376.1
FIGN
SSR4P1
AC079414.1
AL590705.3
GLT8D2
AC022113.2
RNU6-1023P
CENPUP1
COL1A2
MTND4LP13
SPATA31E3P
AL118557.1
RPS6KA2-IT1
AC025423.3
IL10RB-DT
WDR54
AL596087.2
GET4
AC106782.1
AL031005.1
NT5DC2
F2
CACNG6
AF064861.1
AC017002.1
ZBED9
FBN1
NHS
AL021392.1
PABPC1P13
AC024614.1
GLE1
SNORD116-25
TRIM25
AC073133.2
CKAP4
C8orf74
SPECC1L-ADORA2A
SP6
ADAM12
LZTS1
AL929601.3
UXS1
AC113410.3
GSTA6P
AL445437.1
AC007610.2
ANKRD34C-AS1
SNRPCP16
OR52A5
LEF1-AS1
RNU6-1272P
AC112240.1
ZNF883
AC112203.1
RN7SL192P
RARRES2P5
MSH5-SAPCD1
ECM1P1
TMEM191A
BACE1-AS
RETREG3
AC243836.1
RAMP1
C10orf55
AC131094.1
CNTN4-AS1
ABCA13
AC023575.1
ASCL2
KCTD14
AC005091.1
AC026461.3
MAGED1
KRT15
ANAPC11
ECM2
DNAH8
THBS2
GORAB-AS1
MIR4764
LINC01910
KRT8P23
AC007223.1
ZC3H12B
EPHB4
PUDPP3
MIR4646
AP001350.1
LINC00847
METTL11B
RNASE1
RNU6-822P
MARK3P3
RP11-374M1.10
AC007966.1
CCDC58P1
AC078785.3
AC090907.1
MIR587
AP000459.2
MIR4429
MTND4LP19
RNU11-3P
AL590617.2
AC079145.1
PADI6
ABCA6
RN7SL513P
POLE4
AL020995.2
AL136313.1
SOAT1
AC007391.1
OR7E29P
DNAH2
VIPAS39
AC020763.3
AC011462.1
AL136141.1
CD151
TRMT112P2
MPC1L
HNRNPA1P3
PSMD8P1
RP5-916L7.2
LGALS16
AC115990.1
HPS1
AC112907.2
DCBLD1
VWA5A
AL357095.1
ARMH4
BMS1P17
RNU7-69P
BX284613.2
AC126915.3
SFRP2
AC083798.2
FNDC1
MTCP1
CYS1
CEP78
MIR548AX
WNT1
ITGA3
RN7SL541P
MIR596
NWD2
AC090921.1
AKAP5
H1-8
AC006450.1
AL163636.3
RNU7-171P
VPS13B-DT
HSPA8P20
TRIM69
TNP2
GSTM4
AC104129.1
HINT3
NDUFAF5
AC011481.3
SV2B
RPS17P8
SYNDIG1
AC008014.1
APLP2
PLTP
AL158077.1
AC079336.1
MIR1915HG
AC096541.1
AP005230.1
RNF144A
NXF5
AL590399.3
SMIM10L2B
BASP1-AS1
ZC3HAV1
AL021154.1
AL512506.2
AKR1D1
AC016601.1
PPEF1
RNU6-416P
AC127521.1
RN7SL671P
ECH1
F5
MIR6861
LINC01282
LRRC58
AC067956.1
AC091057.2
MIR6870
VSTM2L
AP001775.2
AL390856.1
RASSF8
RNU6-403P
RNA5SP486
AC234782.1
IDE
HMGN2P39
PPARGC1B
AC087301.1
MTRNR2L10
LFNG
UFL1
RP11-706O15.3
LINC01386
CLDN11
AP002414.5
FGFBP1
SNORA70B
OR7E23P
RN7SL782P
MTRNR2L11
CFAP61-AS1
VWFP1
AC006213.1
AL603832.3
ZNF331
AL606534.3
FDX1
ZDHHC19
AC021146.12
KLHL38
AC026254.2
ITFG2
MYPN
AC010469.2
INHBA
SEPHS2P1
COL5A1
NME7
AC008687.4
FBXO48
IRAK1BP1
AC008069.1
AC006126.3
RP4-604K5.2
MESTP1
VDAC1P3
RNA5SP398
AC097636.1
PGAM1P5
SMIM8
HDAC8
AC073912.2
KYAT3
NTAN1
S1PR5
RPL36A-HNRNPH2
KPNA7
CUL5
SDHAF4
BEST4
RP11-491F9.5
AC000041.1
SMAD5-AS1
RNU6-570P
AC079880.3
TMEM211
AC091212.1
FKBP10
LINC02725
AL136295.3
AL359983.1
AC018755.1
P4HA2
KHK
DET1
AC020663.1
AC104819.2
LINC02551
PRDM5
AC069281.2
PLAC1
ZNF469
ST3GAL6
BTBD6
AC037487.3
DAB2
TRIM39-RPP21
ENTPD8
PKD1L1
NPR1
RNA5SP202
MIR499A
LYRM2
AL136968.1
GUCY1A2
ACTR6
ADGRV1
UBE2D3-AS1
AC005088.1
TBC1D8
AL021878.2
CPSF4
BATF2
PXDC1
AC027601.1
DCTN2
AC007610.6
P4HB
DHRS7
PRDM7
CDK14
COL5A2
CNGB3
ZNF839
AC025048.1
LINC01210
ZNF19
VSNL1
AC063952.1
MCRIP1
PCDHGA12
CC2D2A
SNHG32
RNU6-436P
RNU7-141P
COX7B
SMARCA5-AS1
AC055811.1
TANC2
PSMG3-AS1
FTLP1
AC010198.1
AP002840.2
H2BU2P
RFXAP
ADH5P2
AC005546.1
AC128687.2
NID2
RP11-444D3.1
LAMB1
VGLL3
ISLR
AP002478.1
AC008063.1
KCNK4
LINC00525
AC104435.2
NALCN
TINAGL1
GPX7
POSTN
HMGN1P13
AC099552.1
SAR1AP4
RNY4P37
SMC5
AC099518.3
STARD5
SMPD3
AC009078.1
LINC02126
AC104758.1
AL135744.1
SNAI2
NKAPD1
MIR4696
MIR4316
RN7SKP162
WNK2
AL162431.2
SPRED1
AL512506.1
GLG1
AL161729.1
ADAMTS12
CES3
AC068675.1
GULP1
CCDC178
ZNF217
LINC01655
ME2
CTLA4
SCAANT1
PSMD6
CTA-38K21.3
ZNF821
NPM1P13
FRG1KP
AC006349.1
ITGB5-AS1
SRI
ALDH3A2
CDH11
DCLK1
AL590133.1
ZNF281
PLPP4
NAT14
AL049869.4
AC009542.1
CERCAM
HSPB9
AC010331.1
RNU6-1026P
SMC1A
SERPINF1
NPM1P32
FAM181B
TRAJ23
ADAT3
NHLRC3
BX322557.10
ZNF334
PPM1J
FZD1
AC108729.1
AC131011.1
PTRH1
GSTA2
NRBP2
AUH
MTRNR2L9
AC011465.1
PFDN1
FAM53B
AL356273.6
RBMS1
AL022394.1
ZNF444
KLHDC8A
RN7SL663P
AC003991.2
AC110285.2
MAP1LC3C
AL360270.3
IL6R-AS1
AC069148.1
MOSPD3
AL391422.4
PMS2P10
EFEMP2
HOXC5
TRO
AC090151.1
CHUK
GAS1
ASS1P10
AC007389.5
AC002310.2
MET
ADAMTS2
LGALS9C
HCAR1
RPS15AP34
TMED9
BRCC3
HLX
AC241377.3
BHLHE41
AC105935.2
IST1
MIR6779
OR7E91P
AC135983.4
PDGFRB
SRPX2
VEGFB
GUSB
MARK2P9
RBBP9
GPS1
ITGB6
MEIS3
MIR3158-1
COL8A2
RPL39P29
NMNAT3
SLC23A1
AL844908.2
CIDEC
ATF7
LINC02236
AC005702.1
LRP1
UBE2B
PACRGL
AC092142.1
AK4
CYB561D1
RN7SL748P
CHD3
INPP4B
AL133297.1
PHLDB3
AC022898.2
AC078842.2
EGFLAM
DAB2IP
AL023807.1
PXDNL
NPC2
TMIGD3
TBX6
AL157838.1
LRRC6
GXYLT2
DLK2
NDUFB4P2
RNU6-824P
HDAC5
ASS1P12
AC012254.5
NUMBL
VASN
AC093591.1
EXT2
AC108134.3
EIF1AX
APH1B
CYTH2
POF1B
ANKRD49
AC108479.1
AC096734.2
AC015802.5
AC021106.3
AC022415.2
TBX3
TUBAP4
AL158089.1
HDAC7
TAF6
LINC01705
CD109
AL139398.1
MOGAT2
PCOLCE-AS1
AL513165.1
MTRNR2L6
MIR5695
SLC35E1P1
UGT2B15
RHNO1
TMED4
PLXDC1
HEYL
MAP3K8
ST3GAL6-AS1
FRA10AC1
AP003170.4
MIR4491
OS9
AC020611.1
PRKAR1B
EPHB3
SPATA13-AS1
TTYH3
DISC1-IT1
KLKB1
SLC22A17
SMYD3
BX640514.2
WDR59
P3H3
SEC14L2
ABCA3
PAX6
ZNRF1
PTPRJ-AS1
CHST3
AC091044.1
WFDC3
IGHD7-27
RNY1P9
DCST2
EDEM2
RASAL2
KIR2DS4
PPIAP39
AP1M1
SLC6A6
AL158212.3
TMEM200B
COMMD10
FASTKD1
MARVELD1
LGALS9B
NPW
LINC02381
AC139887.1
MIR4458HG
SPATA24
NDUFB4P7
CLRN3
AC110602.1
THAP12
AC104072.1
TNFAIP1
AC018445.2
APPL2
GLI1
FRMD6-AS1
POGLUT1
AC010300.1
AL512303.1
AC138696.1
AL391987.4
FABP5P7
[truncated: 365 more rows]
