# Supplementary material for: Development and Verification of Ferroptosis-Related Gene Signature for Predicting the Prognosis and Immune Microenvironment in Gastric Cancer
Source: Research Square preprint supplement (doi:10.21203/rs.3.rs-1235765/v1), 2022-02-07
Supplement: Supplementary file 5 [file ca26ef94376b4a049805da27.xlsx]

## Sheet: Sheet1
ID	StromalScore	ImmuneScore	ESTIMATEScore	TumorPurity
GSM2235556	50.5661	492.176	542.742	0.774637
GSM2235557	1071.82	1196.12	2267.94	0.591487
GSM2235558	682.755	1354.48	2037.23	0.618448
GSM2235559	392.541	1468.75	1861.29	0.638535
GSM2235560	1217.69	1633.77	2851.46	0.520339
GSM2235561	1088.97	1510.89	2599.86	0.551516
GSM2235562	-69.8596	399.954	330.094	0.793997
GSM2235563	313.112	877.885	1191	0.711046
GSM2235564	-1018.42	-80.9149	-1099.33	0.903205
GSM2235565	802.47	863.489	1665.96	0.660336
GSM2235566	539.646	998.924	1538.57	0.674262
GSM2235567	935.589	1084.25	2019.84	0.620453
GSM2235568	-594.703	-136.183	-730.886	0.878682
GSM2235569	-222.836	308.891	86.0553	0.81526
GSM2235570	659.237	957.266	1616.5	0.66577
GSM2235571	57.438	1075.13	1132.56	0.717051
GSM2235572	863.391	1843.77	2707.16	0.538309
GSM2235573	862.285	1802.5	2664.79	0.54354
GSM2235574	852.861	764.102	1616.96	0.66572
GSM2235575	-636.001	391.351	-244.65	0.8424
GSM2235576	368.442	1833.12	2201.56	0.599316
GSM2235577	1376.2	1658.07	3034.27	0.497239
GSM2235578	395.732	1675.03	2070.76	0.614574
GSM2235579	1246.85	1800.24	3047.09	0.495605
GSM2235580	1315.12	2174.49	3489.61	0.438181
GSM2235582	361.559	1123.38	1484.94	0.680055
GSM2235584	263.274	1090.9	1354.18	0.694001
GSM2235585	784.108	2101.7	2885.81	0.516027
GSM2235586	1468.84	2820.02	4288.86	0.329954
GSM2235587	613.96	1383.81	1997.77	0.622991
GSM2235588	956.613	798.984	1755.6	0.650398
GSM2235589	255.35	588.805	844.155	0.745908
GSM2235593	135.981	1337.46	1473.44	0.681291
GSM2235595	983.374	1977.72	2961.1	0.506529
GSM2235596	453.619	1323.87	1777.49	0.647953
GSM2235597	-511.827	846.615	334.788	0.793578
GSM2235598	1014.49	2265.81	3280.29	0.465589
GSM2235599	380.375	1447.54	1827.91	0.642298
GSM2235600	1251.47	1450.14	2701.61	0.538995
GSM2235601	1301.38	1444.12	2745.5	0.533558
GSM2235602	1264.1	1995.85	3259.95	0.468229
GSM2235603	171.284	597.356	768.64	0.753245
GSM2235604	442.133	1035.89	1478.02	0.680799
GSM2235605	1202.38	1547.73	2750.12	0.532984
GSM2235606	1378.82	2117.96	3496.78	0.437235
GSM2235607	1009.29	1426.64	2435.92	0.571427
GSM2235608	-472.416	689.728	217.312	0.803952
GSM2235609	1355.72	2275.08	3630.8	0.419459
GSM2235610	1580.96	1568.23	3149.19	0.482533
GSM2235611	225.241	1232.37	1457.61	0.68299
GSM2235612	1146.99	1398.82	2545.82	0.558116
GSM2235613	-650.027	268.929	-381.098	0.853023
GSM2235614	732.451	1930.12	2662.58	0.543813
GSM2235615	789.052	857.873	1646.92	0.662431
GSM2235616	454.008	1747.2	2201.21	0.599356
GSM2235617	258.858	1156.2	1415.05	0.68754
GSM2235618	-180.95	915.034	734.084	0.756572
GSM2235619	349.817	921.911	1271.73	0.702664
GSM2235620	164.132	1101.73	1265.87	0.703276
GSM2235621	419.342	854.378	1273.72	0.702456
GSM2235622	1321.04	1794.15	3115.18	0.486899
GSM2235623	-316.066	1277.36	961.289	0.734346
GSM2235624	180.906	1108.64	1289.54	0.7008
GSM2235625	1188.99	1744.74	2933.73	0.509988
GSM2235626	1719.32	1945.29	3664.61	0.41495
GSM2235627	464.951	1194.36	1659.31	0.661068
GSM2235628	1665.21	1412.83	3078.04	0.491654
GSM2235629	1364.65	1941.01	3305.66	0.46229
GSM2235630	1546.23	1803.59	3349.82	0.456533
GSM2235631	1303.79	2278.77	3582.56	0.425876
GSM2235632	839.841	2010.51	2850.35	0.520478
GSM2235633	1453.24	2090.69	3543.93	0.431001
GSM2235634	662.63	1099.62	1762.25	0.649656
GSM2235635	219.259	1508.06	1727.32	0.653545
GSM2235636	1425.18	1783.19	3208.37	0.474906
GSM2235637	156.939	1821.04	1977.98	0.62526
